# Supplementary material for: Optimized Data-Independent Acquisition Approach for Proteomic Analysis at Single-Cell Level
Source: Research Square preprint supplement (doi:10.21203/rs.3.rs-977693/v1), 2021-11-01
Supplement: Supplementary file 3 [file 0b56f8c2b0244b01a871eec1.xlsx]

## Sheet: Figure 3a
PG.ProteinAccessions	PG.Genes	PG.ProteinDescriptions	PG.ProteinNames	[14] JHU_LM2_PACC_E4_1_15min_1.raw.PG.Quantity	rank	1 cell first time			PG.ProteinAccessions	PG.Genes	PG.ProteinDescriptions	PG.ProteinNames	[9] JHU_LM2_PACC_E4_1_15min_2.raw.PG.Quantity	rank	1 cell second time				0.812043
O00299	CLIC1	Chloride intracellular channel protein 1	CLIC1_HUMAN	20553746	11	24.2929			O00299	CLIC1	Chloride intracellular channel protein 1	CLIC1_HUMAN	7843177	39	22.903
O14818	PSMA7	Proteasome subunit alpha type-7	PSA7_HUMAN	49246628	3	25.5535			O14818	PSMA7	Proteasome subunit alpha type-7	PSA7_HUMAN	2.4107e+06	145	21.201
O14950;P19105	MYL12B;MYL12A	Myosin regulatory light chain 12B;Myosin regulatory light chain 12A	ML12B_HUMAN;ML12A_HUMAN	3897184	78	21.894			O14950;P19105	MYL12B;MYL12A	Myosin regulatory light chain 12B;Myosin regulatory light chain 12A	ML12B_HUMAN;ML12A_HUMAN	6.96177e+06	47	22.731
O15511	ARPC5	Actin-related protein 2/3 complex subunit 5	ARPC5_HUMAN	1.2696e+06	191	20.2759			O15511	ARPC5	Actin-related protein 2/3 complex subunit 5	ARPC5_HUMAN	1.97872e+06	165	20.9161
O43707	ACTN4	Alpha-actinin-4	ACTN4_HUMAN	2.44451e+06	133	21.2211			O43707	ACTN4	Alpha-actinin-4	ACTN4_HUMAN	3.63137e+06	105	21.7921
O60814;P57053;P58876;P62807;Q5QNW6;Q93079;Q99877;Q99879;Q99880	HIST1H2BK;H2BFS;HIST1H2BD;HIST1H2BC;HIST2H2BF;HIST1H2BH;HIST1H2BN;HIST1H2BM;HIST1H2BL	Histone H2B type 1-K;Histone H2B type F-S;Histone H2B type 1-D;Histone H2B type 1-C/E/F/G/I;Histone H2B type 2-F;Histone H2B type 1-H;Histone H2B type 1-N;Histone H2B type 1-M;Histone H2B type 1-L	H2B1K_HUMAN;H2BFS_HUMAN;H2B1D_HUMAN;H2B1C_HUMAN;H2B2F_HUMAN;H2B1H_HUMAN;H2B1N_HUMAN;H2B1M_HUMAN;H2B1L_HUMAN	15036344	16	23.842			O60814;P57053;P58876;P62807;Q5QNW6;Q93079;Q99877;Q99879;Q99880	HIST1H2BK;H2BFS;HIST1H2BD;HIST1H2BC;HIST2H2BF;HIST1H2BH;HIST1H2BN;HIST1H2BM;HIST1H2BL	Histone H2B type 1-K;Histone H2B type F-S;Histone H2B type 1-D;Histone H2B type 1-C/E/F/G/I;Histone H2B type 2-F;Histone H2B type 1-H;Histone H2B type 1-N;Histone H2B type 1-M;Histone H2B type 1-L	H2B1K_HUMAN;H2BFS_HUMAN;H2B1D_HUMAN;H2B1C_HUMAN;H2B2F_HUMAN;H2B1H_HUMAN;H2B1N_HUMAN;H2B1M_HUMAN;H2B1L_HUMAN	12322747	25	23.5548
O75347	TBCA	Tubulin-specific chaperone A	TBCA_HUMAN	2.01333e+06	146	20.9412			O75347	TBCA	Tubulin-specific chaperone A	TBCA_HUMAN	1278385	203	20.2859
O75369	FLNB	Filamin-B	FLNB_HUMAN	3393037	95	21.6941			O75369	FLNB	Filamin-B	FLNB_HUMAN	3020577	120	21.5264
P00338	LDHA	L-lactate dehydrogenase A chain	LDHA_HUMAN	23093874	10	24.461			P00338	LDHA	L-lactate dehydrogenase A chain	LDHA_HUMAN	30893622	7	24.8808
P00558	PGK1	Phosphoglycerate kinase 1	PGK1_HUMAN	1.81583e+06	158	20.7922			P00558	PGK1	Phosphoglycerate kinase 1	PGK1_HUMAN	1.52317e+06	194	20.5386
P02545	LMNA	Prelamin-A/C	LMNA_HUMAN	11244010	22	23.4227			P02545	LMNA	Prelamin-A/C	LMNA_HUMAN	10496551	30	23.3234
P02795	MT2A	Metallothionein-2	MT2_HUMAN	6111602	45	22.5431			P02795	MT2A	Metallothionein-2	MT2_HUMAN	4.56071e+06	81	22.1208
P04075	ALDOA	Fructose-bisphosphate aldolase A	ALDOA_HUMAN	3.53878e+06	90	21.7548			P04075	ALDOA	Fructose-bisphosphate aldolase A	ALDOA_HUMAN	6.60199e+06	49	22.6545
P04083	ANXA1	Annexin A1	ANXA1_HUMAN	4.45145e+06	68	22.0858			P04083	ANXA1	Annexin A1	ANXA1_HUMAN	5621824	62	22.4226
P04406	GAPDH	Glyceraldehyde-3-phosphate dehydrogenase	G3P_HUMAN	39903316	4	25.25			P04406	GAPDH	Glyceraldehyde-3-phosphate dehydrogenase	G3P_HUMAN	38729080	6	25.2069
P05023	ATP1A1	Sodium/potassium-transporting ATPase subunit alpha-1	AT1A1_HUMAN	2.42294e+06	134	21.2083			P05023	ATP1A1	Sodium/potassium-transporting ATPase subunit alpha-1	AT1A1_HUMAN	1.96813e+06	167	20.9084
P05141	SLC25A5	ADP/ATP translocase 2	ADT2_HUMAN	3.13517e+06	99	21.5801			P05141	SLC25A5	ADP/ATP translocase 2	ADT2_HUMAN	4450502	85	22.0855
P05198	EIF2S1	Eukaryotic translation initiation factor 2 subunit 1	IF2A_HUMAN	563044	225	19.1029			P05198	EIF2S1	Eukaryotic translation initiation factor 2 subunit 1	IF2A_HUMAN	1.24305e+06	204	20.2455
P05387	RPLP2	60S acidic ribosomal protein P2	RLA2_HUMAN	1.88823e+06	154	20.8486			P05387	RPLP2	60S acidic ribosomal protein P2	RLA2_HUMAN	1.65772e+06	188	20.6608
P05388	RPLP0	60S acidic ribosomal protein P0	RLA0_HUMAN	1.87967e+06	155	20.842			P05388	RPLP0	60S acidic ribosomal protein P0	RLA0_HUMAN	1857520	176	20.8249
P05556	ITGB1	Integrin beta-1	ITB1_HUMAN	1.89078e+06	153	20.8505			P05556	ITGB1	Integrin beta-1	ITB1_HUMAN	1.83026e+06	179	20.8036
P05783	KRT18	Keratin, type I cytoskeletal 18	K1C18_HUMAN	5084934	60	22.2778			P05783	KRT18	Keratin, type I cytoskeletal 18	K1C18_HUMAN	4.26639e+06	88	22.0246
P05787	KRT8	Keratin, type II cytoskeletal 8	K2C8_HUMAN	6622269	41	22.6589			P05787	KRT8	Keratin, type II cytoskeletal 8	K2C8_HUMAN	7109107	46	22.7612
P06454	PTMA	Prothymosin alpha	PTMA_HUMAN	11142050	24	23.4095			P06454	PTMA	Prothymosin alpha	PTMA_HUMAN	26465288	10	24.6576
P06576	ATP5F1B	ATP synthase subunit beta, mitochondrial	ATPB_HUMAN	2459761	131	21.2301			P06576	ATP5F1B	ATP synthase subunit beta, mitochondrial	ATPB_HUMAN	3.37161e+06	110	21.685
P06703	S100A6	Protein S100-A6	S10A6_HUMAN	26601708	7	24.665			P06703	S100A6	Protein S100-A6	S10A6_HUMAN	29080764	8	24.7936
P06733	ENO1	Alpha-enolase	ENOA_HUMAN	10662349	25	23.346			P06733	ENO1	Alpha-enolase	ENOA_HUMAN	14161017	20	23.7554
P06744	GPI	Glucose-6-phosphate isomerase	G6PI_HUMAN	518172	227	18.9831			P06744	GPI	Glucose-6-phosphate isomerase	G6PI_HUMAN	1.52145e+06	195	20.537
P06748	NPM1	Nucleophosmin	NPM_HUMAN	8760186	31	23.0625			P06748	NPM1	Nucleophosmin	NPM_HUMAN	7.50623e+06	42	22.8397
P06753	TPM3	Tropomyosin alpha-3 chain	TPM3_HUMAN	1.24532e+06	194	20.2481			P06753	TPM3	Tropomyosin alpha-3 chain	TPM3_HUMAN	1.13561e+06	214	20.115
P06899;P23527;P33778;Q16778;Q8N257	HIST1H2BJ;HIST1H2BO;HIST1H2BB;HIST2H2BE;HIST3H2BB	Histone H2B type 1-J;Histone H2B type 1-O;Histone H2B type 1-B;Histone H2B type 2-E;Histone H2B type 3-B	H2B1J_HUMAN;H2B1O_HUMAN;H2B1B_HUMAN;H2B2E_HUMAN;H2B3B_HUMAN	36812968	5	25.1337			P06899;P23527;P33778;Q16778;Q8N257	HIST1H2BJ;HIST1H2BO;HIST1H2BB;HIST2H2BE;HIST3H2BB	Histone H2B type 1-J;Histone H2B type 1-O;Histone H2B type 1-B;Histone H2B type 2-E;Histone H2B type 3-B	H2B1J_HUMAN;H2B1O_HUMAN;H2B1B_HUMAN;H2B2E_HUMAN;H2B3B_HUMAN	59511520	4	25.8267
P07195	LDHB	L-lactate dehydrogenase B chain	LDHB_HUMAN	9095754	28	23.1168			P07195	LDHB	L-lactate dehydrogenase B chain	LDHB_HUMAN	8781730	36	23.0661
P07237	P4HB	Protein disulfide-isomerase	PDIA1_HUMAN	1.1076e+06	205	20.079			P07237	P4HB	Protein disulfide-isomerase	PDIA1_HUMAN	2.14368e+06	158	21.0317
P07355	ANXA2	Annexin A2	ANXA2_HUMAN	12808737	18	23.6106			P07355	ANXA2	Annexin A2	ANXA2_HUMAN	12965221	23	23.6281
P07437	TUBB	Tubulin beta chain	TBB5_HUMAN	16313064	14	23.9595			P07437	TUBB	Tubulin beta chain	TBB5_HUMAN	19506600	13	24.2175
P07737	PFN1	Profilin-1	PROF1_HUMAN	14018426	17	23.7408			P07737	PFN1	Profilin-1	PROF1_HUMAN	12535354	24	23.5795
P07900	HSP90AA1	Heat shock protein HSP 90-alpha	HS90A_HUMAN	7331501	38	22.8057			P07900	HSP90AA1	Heat shock protein HSP 90-alpha	HS90A_HUMAN	11359734	27	23.4374
P07910	HNRNPC	Heterogeneous nuclear ribonucleoproteins C1/C2	HNRPC_HUMAN	3587184	88	21.7744			P07910	HNRNPC	Heterogeneous nuclear ribonucleoproteins C1/C2	HNRPC_HUMAN	2213750	154	21.0781
P08133	ANXA6	Annexin A6	ANXA6_HUMAN	2.25295e+06	138	21.1034			P08133	ANXA6	Annexin A6	ANXA6_HUMAN	3049541	119	21.5402
P08238	HSP90AB1	Heat shock protein HSP 90-beta	HS90B_HUMAN	18332528	13	24.1279			P08238	HSP90AB1	Heat shock protein HSP 90-beta	HS90B_HUMAN	18062698	14	24.1065
P08670	VIM	Vimentin	VIME_HUMAN	54700380	2	25.705			P08670	VIM	Vimentin	VIME_HUMAN	41058172	5	25.2912
P08727	KRT19	Keratin, type I cytoskeletal 19	K1C19_HUMAN	1943856	148	20.8905			P08727	KRT19	Keratin, type I cytoskeletal 19	K1C19_HUMAN	3151485	115	21.5876
P08729	KRT7	Keratin, type II cytoskeletal 7	K2C7_HUMAN	4451180	69	22.0858			P08729	KRT7	Keratin, type II cytoskeletal 7	K2C7_HUMAN	3.66414e+06	104	21.805
P08758	ANXA5	Annexin A5	ANXA5_HUMAN	6.3195e+06	44	22.5914			P08758	ANXA5	Annexin A5	ANXA5_HUMAN	7.31785e+06	43	22.803
P08865	RPSA	40S ribosomal protein SA	RSSA_HUMAN	4361142	72	22.0563			P08865	RPSA	40S ribosomal protein SA	RSSA_HUMAN	10526620	29	23.3275
P09382	LGALS1	Galectin-1	LEG1_HUMAN	4507492	65	22.1039			P09382	LGALS1	Galectin-1	LEG1_HUMAN	6008283	57	22.5185
P09651	HNRNPA1	Heterogeneous nuclear ribonucleoprotein A1	ROA1_HUMAN	3.11693e+06	100	21.5717			P09651	HNRNPA1	Heterogeneous nuclear ribonucleoprotein A1	ROA1_HUMAN	2.4776e+06	140	21.2405
P0DMV8;P0DMV9	HSPA1A;HSPA1B	Heat shock 70 kDa protein 1A;Heat shock 70 kDa protein 1B	HS71A_HUMAN;HS71B_HUMAN	6.41197e+06	43	22.6123			P0DMV8;P0DMV9	HSPA1A;HSPA1B	Heat shock 70 kDa protein 1A;Heat shock 70 kDa protein 1B	HS71A_HUMAN;HS71B_HUMAN	15252595	16	23.8626
P0DP23;P0DP24;P0DP25	CALM1;CALM2;CALM3	Calmodulin-1;Calmodulin-2;Calmodulin-3	CALM1_HUMAN;CALM2_HUMAN;CALM3_HUMAN	5.66063e+06	54	22.4325			P0DP23;P0DP24;P0DP25	CALM1;CALM2;CALM3	Calmodulin-1;Calmodulin-2;Calmodulin-3	CALM1_HUMAN;CALM2_HUMAN;CALM3_HUMAN	8634411	37	23.0417
P10599	TXN	Thioredoxin	THIO_HUMAN	6.54896e+06	42	22.6428			P10599	TXN	Thioredoxin	THIO_HUMAN	13668060	21	23.7043
P10809	HSPD1	60 kDa heat shock protein, mitochondrial	CH60_HUMAN	1.89188e+06	152	20.8514			P10809	HSPD1	60 kDa heat shock protein, mitochondrial	CH60_HUMAN	2.15233e+06	157	21.0375
P11021	HSPA5	Endoplasmic reticulum chaperone BiP	BIP_HUMAN	1.51297e+06	179	20.529			P11021	HSPA5	Endoplasmic reticulum chaperone BiP	BIP_HUMAN	1.18718e+06	208	20.1791
P11142	HSPA8	Heat shock cognate 71 kDa protein	HSP7C_HUMAN	11166243	23	23.4126			P11142	HSPA8	Heat shock cognate 71 kDa protein	HSP7C_HUMAN	12277981	26	23.5496
P11586	MTHFD1	C-1-tetrahydrofolate synthase, cytoplasmic	C1TC_HUMAN	1076492	207	20.0379			P11586	MTHFD1	C-1-tetrahydrofolate synthase, cytoplasmic	C1TC_HUMAN	830701	227	19.664
P11940	PABPC1	Polyadenylate-binding protein 1	PABP1_HUMAN	1.26083e+06	193	20.2659			P11940	PABPC1	Polyadenylate-binding protein 1	PABP1_HUMAN	2.90978e+06	125	21.4725
P12268	IMPDH2	Inosine-5'-monophosphate dehydrogenase 2	IMDH2_HUMAN	2.14621e+06	140	21.0334			P12268	IMPDH2	Inosine-5'-monophosphate dehydrogenase 2	IMDH2_HUMAN	2872846	126	21.454
P13010	XRCC5	X-ray repair cross-complementing protein 5	XRCC5_HUMAN	1.19738e+06	198	20.1915			P13010	XRCC5	X-ray repair cross-complementing protein 5	XRCC5_HUMAN	909241	225	19.7943
P13489	RNH1	Ribonuclease inhibitor	RINI_HUMAN	260428	232	17.9905			P13489	RNH1	Ribonuclease inhibitor	RINI_HUMAN	1328736	202	20.3416
P13639	EEF2	Elongation factor 2	EF2_HUMAN	11686002	21	23.4783			P13639	EEF2	Elongation factor 2	EF2_HUMAN	10297940	31	23.2959
P14174	MIF	Macrophage migration inhibitory factor	MIF_HUMAN	3677137	85	21.8102			P14174	MIF	Macrophage migration inhibitory factor	MIF_HUMAN	3.16672e+06	114	21.5946
P14618	PKM	Pyruvate kinase PKM	KPYM_HUMAN	26299380	8	24.6485			P14618	PKM	Pyruvate kinase PKM	KPYM_HUMAN	28398618	9	24.7593
P14625	HSP90B1	Endoplasmin	ENPL_HUMAN	3229814	97	21.623			P14625	HSP90B1	Endoplasmin	ENPL_HUMAN	3.00159e+06	121	21.5173
P15311	EZR	Ezrin	EZRI_HUMAN	1.07842e+06	206	20.0405			P15311	EZR	Ezrin	EZRI_HUMAN	2.4253e+06	142	21.2097
P15531	NME1	Nucleoside diphosphate kinase A	NDKA_HUMAN	666709	220	19.3467			P15531	NME1	Nucleoside diphosphate kinase A	NDKA_HUMAN	1.47852e+06	199	20.4957
P15880	RPS2	40S ribosomal protein S2	RS2_HUMAN	2.94748e+06	109	21.4911			P15880	RPS2	40S ribosomal protein S2	RS2_HUMAN	6345249	52	22.5972
P16403	HIST1H1C	Histone H1.2	H12_HUMAN	10173117	27	23.2783			P16403	HIST1H1C	Histone H1.2	H12_HUMAN	14659262	18	23.8053
P16949	STMN1	Stathmin	STMN1_HUMAN	2.61309e+06	120	21.3173			P16949	STMN1	Stathmin	STMN1_HUMAN	2.72876e+06	130	21.3798
P17096	HMGA1	High mobility group protein HMG-I/HMG-Y	HMGA1_HUMAN	6902397	40	22.7187			P17096	HMGA1	High mobility group protein HMG-I/HMG-Y	HMGA1_HUMAN	5499551	63	22.3909
P17844	DDX5	Probable ATP-dependent RNA helicase DDX5	DDX5_HUMAN	1.9085e+06	150	20.864			P17844	DDX5	Probable ATP-dependent RNA helicase DDX5	DDX5_HUMAN	2.08279e+06	161	20.9901
P17987	TCP1	T-complex protein 1 subunit alpha	TCPA_HUMAN	909866	215	19.7953			P17987	TCP1	T-complex protein 1 subunit alpha	TCPA_HUMAN	2.57939e+06	135	21.2986
P18077	RPL35A	60S ribosomal protein L35a	RL35A_HUMAN	1.18075e+06	201	20.1713			P18077	RPL35A	60S ribosomal protein L35a	RL35A_HUMAN	2.07857e+06	163	20.9872
P18085	ARF4	ADP-ribosylation factor 4	ARF4_HUMAN	2.08727e+06	143	20.9932			P18085	ARF4	ADP-ribosylation factor 4	ARF4_HUMAN	1.96125e+06	168	20.9033
P18124	RPL7	60S ribosomal protein L7	RL7_HUMAN	34643028	6	25.0461			P18124	RPL7	60S ribosomal protein L7	RL7_HUMAN	3822463	99	21.8661
P18206	VCL	Vinculin	VINC_HUMAN	1.59235e+06	176	20.6027			P18206	VCL	Vinculin	VINC_HUMAN	1.59725e+06	190	20.6072
P19338	NCL	Nucleolin	NUCL_HUMAN	4521908	63	22.1085			P19338	NCL	Nucleolin	NUCL_HUMAN	3.97844e+06	93	21.9238
P21291	CSRP1	Cysteine and glycine-rich protein 1	CSRP1_HUMAN	832324	219	19.6668			P21291	CSRP1	Cysteine and glycine-rich protein 1	CSRP1_HUMAN	1.11525e+06	215	20.0889
P21333	FLNA	Filamin-A	FLNA_HUMAN	5272133	55	22.33			P21333	FLNA	Filamin-A	FLNA_HUMAN	5.6313e+06	61	22.425
P21980	TGM2	Protein-glutamine gamma-glutamyltransferase 2	TGM2_HUMAN	3.50071e+06	92	21.7392			P21980	TGM2	Protein-glutamine gamma-glutamyltransferase 2	TGM2_HUMAN	6.03763e+06	56	22.5256
P22392	NME2	Nucleoside diphosphate kinase B	NDKB_HUMAN	5806050	53	22.4691			P22392	NME2	Nucleoside diphosphate kinase B	NDKB_HUMAN	7.1599e+06	45	22.7715
P22626	HNRNPA2B1	Heterogeneous nuclear ribonucleoproteins A2/B1	ROA2_HUMAN	4983394	61	22.2487			P22626	HNRNPA2B1	Heterogeneous nuclear ribonucleoproteins A2/B1	ROA2_HUMAN	6.34988e+06	51	22.5983
P23284	PPIB	Peptidyl-prolyl cis-trans isomerase B	PPIB_HUMAN	2.09375e+06	142	20.9977			P23284	PPIB	Peptidyl-prolyl cis-trans isomerase B	PPIB_HUMAN	2.56461e+06	136	21.2903
P23396	RPS3	40S ribosomal protein S3	RS3_HUMAN	1.24262e+06	196	20.245			P23396	RPS3	40S ribosomal protein S3	RS3_HUMAN	3.08489e+06	116	21.5568
P23526	AHCY	Adenosylhomocysteinase	SAHH_HUMAN	837849	218	19.6763			P23526	AHCY	Adenosylhomocysteinase	SAHH_HUMAN	2.6968e+06	132	21.3628
P23528	CFL1	Cofilin-1	COF1_HUMAN	8.04629e+06	32	22.9399			P23528	CFL1	Cofilin-1	COF1_HUMAN	14464923	19	23.7861
P24534	EEF1B2	Elongation factor 1-beta	EF1B_HUMAN	6076055	48	22.5347			P24534	EEF1B2	Elongation factor 1-beta	EF1B_HUMAN	6.20333e+06	53	22.5646
P25398	RPS12	40S ribosomal protein S12	RS12_HUMAN	2.46632e+06	128	21.2339			P25398	RPS12	40S ribosomal protein S12	RS12_HUMAN	5.71529e+06	59	22.4464
P25705	ATP5F1A	ATP synthase subunit alpha, mitochondrial	ATPA_HUMAN	1.7379e+06	164	20.7289			P25705	ATP5F1A	ATP synthase subunit alpha, mitochondrial	ATPA_HUMAN	1.91493e+06	170	20.8689
P25787	PSMA2	Proteasome subunit alpha type-2	PSA2_HUMAN	315715	230	18.2683			P25787	PSMA2	Proteasome subunit alpha type-2	PSA2_HUMAN	310925	232	18.2462
P25788	PSMA3	Proteasome subunit alpha type-3	PSA3_HUMAN	1.22154e+06	197	20.2203			P25788	PSMA3	Proteasome subunit alpha type-3	PSA3_HUMAN	1.00577e+06	221	19.9399
P25789	PSMA4	Proteasome subunit alpha type-4	PSA4_HUMAN	1.73244e+06	165	20.7244			P25789	PSMA4	Proteasome subunit alpha type-4	PSA4_HUMAN	1.90263e+06	172	20.8596
P26006	ITGA3	Integrin alpha-3	ITA3_HUMAN	1.67528e+06	169	20.676			P26006	ITGA3	Integrin alpha-3	ITA3_HUMAN	1.3734e+06	200	20.3893
P26038	MSN	Moesin	MOES_HUMAN	2697853	119	21.3634			P26038	MSN	Moesin	MOES_HUMAN	1.84148e+06	178	20.8124
P26373	RPL13	60S ribosomal protein L13	RL13_HUMAN	3180180	98	21.6007			P26373	RPL13	60S ribosomal protein L13	RL13_HUMAN	5.26927e+06	68	22.3292
P26447	S100A4	Protein S100-A4	S10A4_HUMAN	2.26801e+06	136	21.113			P26447	S100A4	Protein S100-A4	S10A4_HUMAN	1.8441e+06	177	20.8145
P26599	PTBP1	Polypyrimidine tract-binding protein 1	PTBP1_HUMAN	3.74574e+06	81	21.8368			P26599	PTBP1	Polypyrimidine tract-binding protein 1	PTBP1_HUMAN	4534813	82	22.1126
P26639	TARS	Threonine--tRNA ligase, cytoplasmic	SYTC_HUMAN	927972	214	19.8237			P26639	TARS	Threonine--tRNA ligase, cytoplasmic	SYTC_HUMAN	1151842	211	20.1355
P26641	EEF1G	Elongation factor 1-gamma	EF1G_HUMAN	3321778	96	21.6635			P26641	EEF1G	Elongation factor 1-gamma	EF1G_HUMAN	5.22068e+06	69	22.3158
P27348	YWHAQ	14-3-3 protein theta	1433T_HUMAN	1.52394e+06	178	20.5394			P27348	YWHAQ	14-3-3 protein theta	1433T_HUMAN	9684617	35	23.2073
P28072	PSMB6	Proteasome subunit beta type-6	PSB6_HUMAN	3087142	102	21.5578			P28072	PSMB6	Proteasome subunit beta type-6	PSB6_HUMAN	2.96017e+06	123	21.4972
P29401	TKT	Transketolase	TKT_HUMAN	3111929	101	21.5694			P29401	TKT	Transketolase	TKT_HUMAN	4.02751e+06	90	21.9415
P29692	EEF1D	Elongation factor 1-delta	EF1D_HUMAN	2.46919e+06	127	21.2356			P29692	EEF1D	Elongation factor 1-delta	EF1D_HUMAN	3.54096e+06	107	21.7557
P30041	PRDX6	Peroxiredoxin-6	PRDX6_HUMAN	1.67651e+06	168	20.677			P30041	PRDX6	Peroxiredoxin-6	PRDX6_HUMAN	1.10737e+06	216	20.0787
P30050	RPL12	60S ribosomal protein L12	RL12_HUMAN	4.51159e+06	64	22.1052			P30050	RPL12	60S ribosomal protein L12	RL12_HUMAN	4901036	76	22.2247
P30086	PEBP1	Phosphatidylethanolamine-binding protein 1	PEBP1_HUMAN	454723	229	18.7946			P30086	PEBP1	Phosphatidylethanolamine-binding protein 1	PEBP1_HUMAN	998007	222	19.9287
P30101	PDIA3	Protein disulfide-isomerase A3	PDIA3_HUMAN	1.45569e+06	183	20.4733			P30101	PDIA3	Protein disulfide-isomerase A3	PDIA3_HUMAN	2422536	143	21.2081
P31946	YWHAB	14-3-3 protein beta/alpha	1433B_HUMAN	5118925	58	22.2874			P31946	YWHAB	14-3-3 protein beta/alpha	1433B_HUMAN	4863987	77	22.2137
P31948	STIP1	Stress-induced-phosphoprotein 1	STIP1_HUMAN	978958	211	19.9009			P31948	STIP1	Stress-induced-phosphoprotein 1	STIP1_HUMAN	2.09126e+06	159	20.9959
P31949	S100A11	Protein S100-A11	S10AB_HUMAN	2.73561e+06	118	21.3834			P31949	S100A11	Protein S100-A11	S10AB_HUMAN	1.90176e+06	174	20.8589
P32119	PRDX2	Peroxiredoxin-2	PRDX2_HUMAN	2.9952e+06	106	21.5142			P32119	PRDX2	Peroxiredoxin-2	PRDX2_HUMAN	3.53942e+06	108	21.7551
P34897	SHMT2	Serine hydroxymethyltransferase, mitochondrial	GLYM_HUMAN	1.27786e+06	190	20.2853			P34897	SHMT2	Serine hydroxymethyltransferase, mitochondrial	GLYM_HUMAN	1.771e+06	182	20.7561
P35232	PHB	Prohibitin	PHB_HUMAN	1.14278e+06	203	20.1241			P35232	PHB	Prohibitin	PHB_HUMAN	825030	228	19.6541
P35241	RDX	Radixin	RADI_HUMAN	1.44538e+06	184	20.463			P35241	RDX	Radixin	RADI_HUMAN	5073177	74	22.2745
P35268	RPL22	60S ribosomal protein L22	RL22_HUMAN	5165315	57	22.3004			P35268	RPL22	60S ribosomal protein L22	RL22_HUMAN	6149528	55	22.552
P35579	MYH9	Myosin-9	MYH9_HUMAN	3455251	93	21.7204			P35579	MYH9	Myosin-9	MYH9_HUMAN	3.07236e+06	117	21.5509
P35613	BSG	Basigin	BASI_HUMAN	2554153	122	21.2844			P35613	BSG	Basigin	BASI_HUMAN	2.6998e+06	131	21.3644
P35637	FUS	RNA-binding protein FUS	FUS_HUMAN	1.58895e+06	177	20.5996			P35637	FUS	RNA-binding protein FUS	FUS_HUMAN	3912439	95	21.8996
P36578	RPL4	60S ribosomal protein L4	RL4_HUMAN	1.90633e+06	151	20.8624			P36578	RPL4	60S ribosomal protein L4	RL4_HUMAN	1.50468e+06	196	20.521
P37802	TAGLN2	Transgelin-2	TAGL2_HUMAN	1768341	162	20.754			P37802	TAGLN2	Transgelin-2	TAGL2_HUMAN	1.05349e+06	218	20.0067
P37837	TALDO1	Transaldolase	TALDO_HUMAN	2226836	139	21.0866			P37837	TALDO1	Transaldolase	TALDO_HUMAN	2528781	138	21.27
P38646	HSPA9	Stress-70 protein, mitochondrial	GRP75_HUMAN	1.2618e+06	192	20.2671			P38646	HSPA9	Stress-70 protein, mitochondrial	GRP75_HUMAN	1.66385e+06	187	20.6661
P38919	EIF4A3	Eukaryotic initiation factor 4A-III	IF4A3_HUMAN	23494130	9	24.4858			P38919	EIF4A3	Eukaryotic initiation factor 4A-III	IF4A3_HUMAN	17365962	15	24.0498
P39019	RPS19	40S ribosomal protein S19	RS19_HUMAN	2.82855e+06	114	21.4316			P39019	RPS19	40S ribosomal protein S19	RS19_HUMAN	2277647	153	21.1191
P40925	MDH1	Malate dehydrogenase, cytoplasmic	MDHC_HUMAN	2.08286e+06	144	20.9901			P40925	MDH1	Malate dehydrogenase, cytoplasmic	MDHC_HUMAN	2602105	134	21.3112
P40926	MDH2	Malate dehydrogenase, mitochondrial	MDHM_HUMAN	1.61236e+06	173	20.6207			P40926	MDH2	Malate dehydrogenase, mitochondrial	MDHM_HUMAN	2.42157e+06	144	21.2075
P41250	GARS	Glycine--tRNA ligase	GARS_HUMAN	1.43437e+06	185	20.452			P41250	GARS	Glycine--tRNA ligase	GARS_HUMAN	1046303	219	19.9969
P42766	RPL35	60S ribosomal protein L35	RL35_HUMAN	3.59046e+06	87	21.7757			P42766	RPL35	60S ribosomal protein L35	RL35_HUMAN	5081390	73	22.2768
P46060	RANGAP1	Ran GTPase-activating protein 1	RAGP1_HUMAN	10327655	26	23.3			P46060	RANGAP1	Ran GTPase-activating protein 1	RAGP1_HUMAN	4314982	87	22.0409
P46776	RPL27A	60S ribosomal protein L27a	RL27A_HUMAN	6.10169e+06	46	22.5408			P46776	RPL27A	60S ribosomal protein L27a	RL27A_HUMAN	5.21476e+06	70	22.3142
P46777	RPL5	60S ribosomal protein L5	RL5_HUMAN	1.78641e+06	160	20.7686			P46777	RPL5	60S ribosomal protein L5	RL5_HUMAN	974647	223	19.8945
P46781	RPS9	40S ribosomal protein S9	RS9_HUMAN	2.03644e+06	145	20.9576			P46781	RPS9	40S ribosomal protein S9	RS9_HUMAN	1.97182e+06	166	20.9111
P47914	RPL29	60S ribosomal protein L29	RL29_HUMAN	4.0965e+06	76	21.966			P47914	RPL29	60S ribosomal protein L29	RL29_HUMAN	5.19649e+06	72	22.3091
P48643	CCT5	T-complex protein 1 subunit epsilon	TCPE_HUMAN	1.81575e+06	159	20.7921			P48643	CCT5	T-complex protein 1 subunit epsilon	TCPE_HUMAN	1.99804e+06	164	20.9302
P49321	NASP	Nuclear autoantigenic sperm protein	NASP_HUMAN	12128168	20	23.5319			P49321	NASP	Nuclear autoantigenic sperm protein	NASP_HUMAN	128692368	1	26.9394
P49368	CCT3	T-complex protein 1 subunit gamma	TCPG_HUMAN	1.18734e+06	200	20.1793			P49368	CCT3	T-complex protein 1 subunit gamma	TCPG_HUMAN	2.16345e+06	156	21.0449
P50914	RPL14	60S ribosomal protein L14	RL14_HUMAN	1.60292e+06	174	20.6123			P50914	RPL14	60S ribosomal protein L14	RL14_HUMAN	2375636	148	21.1799
P50990	CCT8	T-complex protein 1 subunit theta	TCPQ_HUMAN	565839	224	19.11			P50990	CCT8	T-complex protein 1 subunit theta	TCPQ_HUMAN	1.93764e+06	169	20.8859
P50991	CCT4	T-complex protein 1 subunit delta	TCPD_HUMAN	3.00863e+06	105	21.5207			P50991	CCT4	T-complex protein 1 subunit delta	TCPD_HUMAN	2.3141e+06	150	21.142
P51149	RAB7A	Ras-related protein Rab-7a	RAB7A_HUMAN	1.17302e+06	202	20.1618			P51149	RAB7A	Ras-related protein Rab-7a	RAB7A_HUMAN	1.77843e+06	181	20.7622
P51858	HDGF	Hepatoma-derived growth factor	HDGF_HUMAN	2.52071e+06	124	21.2654			P51858	HDGF	Hepatoma-derived growth factor	HDGF_HUMAN	2781026	128	21.4072
P52272	HNRNPM	Heterogeneous nuclear ribonucleoprotein M	HNRPM_HUMAN	1.38515e+06	186	20.4016			P52272	HNRNPM	Heterogeneous nuclear ribonucleoprotein M	HNRPM_HUMAN	2.08299e+06	160	20.9902
P52566	ARHGDIB	Rho GDP-dissociation inhibitor 2	GDIR2_HUMAN	1742530	163	20.7328			P52566	ARHGDIB	Rho GDP-dissociation inhibitor 2	GDIR2_HUMAN	2.31191e+06	151	21.1407
P52597	HNRNPF	Heterogeneous nuclear ribonucleoprotein F	HNRPF_HUMAN	632898	221	19.2716			P52597	HNRNPF	Heterogeneous nuclear ribonucleoprotein F	HNRPF_HUMAN	1.09466e+06	217	20.0621
P53396	ACLY	ATP-citrate synthase	ACLY_HUMAN	581106	223	19.1484			P53396	ACLY	ATP-citrate synthase	ACLY_HUMAN	1.17271e+06	210	20.1614
P53671	LIMK2	LIM domain kinase 2	LIMK2_HUMAN	4.4769e+06	67	22.0941			P53671	LIMK2	LIM domain kinase 2	LIMK2_HUMAN	2333506	149	21.1541
P53999	SUB1	Activated RNA polymerase II transcriptional coactivator p15	TCP4_HUMAN	1.70988e+06	166	20.7055			P53999	SUB1	Activated RNA polymerase II transcriptional coactivator p15	TCP4_HUMAN	1881764	175	20.8437
P54727	RAD23B	UV excision repair protein RAD23 homolog B	RD23B_HUMAN	984591	210	19.9092			P54727	RAD23B	UV excision repair protein RAD23 homolog B	RD23B_HUMAN	1.13857e+06	213	20.1188
P55060	CSE1L	Exportin-2	XPO2_HUMAN	18774392	12	24.1623			P55060	CSE1L	Exportin-2	XPO2_HUMAN	100517552	3	26.5829
P55072	VCP	Transitional endoplasmic reticulum ATPase	TERA_HUMAN	965021	212	19.8802			P55072	VCP	Transitional endoplasmic reticulum ATPase	TERA_HUMAN	1694885	185	20.6928
P55854;P61956;Q6EEV6	SUMO3;SUMO2;SUMO4	Small ubiquitin-related modifier 3;Small ubiquitin-related modifier 2;Small ubiquitin-related modifier 4	SUMO3_HUMAN;SUMO2_HUMAN;SUMO4_HUMAN	3019670	104	21.526			P55854;P61956;Q6EEV6	SUMO3;SUMO2;SUMO4	Small ubiquitin-related modifier 3;Small ubiquitin-related modifier 2;Small ubiquitin-related modifier 4	SUMO3_HUMAN;SUMO2_HUMAN;SUMO4_HUMAN	4331453	86	22.0464
P56537	EIF6	Eukaryotic translation initiation factor 6	IF6_HUMAN	4.15092e+06	75	21.985			P56537	EIF6	Eukaryotic translation initiation factor 6	IF6_HUMAN	6.17764e+06	54	22.5586
P60174	TPI1	Triosephosphate isomerase	TPIS_HUMAN	8034279	33	22.9377			P60174	TPI1	Triosephosphate isomerase	TPIS_HUMAN	10863768	28	23.373
P60660	MYL6	Myosin light polypeptide 6	MYL6_HUMAN	2464545	129	21.2329			P60660	MYL6	Myosin light polypeptide 6	MYL6_HUMAN	3197168	113	21.6084
P60763;P63000	RAC3;RAC1	Ras-related C3 botulinum toxin substrate 3;Ras-related C3 botulinum toxin substrate 1	RAC3_HUMAN;RAC1_HUMAN	3438605	94	21.7134			P60763;P63000	RAC3;RAC1	Ras-related C3 botulinum toxin substrate 3;Ras-related C3 botulinum toxin substrate 1	RAC3_HUMAN;RAC1_HUMAN	2.91332e+06	124	21.4742
P60842	EIF4A1	Eukaryotic initiation factor 4A-I	IF4A1_HUMAN	4.08124e+06	77	21.9606			P60842	EIF4A1	Eukaryotic initiation factor 4A-I	IF4A1_HUMAN	4.49278e+06	83	22.0992
P60866	RPS20	40S ribosomal protein S20	RS20_HUMAN	2.88395e+06	111	21.4596			P60866	RPS20	40S ribosomal protein S20	RS20_HUMAN	5.4685e+06	64	22.3827
P60903	S100A10	Protein S100-A10	S10AA_HUMAN	7.40169e+06	37	22.8194			P60903	S100A10	Protein S100-A10	S10AA_HUMAN	4.83516e+06	78	22.2051
P60981	DSTN	Destrin	DEST_HUMAN	1.33141e+06	188	20.3445			P60981	DSTN	Destrin	DEST_HUMAN	2.17267e+06	155	21.051
P61088	UBE2N	Ubiquitin-conjugating enzyme E2 N	UBE2N_HUMAN	2.46303e+06	130	21.232			P61088	UBE2N	Ubiquitin-conjugating enzyme E2 N	UBE2N_HUMAN	3.05248e+06	118	21.5415
P61224;P62834	RAP1B;RAP1A	Ras-related protein Rap-1b;Ras-related protein Rap-1A	RAP1B_HUMAN;RAP1A_HUMAN	1.64192e+06	171	20.647			P61224;P62834	RAP1B;RAP1A	Ras-related protein Rap-1b;Ras-related protein Rap-1A	RAP1B_HUMAN;RAP1A_HUMAN	1.14448e+06	212	20.1263
P61247	RPS3A	40S ribosomal protein S3a	RS3A_HUMAN	3.81769e+06	79	21.8643			P61247	RPS3A	40S ribosomal protein S3a	RS3A_HUMAN	3.49135e+06	109	21.7354
P61254;Q9UNX3	RPL26;RPL26L1	60S ribosomal protein L26;60S ribosomal protein L26-like 1	RL26_HUMAN;RL26L_HUMAN	2.87049e+06	112	21.4529			P61254;Q9UNX3	RPL26;RPL26L1	60S ribosomal protein L26;60S ribosomal protein L26-like 1	RL26_HUMAN;RL26L_HUMAN	1.90826e+06	171	20.8638
P61313	RPL15	60S ribosomal protein L15	RL15_HUMAN	2607090	121	21.314			P61313	RPL15	60S ribosomal protein L15	RL15_HUMAN	7.97518e+06	38	22.9271
P61353	RPL27	60S ribosomal protein L27	RL27_HUMAN	4450284	70	22.0855			P61353	RPL27	60S ribosomal protein L27	RL27_HUMAN	3.31778e+06	112	21.6618
P61604	HSPE1	10 kDa heat shock protein, mitochondrial	CH10_HUMAN	4223834	73	22.0101			P61604	HSPE1	10 kDa heat shock protein, mitochondrial	CH10_HUMAN	4146711	89	21.9835
P61978	HNRNPK	Heterogeneous nuclear ribonucleoprotein K	HNRPK_HUMAN	2373662	135	21.1787			P61978	HNRNPK	Heterogeneous nuclear ribonucleoprotein K	HNRPK_HUMAN	2.40446e+06	146	21.1973
P62241	RPS8	40S ribosomal protein S8	RS8_HUMAN	1.35729e+06	187	20.3723			P62241	RPS8	40S ribosomal protein S8	RS8_HUMAN	3.90457e+06	96	21.8967
P62244	RPS15A	40S ribosomal protein S15a	RS15A_HUMAN	1.77684e+06	161	20.7609			P62244	RPS15A	40S ribosomal protein S15a	RS15A_HUMAN	5642062	60	22.4278
P62258	YWHAE	14-3-3 protein epsilon	1433E_HUMAN	3671584	86	21.808			P62258	YWHAE	14-3-3 protein epsilon	1433E_HUMAN	3861939	98	21.8809
P62263	RPS14	40S ribosomal protein S14	RS14_HUMAN	5114108	59	22.2861			P62263	RPS14	40S ribosomal protein S14	RS14_HUMAN	7.30682e+06	44	22.8008
P62269	RPS18	40S ribosomal protein S18	RS18_HUMAN	3572750	89	21.7686			P62269	RPS18	40S ribosomal protein S18	RS18_HUMAN	3.98957e+06	92	21.9278
P62277	RPS13	40S ribosomal protein S13	RS13_HUMAN	1.24281e+06	195	20.2452			P62277	RPS13	40S ribosomal protein S13	RS13_HUMAN	3.3538e+06	111	21.6774
P62316	SNRPD2	Small nuclear ribonucleoprotein Sm D2	SMD2_HUMAN	959713	213	19.8722			P62316	SNRPD2	Small nuclear ribonucleoprotein Sm D2	SMD2_HUMAN	1.74148e+06	184	20.7319
P62328	TMSB4X	Thymosin beta-4	TYB4_HUMAN	7797773	34	22.8946			P62328	TMSB4X	Thymosin beta-4	TYB4_HUMAN	10029281	34	23.2577
P62424	RPL7A	60S ribosomal protein L7a	RL7A_HUMAN	2.83076e+06	113	21.4328			P62424	RPL7A	60S ribosomal protein L7a	RL7A_HUMAN	1.5039e+06	197	20.5203
P62753	RPS6	40S ribosomal protein S6	RS6_HUMAN	1.07481e+06	208	20.0357			P62753	RPS6	40S ribosomal protein S6	RS6_HUMAN	1.69415e+06	186	20.6921
P62805	HIST1H4A	Histone H4	H4_HUMAN	5907356	52	22.4941			P62805	HIST1H4A	Histone H4	H4_HUMAN	13401235	22	23.6759
P62826	RAN	GTP-binding nuclear protein Ran	RAN_HUMAN	8776978	30	23.0653			P62826	RAN	GTP-binding nuclear protein Ran	RAN_HUMAN	10176669	33	23.2788
P62851	RPS25	40S ribosomal protein S25	RS25_HUMAN	2.94878e+06	108	21.4917			P62851	RPS25	40S ribosomal protein S25	RS25_HUMAN	3.76703e+06	100	21.845
P62854;Q5JNZ5	RPS26;RPS26P11	40S ribosomal protein S26;Putative 40S ribosomal protein S26-like 1	RS26_HUMAN;RS26L_HUMAN	5927600	50	22.499			P62854;Q5JNZ5	RPS26;RPS26P11	40S ribosomal protein S26;Putative 40S ribosomal protein S26-like 1	RS26_HUMAN;RS26L_HUMAN	6884249	48	22.7149
P62873	GNB1	Guanine nucleotide-binding protein G(I)/G(S)/G(T) subunit beta-1	GBB1_HUMAN	1.87677e+06	156	20.8398			P62873	GNB1	Guanine nucleotide-binding protein G(I)/G(S)/G(T) subunit beta-1	GBB1_HUMAN	1.52705e+06	193	20.5423
P62899	RPL31	60S ribosomal protein L31	RL31_HUMAN	7.74437e+06	35	22.8847			P62899	RPL31	60S ribosomal protein L31	RL31_HUMAN	5299514	66	22.3374
P62906	RPL10A	60S ribosomal protein L10a	RL10A_HUMAN	2789715	115	21.4117			P62906	RPL10A	60S ribosomal protein L10a	RL10A_HUMAN	6574480	50	22.6484
P62917	RPL8	60S ribosomal protein L8	RL8_HUMAN	4209574	74	22.0052			P62917	RPL8	60S ribosomal protein L8	RL8_HUMAN	4.8345e+06	79	22.2049
P62937	PPIA	Peptidyl-prolyl cis-trans isomerase A	PPIA_HUMAN	5.92187e+06	51	22.4976			P62937	PPIA	Peptidyl-prolyl cis-trans isomerase A	PPIA_HUMAN	7.6346e+06	41	22.8641
P62942	FKBP1A	Peptidyl-prolyl cis-trans isomerase FKBP1A	FKB1A_HUMAN	5223331	56	22.3165			P62942	FKBP1A	Peptidyl-prolyl cis-trans isomerase FKBP1A	FKB1A_HUMAN	5846564	58	22.4792
P62979	RPS27A	Ubiquitin-40S ribosomal protein S27a	RS27A_HUMAN	7511653	36	22.8407			P62979	RPS27A	Ubiquitin-40S ribosomal protein S27a	RS27A_HUMAN	5277151	67	22.3313
P63104	YWHAZ	14-3-3 protein zeta/delta	1433Z_HUMAN	6.08675e+06	47	22.5372			P63104	YWHAZ	14-3-3 protein zeta/delta	1433Z_HUMAN	10279005	32	23.2932
P63220	RPS21	40S ribosomal protein S21	RS21_HUMAN	2.95454e+06	107	21.4945			P63220	RPS21	40S ribosomal protein S21	RS21_HUMAN	4.45394e+06	84	22.0867
P63244	RACK1	Receptor of activated protein C kinase 1	RACK1_HUMAN	1.64027e+06	172	20.6455			P63244	RACK1	Receptor of activated protein C kinase 1	RACK1_HUMAN	2739473	129	21.3855
P67936	TPM4	Tropomyosin alpha-4 chain	TPM4_HUMAN	1.6802e+06	167	20.6802			P67936	TPM4	Tropomyosin alpha-4 chain	TPM4_HUMAN	690769	229	19.3978
P68104;Q5VTE0	EEF1A1;EEF1A1P5	Elongation factor 1-alpha 1;Putative elongation factor 1-alpha-like 3	EF1A1_HUMAN;EF1A3_HUMAN	100950776	1	26.5891			P68104;Q5VTE0	EEF1A1;EEF1A1P5	Elongation factor 1-alpha 1;Putative elongation factor 1-alpha-like 3	EF1A1_HUMAN;EF1A3_HUMAN	119472416	2	26.8321
P68363	TUBA1B	Tubulin alpha-1B chain	TBA1B_HUMAN	3735558	83	21.8329			P68363	TUBA1B	Tubulin alpha-1B chain	TBA1B_HUMAN	15006844	17	23.8391
P68371	TUBB4B	Tubulin beta-4B chain	TBB4B_HUMAN	8892679	29	23.0842			P68371	TUBB4B	Tubulin beta-4B chain	TBB4B_HUMAN	20410010	12	24.2828
P68431;P84243;Q16695;Q6NXT2;Q71DI3	HIST1H3A;H3F3A;HIST3H3;H3F3C;HIST2H3A	Histone H3.1;Histone H3.3;Histone H3.1t;Histone H3.3C;Histone H3.2	H31_HUMAN;H33_HUMAN;H31T_HUMAN;H3C_HUMAN;H32_HUMAN	12328006	19	23.5554			P68431;P84243;Q16695;Q6NXT2;Q71DI3	HIST1H3A;H3F3A;HIST3H3;H3F3C;HIST2H3A	Histone H3.1;Histone H3.3;Histone H3.1t;Histone H3.3C;Histone H3.2	H31_HUMAN;H33_HUMAN;H31T_HUMAN;H3C_HUMAN;H32_HUMAN	21978782	11	24.3896
P78417	GSTO1	Glutathione S-transferase omega-1	GSTO1_HUMAN	1.92916e+06	149	20.8795			P78417	GSTO1	Glutathione S-transferase omega-1	GSTO1_HUMAN	1.53209e+06	192	20.5471
P84098	RPL19	60S ribosomal protein L19	RL19_HUMAN	4.48261e+06	66	22.0959			P84098	RPL19	60S ribosomal protein L19	RL19_HUMAN	5198106	71	22.3096
P84103	SRSF3	Serine/arginine-rich splicing factor 3	SRSF3_HUMAN	6067409	49	22.5326			P84103	SRSF3	Serine/arginine-rich splicing factor 3	SRSF3_HUMAN	2.29941e+06	152	21.1328
Q00839	HNRNPU	Heterogeneous nuclear ribonucleoprotein U	HNRPU_HUMAN	3.69724e+06	84	21.818			Q00839	HNRNPU	Heterogeneous nuclear ribonucleoprotein U	HNRPU_HUMAN	3.89343e+06	97	21.8926
Q01082	SPTBN1	Spectrin beta chain, non-erythrocytic 1	SPTB2_HUMAN	1.11092e+06	204	20.0833			Q01082	SPTBN1	Spectrin beta chain, non-erythrocytic 1	SPTB2_HUMAN	1.0317e+06	220	19.9766
Q01469	FABP5	Fatty acid-binding protein 5	FABP5_HUMAN	1.60017e+06	175	20.6098			Q01469	FABP5	Fatty acid-binding protein 5	FABP5_HUMAN	2.39441e+06	147	21.1912
Q01518	CAP1	Adenylyl cyclase-associated protein 1	CAP1_HUMAN	1.96039e+06	147	20.9027			Q01518	CAP1	Adenylyl cyclase-associated protein 1	CAP1_HUMAN	1902267	173	20.8593
Q02878	RPL6	60S ribosomal protein L6	RL6_HUMAN	2761128	117	21.3968			Q02878	RPL6	60S ribosomal protein L6	RL6_HUMAN	2489344	139	21.2473
Q04637	EIF4G1	Eukaryotic translation initiation factor 4 gamma 1	IF4G1_HUMAN	862288	216	19.7178			Q04637	EIF4G1	Eukaryotic translation initiation factor 4 gamma 1	IF4G1_HUMAN	1.7613e+06	183	20.7482
Q06830	PRDX1	Peroxiredoxin-1	PRDX1_HUMAN	7.21888e+06	39	22.7833			Q06830	PRDX1	Peroxiredoxin-1	PRDX1_HUMAN	7717590	40	22.8797
Q08211	DHX9	ATP-dependent RNA helicase A	DHX9_HUMAN	1.47339e+06	182	20.4907			Q08211	DHX9	ATP-dependent RNA helicase A	DHX9_HUMAN	2.42643e+06	141	21.2104
Q09666	AHNAK	Neuroblast differentiation-associated protein AHNAK	AHNK_HUMAN	4430955	71	22.0792			Q09666	AHNAK	Neuroblast differentiation-associated protein AHNAK	AHNK_HUMAN	4974876	75	22.2462
Q12906	ILF3	Interleukin enhancer-binding factor 3	ILF3_HUMAN	526469	226	19.006			Q12906	ILF3	Interleukin enhancer-binding factor 3	ILF3_HUMAN	1795586	180	20.776
Q13247	SRSF6	Serine/arginine-rich splicing factor 6	SRSF6_HUMAN	3.78036e+06	80	21.8501			Q13247	SRSF6	Serine/arginine-rich splicing factor 6	SRSF6_HUMAN	4778758	80	22.1882
Q13283	G3BP1	Ras GTPase-activating protein-binding protein 1	G3BP1_HUMAN	3517369	91	21.7461			Q13283	G3BP1	Ras GTPase-activating protein-binding protein 1	G3BP1_HUMAN	3.96392e+06	94	21.9185
Q14103	HNRNPD	Heterogeneous nuclear ribonucleoprotein D0	HNRPD_HUMAN	3.04298e+06	103	21.5371			Q14103	HNRNPD	Heterogeneous nuclear ribonucleoprotein D0	HNRPD_HUMAN	3558911	106	21.763
Q14847	LASP1	LIM and SH3 domain protein 1	LASP1_HUMAN	4.71254e+06	62	22.1681			Q14847	LASP1	LIM and SH3 domain protein 1	LASP1_HUMAN	5.37438e+06	65	22.3577
Q14974	KPNB1	Importin subunit beta-1	IMB1_HUMAN	1.67296e+06	170	20.674			Q14974	KPNB1	Importin subunit beta-1	IMB1_HUMAN	3.70496e+06	103	21.821
Q15149	PLEC	Plectin	PLEC_HUMAN	2.54773e+06	123	21.2808			Q15149	PLEC	Plectin	PLEC_HUMAN	2.53547e+06	137	21.2738
Q15185	PTGES3	Prostaglandin E synthase 3	TEBP_HUMAN	2.10059e+06	141	21.0024			Q15185	PTGES3	Prostaglandin E synthase 3	TEBP_HUMAN	3.74563e+06	102	21.8368
Q15233	NONO	Non-POU domain-containing octamer-binding protein	NONO_HUMAN	2.4551e+06	132	21.2273			Q15233	NONO	Non-POU domain-containing octamer-binding protein	NONO_HUMAN	2.64681e+06	133	21.3358
Q15365	PCBP1	Poly(rC)-binding protein 1	PCBP1_HUMAN	2.77597e+06	116	21.4046			Q15365	PCBP1	Poly(rC)-binding protein 1	PCBP1_HUMAN	2.81359e+06	127	21.424
Q15366	PCBP2	Poly(rC)-binding protein 2	PCBP2_HUMAN	3745078	82	21.8366			Q15366	PCBP2	Poly(rC)-binding protein 2	PCBP2_HUMAN	1.21312e+06	205	20.2103
Q15417	CNN3	Calponin-3	CNN3_HUMAN	1.47814e+06	180	20.4953			Q15417	CNN3	Calponin-3	CNN3_HUMAN	1.56303e+06	191	20.5759
Q15691	MAPRE1	Microtubule-associated protein RP/EB family member 1	MARE1_HUMAN	1.27866e+06	189	20.2862			Q15691	MAPRE1	Microtubule-associated protein RP/EB family member 1	MARE1_HUMAN	1.48666e+06	198	20.5036
Q16629	SRSF7	Serine/arginine-rich splicing factor 7	SRSF7_HUMAN	16033072	15	23.9345			Q16629	SRSF7	Serine/arginine-rich splicing factor 7	SRSF7_HUMAN	581012	230	19.1482
Q92598	HSPH1	Heat shock protein 105 kDa	HS105_HUMAN	1196143	199	20.19			Q92598	HSPH1	Heat shock protein 105 kDa	HS105_HUMAN	1609792	189	20.6184
Q92841	DDX17	Probable ATP-dependent RNA helicase DDX17	DDX17_HUMAN	1.85121e+06	157	20.82			Q92841	DDX17	Probable ATP-dependent RNA helicase DDX17	DDX17_HUMAN	4.00942e+06	91	21.935
Q92945	KHSRP	Far upstream element-binding protein 2	FUBP2_HUMAN	601538	222	19.1983			Q92945	KHSRP	Far upstream element-binding protein 2	FUBP2_HUMAN	2.079e+06	162	20.9875
Q99497	PARK7	Protein/nucleic acid deglycase DJ-1	PARK7_HUMAN	2.50429e+06	125	21.256			Q99497	PARK7	Protein/nucleic acid deglycase DJ-1	PARK7_HUMAN	3752900	101	21.8396
Q9BRA2	TXNDC17	Thioredoxin domain-containing protein 17	TXD17_HUMAN	1.01087e+06	209	19.9472			Q9BRA2	TXNDC17	Thioredoxin domain-containing protein 17	TXD17_HUMAN	1.20153e+06	207	20.1964
Q9HB71	CACYBP	Calcyclin-binding protein	CYBP_HUMAN	2.26204e+06	137	21.1092			Q9HB71	CACYBP	Calcyclin-binding protein	CYBP_HUMAN	1.36343e+06	201	20.3788
Q9NR30	DDX21	Nucleolar RNA helicase 2	DDX21_HUMAN	289624	231	18.1438			Q9NR30	DDX21	Nucleolar RNA helicase 2	DDX21_HUMAN	936901	224	19.8375
Q9UQ80	PA2G4	Proliferation-associated protein 2G4	PA2G4_HUMAN	2.88587e+06	110	21.4606			Q9UQ80	PA2G4	Proliferation-associated protein 2G4	PA2G4_HUMAN	2.99481e+06	122	21.514
Q9Y230	RUVBL2	RuvB-like 2	RUVB2_HUMAN	855053	217	19.7057			Q9Y230	RUVBL2	RuvB-like 2	RUVB2_HUMAN	1.20724e+06	206	20.2033
Q9Y266	NUDC	Nuclear migration protein nudC	NUDC_HUMAN	1.47496e+06	181	20.4922			Q9Y266	NUDC	Nuclear migration protein nudC	NUDC_HUMAN	461266	231	18.8152
Q9Y3A5	SBDS	Ribosome maturation protein SBDS	SBDS_HUMAN	456772	228	18.8011			Q9Y3A5	SBDS	Ribosome maturation protein SBDS	SBDS_HUMAN	906114	226	19.7893
Q9Y490	TLN1	Talin-1	TLN1_HUMAN	2.48203e+06	126	21.2431			Q9Y490	TLN1	Talin-1	TLN1_HUMAN	1.17834e+06	209	20.1683

## Sheet: Figure 3b
PG.ProteinAccessions	PG.Genes	PG.ProteinDescriptions	PG.ProteinNames	[9] JHU_LM2_PACC_E4_10_15min_1.raw.PG.Quantity	rank					PG.ProteinAccessions	PG.Genes	PG.ProteinDescriptions	PG.ProteinNames	[18] JHU_LM2_PACC_E4_10_15min.raw.PG.Quantity	rank
A0AVT1	UBA6	Ubiquitin-like modifier-activating enzyme 6	UBA6_HUMAN	9028.1	845	13.1402				A0AVT1	UBA6	Ubiquitin-like modifier-activating enzyme 6	UBA6_HUMAN	261.333	927	8.02975	0.855282
A0FGR8	ESYT2	Extended synaptotagmin-2	ESYT2_HUMAN	7561.68	930	12.8845				A0FGR8	ESYT2	Extended synaptotagmin-2	ESYT2_HUMAN	337.681	807	8.39952
E9PAV3;Q13765	NACA	Nascent polypeptide-associated complex subunit alpha, muscle-specific form;Nascent polypeptide-associated complex subunit alpha	NACAM_HUMAN;NACA_HUMAN	27226.4	345	14.7327				E9PAV3;Q13765	NACA	Nascent polypeptide-associated complex subunit alpha, muscle-specific form;Nascent polypeptide-associated complex subunit alpha	NACAM_HUMAN;NACA_HUMAN	683.776	462	9.41738
G2XKQ0;P63165	SUMO1P1;SUMO1	Small ubiquitin-related modifier 5;Small ubiquitin-related modifier 1	SUMO5_HUMAN;SUMO1_HUMAN	12862.6	672	13.6509				G2XKQ0;P63165	SUMO1P1;SUMO1	Small ubiquitin-related modifier 5;Small ubiquitin-related modifier 1	SUMO5_HUMAN;SUMO1_HUMAN	569.672	554	9.15399
O00139	KIF2A	Kinesin-like protein KIF2A	KIF2A_HUMAN	8488.51	869	13.0513				O00139	KIF2A	Kinesin-like protein KIF2A	KIF2A_HUMAN	218.112	997	7.76893
O00148	DDX39A	ATP-dependent RNA helicase DDX39A	DX39A_HUMAN	44131.5	213	15.4295				O00148	DDX39A	ATP-dependent RNA helicase DDX39A	DX39A_HUMAN	992.261	326	9.95458
O00151	PDLIM1	PDZ and LIM domain protein 1	PDLI1_HUMAN	11171.1	749	13.4475				O00151	PDLIM1	PDZ and LIM domain protein 1	PDLI1_HUMAN	379.2	758	8.56682
O00154	ACOT7	Cytosolic acyl coenzyme A thioester hydrolase	BACH_HUMAN	19517.8	465	14.2525				O00154	ACOT7	Cytosolic acyl coenzyme A thioester hydrolase	BACH_HUMAN	787.969	402	9.622
O00159	MYO1C	Unconventional myosin-Ic	MYO1C_HUMAN	13244.5	656	13.6931				O00159	MYO1C	Unconventional myosin-Ic	MYO1C_HUMAN	642.45	492	9.32744
O00231	PSMD11	26S proteasome non-ATPase regulatory subunit 11	PSD11_HUMAN	18711.4	490	14.1916				O00231	PSMD11	26S proteasome non-ATPase regulatory subunit 11	PSD11_HUMAN	691.47	456	9.43352
O00233	PSMD9	26S proteasome non-ATPase regulatory subunit 9	PSMD9_HUMAN	23248.1	388	14.5048				O00233	PSMD9	26S proteasome non-ATPase regulatory subunit 9	PSMD9_HUMAN	250.128	948	7.96652
O00244	ATOX1	Copper transport protein ATOX1	ATOX1_HUMAN	28009.2	338	14.7736				O00244	ATOX1	Copper transport protein ATOX1	ATOX1_HUMAN	745.299	421	9.54167
O00299	CLIC1	Chloride intracellular channel protein 1	CLIC1_HUMAN	533802	10	19.0259				O00299	CLIC1	Chloride intracellular channel protein 1	CLIC1_HUMAN	8102.85	29	12.9842
O00303	EIF3F	Eukaryotic translation initiation factor 3 subunit F	EIF3F_HUMAN	11600.7	727	13.5019				O00303	EIF3F	Eukaryotic translation initiation factor 3 subunit F	EIF3F_HUMAN	306.349	856	8.25903
O00401	WASL	Neural Wiskott-Aldrich syndrome protein	WASL_HUMAN	2452.61	1176	11.2601				O00401	WASL	Neural Wiskott-Aldrich syndrome protein	WASL_HUMAN	127.431	1134	6.99357
O00410	IPO5	Importin-5	IPO5_HUMAN	19632	461	14.2609				O00410	IPO5	Importin-5	IPO5_HUMAN	627.761	505	9.29407
O00487	PSMD14	26S proteasome non-ATPase regulatory subunit 14	PSDE_HUMAN	21829.5	418	14.414				O00487	PSMD14	26S proteasome non-ATPase regulatory subunit 14	PSDE_HUMAN	631.627	502	9.30293
O00541	PES1	Pescadillo homolog	PESC_HUMAN	4439.73	1116	12.1163				O00541	PES1	Pescadillo homolog	PESC_HUMAN	142.804	1114	7.1579
O00567	NOP56	Nucleolar protein 56	NOP56_HUMAN	5788.23	1040	12.4989				O00567	NOP56	Nucleolar protein 56	NOP56_HUMAN	184.471	1056	7.52725
O00571	DDX3X	ATP-dependent RNA helicase DDX3X	DDX3X_HUMAN	24362.2	371	14.5724				O00571	DDX3X	ATP-dependent RNA helicase DDX3X	DDX3X_HUMAN	599.839	533	9.22843
O00592	PODXL	Podocalyxin	PODXL_HUMAN	20183.6	452	14.3009				O00592	PODXL	Podocalyxin	PODXL_HUMAN	694.577	455	9.43999
O00622	CYR61	Protein CYR61	CYR61_HUMAN	20258	447	14.3062				O00622	CYR61	Protein CYR61	CYR61_HUMAN	624.115	509	9.28567
O14737	PDCD5	Programmed cell death protein 5	PDCD5_HUMAN	7498.87	940	12.8725				O14737	PDCD5	Programmed cell death protein 5	PDCD5_HUMAN	149.551	1101	7.22449
O14744	PRMT5	Protein arginine N-methyltransferase 5	ANM5_HUMAN	17447.2	523	14.0907				O14744	PRMT5	Protein arginine N-methyltransferase 5	ANM5_HUMAN	536.656	588	9.06785
O14745	SLC9A3R1	Na(+)/H(+) exchange regulatory cofactor NHE-RF1	NHRF1_HUMAN	7218.28	952	12.8174				O14745	SLC9A3R1	Na(+)/H(+) exchange regulatory cofactor NHE-RF1	NHRF1_HUMAN	371.332	765	8.53657
O14776	TCERG1	Transcription elongation regulator 1	TCRG1_HUMAN	4616.76	1108	12.1727				O14776	TCERG1	Transcription elongation regulator 1	TCRG1_HUMAN	158.068	1091	7.3044
O14786	NRP1	Neuropilin-1	NRP1_HUMAN	8390.5	877	13.0345				O14786	NRP1	Neuropilin-1	NRP1_HUMAN	514.263	610	9.00636
O14818	PSMA7	Proteasome subunit alpha type-7	PSA7_HUMAN	34449	277	15.0722				O14818	PSMA7	Proteasome subunit alpha type-7	PSA7_HUMAN	1364.22	230	10.4139
O14950;P19105	MYL12B;MYL12A	Myosin regulatory light chain 12B;Myosin regulatory light chain 12A	ML12B_HUMAN;ML12A_HUMAN	28425.5	334	14.7949				O14950;P19105	MYL12B;MYL12A	Myosin regulatory light chain 12B;Myosin regulatory light chain 12A	ML12B_HUMAN;ML12A_HUMAN	484.477	635	8.92029
O14964	HGS	Hepatocyte growth factor-regulated tyrosine kinase substrate	HGS_HUMAN	6506.99	991	12.6678				O14964	HGS	Hepatocyte growth factor-regulated tyrosine kinase substrate	HGS_HUMAN	81.1348	1176	6.34225
O14974	PPP1R12A	Protein phosphatase 1 regulatory subunit 12A	MYPT1_HUMAN	5413.79	1064	12.4024				O14974	PPP1R12A	Protein phosphatase 1 regulatory subunit 12A	MYPT1_HUMAN	201.349	1028	7.65355
O14979	HNRNPDL	Heterogeneous nuclear ribonucleoprotein D-like	HNRDL_HUMAN	27178.9	346	14.7302				O14979	HNRNPDL	Heterogeneous nuclear ribonucleoprotein D-like	HNRDL_HUMAN	568.92	556	9.15208
O14980	XPO1	Exportin-1	XPO1_HUMAN	7611.18	927	12.8939				O14980	XPO1	Exportin-1	XPO1_HUMAN	291.965	876	8.18965
O15042	U2SURP	U2 snRNP-associated SURP motif-containing protein	SR140_HUMAN	3008.08	1159	11.5546				O15042	U2SURP	U2 snRNP-associated SURP motif-containing protein	SR140_HUMAN	1052.21	306	10.0392
O15143	ARPC1B	Actin-related protein 2/3 complex subunit 1B	ARC1B_HUMAN	20855.6	435	14.3481				O15143	ARPC1B	Actin-related protein 2/3 complex subunit 1B	ARC1B_HUMAN	854.437	373	9.73883
O15144	ARPC2	Actin-related protein 2/3 complex subunit 2	ARPC2_HUMAN	23044.2	390	14.4921				O15144	ARPC2	Actin-related protein 2/3 complex subunit 2	ARPC2_HUMAN	672.971	467	9.3944
O15145	ARPC3	Actin-related protein 2/3 complex subunit 3	ARPC3_HUMAN	15206	575	13.8924				O15145	ARPC3	Actin-related protein 2/3 complex subunit 3	ARPC3_HUMAN	585.851	542	9.19439
O15173	PGRMC2	Membrane-associated progesterone receptor component 2	PGRC2_HUMAN	18860.1	486	14.2031				O15173	PGRMC2	Membrane-associated progesterone receptor component 2	PGRC2_HUMAN	673.533	465	9.39561
O15212	PFDN6	Prefoldin subunit 6	PFD6_HUMAN	10069.7	799	13.2977				O15212	PFDN6	Prefoldin subunit 6	PFD6_HUMAN	253.16	938	7.98391
O15231	ZNF185	Zinc finger protein 185	ZN185_HUMAN	7863.4	911	12.9409				O15231	ZNF185	Zinc finger protein 185	ZN185_HUMAN	362.987	773	8.50377
O15294	OGT	UDP-N-acetylglucosamine--peptide N-acetylglucosaminyltransferase 110 kDa subunit	OGT1_HUMAN	2722.12	1169	11.4105				O15294	OGT	UDP-N-acetylglucosamine--peptide N-acetylglucosaminyltransferase 110 kDa subunit	OGT1_HUMAN	110.373	1156	6.78624
O15347	HMGB3	High mobility group protein B3	HMGB3_HUMAN	13083.7	662	13.6755				O15347	HMGB3	High mobility group protein B3	HMGB3_HUMAN	436.161	691	8.76872
O15355	PPM1G	Protein phosphatase 1G	PPM1G_HUMAN	12237.5	707	13.579				O15355	PPM1G	Protein phosphatase 1G	PPM1G_HUMAN	531.768	592	9.05465
O15371	EIF3D	Eukaryotic translation initiation factor 3 subunit D	EIF3D_HUMAN	25945.8	360	14.6632				O15371	EIF3D	Eukaryotic translation initiation factor 3 subunit D	EIF3D_HUMAN	720.557	437	9.49297
O15372	EIF3H	Eukaryotic translation initiation factor 3 subunit H	EIF3H_HUMAN	10910.7	761	13.4135				O15372	EIF3H	Eukaryotic translation initiation factor 3 subunit H	EIF3H_HUMAN	456.585	671	8.83474
O15511	ARPC5	Actin-related protein 2/3 complex subunit 5	ARPC5_HUMAN	23545.8	382	14.5232				O15511	ARPC5	Actin-related protein 2/3 complex subunit 5	ARPC5_HUMAN	1379.69	228	10.4301
O43143	DHX15	Pre-mRNA-splicing factor ATP-dependent RNA helicase DHX15	DHX15_HUMAN	16070.9	553	13.9722				O43143	DHX15	Pre-mRNA-splicing factor ATP-dependent RNA helicase DHX15	DHX15_HUMAN	513.079	611	9.00304
O43172	PRPF4	U4/U6 small nuclear ribonucleoprotein Prp4	PRP4_HUMAN	6012.75	1017	12.5538				O43172	PRPF4	U4/U6 small nuclear ribonucleoprotein Prp4	PRP4_HUMAN	171.848	1075	7.42499
O43242	PSMD3	26S proteasome non-ATPase regulatory subunit 3	PSMD3_HUMAN	10578.1	779	13.3688				O43242	PSMD3	26S proteasome non-ATPase regulatory subunit 3	PSMD3_HUMAN	232.29	973	7.85979
O43290	SART1	U4/U6.U5 tri-snRNP-associated protein 1	SNUT1_HUMAN	4803.67	1099	12.2299				O43290	SART1	U4/U6.U5 tri-snRNP-associated protein 1	SNUT1_HUMAN	103.44	1160	6.69265
O43390	HNRNPR	Heterogeneous nuclear ribonucleoprotein R	HNRPR_HUMAN	12211.2	709	13.5759				O43390	HNRNPR	Heterogeneous nuclear ribonucleoprotein R	HNRPR_HUMAN	440.403	689	8.78268
O43395	PRPF3	U4/U6 small nuclear ribonucleoprotein Prp3	PRPF3_HUMAN	6150.58	1008	12.5865				O43395	PRPF3	U4/U6 small nuclear ribonucleoprotein Prp3	PRPF3_HUMAN	252.664	941	7.98108
O43399	TPD52L2	Tumor protein D54	TPD54_HUMAN	13251.6	655	13.6939				O43399	TPD52L2	Tumor protein D54	TPD54_HUMAN	303.054	862	8.24343
O43447	PPIH	Peptidyl-prolyl cis-trans isomerase H	PPIH_HUMAN	3785.22	1138	11.8862				O43447	PPIH	Peptidyl-prolyl cis-trans isomerase H	PPIH_HUMAN	54.6363	1184	5.77179
O43583	DENR	Density-regulated protein	DENR_HUMAN	16966.7	537	14.0504				O43583	DENR	Density-regulated protein	DENR_HUMAN	335.857	810	8.39171
O43617	TRAPPC3	Trafficking protein particle complex subunit 3	TPPC3_HUMAN	8900.45	850	13.1197				O43617	TRAPPC3	Trafficking protein particle complex subunit 3	TPPC3_HUMAN	194.032	1039	7.60015
O43670	ZNF207	BUB3-interacting and GLEBS motif-containing protein ZNF207	ZN207_HUMAN	6658.73	983	12.701				O43670	ZNF207	BUB3-interacting and GLEBS motif-containing protein ZNF207	ZN207_HUMAN	281.753	891	8.13829
O43684	BUB3	Mitotic checkpoint protein BUB3	BUB3_HUMAN	15736	565	13.9418				O43684	BUB3	Mitotic checkpoint protein BUB3	BUB3_HUMAN	551.194	573	9.10642
O43707	ACTN4	Alpha-actinin-4	ACTN4_HUMAN	46103	204	15.4926				O43707	ACTN4	Alpha-actinin-4	ACTN4_HUMAN	1072.55	302	10.0668
O43765	SGTA	Small glutamine-rich tetratricopeptide repeat-containing protein alpha	SGTA_HUMAN	7536.82	932	12.8797				O43765	SGTA	Small glutamine-rich tetratricopeptide repeat-containing protein alpha	SGTA_HUMAN	303.867	860	8.2473
O43809	NUDT21	Cleavage and polyadenylation specificity factor subunit 5	CPSF5_HUMAN	7829.37	913	12.9347				O43809	NUDT21	Cleavage and polyadenylation specificity factor subunit 5	CPSF5_HUMAN	123.807	1142	6.95195
O43852	CALU	Calumenin	CALU_HUMAN	34657.3	274	15.0809				O43852	CALU	Calumenin	CALU_HUMAN	1343.44	236	10.3917
O60443	GSDME	Gasdermin-E	GSDME_HUMAN	7173.51	955	12.8085				O60443	GSDME	Gasdermin-E	GSDME_HUMAN	130.841	1130	7.03167
O60488	ACSL4	Long-chain-fatty-acid--CoA ligase 4	ACSL4_HUMAN	11553.4	729	13.496				O60488	ACSL4	Long-chain-fatty-acid--CoA ligase 4	ACSL4_HUMAN	149.228	1103	7.22138
O60493	SNX3	Sorting nexin-3	SNX3_HUMAN	7391.73	947	12.8517				O60493	SNX3	Sorting nexin-3	SNX3_HUMAN	75.3385	1178	6.23532
O60506	SYNCRIP	Heterogeneous nuclear ribonucleoprotein Q	HNRPQ_HUMAN	27444.3	343	14.7442				O60506	SYNCRIP	Heterogeneous nuclear ribonucleoprotein Q	HNRPQ_HUMAN	979.089	330	9.9353
O60664	PLIN3	Perilipin-3	PLIN3_HUMAN	14210.2	616	13.7946				O60664	PLIN3	Perilipin-3	PLIN3_HUMAN	346.255	798	8.43569
O60701	UGDH	UDP-glucose 6-dehydrogenase	UGDH_HUMAN	6097.51	1014	12.574				O60701	UGDH	UDP-glucose 6-dehydrogenase	UGDH_HUMAN	454.379	674	8.82775
O60749	SNX2	Sorting nexin-2	SNX2_HUMAN	2072.07	1178	11.0169				O60749	SNX2	Sorting nexin-2	SNX2_HUMAN	207.766	1015	7.69882
O60814;P57053;P58876;P62807;Q5QNW6;Q93079;Q99877;Q99879;Q99880	HIST1H2BK;H2BFS;HIST1H2BD;HIST1H2BC;HIST2H2BF;HIST1H2BH;HIST1H2BN;HIST1H2BM;HIST1H2BL	Histone H2B type 1-K;Histone H2B type F-S;Histone H2B type 1-D;Histone H2B type 1-C/E/F/G/I;Histone H2B type 2-F;Histone H2B type 1-H;Histone H2B type 1-N;Histone H2B type 1-M;Histone H2B type 1-L	H2B1K_HUMAN;H2BFS_HUMAN;H2B1D_HUMAN;H2B1C_HUMAN;H2B2F_HUMAN;H2B1H_HUMAN;H2B1N_HUMAN;H2B1M_HUMAN;H2B1L_HUMAN	488893	11	18.8992				O60814;P57053;P58876;P62807;Q5QNW6;Q93079;Q99877;Q99879;Q99880	HIST1H2BK;H2BFS;HIST1H2BD;HIST1H2BC;HIST2H2BF;HIST1H2BH;HIST1H2BN;HIST1H2BM;HIST1H2BL	Histone H2B type 1-K;Histone H2B type F-S;Histone H2B type 1-D;Histone H2B type 1-C/E/F/G/I;Histone H2B type 2-F;Histone H2B type 1-H;Histone H2B type 1-N;Histone H2B type 1-M;Histone H2B type 1-L	H2B1K_HUMAN;H2BFS_HUMAN;H2B1D_HUMAN;H2B1C_HUMAN;H2B2F_HUMAN;H2B1H_HUMAN;H2B1N_HUMAN;H2B1M_HUMAN;H2B1L_HUMAN	14483.8	14	13.8221
O60828	PQBP1	Polyglutamine-binding protein 1	PQBP1_HUMAN	18173.5	508	14.1495				O60828	PQBP1	Polyglutamine-binding protein 1	PQBP1_HUMAN	210.22	1006	7.71576
O60832	DKC1	H/ACA ribonucleoprotein complex subunit DKC1	DKC1_HUMAN	8363.99	883	13.03				O60832	DKC1	H/ACA ribonucleoprotein complex subunit DKC1	DKC1_HUMAN	270.513	910	8.07955
O60841	EIF5B	Eukaryotic translation initiation factor 5B	IF2P_HUMAN	9737.35	807	13.2493				O60841	EIF5B	Eukaryotic translation initiation factor 5B	IF2P_HUMAN	588.854	540	9.20177
O60869	EDF1	Endothelial differentiation-related factor 1	EDF1_HUMAN	21425.3	427	14.387				O60869	EDF1	Endothelial differentiation-related factor 1	EDF1_HUMAN	514.588	609	9.00727
O60884	DNAJA2	DnaJ homolog subfamily A member 2	DNJA2_HUMAN	9889.23	805	13.2716				O60884	DNAJA2	DnaJ homolog subfamily A member 2	DNJA2_HUMAN	610.943	521	9.25489
O60925	PFDN1	Prefoldin subunit 1	PFD1_HUMAN	9575.32	815	13.2251				O60925	PFDN1	Prefoldin subunit 1	PFD1_HUMAN	336.308	808	8.39364
O75083	WDR1	WD repeat-containing protein 1	WDR1_HUMAN	73687.6	115	16.1691				O75083	WDR1	WD repeat-containing protein 1	WDR1_HUMAN	2038.5	147	10.9933
O75131	CPNE3	Copine-3	CPNE3_HUMAN	9280.92	830	13.1801				O75131	CPNE3	Copine-3	CPNE3_HUMAN	308.058	851	8.26706
O75153	CLUH	Clustered mitochondria protein homolog	CLU_HUMAN	4081.08	1133	11.9947				O75153	CLUH	Clustered mitochondria protein homolog	CLU_HUMAN	141.235	1117	7.14196
O75312	ZPR1	Zinc finger protein ZPR1	ZPR1_HUMAN	6053.18	1016	12.5635				O75312	ZPR1	Zinc finger protein ZPR1	ZPR1_HUMAN	229.03	979	7.83939
O75347	TBCA	Tubulin-specific chaperone A	TBCA_HUMAN	43219	225	15.3994				O75347	TBCA	Tubulin-specific chaperone A	TBCA_HUMAN	1358.83	232	10.4081
O75367	H2AFY	Core histone macro-H2A.1	H2AY_HUMAN	35481.6	265	15.1148				O75367	H2AFY	Core histone macro-H2A.1	H2AY_HUMAN	823.362	385	9.68538
O75368	SH3BGRL	SH3 domain-binding glutamic acid-rich-like protein	SH3L1_HUMAN	10704	768	13.3859				O75368	SH3BGRL	SH3 domain-binding glutamic acid-rich-like protein	SH3L1_HUMAN	460.625	663	8.84745
O75369	FLNB	Filamin-B	FLNB_HUMAN	129384	57	16.9813				O75369	FLNB	Filamin-B	FLNB_HUMAN	3915.04	64	11.9348
O75390	CS	Citrate synthase, mitochondrial	CISY_HUMAN	21893.6	416	14.4182				O75390	CS	Citrate synthase, mitochondrial	CISY_HUMAN	426.143	701	8.73519
O75400	PRPF40A	Pre-mRNA-processing factor 40 homolog A	PR40A_HUMAN	6840.3	973	12.7398				O75400	PRPF40A	Pre-mRNA-processing factor 40 homolog A	PR40A_HUMAN	541.582	581	9.08104
O75477	ERLIN1	Erlin-1	ERLN1_HUMAN	1546.05	1183	10.5944				O75477	ERLIN1	Erlin-1	ERLN1_HUMAN	232.424	972	7.86062
O75533	SF3B1	Splicing factor 3B subunit 1	SF3B1_HUMAN	7169.9	956	12.8077				O75533	SF3B1	Splicing factor 3B subunit 1	SF3B1_HUMAN	299.667	868	8.22721
O75534	CSDE1	Cold shock domain-containing protein E1	CSDE1_HUMAN	14421.5	609	13.8159				O75534	CSDE1	Cold shock domain-containing protein E1	CSDE1_HUMAN	481.333	638	8.91089
O75643	SNRNP200	U5 small nuclear ribonucleoprotein 200 kDa helicase	U520_HUMAN	8158.22	893	12.994				O75643	SNRNP200	U5 small nuclear ribonucleoprotein 200 kDa helicase	U520_HUMAN	124.162	1139	6.95608
O75663	TIPRL	TIP41-like protein	TIPRL_HUMAN	59974.2	151	15.8721				O75663	TIPRL	TIP41-like protein	TIPRL_HUMAN	2659.24	97	11.3768
O75718	CRTAP	Cartilage-associated protein	CRTAP_HUMAN	3993.54	1134	11.9635				O75718	CRTAP	Cartilage-associated protein	CRTAP_HUMAN	82.2748	1175	6.36238
O75821	EIF3G	Eukaryotic translation initiation factor 3 subunit G	EIF3G_HUMAN	18300.3	506	14.1596				O75821	EIF3G	Eukaryotic translation initiation factor 3 subunit G	EIF3G_HUMAN	459.939	664	8.8453
O75822	EIF3J	Eukaryotic translation initiation factor 3 subunit J	EIF3J_HUMAN	15456.9	571	13.916				O75822	EIF3J	Eukaryotic translation initiation factor 3 subunit J	EIF3J_HUMAN	503.147	627	8.97484
O75874	IDH1	Isocitrate dehydrogenase [NADP] cytoplasmic	IDHC_HUMAN	10378.2	789	13.3413				O75874	IDH1	Isocitrate dehydrogenase [NADP] cytoplasmic	IDHC_HUMAN	441.998	685	8.7879
O75947	ATP5PD	ATP synthase subunit d, mitochondrial	ATP5H_HUMAN	5958.28	1026	12.5407				O75947	ATP5PD	ATP synthase subunit d, mitochondrial	ATP5H_HUMAN	383.765	753	8.58408
O76003	GLRX3	Glutaredoxin-3	GLRX3_HUMAN	13670.8	636	13.7388				O76003	GLRX3	Glutaredoxin-3	GLRX3_HUMAN	725.429	435	9.50269
O76021	RSL1D1	Ribosomal L1 domain-containing protein 1	RL1D1_HUMAN	9127.6	841	13.156				O76021	RSL1D1	Ribosomal L1 domain-containing protein 1	RL1D1_HUMAN	444.149	681	8.7949
O76094	SRP72	Signal recognition particle subunit SRP72	SRP72_HUMAN	9605.25	812	13.2296				O76094	SRP72	Signal recognition particle subunit SRP72	SRP72_HUMAN	317.15	840	8.30902
O94760	DDAH1	N(G),N(G)-dimethylarginine dimethylaminohydrolase 1	DDAH1_HUMAN	5953.42	1027	12.5395				O94760	DDAH1	N(G),N(G)-dimethylarginine dimethylaminohydrolase 1	DDAH1_HUMAN	90.1642	1170	6.49448
O94776	MTA2	Metastasis-associated protein MTA2	MTA2_HUMAN	10450	785	13.3512				O94776	MTA2	Metastasis-associated protein MTA2	MTA2_HUMAN	298.883	871	8.22344
O94804	STK10	Serine/threonine-protein kinase 10	STK10_HUMAN	10090.1	798	13.3006				O94804	STK10	Serine/threonine-protein kinase 10	STK10_HUMAN	249.423	950	7.96245
O94826	TOMM70	Mitochondrial import receptor subunit TOM70	TOM70_HUMAN	5727.45	1044	12.4837				O94826	TOMM70	Mitochondrial import receptor subunit TOM70	TOM70_HUMAN	369.202	769	8.52827
O94979	SEC31A	Protein transport protein Sec31A	SC31A_HUMAN	8475.54	871	13.0491				O94979	SEC31A	Protein transport protein Sec31A	SC31A_HUMAN	555.392	569	9.11736
O95292	VAPB	Vesicle-associated membrane protein-associated protein B/C	VAPB_HUMAN	6422.59	995	12.6489				O95292	VAPB	Vesicle-associated membrane protein-associated protein B/C	VAPB_HUMAN	110.657	1154	6.78995
O95336	PGLS	6-phosphogluconolactonase	6PGL_HUMAN	8078.17	898	12.9798				O95336	PGLS	6-phosphogluconolactonase	6PGL_HUMAN	538.227	587	9.07207
O95340	PAPSS2	Bifunctional 3'-phosphoadenosine 5'-phosphosulfate synthase 2	PAPS2_HUMAN	3649.81	1142	11.8336				O95340	PAPSS2	Bifunctional 3'-phosphoadenosine 5'-phosphosulfate synthase 2	PAPS2_HUMAN	157.874	1092	7.30263
O95347	SMC2	Structural maintenance of chromosomes protein 2	SMC2_HUMAN	9211.37	836	13.1692				O95347	SMC2	Structural maintenance of chromosomes protein 2	SMC2_HUMAN	267.364	918	8.06266
O95373	IPO7	Importin-7	IPO7_HUMAN	22194	405	14.4379				O95373	IPO7	Importin-7	IPO7_HUMAN	667.09	473	9.38174
O95433	AHSA1	Activator of 90 kDa heat shock protein ATPase homolog 1	AHSA1_HUMAN	8867.41	852	13.1143				O95433	AHSA1	Activator of 90 kDa heat shock protein ATPase homolog 1	AHSA1_HUMAN	241.318	958	7.91479
O95747	OXSR1	Serine/threonine-protein kinase OSR1	OXSR1_HUMAN	5520.68	1057	12.4306				O95747	OXSR1	Serine/threonine-protein kinase OSR1	OXSR1_HUMAN	168.65	1079	7.39789
O95757	HSPA4L	Heat shock 70 kDa protein 4L	HS74L_HUMAN	11892.1	717	13.5377				O95757	HSPA4L	Heat shock 70 kDa protein 4L	HS74L_HUMAN	458.788	665	8.84168
O95777	LSM8	U6 snRNA-associated Sm-like protein LSm8	LSM8_HUMAN	22267.3	403	14.4426				O95777	LSM8	U6 snRNA-associated Sm-like protein LSm8	LSM8_HUMAN	1024.45	316	10.0006
O95782	AP2A1	AP-2 complex subunit alpha-1	AP2A1_HUMAN	41660.1	232	15.3464				O95782	AP2A1	AP-2 complex subunit alpha-1	AP2A1_HUMAN	256.917	930	8.00516
O95816	BAG2	BAG family molecular chaperone regulator 2	BAG2_HUMAN	19178.5	478	14.2272				O95816	BAG2	BAG family molecular chaperone regulator 2	BAG2_HUMAN	631.378	503	9.30236
O95817	BAG3	BAG family molecular chaperone regulator 3	BAG3_HUMAN	2564.56	1174	11.3245				O95817	BAG3	BAG family molecular chaperone regulator 3	BAG3_HUMAN	108.946	1157	6.76747
O95865	DDAH2	N(G),N(G)-dimethylarginine dimethylaminohydrolase 2	DDAH2_HUMAN	9071.1	843	13.1471				O95865	DDAH2	N(G),N(G)-dimethylarginine dimethylaminohydrolase 2	DDAH2_HUMAN	335.461	811	8.39
O95881	TXNDC12	Thioredoxin domain-containing protein 12	TXD12_HUMAN	10604.2	777	13.3724				O95881	TXNDC12	Thioredoxin domain-containing protein 12	TXD12_HUMAN	376.576	762	8.5568
O96005	CLPTM1	Cleft lip and palate transmembrane protein 1	CLPT1_HUMAN	4701.41	1104	12.1989				O96005	CLPTM1	Cleft lip and palate transmembrane protein 1	CLPT1_HUMAN	110.379	1155	6.78633
O96019	ACTL6A	Actin-like protein 6A	ACL6A_HUMAN	13361.5	648	13.7058				O96019	ACTL6A	Actin-like protein 6A	ACL6A_HUMAN	275.519	902	8.10601
P00338	LDHA	L-lactate dehydrogenase A chain	LDHA_HUMAN	708537	4	19.4345				P00338	LDHA	L-lactate dehydrogenase A chain	LDHA_HUMAN	25932.4	6	14.6625
P00367	GLUD1	Glutamate dehydrogenase 1, mitochondrial	DHE3_HUMAN	13459.4	645	13.7163				P00367	GLUD1	Glutamate dehydrogenase 1, mitochondrial	DHE3_HUMAN	509.324	616	8.99244
P00387	CYB5R3	NADH-cytochrome b5 reductase 3	NB5R3_HUMAN	5997.51	1019	12.5501				P00387	CYB5R3	NADH-cytochrome b5 reductase 3	NB5R3_HUMAN	165.665	1083	7.37212
P00441	SOD1	Superoxide dismutase [Cu-Zn]	SODC_HUMAN	7142.92	959	12.8023				P00441	SOD1	Superoxide dismutase [Cu-Zn]	SODC_HUMAN	288.738	881	8.17362
P00492	HPRT1	Hypoxanthine-guanine phosphoribosyltransferase	HPRT_HUMAN	10564.8	780	13.367				P00492	HPRT1	Hypoxanthine-guanine phosphoribosyltransferase	HPRT_HUMAN	263.571	923	8.04205
P00505	GOT2	Aspartate aminotransferase, mitochondrial	AATM_HUMAN	22012.7	408	14.426				P00505	GOT2	Aspartate aminotransferase, mitochondrial	AATM_HUMAN	666.073	476	9.37954
P00533	EGFR	Epidermal growth factor receptor	EGFR_HUMAN	4996.4	1089	12.2867				P00533	EGFR	Epidermal growth factor receptor	EGFR_HUMAN	183.681	1058	7.52106
P00558	PGK1	Phosphoglycerate kinase 1	PGK1_HUMAN	52374.8	173	15.6766				P00558	PGK1	Phosphoglycerate kinase 1	PGK1_HUMAN	1337.97	238	10.3858
P00568	AK1	Adenylate kinase isoenzyme 1	KAD1_HUMAN	15014.6	585	13.8741				P00568	AK1	Adenylate kinase isoenzyme 1	KAD1_HUMAN	622.597	512	9.28215
P01892	HLA-A	HLA class I histocompatibility antigen, A-2 alpha chain	1A02_HUMAN	31876.3	300	14.9602				P01892	HLA-A	HLA class I histocompatibility antigen, A-2 alpha chain	1A02_HUMAN	1278.43	248	10.3202
P02545	LMNA	Prelamin-A/C	LMNA_HUMAN	357073	18	18.4459				P02545	LMNA	Prelamin-A/C	LMNA_HUMAN	9705.76	24	13.2446
P02649	APOE	Apolipoprotein E	APOE_HUMAN	16909.7	539	14.0456				P02649	APOE	Apolipoprotein E	APOE_HUMAN	1493.82	208	10.5448
P02768	ALB	Serum albumin	ALBU_HUMAN	25011.1	365	14.6103				P02768	ALB	Serum albumin	ALBU_HUMAN	662.857	479	9.37255
P02786	TFRC	Transferrin receptor protein 1	TFR1_HUMAN	13516.3	642	13.7224				P02786	TFRC	Transferrin receptor protein 1	TFR1_HUMAN	757.438	416	9.56498
P02795	MT2A	Metallothionein-2	MT2_HUMAN	164137	42	17.3245				P02795	MT2A	Metallothionein-2	MT2_HUMAN	1826.73	163	10.835
P04040	CAT	Catalase	CATA_HUMAN	5635.93	1051	12.4604				P04040	CAT	Catalase	CATA_HUMAN	252.867	940	7.98223
P04075	ALDOA	Fructose-bisphosphate aldolase A	ALDOA_HUMAN	125454	59	16.9368				P04075	ALDOA	Fructose-bisphosphate aldolase A	ALDOA_HUMAN	4072.37	61	11.9917
P04080	CSTB	Cystatin-B	CYTB_HUMAN	32775.3	287	15.0003				P04080	CSTB	Cystatin-B	CYTB_HUMAN	943.627	341	9.88207
P04083	ANXA1	Annexin A1	ANXA1_HUMAN	160685	43	17.2939				P04083	ANXA1	Annexin A1	ANXA1_HUMAN	4910.68	49	12.2617
P04114	APOB	Apolipoprotein B-100	APOB_HUMAN	10727.2	766	13.389				P04114	APOB	Apolipoprotein B-100	APOB_HUMAN	799.09	393	9.64221
P04181	OAT	Ornithine aminotransferase, mitochondrial	OAT_HUMAN	14559.9	600	13.8297				P04181	OAT	Ornithine aminotransferase, mitochondrial	OAT_HUMAN	455.011	673	8.82976
P04406	GAPDH	Glyceraldehyde-3-phosphate dehydrogenase	G3P_HUMAN	796282	3	19.6029				P04406	GAPDH	Glyceraldehyde-3-phosphate dehydrogenase	G3P_HUMAN	24395.3	8	14.5743
P04632	CAPNS1	Calpain small subunit 1	CPNS1_HUMAN	36506.5	257	15.1559				P04632	CAPNS1	Calpain small subunit 1	CPNS1_HUMAN	1239.6	262	10.2757
P04637	TP53	Cellular tumor antigen p53	P53_HUMAN	4491.54	1115	12.133				P04637	TP53	Cellular tumor antigen p53	P53_HUMAN	219.525	990	7.77824
P04792	HSPB1	Heat shock protein beta-1	HSPB1_HUMAN	37551	251	15.1966				P04792	HSPB1	Heat shock protein beta-1	HSPB1_HUMAN	1461.02	212	10.5128
P04818	TYMS	Thymidylate synthase	TYSY_HUMAN	18396.6	502	14.1672				P04818	TYMS	Thymidylate synthase	TYSY_HUMAN	1049.27	307	10.0352
P04843	RPN1	Dolichyl-diphosphooligosaccharide--protein glycosyltransferase subunit 1	RPN1_HUMAN	13657.6	637	13.7374				P04843	RPN1	Dolichyl-diphosphooligosaccharide--protein glycosyltransferase subunit 1	RPN1_HUMAN	884.105	360	9.78807
P04899	GNAI2	Guanine nucleotide-binding protein G(i) subunit alpha-2	GNAI2_HUMAN	7104.58	963	12.7945				P04899	GNAI2	Guanine nucleotide-binding protein G(i) subunit alpha-2	GNAI2_HUMAN	207.875	1014	7.69957
P05023	ATP1A1	Sodium/potassium-transporting ATPase subunit alpha-1	AT1A1_HUMAN	50658.7	181	15.6285				P05023	ATP1A1	Sodium/potassium-transporting ATPase subunit alpha-1	AT1A1_HUMAN	1405.4	221	10.4568
P05114	HMGN1	Non-histone chromosomal protein HMG-14	HMGN1_HUMAN	18326	505	14.1616				P05114	HMGN1	Non-histone chromosomal protein HMG-14	HMGN1_HUMAN	472.495	654	8.88415
P05121	SERPINE1	Plasminogen activator inhibitor 1	PAI1_HUMAN	6380.04	997	12.6393				P05121	SERPINE1	Plasminogen activator inhibitor 1	PAI1_HUMAN	154.157	1096	7.26826
P05141	SLC25A5	ADP/ATP translocase 2	ADT2_HUMAN	96763.7	80	16.5622				P05141	SLC25A5	ADP/ATP translocase 2	ADT2_HUMAN	2565.94	106	11.3253
P05161	ISG15	Ubiquitin-like protein ISG15	ISG15_HUMAN	6233	1003	12.6057				P05161	ISG15	Ubiquitin-like protein ISG15	ISG15_HUMAN	156.093	1095	7.28627
P05198	EIF2S1	Eukaryotic translation initiation factor 2 subunit 1	IF2A_HUMAN	20729.9	440	14.3394				P05198	EIF2S1	Eukaryotic translation initiation factor 2 subunit 1	IF2A_HUMAN	1031.4	312	10.0104
P05387	RPLP2	60S acidic ribosomal protein P2	RLA2_HUMAN	52674.7	171	15.6848				P05387	RPLP2	60S acidic ribosomal protein P2	RLA2_HUMAN	1020	318	9.99435
P05388	RPLP0	60S acidic ribosomal protein P0	RLA0_HUMAN	61374.7	145	15.9054				P05388	RPLP0	60S acidic ribosomal protein P0	RLA0_HUMAN	2244.58	126	11.1322
P05455	SSB	Lupus La protein	LA_HUMAN	16753.1	543	14.0321				P05455	SSB	Lupus La protein	LA_HUMAN	506.797	624	8.98526
P05556	ITGB1	Integrin beta-1	ITB1_HUMAN	40182.4	239	15.2943				P05556	ITGB1	Integrin beta-1	ITB1_HUMAN	864.926	369	9.75643
P05783	KRT18	Keratin, type I cytoskeletal 18	K1C18_HUMAN	158492	45	17.2741				P05783	KRT18	Keratin, type I cytoskeletal 18	K1C18_HUMAN	3138.96	84	11.6161
P05787	KRT8	Keratin, type II cytoskeletal 8	K2C8_HUMAN	217770	32	17.7324				P05787	KRT8	Keratin, type II cytoskeletal 8	K2C8_HUMAN	5780.56	42	12.497
P06132	UROD	Uroporphyrinogen decarboxylase	DCUP_HUMAN	4807.82	1098	12.2312				P06132	UROD	Uroporphyrinogen decarboxylase	DCUP_HUMAN	236.578	967	7.88617
P06396	GSN	Gelsolin	GELS_HUMAN	8868.9	851	13.1145				P06396	GSN	Gelsolin	GELS_HUMAN	523.787	599	9.03284
P06400	RB1	Retinoblastoma-associated protein	RB_HUMAN	2138.35	1177	11.0623				P06400	RB1	Retinoblastoma-associated protein	RB_HUMAN	160.285	1089	7.32449
P06454	PTMA	Prothymosin alpha	PTMA_HUMAN	199097	40	17.6031				P06454	PTMA	Prothymosin alpha	PTMA_HUMAN	11136.8	22	13.443
P06493	CDK1	Cyclin-dependent kinase 1	CDK1_HUMAN	16665.5	544	14.0246				P06493	CDK1	Cyclin-dependent kinase 1	CDK1_HUMAN	470.232	655	8.87723
P06576	ATP5F1B	ATP synthase subunit beta, mitochondrial	ATPB_HUMAN	60790.5	149	15.8916				P06576	ATP5F1B	ATP synthase subunit beta, mitochondrial	ATPB_HUMAN	2239.03	127	11.1287
P06703	S100A6	Protein S100-A6	S10A6_HUMAN	618945	5	19.2395				P06703	S100A6	Protein S100-A6	S10A6_HUMAN	25250.7	7	14.624
P06730	EIF4E	Eukaryotic translation initiation factor 4E	IF4E_HUMAN	7414.78	944	12.8562				P06730	EIF4E	Eukaryotic translation initiation factor 4E	IF4E_HUMAN	99.5811	1165	6.6378
P06733	ENO1	Alpha-enolase	ENOA_HUMAN	82117.6	101	16.3254				P06733	ENO1	Alpha-enolase	ENOA_HUMAN	5548.17	46	12.4378
P06737	PYGL	Glycogen phosphorylase, liver form	PYGL_HUMAN	6760.71	975	12.723				P06737	PYGL	Glycogen phosphorylase, liver form	PYGL_HUMAN	249.549	949	7.96318
P06744	GPI	Glucose-6-phosphate isomerase	G6PI_HUMAN	46508.8	202	15.5052				P06744	GPI	Glucose-6-phosphate isomerase	G6PI_HUMAN	1768.61	177	10.7884
P06748	NPM1	Nucleophosmin	NPM_HUMAN	137756	56	17.0718				P06748	NPM1	Nucleophosmin	NPM_HUMAN	5187.6	47	12.3409
P06753	TPM3	Tropomyosin alpha-3 chain	TPM3_HUMAN	45342.4	207	15.4686				P06753	TPM3	Tropomyosin alpha-3 chain	TPM3_HUMAN	937.047	344	9.87198
P06899;P23527;P33778;Q16778	HIST1H2BJ;HIST1H2BO;HIST1H2BB;HIST2H2BE	Histone H2B type 1-J;Histone H2B type 1-O;Histone H2B type 1-B;Histone H2B type 2-E	H2B1J_HUMAN;H2B1O_HUMAN;H2B1B_HUMAN;H2B2E_HUMAN	434116	14	18.7277				P06899;P23527;P33778;Q16778	HIST1H2BJ;HIST1H2BO;HIST1H2BB;HIST2H2BE	Histone H2B type 1-J;Histone H2B type 1-O;Histone H2B type 1-B;Histone H2B type 2-E	H2B1J_HUMAN;H2B1O_HUMAN;H2B1B_HUMAN;H2B2E_HUMAN	13598.3	17	13.7311
P07195	LDHB	L-lactate dehydrogenase B chain	LDHB_HUMAN	251971	26	17.9429				P07195	LDHB	L-lactate dehydrogenase B chain	LDHB_HUMAN	7352.97	31	12.8441
P07237	P4HB	Protein disulfide-isomerase	PDIA1_HUMAN	56115.4	161	15.7761				P07237	P4HB	Protein disulfide-isomerase	PDIA1_HUMAN	1898.48	155	10.8906
P07339	CTSD	Cathepsin D	CATD_HUMAN	57145.4	156	15.8024				P07339	CTSD	Cathepsin D	CATD_HUMAN	1093.13	294	10.0943
P07355	ANXA2	Annexin A2	ANXA2_HUMAN	366576	17	18.4838				P07355	ANXA2	Annexin A2	ANXA2_HUMAN	13095.9	18	13.6768
P07384	CAPN1	Calpain-1 catalytic subunit	CAN1_HUMAN	7528.04	935	12.8781				P07384	CAPN1	Calpain-1 catalytic subunit	CAN1_HUMAN	192.422	1041	7.58813
P07437	TUBB	Tubulin beta chain	TBB5_HUMAN	251861	27	17.9423				P07437	TUBB	Tubulin beta chain	TBB5_HUMAN	22058.4	9	14.429
P07602	PSAP	Prosaposin	SAP_HUMAN	12176.8	713	13.5719				P07602	PSAP	Prosaposin	SAP_HUMAN	448.298	678	8.80831
P07737	PFN1	Profilin-1	PROF1_HUMAN	221645	31	17.7579				P07737	PFN1	Profilin-1	PROF1_HUMAN	12674	19	13.6296
P07741	APRT	Adenine phosphoribosyltransferase	APT_HUMAN	9496.31	820	13.2132				P07741	APRT	Adenine phosphoribosyltransferase	APT_HUMAN	423.195	710	8.72518
P07814	EPRS	Bifunctional glutamate/proline--tRNA ligase	SYEP_HUMAN	37656.2	250	15.2006				P07814	EPRS	Bifunctional glutamate/proline--tRNA ligase	SYEP_HUMAN	1150.59	280	10.1682
P07900	HSP90AA1	Heat shock protein HSP 90-alpha	HS90A_HUMAN	267431	25	18.0288				P07900	HSP90AA1	Heat shock protein HSP 90-alpha	HS90A_HUMAN	4521.22	53	12.1425
P07910	HNRNPC	Heterogeneous nuclear ribonucleoproteins C1/C2	HNRPC_HUMAN	86260.4	94	16.3964				P07910	HNRNPC	Heterogeneous nuclear ribonucleoproteins C1/C2	HNRPC_HUMAN	2675	96	11.3853
P07954	FH	Fumarate hydratase, mitochondrial	FUMH_HUMAN	9450.81	824	13.2062				P07954	FH	Fumarate hydratase, mitochondrial	FUMH_HUMAN	201.118	1029	7.65189
P08133	ANXA6	Annexin A6	ANXA6_HUMAN	50875.3	180	15.6347				P08133	ANXA6	Annexin A6	ANXA6_HUMAN	764.471	411	9.57832
P08174	CD55	Complement decay-accelerating factor	DAF_HUMAN	7859.11	912	12.9402				P08174	CD55	Complement decay-accelerating factor	DAF_HUMAN	348.354	795	8.44441
P08195	SLC3A2	4F2 cell-surface antigen heavy chain	4F2_HUMAN	15810.5	562	13.9486				P08195	SLC3A2	4F2 cell-surface antigen heavy chain	4F2_HUMAN	520.772	605	9.02451
P08238	HSP90AB1	Heat shock protein HSP 90-beta	HS90B_HUMAN	461535	13	18.8161				P08238	HSP90AB1	Heat shock protein HSP 90-beta	HS90B_HUMAN	14350.3	15	13.8088
P08243	ASNS	Asparagine synthetase [glutamine-hydrolyzing]	ASNS_HUMAN	16896.1	540	14.0444				P08243	ASNS	Asparagine synthetase [glutamine-hydrolyzing]	ASNS_HUMAN	575.139	547	9.16777
P08397	HMBS	Porphobilinogen deaminase	HEM3_HUMAN	5719.86	1046	12.4818				P08397	HMBS	Porphobilinogen deaminase	HEM3_HUMAN	125.4	1137	6.97039
P08579	SNRPB2	U2 small nuclear ribonucleoprotein B''	RU2B_HUMAN	16940.2	538	14.0482				P08579	SNRPB2	U2 small nuclear ribonucleoprotein B''	RU2B_HUMAN	640.05	496	9.32204
P08621	SNRNP70	U1 small nuclear ribonucleoprotein 70 kDa	RU17_HUMAN	14815	591	13.8548				P08621	SNRNP70	U1 small nuclear ribonucleoprotein 70 kDa	RU17_HUMAN	970.549	334	9.92266
P08670	VIM	Vimentin	VIME_HUMAN	1.23556e+06	2	20.2367				P08670	VIM	Vimentin	VIME_HUMAN	32999.9	5	15.0102
P08708	RPS17	40S ribosomal protein S17	RS17_HUMAN	36563.7	255	15.1581				P08708	RPS17	40S ribosomal protein S17	RS17_HUMAN	1344.5	235	10.3929
P08727	KRT19	Keratin, type I cytoskeletal 19	K1C19_HUMAN	77014.7	109	16.2328				P08727	KRT19	Keratin, type I cytoskeletal 19	K1C19_HUMAN	1446.9	217	10.4988
P08729	KRT7	Keratin, type II cytoskeletal 7	K2C7_HUMAN	122977	63	16.908				P08729	KRT7	Keratin, type II cytoskeletal 7	K2C7_HUMAN	3786.32	68	11.8866
P08758	ANXA5	Annexin A5	ANXA5_HUMAN	283600	21	18.1135				P08758	ANXA5	Annexin A5	ANXA5_HUMAN	6560.44	35	12.6796
P08865	RPSA	40S ribosomal protein SA	RSSA_HUMAN	138176	55	17.0762				P08865	RPSA	40S ribosomal protein SA	RSSA_HUMAN	4565.05	52	12.1564
P08962	CD63	CD63 antigen	CD63_HUMAN	13292.1	651	13.6983				P08962	CD63	CD63 antigen	CD63_HUMAN	854.103	374	9.73827
P09012	SNRPA	U1 small nuclear ribonucleoprotein A	SNRPA_HUMAN	41568.8	233	15.3432				P09012	SNRPA	U1 small nuclear ribonucleoprotein A	SNRPA_HUMAN	1477.16	210	10.5286
P09104	ENO2	Gamma-enolase	ENOG_HUMAN	18946.7	485	14.2097				P09104	ENO2	Gamma-enolase	ENOG_HUMAN	620.875	515	9.27816
P09211	GSTP1	Glutathione S-transferase P	GSTP1_HUMAN	32227	294	14.976				P09211	GSTP1	Glutathione S-transferase P	GSTP1_HUMAN	763.623	413	9.57672
P09382	LGALS1	Galectin-1	LEG1_HUMAN	112175	71	16.7754				P09382	LGALS1	Galectin-1	LEG1_HUMAN	5859.02	39	12.5164
P09429	HMGB1	High mobility group protein B1	HMGB1_HUMAN	15004.4	586	13.8731				P09429	HMGB1	High mobility group protein B1	HMGB1_HUMAN	473.338	651	8.88673
P09496	CLTA	Clathrin light chain A	CLCA_HUMAN	27030	350	14.7223				P09496	CLTA	Clathrin light chain A	CLCA_HUMAN	726.19	433	9.5042
P09497	CLTB	Clathrin light chain B	CLCB_HUMAN	12569.1	690	13.6176				P09497	CLTB	Clathrin light chain B	CLCB_HUMAN	355.883	782	8.47526
P09543	CNP	2',3'-cyclic-nucleotide 3'-phosphodiesterase	CN37_HUMAN	5142.57	1074	12.3283				P09543	CNP	2',3'-cyclic-nucleotide 3'-phosphodiesterase	CN37_HUMAN	441.242	686	8.78543
P09622	DLD	Dihydrolipoyl dehydrogenase, mitochondrial	DLDH_HUMAN	10615.2	774	13.3738				P09622	DLD	Dihydrolipoyl dehydrogenase, mitochondrial	DLDH_HUMAN	378.314	759	8.56344
P09651	HNRNPA1	Heterogeneous nuclear ribonucleoprotein A1	ROA1_HUMAN	91670.5	87	16.4842				P09651	HNRNPA1	Heterogeneous nuclear ribonucleoprotein A1	ROA1_HUMAN	2527.7	110	11.3036
P09661	SNRPA1	U2 small nuclear ribonucleoprotein A'	RU2A_HUMAN	12721.7	681	13.635				P09661	SNRPA1	U2 small nuclear ribonucleoprotein A'	RU2A_HUMAN	299.146	869	8.22471
P09669	COX6C	Cytochrome c oxidase subunit 6C	COX6C_HUMAN	5791.48	1039	12.4997				P09669	COX6C	Cytochrome c oxidase subunit 6C	COX6C_HUMAN	241.75	956	7.91737
P09874	PARP1	Poly [ADP-ribose] polymerase 1	PARP1_HUMAN	18352.1	503	14.1637				P09874	PARP1	Poly [ADP-ribose] polymerase 1	PARP1_HUMAN	617.097	517	9.26935
P09960	LTA4H	Leukotriene A-4 hydrolase	LKHA4_HUMAN	12225.9	708	13.5777				P09960	LTA4H	Leukotriene A-4 hydrolase	LKHA4_HUMAN	453.761	675	8.82579
P0C0S5;Q71UI9	H2AFZ;H2AFV	Histone H2A.Z;Histone H2A.V	H2AZ_HUMAN;H2AV_HUMAN	7711.16	922	12.9127				P0C0S5;Q71UI9	H2AFZ;H2AFV	Histone H2A.Z;Histone H2A.V	H2AZ_HUMAN;H2AV_HUMAN	36512.1	4	15.1561
P0DMV8;P0DMV9	HSPA1A;HSPA1B	Heat shock 70 kDa protein 1A;Heat shock 70 kDa protein 1B	HS71A_HUMAN;HS71B_HUMAN	73140.7	116	16.1584				P0DMV8;P0DMV9	HSPA1A;HSPA1B	Heat shock 70 kDa protein 1A;Heat shock 70 kDa protein 1B	HS71A_HUMAN;HS71B_HUMAN	1602.33	193	10.646
P0DN76;Q01081	U2AF1L5;U2AF1	Splicing factor U2AF 35 kDa subunit-like protein;Splicing factor U2AF 35 kDa subunit	U2AF5_HUMAN;U2AF1_HUMAN	28328.4	335	14.79				P0DN76;Q01081	U2AF1L5;U2AF1	Splicing factor U2AF 35 kDa subunit-like protein;Splicing factor U2AF 35 kDa subunit	U2AF5_HUMAN;U2AF1_HUMAN	1194.7	270	10.2224
P0DP23;P0DP24;P0DP25	CALM1;CALM2;CALM3	Calmodulin-1;Calmodulin-2;Calmodulin-3	CALM1_HUMAN;CALM2_HUMAN;CALM3_HUMAN	164686	41	17.3294				P0DP23;P0DP24;P0DP25	CALM1;CALM2;CALM3	Calmodulin-1;Calmodulin-2;Calmodulin-3	CALM1_HUMAN;CALM2_HUMAN;CALM3_HUMAN	5680.59	44	12.4718
P10515	DLAT	Dihydrolipoyllysine-residue acetyltransferase component of pyruvate dehydrogenase complex, mitochondrial	ODP2_HUMAN	8357.56	885	13.0289				P10515	DLAT	Dihydrolipoyllysine-residue acetyltransferase component of pyruvate dehydrogenase complex, mitochondrial	ODP2_HUMAN	562.096	563	9.13467
P10599	TXN	Thioredoxin	THIO_HUMAN	200558	38	17.6137				P10599	TXN	Thioredoxin	THIO_HUMAN	2600.93	103	11.3448
P10644	PRKAR1A	cAMP-dependent protein kinase type I-alpha regulatory subunit	KAP0_HUMAN	9473.96	821	13.2098				P10644	PRKAR1A	cAMP-dependent protein kinase type I-alpha regulatory subunit	KAP0_HUMAN	307.188	853	8.26298
P10768	ESD	S-formylglutathione hydrolase	ESTD_HUMAN	7022.34	966	12.7777				P10768	ESD	S-formylglutathione hydrolase	ESTD_HUMAN	416.892	718	8.70353
P10809	HSPD1	60 kDa heat shock protein, mitochondrial	CH60_HUMAN	44383.2	211	15.4377				P10809	HSPD1	60 kDa heat shock protein, mitochondrial	CH60_HUMAN	2197.13	131	11.1014
P11021	HSPA5	Endoplasmic reticulum chaperone BiP	BIP_HUMAN	53023.9	169	15.6944				P11021	HSPA5	Endoplasmic reticulum chaperone BiP	BIP_HUMAN	1351.86	233	10.4007
P11142	HSPA8	Heat shock cognate 71 kDa protein	HSP7C_HUMAN	123271	62	16.9115				P11142	HSPA8	Heat shock cognate 71 kDa protein	HSP7C_HUMAN	7269.75	32	12.8277
P11166	SLC2A1	Solute carrier family 2, facilitated glucose transporter member 1	GTR1_HUMAN	16099.3	552	13.9747				P11166	SLC2A1	Solute carrier family 2, facilitated glucose transporter member 1	GTR1_HUMAN	881.638	363	9.78404
P11177	PDHB	Pyruvate dehydrogenase E1 component subunit beta, mitochondrial	ODPB_HUMAN	12360	698	13.5934				P11177	PDHB	Pyruvate dehydrogenase E1 component subunit beta, mitochondrial	ODPB_HUMAN	164.193	1085	7.35925
P11216	PYGB	Glycogen phosphorylase, brain form	PYGB_HUMAN	31536.9	303	14.9448				P11216	PYGB	Glycogen phosphorylase, brain form	PYGB_HUMAN	699.244	452	9.44965
P11279	LAMP1	Lysosome-associated membrane glycoprotein 1	LAMP1_HUMAN	21929	413	14.4206				P11279	LAMP1	Lysosome-associated membrane glycoprotein 1	LAMP1_HUMAN	886.272	358	9.79161
P11387	TOP1	DNA topoisomerase 1	TOP1_HUMAN	11335.8	742	13.4686				P11387	TOP1	DNA topoisomerase 1	TOP1_HUMAN	423.888	708	8.72754
P11388	TOP2A	DNA topoisomerase 2-alpha	TOP2A_HUMAN	8432.61	874	13.0418				P11388	TOP2A	DNA topoisomerase 2-alpha	TOP2A_HUMAN	339.743	806	8.4083
P11413	G6PD	Glucose-6-phosphate 1-dehydrogenase	G6PD_HUMAN	31321.6	306	14.9349				P11413	G6PD	Glucose-6-phosphate 1-dehydrogenase	G6PD_HUMAN	1056.7	305	10.0454
P11586	MTHFD1	C-1-tetrahydrofolate synthase, cytoplasmic	C1TC_HUMAN	44532.8	210	15.4426				P11586	MTHFD1	C-1-tetrahydrofolate synthase, cytoplasmic	C1TC_HUMAN	1311.71	242	10.3572
P11766	ADH5	Alcohol dehydrogenase class-3	ADHX_HUMAN	11770.7	722	13.5229				P11766	ADH5	Alcohol dehydrogenase class-3	ADHX_HUMAN	425.334	702	8.73245
P11908	PRPS2	Ribose-phosphate pyrophosphokinase 2	PRPS2_HUMAN	7394.84	946	12.8523				P11908	PRPS2	Ribose-phosphate pyrophosphokinase 2	PRPS2_HUMAN	173.153	1074	7.4359
P11940	PABPC1	Polyadenylate-binding protein 1	PABP1_HUMAN	74686	114	16.1885				P11940	PABPC1	Polyadenylate-binding protein 1	PABP1_HUMAN	1780.77	174	10.7983
P12004	PCNA	Proliferating cell nuclear antigen	PCNA_HUMAN	43981.3	215	15.4246				P12004	PCNA	Proliferating cell nuclear antigen	PCNA_HUMAN	1325.38	240	10.3722
P12081	HARS	Histidine--tRNA ligase, cytoplasmic	SYHC_HUMAN	10630.2	772	13.3759				P12081	HARS	Histidine--tRNA ligase, cytoplasmic	SYHC_HUMAN	640.479	495	9.32301
P12236	SLC25A6	ADP/ATP translocase 3	ADT3_HUMAN	13918	627	13.7647				P12236	SLC25A6	ADP/ATP translocase 3	ADT3_HUMAN	551.961	571	9.10842
P12268	IMPDH2	Inosine-5'-monophosphate dehydrogenase 2	IMDH2_HUMAN	56365.5	159	15.7825				P12268	IMPDH2	Inosine-5'-monophosphate dehydrogenase 2	IMDH2_HUMAN	1397.04	223	10.4482
P12270	TPR	Nucleoprotein TPR	TPR_HUMAN	10595.6	778	13.3712				P12270	TPR	Nucleoprotein TPR	TPR_HUMAN	262.928	925	8.03852
P12429	ANXA3	Annexin A3	ANXA3_HUMAN	42363.7	226	15.3705				P12429	ANXA3	Annexin A3	ANXA3_HUMAN	1286.94	245	10.3297
P12814	ACTN1	Alpha-actinin-1	ACTN1_HUMAN	101940	76	16.6374				P12814	ACTN1	Alpha-actinin-1	ACTN1_HUMAN	1033.14	311	10.0128
P12955	PEPD	Xaa-Pro dipeptidase	PEPD_HUMAN	9500.45	819	13.2138				P12955	PEPD	Xaa-Pro dipeptidase	PEPD_HUMAN	355.305	786	8.47292
P12956	XRCC6	X-ray repair cross-complementing protein 6	XRCC6_HUMAN	21288.8	429	14.3778				P12956	XRCC6	X-ray repair cross-complementing protein 6	XRCC6_HUMAN	810.783	387	9.66317
P13010	XRCC5	X-ray repair cross-complementing protein 5	XRCC5_HUMAN	49884.5	184	15.6063				P13010	XRCC5	X-ray repair cross-complementing protein 5	XRCC5_HUMAN	1226.99	265	10.2609
P13473	LAMP2	Lysosome-associated membrane glycoprotein 2	LAMP2_HUMAN	14126.4	618	13.7861				P13473	LAMP2	Lysosome-associated membrane glycoprotein 2	LAMP2_HUMAN	288.094	882	8.17039
P13489	RNH1	Ribonuclease inhibitor	RINI_HUMAN	32272.3	292	14.978				P13489	RNH1	Ribonuclease inhibitor	RINI_HUMAN	762.831	414	9.57522
P13639	EEF2	Elongation factor 2	EF2_HUMAN	293445	20	18.1627				P13639	EEF2	Elongation factor 2	EF2_HUMAN	8195.04	28	13.0005
P13667	PDIA4	Protein disulfide-isomerase A4	PDIA4_HUMAN	32039.9	295	14.9676				P13667	PDIA4	Protein disulfide-isomerase A4	PDIA4_HUMAN	1081.03	298	10.0782
P13693	TPT1	Translationally-controlled tumor protein	TCTP_HUMAN	20815.6	436	14.3454				P13693	TPT1	Translationally-controlled tumor protein	TCTP_HUMAN	490.05	631	8.93678
P13726	F3	Tissue factor	TF_HUMAN	8369.86	882	13.031				P13726	F3	Tissue factor	TF_HUMAN	205.936	1019	7.68605
P13797	PLS3	Plastin-3	PLST_HUMAN	26991.5	351	14.7202				P13797	PLS3	Plastin-3	PLST_HUMAN	663.866	478	9.37475
P13798	APEH	Acylamino-acid-releasing enzyme	ACPH_HUMAN	8143.98	896	12.9915				P13798	APEH	Acylamino-acid-releasing enzyme	ACPH_HUMAN	317.346	838	8.30991
P13861	PRKAR2A	cAMP-dependent protein kinase type II-alpha regulatory subunit	KAP2_HUMAN	7660.65	924	12.9033				P13861	PRKAR2A	cAMP-dependent protein kinase type II-alpha regulatory subunit	KAP2_HUMAN	405.857	729	8.66483
P13987	CD59	CD59 glycoprotein	CD59_HUMAN	16173.9	551	13.9814				P13987	CD59	CD59 glycoprotein	CD59_HUMAN	316.545	841	8.30627
P14174	MIF	Macrophage migration inhibitory factor	MIF_HUMAN	157004	47	17.2604				P14174	MIF	Macrophage migration inhibitory factor	MIF_HUMAN	2369.19	118	11.2102
P14314	PRKCSH	Glucosidase 2 subunit beta	GLU2B_HUMAN	56247.6	160	15.7795				P14314	PRKCSH	Glucosidase 2 subunit beta	GLU2B_HUMAN	1134.5	285	10.1478
P14324	FDPS	Farnesyl pyrophosphate synthase	FPPS_HUMAN	11229.5	746	13.455				P14324	FDPS	Farnesyl pyrophosphate synthase	FPPS_HUMAN	383.98	752	8.58489
P14618	PKM	Pyruvate kinase PKM	KPYM_HUMAN	618234	6	19.2378				P14618	PKM	Pyruvate kinase PKM	KPYM_HUMAN	19146.2	11	14.2248
P14625	HSP90B1	Endoplasmin	ENPL_HUMAN	92718.4	85	16.5006				P14625	HSP90B1	Endoplasmin	ENPL_HUMAN	3120.45	85	11.6075
P14735	IDE	Insulin-degrading enzyme	IDE_HUMAN	5325.67	1067	12.3787				P14735	IDE	Insulin-degrading enzyme	IDE_HUMAN	254.652	933	7.99238
P14866	HNRNPL	Heterogeneous nuclear ribonucleoprotein L	HNRPL_HUMAN	34493	276	15.074				P14866	HNRNPL	Heterogeneous nuclear ribonucleoprotein L	HNRPL_HUMAN	1008.33	319	9.97775
P14868	DARS	Aspartate--tRNA ligase, cytoplasmic	SYDC_HUMAN	18578	497	14.1813				P14868	DARS	Aspartate--tRNA ligase, cytoplasmic	SYDC_HUMAN	303.721	861	8.2466
P15121	AKR1B1	Aldose reductase	ALDR_HUMAN	30248.9	318	14.8846				P15121	AKR1B1	Aldose reductase	ALDR_HUMAN	1146.96	282	10.1636
P15170	GSPT1	Eukaryotic peptide chain release factor GTP-binding subunit ERF3A	ERF3A_HUMAN	12991.7	665	13.6653				P15170	GSPT1	Eukaryotic peptide chain release factor GTP-binding subunit ERF3A	ERF3A_HUMAN	487.599	633	8.92955
P15311	EZR	Ezrin	EZRI_HUMAN	33115.4	282	15.0152				P15311	EZR	Ezrin	EZRI_HUMAN	1270.76	253	10.3115
P15374	UCHL3	Ubiquitin carboxyl-terminal hydrolase isozyme L3	UCHL3_HUMAN	2655.28	1173	11.3746				P15374	UCHL3	Ubiquitin carboxyl-terminal hydrolase isozyme L3	UCHL3_HUMAN	188.549	1051	7.5588
P15531	NME1	Nucleoside diphosphate kinase A	NDKA_HUMAN	22155.3	407	14.4354				P15531	NME1	Nucleoside diphosphate kinase A	NDKA_HUMAN	6470.21	36	12.6596
P15586	GNS	N-acetylglucosamine-6-sulfatase	GNS_HUMAN	2900.7	1163	11.5022				P15586	GNS	N-acetylglucosamine-6-sulfatase	GNS_HUMAN	173.795	1071	7.44125
P15880	RPS2	40S ribosomal protein S2	RS2_HUMAN	91849.4	86	16.487				P15880	RPS2	40S ribosomal protein S2	RS2_HUMAN	3074.77	87	11.5863
P15927	RPA2	Replication protein A 32 kDa subunit	RFA2_HUMAN	9249.4	832	13.1751				P15927	RPA2	Replication protein A 32 kDa subunit	RFA2_HUMAN	237.874	965	7.89405
P16070	CD44	CD44 antigen	CD44_HUMAN	34929.4	269	15.0922				P16070	CD44	CD44 antigen	CD44_HUMAN	2069	145	11.0147
P16144	ITGB4	Integrin beta-4	ITB4_HUMAN	6141.83	1010	12.5845				P16144	ITGB4	Integrin beta-4	ITB4_HUMAN	319.642	836	8.32031
P16152	CBR1	Carbonyl reductase [NADPH] 1	CBR1_HUMAN	11489.4	734	13.488				P16152	CBR1	Carbonyl reductase [NADPH] 1	CBR1_HUMAN	347.416	796	8.44052
P16401	HIST1H1B	Histone H1.5	H15_HUMAN	587529	7	19.1643				P16401	HIST1H1B	Histone H1.5	H15_HUMAN	18885.4	13	14.205
P16403	HIST1H1C	Histone H1.2	H12_HUMAN	377766	16	18.5271				P16403	HIST1H1C	Histone H1.2	H12_HUMAN	13826.9	16	13.7552
P16615	ATP2A2	Sarcoplasmic/endoplasmic reticulum calcium ATPase 2	AT2A2_HUMAN	12148.1	714	13.5684				P16615	ATP2A2	Sarcoplasmic/endoplasmic reticulum calcium ATPase 2	AT2A2_HUMAN	605.283	528	9.24147
P16949	STMN1	Stathmin	STMN1_HUMAN	46683.3	201	15.5106				P16949	STMN1	Stathmin	STMN1_HUMAN	2634.13	99	11.3631
P16989	YBX3	Y-box-binding protein 3	YBOX3_HUMAN	8393.09	875	13.035				P16989	YBX3	Y-box-binding protein 3	YBOX3_HUMAN	88.1012	1171	6.46109
P17096	HMGA1	High mobility group protein HMG-I/HMG-Y	HMGA1_HUMAN	143573	54	17.1314				P17096	HMGA1	High mobility group protein HMG-I/HMG-Y	HMGA1_HUMAN	5041.19	48	12.2995
P17174	GOT1	Aspartate aminotransferase, cytoplasmic	AATC_HUMAN	21546.7	424	14.3952				P17174	GOT1	Aspartate aminotransferase, cytoplasmic	AATC_HUMAN	800.821	392	9.64534
P17301	ITGA2	Integrin alpha-2	ITA2_HUMAN	10702.5	769	13.3857				P17301	ITGA2	Integrin alpha-2	ITA2_HUMAN	435.275	694	8.76578
P17655	CAPN2	Calpain-2 catalytic subunit	CAN2_HUMAN	28075.6	337	14.777				P17655	CAPN2	Calpain-2 catalytic subunit	CAN2_HUMAN	1335.48	239	10.3831
P17812	CTPS1	CTP synthase 1	PYRG1_HUMAN	6687.81	982	12.7073				P17812	CTPS1	CTP synthase 1	PYRG1_HUMAN	167.032	1081	7.38398
P17844	DDX5	Probable ATP-dependent RNA helicase DDX5	DDX5_HUMAN	45696.9	206	15.4798				P17844	DDX5	Probable ATP-dependent RNA helicase DDX5	DDX5_HUMAN	1383.46	227	10.4341
P17931	LGALS3	Galectin-3	LEG3_HUMAN	26870.6	353	14.7137				P17931	LGALS3	Galectin-3	LEG3_HUMAN	2555.63	108	11.3195
P17980	PSMC3	26S proteasome regulatory subunit 6A	PRS6A_HUMAN	14435.9	608	13.8174				P17980	PSMC3	26S proteasome regulatory subunit 6A	PRS6A_HUMAN	434.679	695	8.76381
P17987	TCP1	T-complex protein 1 subunit alpha	TCPA_HUMAN	51674.3	176	15.6572				P17987	TCP1	T-complex protein 1 subunit alpha	TCPA_HUMAN	1817.64	165	10.8278
P18077	RPL35A	60S ribosomal protein L35a	RL35A_HUMAN	20465	443	14.3209				P18077	RPL35A	60S ribosomal protein L35a	RL35A_HUMAN	917.563	350	9.84166
P18085	ARF4	ADP-ribosylation factor 4	ARF4_HUMAN	56905.7	158	15.7963				P18085	ARF4	ADP-ribosylation factor 4	ARF4_HUMAN	2484.27	112	11.2786
P18124	RPL7	60S ribosomal protein L7	RL7_HUMAN	65334.3	135	15.9956				P18124	RPL7	60S ribosomal protein L7	RL7_HUMAN	2274.42	121	11.1513
P18206	VCL	Vinculin	VINC_HUMAN	57419	155	15.8092				P18206	VCL	Vinculin	VINC_HUMAN	1212.1	268	10.2433
P18583	SON	Protein SON	SON_HUMAN	7950.17	904	12.9568				P18583	SON	Protein SON	SON_HUMAN	130.923	1129	7.03257
P18621	RPL17	60S ribosomal protein L17	RL17_HUMAN	17083.1	533	14.0603				P18621	RPL17	60S ribosomal protein L17	RL17_HUMAN	261.69	926	8.03171
P18669	PGAM1	Phosphoglycerate mutase 1	PGAM1_HUMAN	21186.7	430	14.3709				P18669	PGAM1	Phosphoglycerate mutase 1	PGAM1_HUMAN	620.881	514	9.27817
P18754	RCC1	Regulator of chromosome condensation	RCC1_HUMAN	13807.1	634	13.7531				P18754	RCC1	Regulator of chromosome condensation	RCC1_HUMAN	478.68	641	8.90292
P18858	LIG1	DNA ligase 1	DNLI1_HUMAN	6915.82	970	12.7557				P18858	LIG1	DNA ligase 1	DNLI1_HUMAN	231.908	974	7.85741
P19338	NCL	Nucleolin	NUCL_HUMAN	143958	52	17.1353				P19338	NCL	Nucleolin	NUCL_HUMAN	2901.79	91	11.5027
P19367	HK1	Hexokinase-1	HXK1_HUMAN	15457.1	570	13.916				P19367	HK1	Hexokinase-1	HXK1_HUMAN	710.937	446	9.47358
P19388	POLR2E	DNA-directed RNA polymerases I, II, and III subunit RPABC1	RPAB1_HUMAN	1466.68	1184	10.5183				P19388	POLR2E	DNA-directed RNA polymerases I, II, and III subunit RPABC1	RPAB1_HUMAN	268.368	915	8.06807
P19623	SRM	Spermidine synthase	SPEE_HUMAN	13871	629	13.7598				P19623	SRM	Spermidine synthase	SPEE_HUMAN	344.004	802	8.42628
P20020	ATP2B1	Plasma membrane calcium-transporting ATPase 1	AT2B1_HUMAN	4840.58	1096	12.241				P20020	ATP2B1	Plasma membrane calcium-transporting ATPase 1	AT2B1_HUMAN	102.501	1162	6.6795
P20042	EIF2S2	Eukaryotic translation initiation factor 2 subunit 2	IF2B_HUMAN	8625.06	860	13.0743				P20042	EIF2S2	Eukaryotic translation initiation factor 2 subunit 2	IF2B_HUMAN	276.382	899	8.11052
P20073	ANXA7	Annexin A7	ANXA7_HUMAN	8490.49	868	13.0516				P20073	ANXA7	Annexin A7	ANXA7_HUMAN	122.206	1145	6.93318
P20340	RAB6A	Ras-related protein Rab-6A	RAB6A_HUMAN	7474.28	942	12.8677				P20340	RAB6A	Ras-related protein Rab-6A	RAB6A_HUMAN	304.461	859	8.25012
P20618	PSMB1	Proteasome subunit beta type-1	PSB1_HUMAN	14089.4	620	13.7823				P20618	PSMB1	Proteasome subunit beta type-1	PSB1_HUMAN	374.419	763	8.54851
P20674	COX5A	Cytochrome c oxidase subunit 5A, mitochondrial	COX5A_HUMAN	13855.5	630	13.7582				P20674	COX5A	Cytochrome c oxidase subunit 5A, mitochondrial	COX5A_HUMAN	623.062	511	9.28323
P20700	LMNB1	Lamin-B1	LMNB1_HUMAN	61430.6	143	15.9067				P20700	LMNB1	Lamin-B1	LMNB1_HUMAN	2624.09	100	11.3576
P20810	CAST	Calpastatin	ICAL_HUMAN	21083.1	431	14.3638				P20810	CAST	Calpastatin	ICAL_HUMAN	1135.73	284	10.1494
P20962	PTMS	Parathymosin	PTMS_HUMAN	59524.2	154	15.8612				P20962	PTMS	Parathymosin	PTMS_HUMAN	2171.14	134	11.0842
P21266	GSTM3	Glutathione S-transferase Mu 3	GSTM3_HUMAN	13338.6	650	13.7033				P21266	GSTM3	Glutathione S-transferase Mu 3	GSTM3_HUMAN	606.452	525	9.24425
P21283	ATP6V1C1	V-type proton ATPase subunit C 1	VATC1_HUMAN	2656.29	1172	11.3752				P21283	ATP6V1C1	V-type proton ATPase subunit C 1	VATC1_HUMAN	200.89	1030	7.65026
P21291	CSRP1	Cysteine and glycine-rich protein 1	CSRP1_HUMAN	15692.4	567	13.9378				P21291	CSRP1	Cysteine and glycine-rich protein 1	CSRP1_HUMAN	1250.95	256	10.2888
P21333	FLNA	Filamin-A	FLNA_HUMAN	204152	36	17.6393				P21333	FLNA	Filamin-A	FLNA_HUMAN	3633.39	70	11.8271
P21399	ACO1	Cytoplasmic aconitate hydratase	ACOC_HUMAN	13023.5	663	13.6688				P21399	ACO1	Cytoplasmic aconitate hydratase	ACOC_HUMAN	321.57	833	8.32899
P21589	NT5E	5'-nucleotidase	5NTD_HUMAN	19331.1	472	14.2386				P21589	NT5E	5'-nucleotidase	5NTD_HUMAN	616.342	518	9.26759
P21796	VDAC1	Voltage-dependent anion-selective channel protein 1	VDAC1_HUMAN	11529.7	733	13.4931				P21796	VDAC1	Voltage-dependent anion-selective channel protein 1	VDAC1_HUMAN	545.402	578	9.09118
P21926	CD9	CD9 antigen	CD9_HUMAN	13637.9	638	13.7353				P21926	CD9	CD9 antigen	CD9_HUMAN	925.283	349	9.85375
P21980	TGM2	Protein-glutamine gamma-glutamyltransferase 2	TGM2_HUMAN	80206.2	105	16.2914				P21980	TGM2	Protein-glutamine gamma-glutamyltransferase 2	TGM2_HUMAN	1777.03	175	10.7952
P22059	OSBP	Oxysterol-binding protein 1	OSBP1_HUMAN	6432.6	993	12.6512				P22059	OSBP	Oxysterol-binding protein 1	OSBP1_HUMAN	127.517	1133	6.99454
P22061	PCMT1	Protein-L-isoaspartate(D-aspartate) O-methyltransferase	PIMT_HUMAN	14643.1	596	13.8379				P22061	PCMT1	Protein-L-isoaspartate(D-aspartate) O-methyltransferase	PIMT_HUMAN	641.846	493	9.32608
P22087	FBL	rRNA 2'-O-methyltransferase fibrillarin	FBRL_HUMAN	25758	362	14.6527				P22087	FBL	rRNA 2'-O-methyltransferase fibrillarin	FBRL_HUMAN	994.94	324	9.95847
P22102	GART	Trifunctional purine biosynthetic protein adenosine-3	PUR2_HUMAN	34680.1	273	15.0818				P22102	GART	Trifunctional purine biosynthetic protein adenosine-3	PUR2_HUMAN	1140.85	283	10.1559
P22234	PAICS	Multifunctional protein ADE2	PUR6_HUMAN	32369.1	290	14.9823				P22234	PAICS	Multifunctional protein ADE2	PUR6_HUMAN	839.514	381	9.71341
P22307	SCP2	Non-specific lipid-transfer protein	NLTP_HUMAN	7621.06	926	12.8958				P22307	SCP2	Non-specific lipid-transfer protein	NLTP_HUMAN	559.957	565	9.12917
P22314	UBA1	Ubiquitin-like modifier-activating enzyme 1	UBA1_HUMAN	40317.6	238	15.2991				P22314	UBA1	Ubiquitin-like modifier-activating enzyme 1	UBA1_HUMAN	1003.49	322	9.97081
P22626	HNRNPA2B1	Heterogeneous nuclear ribonucleoproteins A2/B1	ROA2_HUMAN	228435	29	17.8014				P22626	HNRNPA2B1	Heterogeneous nuclear ribonucleoproteins A2/B1	ROA2_HUMAN	5850.51	40	12.5143
P23193	TCEA1	Transcription elongation factor A protein 1	TCEA1_HUMAN	4260.06	1124	12.0567				P23193	TCEA1	Transcription elongation factor A protein 1	TCEA1_HUMAN	228.358	981	7.83515
P23229	ITGA6	Integrin alpha-6	ITA6_HUMAN	5056.85	1083	12.304				P23229	ITGA6	Integrin alpha-6	ITA6_HUMAN	119.545	1147	6.90141
P23246	SFPQ	Splicing factor, proline- and glutamine-rich	SFPQ_HUMAN	46265.8	203	15.4977				P23246	SFPQ	Splicing factor, proline- and glutamine-rich	SFPQ_HUMAN	1244.15	260	10.2809
P23258;Q9NRH3	TUBG1;TUBG2	Tubulin gamma-1 chain;Tubulin gamma-2 chain	TBG1_HUMAN;TBG2_HUMAN	11457.5	737	13.484				P23258;Q9NRH3	TUBG1;TUBG2	Tubulin gamma-1 chain;Tubulin gamma-2 chain	TBG1_HUMAN;TBG2_HUMAN	238.363	964	7.89702
P23284	PPIB	Peptidyl-prolyl cis-trans isomerase B	PPIB_HUMAN	18480.1	498	14.1737				P23284	PPIB	Peptidyl-prolyl cis-trans isomerase B	PPIB_HUMAN	1167.76	275	10.1895
P23381	WARS	Tryptophan--tRNA ligase, cytoplasmic	SYWC_HUMAN	3389.95	1150	11.727				P23381	WARS	Tryptophan--tRNA ligase, cytoplasmic	SYWC_HUMAN	635.359	498	9.31143
P23396	RPS3	40S ribosomal protein S3	RS3_HUMAN	68613.6	125	16.0662				P23396	RPS3	40S ribosomal protein S3	RS3_HUMAN	2368.86	119	11.21
P23526	AHCY	Adenosylhomocysteinase	SAHH_HUMAN	52899.9	170	15.691				P23526	AHCY	Adenosylhomocysteinase	SAHH_HUMAN	2311.57	120	11.1747
P23528	CFL1	Cofilin-1	COF1_HUMAN	269601	24	18.0405				P23528	CFL1	Cofilin-1	COF1_HUMAN	6309.35	37	12.6233
P23588	EIF4B	Eukaryotic translation initiation factor 4B	IF4B_HUMAN	21979.7	409	14.4239				P23588	EIF4B	Eukaryotic translation initiation factor 4B	IF4B_HUMAN	974.315	332	9.92824
P23919	DTYMK	Thymidylate kinase	KTHY_HUMAN	16232.2	549	13.9866				P23919	DTYMK	Thymidylate kinase	KTHY_HUMAN	574.819	548	9.16696
P24534	EEF1B2	Elongation factor 1-beta	EF1B_HUMAN	75360.6	113	16.2015				P24534	EEF1B2	Elongation factor 1-beta	EF1B_HUMAN	3379.06	74	11.7224
P24752	ACAT1	Acetyl-CoA acetyltransferase, mitochondrial	THIL_HUMAN	8770.41	856	13.0984				P24752	ACAT1	Acetyl-CoA acetyltransferase, mitochondrial	THIL_HUMAN	665.334	477	9.37794
P24844	MYL9	Myosin regulatory light polypeptide 9	MYL9_HUMAN	56060.3	162	15.7747				P24844	MYL9	Myosin regulatory light polypeptide 9	MYL9_HUMAN	2087.32	142	11.0274
P25205	MCM3	DNA replication licensing factor MCM3	MCM3_HUMAN	12186.9	712	13.573				P25205	MCM3	DNA replication licensing factor MCM3	MCM3_HUMAN	429.551	699	8.74668
P25398	RPS12	40S ribosomal protein S12	RS12_HUMAN	86844.7	92	16.4062				P25398	RPS12	40S ribosomal protein S12	RS12_HUMAN	3113.95	86	11.6045
P25685	DNAJB1	DnaJ homolog subfamily B member 1	DNJB1_HUMAN	12453.3	696	13.6042				P25685	DNAJB1	DnaJ homolog subfamily B member 1	DNJB1_HUMAN	419.194	712	8.71147
P25705	ATP5F1A	ATP synthase subunit alpha, mitochondrial	ATPA_HUMAN	61710.5	141	15.9132				P25705	ATP5F1A	ATP synthase subunit alpha, mitochondrial	ATPA_HUMAN	1655.85	186	10.6934
P25786	PSMA1	Proteasome subunit alpha type-1	PSA1_HUMAN	12186.9	711	13.573				P25786	PSMA1	Proteasome subunit alpha type-1	PSA1_HUMAN	943.935	340	9.88254
P25787	PSMA2	Proteasome subunit alpha type-2	PSA2_HUMAN	21913.1	415	14.4195				P25787	PSMA2	Proteasome subunit alpha type-2	PSA2_HUMAN	725.988	434	9.5038
P25788	PSMA3	Proteasome subunit alpha type-3	PSA3_HUMAN	43265.4	224	15.4009				P25788	PSMA3	Proteasome subunit alpha type-3	PSA3_HUMAN	1040.18	308	10.0226
P25789	PSMA4	Proteasome subunit alpha type-4	PSA4_HUMAN	36039.9	262	15.1373				P25789	PSMA4	Proteasome subunit alpha type-4	PSA4_HUMAN	1737.41	179	10.7627
P26006	ITGA3	Integrin alpha-3	ITA3_HUMAN	30630.1	314	14.9027				P26006	ITGA3	Integrin alpha-3	ITA3_HUMAN	1564.81	199	10.6118
P26038	MSN	Moesin	MOES_HUMAN	71423.5	120	16.1241				P26038	MSN	Moesin	MOES_HUMAN	1806.24	169	10.8188
P26358	DNMT1	DNA (cytosine-5)-methyltransferase 1	DNMT1_HUMAN	12921.4	668	13.6575				P26358	DNMT1	DNA (cytosine-5)-methyltransferase 1	DNMT1_HUMAN	353.571	789	8.46586
P26368	U2AF2	Splicing factor U2AF 65 kDa subunit	U2AF2_HUMAN	13942.5	625	13.7672				P26368	U2AF2	Splicing factor U2AF 65 kDa subunit	U2AF2_HUMAN	246.545	951	7.94571
P26373	RPL13	60S ribosomal protein L13	RL13_HUMAN	76031.8	112	16.2143				P26373	RPL13	60S ribosomal protein L13	RL13_HUMAN	2581.58	104	11.334
P26447	S100A4	Protein S100-A4	S10A4_HUMAN	49635.1	185	15.5991				P26447	S100A4	Protein S100-A4	S10A4_HUMAN	1510.37	204	10.5607
P26583	HMGB2	High mobility group protein B2	HMGB2_HUMAN	20107.4	456	14.2954				P26583	HMGB2	High mobility group protein B2	HMGB2_HUMAN	894.074	355	9.80425
P26599	PTBP1	Polypyrimidine tract-binding protein 1	PTBP1_HUMAN	49566.6	187	15.5971				P26599	PTBP1	Polypyrimidine tract-binding protein 1	PTBP1_HUMAN	1764.73	178	10.7852
P26639	TARS	Threonine--tRNA ligase, cytoplasmic	SYTC_HUMAN	44818.8	209	15.4518				P26639	TARS	Threonine--tRNA ligase, cytoplasmic	SYTC_HUMAN	1104.13	292	10.1087
P26640	VARS	Valine--tRNA ligase	SYVC_HUMAN	10888.7	762	13.4105				P26640	VARS	Valine--tRNA ligase	SYVC_HUMAN	566.89	558	9.14692
P26641	EEF1G	Elongation factor 1-gamma	EF1G_HUMAN	38361.5	245	15.2274				P26641	EEF1G	Elongation factor 1-gamma	EF1G_HUMAN	4192.81	59	12.0337
P27348	YWHAQ	14-3-3 protein theta	1433T_HUMAN	42059.2	231	15.3601				P27348	YWHAQ	14-3-3 protein theta	1433T_HUMAN	1084.45	296	10.0828
P27635	RPL10	60S ribosomal protein L10	RL10_HUMAN	19557.8	463	14.2555				P27635	RPL10	60S ribosomal protein L10	RL10_HUMAN	549.457	576	9.10186
P27694	RPA1	Replication protein A 70 kDa DNA-binding subunit	RFA1_HUMAN	5924.75	1028	12.5325				P27694	RPA1	Replication protein A 70 kDa DNA-binding subunit	RFA1_HUMAN	403.765	733	8.65737
P27695	APEX1	DNA-(apurinic or apyrimidinic site) lyase	APEX1_HUMAN	20368.5	445	14.3141				P27695	APEX1	DNA-(apurinic or apyrimidinic site) lyase	APEX1_HUMAN	641.685	494	9.32572
P27707	DCK	Deoxycytidine kinase	DCK_HUMAN	4723.64	1101	12.2057				P27707	DCK	Deoxycytidine kinase	DCK_HUMAN	114.243	1152	6.83597
P27708	CAD	CAD protein	PYR1_HUMAN	12729.2	680	13.6359				P27708	CAD	CAD protein	PYR1_HUMAN	339.849	805	8.40875
P27797	CALR	Calreticulin	CALR_HUMAN	19325.2	473	14.2382				P27797	CALR	Calreticulin	CALR_HUMAN	721.871	436	9.4956
P27816	MAP4	Microtubule-associated protein 4	MAP4_HUMAN	15717	566	13.94				P27816	MAP4	Microtubule-associated protein 4	MAP4_HUMAN	671.413	470	9.39106
P27824	CANX	Calnexin	CALX_HUMAN	18115.3	510	14.1449				P27824	CANX	Calnexin	CALX_HUMAN	572.729	549	9.16171
P28065	PSMB9	Proteasome subunit beta type-9	PSB9_HUMAN	3495.62	1146	11.7713				P28065	PSMB9	Proteasome subunit beta type-9	PSB9_HUMAN	131.722	1126	7.04136
P28066	PSMA5	Proteasome subunit alpha type-5	PSA5_HUMAN	43925.3	216	15.4228				P28066	PSMA5	Proteasome subunit alpha type-5	PSA5_HUMAN	1666.63	185	10.7027
P28070	PSMB4	Proteasome subunit beta type-4	PSB4_HUMAN	38841.2	243	15.2453				P28070	PSMB4	Proteasome subunit beta type-4	PSB4_HUMAN	938.409	343	9.87407
P28072	PSMB6	Proteasome subunit beta type-6	PSB6_HUMAN	52377.5	172	15.6767				P28072	PSMB6	Proteasome subunit beta type-6	PSB6_HUMAN	1642.3	188	10.6815
P28074	PSMB5	Proteasome subunit beta type-5	PSB5_HUMAN	16799.5	542	14.0361				P28074	PSMB5	Proteasome subunit beta type-5	PSB5_HUMAN	589.61	537	9.20362
P28482	MAPK1	Mitogen-activated protein kinase 1	MK01_HUMAN	12760.5	678	13.6394				P28482	MAPK1	Mitogen-activated protein kinase 1	MK01_HUMAN	488.957	632	8.93356
P28838	LAP3	Cytosol aminopeptidase	AMPL_HUMAN	17031	535	14.0559				P28838	LAP3	Cytosol aminopeptidase	AMPL_HUMAN	475.072	646	8.892
P29034	S100A2	Protein S100-A2	S10A2_HUMAN	30055.3	319	14.8753				P29034	S100A2	Protein S100-A2	S10A2_HUMAN	1107.04	291	10.1125
P29317	EPHA2	Ephrin type-A receptor 2	EPHA2_HUMAN	59714.6	153	15.8658				P29317	EPHA2	Ephrin type-A receptor 2	EPHA2_HUMAN	496.251	628	8.95493
P29401	TKT	Transketolase	TKT_HUMAN	93114.1	84	16.5067				P29401	TKT	Transketolase	TKT_HUMAN	2929.31	90	11.5163
P29692	EEF1D	Elongation factor 1-delta	EF1D_HUMAN	150011	51	17.1947				P29692	EEF1D	Elongation factor 1-delta	EF1D_HUMAN	3919.73	63	11.9365
P29966	MARCKS	Myristoylated alanine-rich C-kinase substrate	MARCS_HUMAN	20185.4	451	14.301				P29966	MARCKS	Myristoylated alanine-rich C-kinase substrate	MARCS_HUMAN	1006.52	320	9.97516
P30040	ERP29	Endoplasmic reticulum resident protein 29	ERP29_HUMAN	19104.6	482	14.2216				P30040	ERP29	Endoplasmic reticulum resident protein 29	ERP29_HUMAN	218.376	996	7.77067
P30041	PRDX6	Peroxiredoxin-6	PRDX6_HUMAN	61265.7	146	15.9028				P30041	PRDX6	Peroxiredoxin-6	PRDX6_HUMAN	1815.27	166	10.826
P30044	PRDX5	Peroxiredoxin-5, mitochondrial	PRDX5_HUMAN	19180.6	477	14.2274				P30044	PRDX5	Peroxiredoxin-5, mitochondrial	PRDX5_HUMAN	1773.06	176	10.792
P30046	DDT	D-dopachrome decarboxylase	DOPD_HUMAN	15187	576	13.8906				P30046	DDT	D-dopachrome decarboxylase	DOPD_HUMAN	524.755	597	9.0355
P30048	PRDX3	Thioredoxin-dependent peroxide reductase, mitochondrial	PRDX3_HUMAN	28924.4	330	14.82				P30048	PRDX3	Thioredoxin-dependent peroxide reductase, mitochondrial	PRDX3_HUMAN	1171.7	274	10.1944
P30049	ATP5F1D	ATP synthase subunit delta, mitochondrial	ATPD_HUMAN	9313.42	829	13.1851				P30049	ATP5F1D	ATP synthase subunit delta, mitochondrial	ATPD_HUMAN	751.424	420	9.55348
P30050	RPL12	60S ribosomal protein L12	RL12_HUMAN	85439.1	95	16.3826				P30050	RPL12	60S ribosomal protein L12	RL12_HUMAN	2417.1	115	11.2391
P30084	ECHS1	Enoyl-CoA hydratase, mitochondrial	ECHM_HUMAN	4699.62	1105	12.1983				P30084	ECHS1	Enoyl-CoA hydratase, mitochondrial	ECHM_HUMAN	146.383	1109	7.19361
P30086	PEBP1	Phosphatidylethanolamine-binding protein 1	PEBP1_HUMAN	41522.5	234	15.3416				P30086	PEBP1	Phosphatidylethanolamine-binding protein 1	PEBP1_HUMAN	1597.85	194	10.6419
P30101	PDIA3	Protein disulfide-isomerase A3	PDIA3_HUMAN	49582.2	186	15.5975				P30101	PDIA3	Protein disulfide-isomerase A3	PDIA3_HUMAN	2246.26	125	11.1333
P30153	PPP2R1A	Serine/threonine-protein phosphatase 2A 65 kDa regulatory subunit A alpha isoform	2AAA_HUMAN	20329.9	446	14.3113				P30153	PPP2R1A	Serine/threonine-protein phosphatase 2A 65 kDa regulatory subunit A alpha isoform	2AAA_HUMAN	789.353	400	9.62453
P30419	NMT1	Glycylpeptide N-tetradecanoyltransferase 1	NMT1_HUMAN	6973.66	967	12.7677				P30419	NMT1	Glycylpeptide N-tetradecanoyltransferase 1	NMT1_HUMAN	197.131	1036	7.62301
P30520	ADSS	Adenylosuccinate synthetase isozyme 2	PURA2_HUMAN	7624.37	925	12.8964				P30520	ADSS	Adenylosuccinate synthetase isozyme 2	PURA2_HUMAN	274.797	904	8.10222
P30530	AXL	Tyrosine-protein kinase receptor UFO	UFO_HUMAN	6461.95	992	12.6578				P30530	AXL	Tyrosine-protein kinase receptor UFO	UFO_HUMAN	184.771	1055	7.52959
P30566	ADSL	Adenylosuccinate lyase	PUR8_HUMAN	5260.16	1068	12.3609				P30566	ADSL	Adenylosuccinate lyase	PUR8_HUMAN	319.894	835	8.32145
P30626	SRI	Sorcin	SORCN_HUMAN	25408.8	363	14.633				P30626	SRI	Sorcin	SORCN_HUMAN	526.091	595	9.03917
P30876	POLR2B	DNA-directed RNA polymerase II subunit RPB2	RPB2_HUMAN	4267.02	1123	12.059				P30876	POLR2B	DNA-directed RNA polymerase II subunit RPB2	RPB2_HUMAN	91.1036	1169	6.50944
P31040	SDHA	Succinate dehydrogenase [ubiquinone] flavoprotein subunit, mitochondrial	SDHA_HUMAN	9005.42	846	13.1366				P31040	SDHA	Succinate dehydrogenase [ubiquinone] flavoprotein subunit, mitochondrial	SDHA_HUMAN	175.976	1068	7.45923
P31153	MAT2A	S-adenosylmethionine synthase isoform type-2	METK2_HUMAN	8452.08	873	13.0451				P31153	MAT2A	S-adenosylmethionine synthase isoform type-2	METK2_HUMAN	332.55	820	8.37743
P31350	RRM2	Ribonucleoside-diphosphate reductase subunit M2	RIR2_HUMAN	4207.06	1127	12.0386				P31350	RRM2	Ribonucleoside-diphosphate reductase subunit M2	RIR2_HUMAN	458.309	667	8.84018
P31689	DNAJA1	DnaJ homolog subfamily A member 1	DNJA1_HUMAN	4560.21	1111	12.1549				P31689	DNAJA1	DnaJ homolog subfamily A member 1	DNJA1_HUMAN	1513.19	203	10.5634
P31930	UQCRC1	Cytochrome b-c1 complex subunit 1, mitochondrial	QCR1_HUMAN	12718	682	13.6346				P31930	UQCRC1	Cytochrome b-c1 complex subunit 1, mitochondrial	QCR1_HUMAN	371.484	764	8.53716
P31939	ATIC	Bifunctional purine biosynthesis protein PURH	PUR9_HUMAN	26753	354	14.7074				P31939	ATIC	Bifunctional purine biosynthesis protein PURH	PUR9_HUMAN	773.198	406	9.59469
P31942	HNRNPH3	Heterogeneous nuclear ribonucleoprotein H3	HNRH3_HUMAN	14531.5	601	13.8269				P31942	HNRNPH3	Heterogeneous nuclear ribonucleoprotein H3	HNRH3_HUMAN	742.401	424	9.53605
P31943	HNRNPH1	Heterogeneous nuclear ribonucleoprotein H	HNRH1_HUMAN	37886.5	248	15.2094				P31943	HNRNPH1	Heterogeneous nuclear ribonucleoprotein H	HNRH1_HUMAN	1263.97	254	10.3037
P31946	YWHAB	14-3-3 protein beta/alpha	1433B_HUMAN	143867	53	17.1344				P31946	YWHAB	14-3-3 protein beta/alpha	1433B_HUMAN	4208.25	58	12.039
P31947	SFN	14-3-3 protein sigma	1433S_HUMAN	20459.7	444	14.3205				P31947	SFN	14-3-3 protein sigma	1433S_HUMAN	446.76	679	8.80336
P31948	STIP1	Stress-induced-phosphoprotein 1	STIP1_HUMAN	48754.4	192	15.5732				P31948	STIP1	Stress-induced-phosphoprotein 1	STIP1_HUMAN	1573.64	198	10.6199
P31949	S100A11	Protein S100-A11	S10AB_HUMAN	72728.8	117	16.1502				P31949	S100A11	Protein S100-A11	S10AB_HUMAN	2734.57	95	11.4171
P32119	PRDX2	Peroxiredoxin-2	PRDX2_HUMAN	8392.69	876	13.0349				P32119	PRDX2	Peroxiredoxin-2	PRDX2_HUMAN	1244.63	258	10.2815
P32969	RPL9	60S ribosomal protein L9	RL9_HUMAN	38860.9	242	15.246				P32969	RPL9	60S ribosomal protein L9	RL9_HUMAN	1214.82	267	10.2465
P33176	KIF5B	Kinesin-1 heavy chain	KINH_HUMAN	29475.5	322	14.8472				P33176	KIF5B	Kinesin-1 heavy chain	KINH_HUMAN	792.775	397	9.63077
P33240	CSTF2	Cleavage stimulation factor subunit 2	CSTF2_HUMAN	8952.54	847	13.1281				P33240	CSTF2	Cleavage stimulation factor subunit 2	CSTF2_HUMAN	217.419	998	7.76433
P33316	DUT	Deoxyuridine 5'-triphosphate nucleotidohydrolase, mitochondrial	DUT_HUMAN	47261	198	15.5284				P33316	DUT	Deoxyuridine 5'-triphosphate nucleotidohydrolase, mitochondrial	DUT_HUMAN	728.251	430	9.50829
P33991	MCM4	DNA replication licensing factor MCM4	MCM4_HUMAN	15162.7	578	13.8882				P33991	MCM4	DNA replication licensing factor MCM4	MCM4_HUMAN	589.247	539	9.20273
P33992	MCM5	DNA replication licensing factor MCM5	MCM5_HUMAN	11786.2	721	13.5248				P33992	MCM5	DNA replication licensing factor MCM5	MCM5_HUMAN	1840.79	161	10.8461
P33993	MCM7	DNA replication licensing factor MCM7	MCM7_HUMAN	7515.36	936	12.8756				P33993	MCM7	DNA replication licensing factor MCM7	MCM7_HUMAN	453.601	676	8.82528
P34897	SHMT2	Serine hydroxymethyltransferase, mitochondrial	GLYM_HUMAN	43647.3	221	15.4136				P34897	SHMT2	Serine hydroxymethyltransferase, mitochondrial	GLYM_HUMAN	1273.99	249	10.3151
P34932	HSPA4	Heat shock 70 kDa protein 4	HSP74_HUMAN	22814.8	394	14.4777				P34932	HSPA4	Heat shock 70 kDa protein 4	HSP74_HUMAN	667.806	471	9.38329
P35221	CTNNA1	Catenin alpha-1	CTNA1_HUMAN	14640.6	597	13.8377				P35221	CTNNA1	Catenin alpha-1	CTNA1_HUMAN	474.125	649	8.88912
P35232	PHB	Prohibitin	PHB_HUMAN	34981.9	268	15.0943				P35232	PHB	Prohibitin	PHB_HUMAN	1273.3	250	10.3144
P35237	SERPINB6	Serpin B6	SPB6_HUMAN	13834.7	632	13.756				P35237	SERPINB6	Serpin B6	SPB6_HUMAN	314.647	844	8.29759
P35241	RDX	Radixin	RADI_HUMAN	62164.2	139	15.9238				P35241	RDX	Radixin	RADI_HUMAN	1448.19	216	10.5
P35244	RPA3	Replication protein A 14 kDa subunit	RFA3_HUMAN	6599.02	985	12.688				P35244	RPA3	Replication protein A 14 kDa subunit	RFA3_HUMAN	99.4402	1166	6.63576
P35249	RFC4	Replication factor C subunit 4	RFC4_HUMAN	5128.04	1076	12.3242				P35249	RFC4	Replication factor C subunit 4	RFC4_HUMAN	208.624	1010	7.70476
P35250	RFC2	Replication factor C subunit 2	RFC2_HUMAN	11003.3	756	13.4256				P35250	RFC2	Replication factor C subunit 2	RFC2_HUMAN	359.476	779	8.48975
P35268	RPL22	60S ribosomal protein L22	RL22_HUMAN	156913	48	17.2596				P35268	RPL22	60S ribosomal protein L22	RL22_HUMAN	5825.02	41	12.508
P35269	GTF2F1	General transcription factor IIF subunit 1	T2FA_HUMAN	5845.04	1035	12.513				P35269	GTF2F1	General transcription factor IIF subunit 1	T2FA_HUMAN	225.62	985	7.81775
P35579	MYH9	Myosin-9	MYH9_HUMAN	80814.1	103	16.3023				P35579	MYH9	Myosin-9	MYH9_HUMAN	3346.79	76	11.7086
P35606	COPB2	Coatomer subunit beta'	COPB2_HUMAN	4400.62	1118	12.1035				P35606	COPB2	Coatomer subunit beta'	COPB2_HUMAN	397.016	739	8.63305
P35613	BSG	Basigin	BASI_HUMAN	36195.2	259	15.1435				P35613	BSG	Basigin	BASI_HUMAN	2492.3	111	11.2833
P35637	FUS	RNA-binding protein FUS	FUS_HUMAN	14203.8	617	13.794				P35637	FUS	RNA-binding protein FUS	FUS_HUMAN	2125.88	138	11.0538
P35659	DEK	Protein DEK	DEK_HUMAN	12913.8	669	13.6566				P35659	DEK	Protein DEK	DEK_HUMAN	389.156	746	8.6042
P35998	PSMC2	26S proteasome regulatory subunit 7	PRS7_HUMAN	34517.5	275	15.075				P35998	PSMC2	26S proteasome regulatory subunit 7	PRS7_HUMAN	708.23	448	9.46807
P36507	MAP2K2	Dual specificity mitogen-activated protein kinase kinase 2	MP2K2_HUMAN	7904.28	907	12.9484				P36507	MAP2K2	Dual specificity mitogen-activated protein kinase kinase 2	MP2K2_HUMAN	355.495	785	8.47368
P36542	ATP5F1C	ATP synthase subunit gamma, mitochondrial	ATPG_HUMAN	9999.41	802	13.2876				P36542	ATP5F1C	ATP synthase subunit gamma, mitochondrial	ATPG_HUMAN	327.413	827	8.35497
P36551	CPOX	Oxygen-dependent coproporphyrinogen-III oxidase, mitochondrial	HEM6_HUMAN	31224.7	307	14.9304				P36551	CPOX	Oxygen-dependent coproporphyrinogen-III oxidase, mitochondrial	HEM6_HUMAN	285.257	887	8.15612
P36578	RPL4	60S ribosomal protein L4	RL4_HUMAN	26544.6	357	14.6961				P36578	RPL4	60S ribosomal protein L4	RL4_HUMAN	2184.43	132	11.093
P36871	PGM1	Phosphoglucomutase-1	PGM1_HUMAN	14912.1	588	13.8642				P36871	PGM1	Phosphoglucomutase-1	PGM1_HUMAN	636.046	497	9.31299
P36873	PPP1CC	Serine/threonine-protein phosphatase PP1-gamma catalytic subunit	PP1G_HUMAN	15992.2	556	13.9651				P36873	PPP1CC	Serine/threonine-protein phosphatase PP1-gamma catalytic subunit	PP1G_HUMAN	843.378	378	9.72003
P37108	SRP14	Signal recognition particle 14 kDa protein	SRP14_HUMAN	5119	1078	12.3216				P37108	SRP14	Signal recognition particle 14 kDa protein	SRP14_HUMAN	191.043	1047	7.57776
P37198	NUP62	Nuclear pore glycoprotein p62	NUP62_HUMAN	5792.99	1037	12.5001				P37198	NUP62	Nuclear pore glycoprotein p62	NUP62_HUMAN	198.968	1031	7.63639
P37802	TAGLN2	Transgelin-2	TAGL2_HUMAN	31999.6	296	14.9658				P37802	TAGLN2	Transgelin-2	TAGL2_HUMAN	1133.5	286	10.1466
P37837	TALDO1	Transaldolase	TALDO_HUMAN	61168.7	148	15.9005				P37837	TALDO1	Transaldolase	TALDO_HUMAN	1300.01	243	10.3443
P38117	ETFB	Electron transfer flavoprotein subunit beta	ETFB_HUMAN	11690	726	13.513				P38117	ETFB	Electron transfer flavoprotein subunit beta	ETFB_HUMAN	277.717	897	8.11747
P38159	RBMX	RNA-binding motif protein, X chromosome	RBMX_HUMAN	26982.5	352	14.7197				P38159	RBMX	RNA-binding motif protein, X chromosome	RBMX_HUMAN	1113.54	290	10.1209
P38606	ATP6V1A	V-type proton ATPase catalytic subunit A	VATA_HUMAN	29279.5	324	14.8376				P38606	ATP6V1A	V-type proton ATPase catalytic subunit A	VATA_HUMAN	255.528	932	7.99734
P38646	HSPA9	Stress-70 protein, mitochondrial	GRP75_HUMAN	27608.9	341	14.7528				P38646	HSPA9	Stress-70 protein, mitochondrial	GRP75_HUMAN	1229.42	264	10.2638
P38919	EIF4A3	Eukaryotic initiation factor 4A-III	IF4A3_HUMAN	17524.9	521	14.0971				P38919	EIF4A3	Eukaryotic initiation factor 4A-III	IF4A3_HUMAN	624.49	508	9.28654
P39019	RPS19	40S ribosomal protein S19	RS19_HUMAN	94122.9	82	16.5223				P39019	RPS19	40S ribosomal protein S19	RS19_HUMAN	2560.45	107	11.3222
P39023	RPL3	60S ribosomal protein L3	RL3_HUMAN	36548.2	256	15.1575				P39023	RPL3	60S ribosomal protein L3	RL3_HUMAN	973.983	333	9.92775
P39656	DDOST	Dolichyl-diphosphooligosaccharide--protein glycosyltransferase 48 kDa subunit	OST48_HUMAN	13468.3	643	13.7173				P39656	DDOST	Dolichyl-diphosphooligosaccharide--protein glycosyltransferase 48 kDa subunit	OST48_HUMAN	284.403	888	8.15179
P39687	ANP32A	Acidic leucine-rich nuclear phosphoprotein 32 family member A	AN32A_HUMAN	28667.4	332	14.8071				P39687	ANP32A	Acidic leucine-rich nuclear phosphoprotein 32 family member A	AN32A_HUMAN	1351.53	234	10.4004
P39748	FEN1	Flap endonuclease 1	FEN1_HUMAN	11713.5	724	13.5159				P39748	FEN1	Flap endonuclease 1	FEN1_HUMAN	291.434	877	8.18703
P40121	CAPG	Macrophage-capping protein	CAPG_HUMAN	16024.8	554	13.968				P40121	CAPG	Macrophage-capping protein	CAPG_HUMAN	671.422	469	9.39108
P40123	CAP2	Adenylyl cyclase-associated protein 2	CAP2_HUMAN	8059.83	899	12.9765				P40123	CAP2	Adenylyl cyclase-associated protein 2	CAP2_HUMAN	252.941	939	7.98266
P40222	TXLNA	Alpha-taxilin	TXLNA_HUMAN	7486.29	941	12.87				P40222	TXLNA	Alpha-taxilin	TXLNA_HUMAN	85.0485	1173	6.41021
P40227	CCT6A	T-complex protein 1 subunit zeta	TCPZ_HUMAN	209594	33	17.6772				P40227	CCT6A	T-complex protein 1 subunit zeta	TCPZ_HUMAN	1959.1	152	10.936
P40429	RPL13A	60S ribosomal protein L13a	RL13A_HUMAN	64302.2	137	15.9726				P40429	RPL13A	60S ribosomal protein L13a	RL13A_HUMAN	2204.18	130	11.106
P40925	MDH1	Malate dehydrogenase, cytoplasmic	MDHC_HUMAN	48051	194	15.5523				P40925	MDH1	Malate dehydrogenase, cytoplasmic	MDHC_HUMAN	1963.73	151	10.9394
P40926	MDH2	Malate dehydrogenase, mitochondrial	MDHM_HUMAN	53647.8	168	15.7112				P40926	MDH2	Malate dehydrogenase, mitochondrial	MDHM_HUMAN	1393.72	225	10.4447
P40938	RFC3	Replication factor C subunit 3	RFC3_HUMAN	4638.34	1107	12.1794				P40938	RFC3	Replication factor C subunit 3	RFC3_HUMAN	203.803	1024	7.67103
P41091	EIF2S3	Eukaryotic translation initiation factor 2 subunit 3	IF2G_HUMAN	8122.8	897	12.9878				P41091	EIF2S3	Eukaryotic translation initiation factor 2 subunit 3	IF2G_HUMAN	269.258	912	8.07284
P41227	NAA10	N-alpha-acetyltransferase 10	NAA10_HUMAN	4112.24	1131	12.0057				P41227	NAA10	N-alpha-acetyltransferase 10	NAA10_HUMAN	136.017	1121	7.08765
P41250	GARS	Glycine--tRNA ligase	GARS_HUMAN	42335.6	227	15.3696				P41250	GARS	Glycine--tRNA ligase	GARS_HUMAN	1604.03	192	10.6475
P41252	IARS	Isoleucine--tRNA ligase, cytoplasmic	SYIC_HUMAN	17111.8	532	14.0627				P41252	IARS	Isoleucine--tRNA ligase, cytoplasmic	SYIC_HUMAN	542.897	580	9.08453
P42166	TMPO	Lamina-associated polypeptide 2, isoform alpha	LAP2A_HUMAN	21560.6	423	14.3961				P42166	TMPO	Lamina-associated polypeptide 2, isoform alpha	LAP2A_HUMAN	688.237	458	9.42676
P42677	RPS27	40S ribosomal protein S27	RS27_HUMAN	24795.1	368	14.5978				P42677	RPS27	40S ribosomal protein S27	RS27_HUMAN	1205.35	269	10.2352
P42704	LRPPRC	Leucine-rich PPR motif-containing protein, mitochondrial	LPPRC_HUMAN	13271.2	653	13.696				P42704	LRPPRC	Leucine-rich PPR motif-containing protein, mitochondrial	LPPRC_HUMAN	505.942	626	8.98283
P42766	RPL35	60S ribosomal protein L35	RL35_HUMAN	97836.9	79	16.5781				P42766	RPL35	60S ribosomal protein L35	RL35_HUMAN	4263.06	57	12.0577
P43034	PAFAH1B1	Platelet-activating factor acetylhydrolase IB subunit alpha	LIS1_HUMAN	18676.5	491	14.1889				P43034	PAFAH1B1	Platelet-activating factor acetylhydrolase IB subunit alpha	LIS1_HUMAN	475.206	645	8.89241
P43243	MATR3	Matrin-3	MATR3_HUMAN	24033.1	376	14.5527				P43243	MATR3	Matrin-3	MATR3_HUMAN	768.309	410	9.58554
P43246	MSH2	DNA mismatch repair protein Msh2	MSH2_HUMAN	19352.3	471	14.2402				P43246	MSH2	DNA mismatch repair protein Msh2	MSH2_HUMAN	295.974	874	8.20932
P43307	SSR1	Translocon-associated protein subunit alpha	SSRA_HUMAN	18406.6	501	14.1679				P43307	SSR1	Translocon-associated protein subunit alpha	SSRA_HUMAN	979.867	329	9.93644
P43487	RANBP1	Ran-specific GTPase-activating protein	RANG_HUMAN	18597.1	495	14.1828				P43487	RANBP1	Ran-specific GTPase-activating protein	RANG_HUMAN	1075.36	300	10.0706
P43490	NAMPT	Nicotinamide phosphoribosyltransferase	NAMPT_HUMAN	33189.3	281	15.0184				P43490	NAMPT	Nicotinamide phosphoribosyltransferase	NAMPT_HUMAN	856.554	372	9.7424
P43686	PSMC4	26S proteasome regulatory subunit 6B	PRS6B_HUMAN	3230.92	1153	11.6577				P43686	PSMC4	26S proteasome regulatory subunit 6B	PRS6B_HUMAN	410.334	727	8.68066
P45880	VDAC2	Voltage-dependent anion-selective channel protein 2	VDAC2_HUMAN	15019.5	584	13.8745				P45880	VDAC2	Voltage-dependent anion-selective channel protein 2	VDAC2_HUMAN	752.649	419	9.55583
P45973	CBX5	Chromobox protein homolog 5	CBX5_HUMAN	19490.5	466	14.2505				P45973	CBX5	Chromobox protein homolog 5	CBX5_HUMAN	462.945	660	8.8547
P45974	USP5	Ubiquitin carboxyl-terminal hydrolase 5	UBP5_HUMAN	10700.6	770	13.3854				P45974	USP5	Ubiquitin carboxyl-terminal hydrolase 5	UBP5_HUMAN	204.648	1022	7.677
P46060	RANGAP1	Ran GTPase-activating protein 1	RAGP1_HUMAN	20734.1	439	14.3397				P46060	RANGAP1	Ran GTPase-activating protein 1	RAGP1_HUMAN	630.334	504	9.29997
P46087	NOP2	Probable 28S rRNA (cytosine(4447)-C(5))-methyltransferase	NOP2_HUMAN	7981.36	903	12.9624				P46087	NOP2	Probable 28S rRNA (cytosine(4447)-C(5))-methyltransferase	NOP2_HUMAN	120.176	1146	6.909
P46379	BAG6	Large proline-rich protein BAG6	BAG6_HUMAN	8525.81	866	13.0576				P46379	BAG6	Large proline-rich protein BAG6	BAG6_HUMAN	267.857	917	8.06532
P46459	NSF	Vesicle-fusing ATPase	NSF_HUMAN	6245.89	1002	12.6087				P46459	NSF	Vesicle-fusing ATPase	NSF_HUMAN	652.142	487	9.34904
P46776	RPL27A	60S ribosomal protein L27a	RL27A_HUMAN	119735	67	16.8695				P46776	RPL27A	60S ribosomal protein L27a	RL27A_HUMAN	2076.28	143	11.0198
P46777	RPL5	60S ribosomal protein L5	RL5_HUMAN	26634.5	355	14.701				P46777	RPL5	60S ribosomal protein L5	RL5_HUMAN	625.976	507	9.28996
P46779	RPL28	60S ribosomal protein L28	RL28_HUMAN	27738.1	339	14.7596				P46779	RPL28	60S ribosomal protein L28	RL28_HUMAN	981.446	328	9.93876
P46781	RPS9	40S ribosomal protein S9	RS9_HUMAN	78637.7	107	16.2629				P46781	RPS9	40S ribosomal protein S9	RS9_HUMAN	1492.17	209	10.5432
P46782	RPS5	40S ribosomal protein S5	RS5_HUMAN	29156.5	326	14.8315				P46782	RPS5	40S ribosomal protein S5	RS5_HUMAN	1538.39	200	10.5872
P46783	RPS10	40S ribosomal protein S10	RS10_HUMAN	23010.2	391	14.49				P46783	RPS10	40S ribosomal protein S10	RS10_HUMAN	540.17	582	9.07727
P46821	MAP1B	Microtubule-associated protein 1B	MAP1B_HUMAN	15065.9	581	13.879				P46821	MAP1B	Microtubule-associated protein 1B	MAP1B_HUMAN	435.855	692	8.7677
P46926	GNPDA1	Glucosamine-6-phosphate isomerase 1	GNPI1_HUMAN	7761.51	917	12.9221				P46926	GNPDA1	Glucosamine-6-phosphate isomerase 1	GNPI1_HUMAN	280.65	894	8.13263
P46940	IQGAP1	Ras GTPase-activating-like protein IQGAP1	IQGA1_HUMAN	32576	288	14.9915				P46940	IQGAP1	Ras GTPase-activating-like protein IQGAP1	IQGA1_HUMAN	642.679	491	9.32795
P46976	GYG1	Glycogenin-1	GLYG_HUMAN	8577.32	863	13.0663				P46976	GYG1	Glycogenin-1	GLYG_HUMAN	165.41	1084	7.3699
P47224	RABIF	Guanine nucleotide exchange factor MSS4	MSS4_HUMAN	7123.5	961	12.7984				P47224	RABIF	Guanine nucleotide exchange factor MSS4	MSS4_HUMAN	301.638	863	8.23668
P47755	CAPZA2	F-actin-capping protein subunit alpha-2	CAZA2_HUMAN	30353.6	317	14.8896				P47755	CAPZA2	F-actin-capping protein subunit alpha-2	CAZA2_HUMAN	314.688	843	8.29778
P47756	CAPZB	F-actin-capping protein subunit beta	CAPZB_HUMAN	22596.5	397	14.4638				P47756	CAPZB	F-actin-capping protein subunit beta	CAPZB_HUMAN	786.494	403	9.61929
P47813	EIF1AX	Eukaryotic translation initiation factor 1A, X-chromosomal	IF1AX_HUMAN	5537.6	1056	12.435				P47813	EIF1AX	Eukaryotic translation initiation factor 1A, X-chromosomal	IF1AX_HUMAN	150.084	1099	7.22963
P47897	QARS	Glutamine--tRNA ligase	SYQ_HUMAN	16220.3	550	13.9855				P47897	QARS	Glutamine--tRNA ligase	SYQ_HUMAN	605.232	529	9.24135
P47914	RPL29	60S ribosomal protein L29	RL29_HUMAN	39712.5	240	15.2773				P47914	RPL29	60S ribosomal protein L29	RL29_HUMAN	2237.55	128	11.1277
P48047	ATP5PO	ATP synthase subunit O, mitochondrial	ATPO_HUMAN	10258.2	793	13.3245				P48047	ATP5PO	ATP synthase subunit O, mitochondrial	ATPO_HUMAN	333.488	815	8.38149
P48444	ARCN1	Coatomer subunit delta	COPD_HUMAN	31910.6	298	14.9617				P48444	ARCN1	Coatomer subunit delta	COPD_HUMAN	1113.84	289	10.1213
P48507	GCLM	Glutamate--cysteine ligase regulatory subunit	GSH0_HUMAN	20865.6	434	14.3488				P48507	GCLM	Glutamate--cysteine ligase regulatory subunit	GSH0_HUMAN	876.581	366	9.77574
P48509	CD151	CD151 antigen	CD151_HUMAN	85386	96	16.3817				P48509	CD151	CD151 antigen	CD151_HUMAN	3162.31	82	11.6268
P48556	PSMD8	26S proteasome non-ATPase regulatory subunit 8	PSMD8_HUMAN	15864.9	559	13.9535				P48556	PSMD8	26S proteasome non-ATPase regulatory subunit 8	PSMD8_HUMAN	396.942	740	8.63278
P48637	GSS	Glutathione synthetase	GSHB_HUMAN	13814.6	633	13.7539				P48637	GSS	Glutathione synthetase	GSHB_HUMAN	468.705	657	8.87254
P48643	CCT5	T-complex protein 1 subunit epsilon	TCPE_HUMAN	62704.1	138	15.9363				P48643	CCT5	T-complex protein 1 subunit epsilon	TCPE_HUMAN	1596.81	195	10.641
P48739	PITPNB	Phosphatidylinositol transfer protein beta isoform	PIPNB_HUMAN	5120.07	1077	12.3219				P48739	PITPNB	Phosphatidylinositol transfer protein beta isoform	PIPNB_HUMAN	333.948	813	8.38348
P48960	CD97	CD97 antigen	CD97_HUMAN	6422.7	994	12.649				P48960	CD97	CD97 antigen	CD97_HUMAN	241.52	957	7.916
P49189	ALDH9A1	4-trimethylaminobutyraldehyde dehydrogenase	AL9A1_HUMAN	15430.5	573	13.9135				P49189	ALDH9A1	4-trimethylaminobutyraldehyde dehydrogenase	AL9A1_HUMAN	793.27	396	9.63167
P49207	RPL34	60S ribosomal protein L34	RL34_HUMAN	51565.8	177	15.6541				P49207	RPL34	60S ribosomal protein L34	RL34_HUMAN	877.59	365	9.7774
P49321	NASP	Nuclear autoantigenic sperm protein	NASP_HUMAN	25998.1	359	14.6661				P49321	NASP	Nuclear autoantigenic sperm protein	NASP_HUMAN	1029.51	313	10.0077
P49327	FASN	Fatty acid synthase	FAS_HUMAN	26548.8	356	14.6964				P49327	FASN	Fatty acid synthase	FAS_HUMAN	965.669	335	9.91538
P49368	CCT3	T-complex protein 1 subunit gamma	TCPG_HUMAN	67765.5	128	16.0483				P49368	CCT3	T-complex protein 1 subunit gamma	TCPG_HUMAN	1792.42	171	10.8077
P49411	TUFM	Elongation factor Tu, mitochondrial	EFTU_HUMAN	23396.4	383	14.514				P49411	TUFM	Elongation factor Tu, mitochondrial	EFTU_HUMAN	830.612	383	9.69803
P49458	SRP9	Signal recognition particle 9 kDa protein	SRP09_HUMAN	6574.1	988	12.6826				P49458	SRP9	Signal recognition particle 9 kDa protein	SRP09_HUMAN	334.455	812	8.38567
P49588	AARS	Alanine--tRNA ligase, cytoplasmic	SYAC_HUMAN	18212.8	507	14.1527				P49588	AARS	Alanine--tRNA ligase, cytoplasmic	SYAC_HUMAN	685.686	460	9.4214
P49589	CARS	Cysteine--tRNA ligase, cytoplasmic	SYCC_HUMAN	6736.11	978	12.7177				P49589	CARS	Cysteine--tRNA ligase, cytoplasmic	SYCC_HUMAN	349.415	791	8.4488
P49591	SARS	Serine--tRNA ligase, cytoplasmic	SYSC_HUMAN	20187.2	450	14.3011				P49591	SARS	Serine--tRNA ligase, cytoplasmic	SYSC_HUMAN	514.738	608	9.00769
P49593	PPM1F	Protein phosphatase 1F	PPM1F_HUMAN	7193.16	953	12.8124				P49593	PPM1F	Protein phosphatase 1F	PPM1F_HUMAN	404.012	731	8.65825
P49720	PSMB3	Proteasome subunit beta type-3	PSB3_HUMAN	6634.59	984	12.6958				P49720	PSMB3	Proteasome subunit beta type-3	PSB3_HUMAN	189.951	1049	7.56948
P49721	PSMB2	Proteasome subunit beta type-2	PSB2_HUMAN	12289.6	704	13.5851				P49721	PSMB2	Proteasome subunit beta type-2	PSB2_HUMAN	530.978	594	9.05251
P49736	MCM2	DNA replication licensing factor MCM2	MCM2_HUMAN	12514.5	693	13.6113				P49736	MCM2	DNA replication licensing factor MCM2	MCM2_HUMAN	521.863	604	9.02753
P49748	ACADVL	Very long-chain specific acyl-CoA dehydrogenase, mitochondrial	ACADV_HUMAN	8791.02	854	13.1018				P49748	ACADVL	Very long-chain specific acyl-CoA dehydrogenase, mitochondrial	ACADV_HUMAN	208.589	1011	7.70452
P49756	RBM25	RNA-binding protein 25	RBM25_HUMAN	9463.32	822	13.2081				P49756	RBM25	RNA-binding protein 25	RBM25_HUMAN	322.551	832	8.33338
P49773	HINT1	Histidine triad nucleotide-binding protein 1	HINT1_HUMAN	37788.2	249	15.2056				P49773	HINT1	Histidine triad nucleotide-binding protein 1	HINT1_HUMAN	883.546	361	9.78716
P49792	RANBP2	E3 SUMO-protein ligase RanBP2	RBP2_HUMAN	3412.45	1149	11.7366				P49792	RANBP2	E3 SUMO-protein ligase RanBP2	RBP2_HUMAN	251.504	945	7.97444
P49915	GMPS	GMP synthase [glutamine-hydrolyzing]	GUAA_HUMAN	8683.69	859	13.0841				P49915	GMPS	GMP synthase [glutamine-hydrolyzing]	GUAA_HUMAN	206.014	1018	7.6866
P50281	MMP14	Matrix metalloproteinase-14	MMP14_HUMAN	14645.7	595	13.8382				P50281	MMP14	Matrix metalloproteinase-14	MMP14_HUMAN	428.456	700	8.743
P50395	GDI2	Rab GDP dissociation inhibitor beta	GDIB_HUMAN	65606.2	134	16.0015				P50395	GDI2	Rab GDP dissociation inhibitor beta	GDIB_HUMAN	976.022	331	9.93077
P50453	SERPINB9	Serpin B9	SPB9_HUMAN	8154.85	894	12.9934				P50453	SERPINB9	Serpin B9	SPB9_HUMAN	346.841	797	8.43813
P50454	SERPINH1	Serpin H1	SERPH_HUMAN	16977	536	14.0513				P50454	SERPINH1	Serpin H1	SERPH_HUMAN	508.32	619	8.98959
P50502	ST13	Hsc70-interacting protein	F10A1_HUMAN	9150.87	839	13.1597				P50502	ST13	Hsc70-interacting protein	F10A1_HUMAN	231.896	975	7.85733
P50552	VASP	Vasodilator-stimulated phosphoprotein	VASP_HUMAN	11273.1	744	13.4606				P50552	VASP	Vasodilator-stimulated phosphoprotein	VASP_HUMAN	525.225	596	9.03679
P50570	DNM2	Dynamin-2	DYN2_HUMAN	11480.7	735	13.4869				P50570	DNM2	Dynamin-2	DYN2_HUMAN	300.882	866	8.23305
P50579	METAP2	Methionine aminopeptidase 2	MAP2_HUMAN	30686.9	313	14.9053				P50579	METAP2	Methionine aminopeptidase 2	MAP2_HUMAN	1083.48	297	10.0815
P50914	RPL14	60S ribosomal protein L14	RL14_HUMAN	34991.3	267	15.0947				P50914	RPL14	60S ribosomal protein L14	RL14_HUMAN	3142.05	83	11.6175
P50990	CCT8	T-complex protein 1 subunit theta	TCPQ_HUMAN	72469.2	118	16.1451				P50990	CCT8	T-complex protein 1 subunit theta	TCPQ_HUMAN	1003.88	321	9.97137
P50991	CCT4	T-complex protein 1 subunit delta	TCPD_HUMAN	84176	99	16.3611				P50991	CCT4	T-complex protein 1 subunit delta	TCPD_HUMAN	2272.73	122	11.1502
P50995	ANXA11	Annexin A11	ANX11_HUMAN	14373	612	13.8111				P50995	ANXA11	Annexin A11	ANX11_HUMAN	634.038	500	9.30842
P51114	FXR1	Fragile X mental retardation syndrome-related protein 1	FXR1_HUMAN	15589.3	568	13.9283				P51114	FXR1	Fragile X mental retardation syndrome-related protein 1	FXR1_HUMAN	486.891	634	8.92746
P51116	FXR2	Fragile X mental retardation syndrome-related protein 2	FXR2_HUMAN	22714.3	395	14.4713				P51116	FXR2	Fragile X mental retardation syndrome-related protein 2	FXR2_HUMAN	1095.63	293	10.0975
P51148	RAB5C	Ras-related protein Rab-5C	RAB5C_HUMAN	22548.4	399	14.4607				P51148	RAB5C	Ras-related protein Rab-5C	RAB5C_HUMAN	824.552	384	9.68747
P51149	RAB7A	Ras-related protein Rab-7a	RAB7A_HUMAN	31424.8	305	14.9396				P51149	RAB7A	Ras-related protein Rab-7a	RAB7A_HUMAN	995.855	323	9.95979
P51452	DUSP3	Dual specificity protein phosphatase 3	DUS3_HUMAN	5966.55	1024	12.5427				P51452	DUSP3	Dual specificity protein phosphatase 3	DUS3_HUMAN	77.7885	1177	6.28148
P51572	BCAP31	B-cell receptor-associated protein 31	BAP31_HUMAN	25082.6	364	14.6144				P51572	BCAP31	B-cell receptor-associated protein 31	BAP31_HUMAN	770.722	408	9.59007
P51610	HCFC1	Host cell factor 1	HCFC1_HUMAN	7163.69	957	12.8065				P51610	HCFC1	Host cell factor 1	HCFC1_HUMAN	299.114	870	8.22455
P51659	HSD17B4	Peroxisomal multifunctional enzyme type 2	DHB4_HUMAN	11019.8	755	13.4278				P51659	HSD17B4	Peroxisomal multifunctional enzyme type 2	DHB4_HUMAN	561.358	564	9.13278
P51665	PSMD7	26S proteasome non-ATPase regulatory subunit 7	PSMD7_HUMAN	29988.9	321	14.8721				P51665	PSMD7	26S proteasome non-ATPase regulatory subunit 7	PSMD7_HUMAN	1394.84	224	10.4459
P51858	HDGF	Hepatoma-derived growth factor	HDGF_HUMAN	31475	304	14.9419				P51858	HDGF	Hepatoma-derived growth factor	HDGF_HUMAN	1256.77	255	10.2955
P51991	HNRNPA3	Heterogeneous nuclear ribonucleoprotein A3	ROA3_HUMAN	11831.9	719	13.5304				P51991	HNRNPA3	Heterogeneous nuclear ribonucleoprotein A3	ROA3_HUMAN	614.495	519	9.26326
P52209	PGD	6-phosphogluconate dehydrogenase, decarboxylating	6PGD_HUMAN	27141.4	347	14.7282				P52209	PGD	6-phosphogluconate dehydrogenase, decarboxylating	6PGD_HUMAN	791.506	398	9.62846
P52272	HNRNPM	Heterogeneous nuclear ribonucleoprotein M	HNRPM_HUMAN	64419.6	136	15.9752				P52272	HNRNPM	Heterogeneous nuclear ribonucleoprotein M	HNRPM_HUMAN	1865.81	159	10.8656
P52292	KPNA2	Importin subunit alpha-1	IMA1_HUMAN	27121.4	348	14.7271				P52292	KPNA2	Importin subunit alpha-1	IMA1_HUMAN	666.438	475	9.38033
P52565	ARHGDIA	Rho GDP-dissociation inhibitor 1	GDIR1_HUMAN	30910	310	14.9158				P52565	ARHGDIA	Rho GDP-dissociation inhibitor 1	GDIR1_HUMAN	930.205	347	9.86141
P52566	ARHGDIB	Rho GDP-dissociation inhibitor 2	GDIR2_HUMAN	43850.6	218	15.4203				P52566	ARHGDIB	Rho GDP-dissociation inhibitor 2	GDIR2_HUMAN	1668.32	183	10.7042
P52597	HNRNPF	Heterogeneous nuclear ribonucleoprotein F	HNRPF_HUMAN	21458.3	426	14.3892				P52597	HNRNPF	Heterogeneous nuclear ribonucleoprotein F	HNRPF_HUMAN	714.144	444	9.48007
P52788	SMS	Spermine synthase	SPSY_HUMAN	11119.7	752	13.4408				P52788	SMS	Spermine synthase	SPSY_HUMAN	275.982	900	8.10843
P52815	MRPL12	39S ribosomal protein L12, mitochondrial	RM12_HUMAN	18590.9	496	14.1823				P52815	MRPL12	39S ribosomal protein L12, mitochondrial	RM12_HUMAN	794.704	395	9.63427
P52907	CAPZA1	F-actin-capping protein subunit alpha-1	CAZA1_HUMAN	17733.4	516	14.1142				P52907	CAPZA1	F-actin-capping protein subunit alpha-1	CAZA1_HUMAN	689.979	457	9.43041
P53004	BLVRA	Biliverdin reductase A	BIEA_HUMAN	12104.8	715	13.5633				P53004	BLVRA	Biliverdin reductase A	BIEA_HUMAN	251.885	944	7.97662
P53367	ARFIP1	Arfaptin-1	ARFP1_HUMAN	12407.4	697	13.5989				P53367	ARFIP1	Arfaptin-1	ARFP1_HUMAN	278.835	896	8.12327
P53396	ACLY	ATP-citrate synthase	ACLY_HUMAN	34849.7	270	15.0889				P53396	ACLY	ATP-citrate synthase	ACLY_HUMAN	1023.19	317	9.99885
P53618	COPB1	Coatomer subunit beta	COPB_HUMAN	24058	375	14.5542				P53618	COPB1	Coatomer subunit beta	COPB_HUMAN	853.612	375	9.73744
P53621	COPA	Coatomer subunit alpha	COPA_HUMAN	11340.6	741	13.4692				P53621	COPA	Coatomer subunit alpha	COPA_HUMAN	545.29	579	9.09088
P53680	AP2S1	AP-2 complex subunit sigma	AP2S1_HUMAN	16433.4	547	14.0043				P53680	AP2S1	AP-2 complex subunit sigma	AP2S1_HUMAN	467.851	659	8.8699
P53999	SUB1	Activated RNA polymerase II transcriptional coactivator p15	TCP4_HUMAN	43676.8	220	15.4146				P53999	SUB1	Activated RNA polymerase II transcriptional coactivator p15	TCP4_HUMAN	1852.71	160	10.8554
P54136	RARS	Arginine--tRNA ligase, cytoplasmic	SYRC_HUMAN	19156.6	479	14.2256				P54136	RARS	Arginine--tRNA ligase, cytoplasmic	SYRC_HUMAN	684.647	461	9.41922
P54577	YARS	Tyrosine--tRNA ligase, cytoplasmic	SYYC_HUMAN	21917.9	414	14.4198				P54577	YARS	Tyrosine--tRNA ligase, cytoplasmic	SYYC_HUMAN	771.496	407	9.59151
P54578	USP14	Ubiquitin carboxyl-terminal hydrolase 14	UBP14_HUMAN	10336	790	13.3354				P54578	USP14	Ubiquitin carboxyl-terminal hydrolase 14	UBP14_HUMAN	930.469	346	9.86181
P54687	BCAT1	Branched-chain-amino-acid aminotransferase, cytosolic	BCAT1_HUMAN	7152.07	958	12.8041				P54687	BCAT1	Branched-chain-amino-acid aminotransferase, cytosolic	BCAT1_HUMAN	171.136	1077	7.419
P54725	RAD23A	UV excision repair protein RAD23 homolog A	RD23A_HUMAN	4547.39	1112	12.1508				P54725	RAD23A	UV excision repair protein RAD23 homolog A	RD23A_HUMAN	672.776	468	9.39398
P54727	RAD23B	UV excision repair protein RAD23 homolog B	RD23B_HUMAN	20648.3	441	14.3337				P54727	RAD23B	UV excision repair protein RAD23 homolog B	RD23B_HUMAN	991.842	327	9.95397
P54819	AK2	Adenylate kinase 2, mitochondrial	KAD2_HUMAN	9939.36	804	13.2789				P54819	AK2	Adenylate kinase 2, mitochondrial	KAD2_HUMAN	413.074	722	8.69026
P54920	NAPA	Alpha-soluble NSF attachment protein	SNAA_HUMAN	11265.6	745	13.4596				P54920	NAPA	Alpha-soluble NSF attachment protein	SNAA_HUMAN	456.871	669	8.83564
P55010	EIF5	Eukaryotic translation initiation factor 5	IF5_HUMAN	15993.5	555	13.9652				P55010	EIF5	Eukaryotic translation initiation factor 5	IF5_HUMAN	713.274	445	9.47831
P55036	PSMD4	26S proteasome non-ATPase regulatory subunit 4	PSMD4_HUMAN	19381.4	469	14.2424				P55036	PSMD4	26S proteasome non-ATPase regulatory subunit 4	PSMD4_HUMAN	369.443	767	8.52921
P55060	CSE1L	Exportin-2	XPO2_HUMAN	535512	9	19.0306				P55060	CSE1L	Exportin-2	XPO2_HUMAN	1233.73	263	10.2688
P55072	VCP	Transitional endoplasmic reticulum ATPase	TERA_HUMAN	43294.3	223	15.4019				P55072	VCP	Transitional endoplasmic reticulum ATPase	TERA_HUMAN	698.74	453	9.44861
P55084	HADHB	Trifunctional enzyme subunit beta, mitochondrial	ECHB_HUMAN	8922.4	848	13.1232				P55084	HADHB	Trifunctional enzyme subunit beta, mitochondrial	ECHB_HUMAN	218.707	994	7.77286
P55209	NAP1L1	Nucleosome assembly protein 1-like 1	NP1L1_HUMAN	31568.2	302	14.9462				P55209	NAP1L1	Nucleosome assembly protein 1-like 1	NP1L1_HUMAN	231.769	976	7.85654
P55263	ADK	Adenosine kinase	ADK_HUMAN	4851.94	1095	12.2443				P55263	ADK	Adenosine kinase	ADK_HUMAN	274.116	905	8.09864
P55327	TPD52	Tumor protein D52	TPD52_HUMAN	5983.17	1022	12.5467				P55327	TPD52	Tumor protein D52	TPD52_HUMAN	177.2	1065	7.46924
P55735	SEC13	Protein SEC13 homolog	SEC13_HUMAN	5044.25	1086	12.3004				P55735	SEC13	Protein SEC13 homolog	SEC13_HUMAN	156.175	1094	7.28702
P55769	SNU13	NHP2-like protein 1	NH2L1_HUMAN	19489.6	467	14.2504				P55769	SNU13	NHP2-like protein 1	NH2L1_HUMAN	405.022	730	8.66186
P55786	NPEPPS	Puromycin-sensitive aminopeptidase	PSA_HUMAN	7774.3	916	12.9245				P55786	NPEPPS	Puromycin-sensitive aminopeptidase	PSA_HUMAN	198.891	1033	7.63583
P55884	EIF3B	Eukaryotic translation initiation factor 3 subunit B	EIF3B_HUMAN	23615.2	380	14.5274				P55884	EIF3B	Eukaryotic translation initiation factor 3 subunit B	EIF3B_HUMAN	714.544	443	9.48088
P56182	RRP1	Ribosomal RNA processing protein 1 homolog A	RRP1_HUMAN	5087677	1	22.2786				P56182	RRP1	Ribosomal RNA processing protein 1 homolog A	RRP1_HUMAN	1.31356e+06	1	20.325
P56192	MARS	Methionine--tRNA ligase, cytoplasmic	SYMC_HUMAN	14711.6	593	13.8447				P56192	MARS	Methionine--tRNA ligase, cytoplasmic	SYMC_HUMAN	361.591	776	8.49821
P56537	EIF6	Eukaryotic translation initiation factor 6	IF6_HUMAN	67687.3	129	16.0466				P56537	EIF6	Eukaryotic translation initiation factor 6	IF6_HUMAN	1872.25	157	10.8706
P57740	NUP107	Nuclear pore complex protein Nup107	NU107_HUMAN	4808.59	1097	12.2314				P57740	NUP107	Nuclear pore complex protein Nup107	NU107_HUMAN	256.389	931	8.00219
P59998	ARPC4	Actin-related protein 2/3 complex subunit 4	ARPC4_HUMAN	35792.7	264	15.1274				P59998	ARPC4	Actin-related protein 2/3 complex subunit 4	ARPC4_HUMAN	759.441	415	9.56879
P60174	TPI1	Triosephosphate isomerase	TPIS_HUMAN	113539	70	16.7928				P60174	TPI1	Triosephosphate isomerase	TPIS_HUMAN	8725.61	27	13.091
P60228	EIF3E	Eukaryotic translation initiation factor 3 subunit E	EIF3E_HUMAN	13397.1	646	13.7096				P60228	EIF3E	Eukaryotic translation initiation factor 3 subunit E	EIF3E_HUMAN	550.067	574	9.10346
P60660	MYL6	Myosin light polypeptide 6	MYL6_HUMAN	124481	61	16.9256				P60660	MYL6	Myosin light polypeptide 6	MYL6_HUMAN	2653.44	98	11.3736
P60709	ACTB	Actin, cytoplasmic 1	ACTB_HUMAN	159201	44	17.2805				P60709	ACTB	Actin, cytoplasmic 1	ACTB_HUMAN	70924.2	2	16.114
P60842	EIF4A1	Eukaryotic initiation factor 4A-I	IF4A1_HUMAN	76540.3	110	16.2239				P60842	EIF4A1	Eukaryotic initiation factor 4A-I	IF4A1_HUMAN	4781.27	51	12.2232
P60866	RPS20	40S ribosomal protein S20	RS20_HUMAN	111912	72	16.772				P60866	RPS20	40S ribosomal protein S20	RS20_HUMAN	3293.75	78	11.6855
P60891	PRPS1	Ribose-phosphate pyrophosphokinase 1	PRPS1_HUMAN	6314.55	999	12.6245				P60891	PRPS1	Ribose-phosphate pyrophosphokinase 1	PRPS1_HUMAN	482.826	636	8.91536
P60900	PSMA6	Proteasome subunit alpha type-6	PSA6_HUMAN	23311.1	386	14.5087				P60900	PSMA6	Proteasome subunit alpha type-6	PSA6_HUMAN	1035.25	310	10.0158
P60903	S100A10	Protein S100-A10	S10AA_HUMAN	200917	37	17.6162				P60903	S100A10	Protein S100-A10	S10AA_HUMAN	5686.36	43	12.4733
P60953	CDC42	Cell division control protein 42 homolog	CDC42_HUMAN	28580.8	333	14.8028				P60953	CDC42	Cell division control protein 42 homolog	CDC42_HUMAN	928.211	348	9.85831
P60981	DSTN	Destrin	DEST_HUMAN	59811.1	152	15.8681				P60981	DSTN	Destrin	DEST_HUMAN	1871.72	158	10.8701
P60983	GMFB	Glia maturation factor beta	GMFB_HUMAN	14917.3	587	13.8647				P60983	GMFB	Glia maturation factor beta	GMFB_HUMAN	654.137	484	9.35345
P61011	SRP54	Signal recognition particle 54 kDa protein	SRP54_HUMAN	4721.13	1102	12.2049				P61011	SRP54	Signal recognition particle 54 kDa protein	SRP54_HUMAN	176.661	1067	7.46484
P61019	RAB2A	Ras-related protein Rab-2A	RAB2A_HUMAN	8203.08	892	13.002				P61019	RAB2A	Ras-related protein Rab-2A	RAB2A_HUMAN	377.565	760	8.56058
P61081	UBE2M	NEDD8-conjugating enzyme Ubc12	UBC12_HUMAN	24022.9	377	14.5521				P61081	UBE2M	NEDD8-conjugating enzyme Ubc12	UBC12_HUMAN	775.438	405	9.59887
P61086	UBE2K	Ubiquitin-conjugating enzyme E2 K	UBE2K_HUMAN	19119.2	481	14.2227				P61086	UBE2K	Ubiquitin-conjugating enzyme E2 K	UBE2K_HUMAN	627.572	506	9.29364
P61088	UBE2N	Ubiquitin-conjugating enzyme E2 N	UBE2N_HUMAN	67106.8	131	16.0342				P61088	UBE2N	Ubiquitin-conjugating enzyme E2 N	UBE2N_HUMAN	1723.85	180	10.7514
P61158	ACTR3	Actin-related protein 3	ARP3_HUMAN	25805.4	361	14.6554				P61158	ACTR3	Actin-related protein 3	ARP3_HUMAN	568.154	557	9.15014
P61160	ACTR2	Actin-related protein 2	ARP2_HUMAN	20178.9	453	14.3006				P61160	ACTR2	Actin-related protein 2	ARP2_HUMAN	566.576	559	9.14613
P61201	COPS2	COP9 signalosome complex subunit 2	CSN2_HUMAN	2714.74	1170	11.4066				P61201	COPS2	COP9 signalosome complex subunit 2	CSN2_HUMAN	140.956	1118	7.13911
P61204;P84077	ARF3;ARF1	ADP-ribosylation factor 3;ADP-ribosylation factor 1	ARF3_HUMAN;ARF1_HUMAN	8535.84	865	13.0593				P61204;P84077	ARF3;ARF1	ADP-ribosylation factor 3;ADP-ribosylation factor 1	ARF3_HUMAN;ARF1_HUMAN	147.61	1104	7.20565
P61224	RAP1B	Ras-related protein Rap-1b	RAP1B_HUMAN	24961.6	367	14.6074				P61224	RAP1B	Ras-related protein Rap-1b	RAP1B_HUMAN	874.004	368	9.7715
P61247	RPS3A	40S ribosomal protein S3a	RS3A_HUMAN	93659.5	83	16.5151				P61247	RPS3A	40S ribosomal protein S3a	RS3A_HUMAN	3190.85	81	11.6397
P61254;Q9UNX3	RPL26;RPL26L1	60S ribosomal protein L26;60S ribosomal protein L26-like 1	RL26_HUMAN;RL26L_HUMAN	79405.1	106	16.2769				P61254;Q9UNX3	RPL26;RPL26L1	60S ribosomal protein L26;60S ribosomal protein L26-like 1	RL26_HUMAN;RL26L_HUMAN	2104.21	140	11.0391
P61289	PSME3	Proteasome activator complex subunit 3	PSME3_HUMAN	8611.62	861	13.0721				P61289	PSME3	Proteasome activator complex subunit 3	PSME3_HUMAN	296.377	873	8.21129
P61313	RPL15	60S ribosomal protein L15	RL15_HUMAN	67934.3	126	16.0519				P61313	RPL15	60S ribosomal protein L15	RL15_HUMAN	2607.65	102	11.3485
P61353	RPL27	60S ribosomal protein L27	RL27_HUMAN	100915	77	16.6228				P61353	RPL27	60S ribosomal protein L27	RL27_HUMAN	2528.38	109	11.304
P61457	PCBD1	Pterin-4-alpha-carbinolamine dehydratase	PHS_HUMAN	3869.94	1137	11.9181				P61457	PCBD1	Pterin-4-alpha-carbinolamine dehydratase	PHS_HUMAN	1964.62	150	10.94
P61513	RPL37A	60S ribosomal protein L37a	RL37A_HUMAN	32250.4	293	14.977				P61513	RPL37A	60S ribosomal protein L37a	RL37A_HUMAN	886.533	357	9.79203
P61586	RHOA	Transforming protein RhoA	RHOA_HUMAN	44337.6	212	15.4362				P61586	RHOA	Transforming protein RhoA	RHOA_HUMAN	1836.88	162	10.843
P61604	HSPE1	10 kDa heat shock protein, mitochondrial	CH10_HUMAN	125364	60	16.9358				P61604	HSPE1	10 kDa heat shock protein, mitochondrial	CH10_HUMAN	4864.52	50	12.2481
P61758	VBP1	Prefoldin subunit 3	PFD3_HUMAN	7595.89	929	12.891				P61758	VBP1	Prefoldin subunit 3	PFD3_HUMAN	149.461	1102	7.22363
P61769	B2M	Beta-2-microglobulin	B2MG_HUMAN	10614.3	775	13.3737				P61769	B2M	Beta-2-microglobulin	B2MG_HUMAN	269.159	913	8.07231
P61916	NPC2	NPC intracellular cholesterol transporter 2	NPC2_HUMAN	19058.3	484	14.2181				P61916	NPC2	NPC intracellular cholesterol transporter 2	NPC2_HUMAN	355.854	783	8.47514
P61923	COPZ1	Coatomer subunit zeta-1	COPZ1_HUMAN	13268	654	13.6957				P61923	COPZ1	Coatomer subunit zeta-1	COPZ1_HUMAN	214.706	1002	7.74622
P61960	UFM1	Ubiquitin-fold modifier 1	UFM1_HUMAN	6227.25	1004	12.6044				P61960	UFM1	Ubiquitin-fold modifier 1	UFM1_HUMAN	208.381	1012	7.70308
P61970	NUTF2	Nuclear transport factor 2	NTF2_HUMAN	32945.4	283	15.0078				P61970	NUTF2	Nuclear transport factor 2	NTF2_HUMAN	755.855	417	9.56197
P61978	HNRNPK	Heterogeneous nuclear ribonucleoprotein K	HNRPK_HUMAN	66698.7	132	16.0254				P61978	HNRNPK	Heterogeneous nuclear ribonucleoprotein K	HNRPK_HUMAN	1935.41	153	10.9184
P61981	YWHAG	14-3-3 protein gamma	1433G_HUMAN	55271.2	163	15.7542				P61981	YWHAG	14-3-3 protein gamma	1433G_HUMAN	1806.93	168	10.8193
P62081	RPS7	40S ribosomal protein S7	RS7_HUMAN	81315.5	102	16.3112				P62081	RPS7	40S ribosomal protein S7	RS7_HUMAN	1801.34	170	10.8149
P62136	PPP1CA	Serine/threonine-protein phosphatase PP1-alpha catalytic subunit	PP1A_HUMAN	22904.3	393	14.4833				P62136	PPP1CA	Serine/threonine-protein phosphatase PP1-alpha catalytic subunit	PP1A_HUMAN	531.706	593	9.05448
P62140	PPP1CB	Serine/threonine-protein phosphatase PP1-beta catalytic subunit	PP1B_HUMAN	13287.4	652	13.6978				P62140	PPP1CB	Serine/threonine-protein phosphatase PP1-beta catalytic subunit	PP1B_HUMAN	369.213	768	8.52831
P62191	PSMC1	26S proteasome regulatory subunit 4	PRS4_HUMAN	21803	420	14.4122				P62191	PSMC1	26S proteasome regulatory subunit 4	PRS4_HUMAN	930.973	345	9.86259
P62195	PSMC5	26S proteasome regulatory subunit 8	PRS8_HUMAN	14312.2	615	13.805				P62195	PSMC5	26S proteasome regulatory subunit 8	PRS8_HUMAN	557.901	567	9.12387
P62241	RPS8	40S ribosomal protein S8	RS8_HUMAN	72003.3	119	16.1358				P62241	RPS8	40S ribosomal protein S8	RS8_HUMAN	1525.97	202	10.5755
P62244	RPS15A	40S ribosomal protein S15a	RS15A_HUMAN	67438.9	130	16.0413				P62244	RPS15A	40S ribosomal protein S15a	RS15A_HUMAN	1974.54	149	10.9473
P62249	RPS16	40S ribosomal protein S16	RS16_HUMAN	89106.1	89	16.4432				P62249	RPS16	40S ribosomal protein S16	RS16_HUMAN	2092.7	141	11.0311
P62258	YWHAE	14-3-3 protein epsilon	1433E_HUMAN	98669.5	78	16.5903				P62258	YWHAE	14-3-3 protein epsilon	1433E_HUMAN	4318.52	56	12.0763
P62263	RPS14	40S ribosomal protein S14	RS14_HUMAN	152145	50	17.2151				P62263	RPS14	40S ribosomal protein S14	RS14_HUMAN	3246.24	79	11.6646
P62266	RPS23	40S ribosomal protein S23	RS23_HUMAN	22383.7	402	14.4502				P62266	RPS23	40S ribosomal protein S23	RS23_HUMAN	356.86	781	8.47921
P62269	RPS18	40S ribosomal protein S18	RS18_HUMAN	85313	98	16.3805				P62269	RPS18	40S ribosomal protein S18	RS18_HUMAN	3793.69	67	11.8894
P62273	RPS29	40S ribosomal protein S29	RS29_HUMAN	23586.3	381	14.5257				P62273	RPS29	40S ribosomal protein S29	RS29_HUMAN	718.922	439	9.48969
P62277	RPS13	40S ribosomal protein S13	RS13_HUMAN	50433.9	183	15.6221				P62277	RPS13	40S ribosomal protein S13	RS13_HUMAN	1426.73	220	10.4785
P62280	RPS11	40S ribosomal protein S11	RS11_HUMAN	44942	208	15.4558				P62280	RPS11	40S ribosomal protein S11	RS11_HUMAN	1649.63	187	10.6879
P62306	SNRPF	Small nuclear ribonucleoprotein F	RUXF_HUMAN	21586.7	422	14.3979				P62306	SNRPF	Small nuclear ribonucleoprotein F	RUXF_HUMAN	559.922	566	9.12908
P62310	LSM3	U6 snRNA-associated Sm-like protein LSm3	LSM3_HUMAN	5725.23	1045	12.4831				P62310	LSM3	U6 snRNA-associated Sm-like protein LSm3	LSM3_HUMAN	198.899	1032	7.63589
P62312	LSM6	U6 snRNA-associated Sm-like protein LSm6	LSM6_HUMAN	7712.79	921	12.913				P62312	LSM6	U6 snRNA-associated Sm-like protein LSm6	LSM6_HUMAN	418.284	714	8.70834
P62316	SNRPD2	Small nuclear ribonucleoprotein Sm D2	SMD2_HUMAN	32933.8	284	15.0073				P62316	SNRPD2	Small nuclear ribonucleoprotein Sm D2	SMD2_HUMAN	1460.47	213	10.5122
P62318	SNRPD3	Small nuclear ribonucleoprotein Sm D3	SMD3_HUMAN	39379.5	241	15.2652				P62318	SNRPD3	Small nuclear ribonucleoprotein Sm D3	SMD3_HUMAN	1585.22	197	10.6305
P62328	TMSB4X	Thymosin beta-4	TYB4_HUMAN	472348	12	18.8495				P62328	TMSB4X	Thymosin beta-4	TYB4_HUMAN	8762.96	26	13.0972
P62333	PSMC6	26S proteasome regulatory subunit 10B	PRS10_HUMAN	18122.9	509	14.1455				P62333	PSMC6	26S proteasome regulatory subunit 10B	PRS10_HUMAN	523.553	600	9.03219
P62424	RPL7A	60S ribosomal protein L7a	RL7A_HUMAN	54870	165	15.7437				P62424	RPL7A	60S ribosomal protein L7a	RL7A_HUMAN	2108.57	139	11.0421
P62495	ETF1	Eukaryotic peptide chain release factor subunit 1	ERF1_HUMAN	18837.8	487	14.2013				P62495	ETF1	Eukaryotic peptide chain release factor subunit 1	ERF1_HUMAN	613.074	520	9.25992
P62701	RPS4X	40S ribosomal protein S4, X isoform	RS4X_HUMAN	61386.4	144	15.9056				P62701	RPS4X	40S ribosomal protein S4, X isoform	RS4X_HUMAN	1934.84	154	10.918
P62750	RPL23A	60S ribosomal protein L23a	RL23A_HUMAN	43409.4	222	15.4057				P62750	RPL23A	60S ribosomal protein L23a	RL23A_HUMAN	1272.93	251	10.3139
P62753	RPS6	40S ribosomal protein S6	RS6_HUMAN	45860	205	15.4849				P62753	RPS6	40S ribosomal protein S6	RS6_HUMAN	1379.25	229	10.4297
P62805	HIST1H4A	Histone H4	H4_HUMAN	413756	15	18.6584				P62805	HIST1H4A	Histone H4	H4_HUMAN	7203.39	33	12.8145
P62826	RAN	GTP-binding nuclear protein Ran	RAN_HUMAN	280172	23	18.096				P62826	RAN	GTP-binding nuclear protein Ran	RAN_HUMAN	9837.11	23	13.264
P62829	RPL23	60S ribosomal protein L23	RL23_HUMAN	41273.6	236	15.3329				P62829	RPL23	60S ribosomal protein L23	RL23_HUMAN	890.13	356	9.79787
P62841	RPS15	40S ribosomal protein S15	RS15_HUMAN	18071.7	513	14.1414				P62841	RPS15	40S ribosomal protein S15	RS15_HUMAN	509.902	615	8.99408
P62847	RPS24	40S ribosomal protein S24	RS24_HUMAN	15172.3	577	13.8892				P62847	RPS24	40S ribosomal protein S24	RS24_HUMAN	720.285	438	9.49242
P62851	RPS25	40S ribosomal protein S25	RS25_HUMAN	158003	46	17.2696				P62851	RPS25	40S ribosomal protein S25	RS25_HUMAN	3579.44	71	11.8055
P62857	RPS28	40S ribosomal protein S28	RS28_HUMAN	22701.1	396	14.4705				P62857	RPS28	40S ribosomal protein S28	RS28_HUMAN	894.333	354	9.80467
P62861	FAU	40S ribosomal protein S30	RS30_HUMAN	104314	75	16.6706				P62861	FAU	40S ribosomal protein S30	RS30_HUMAN	2131	137	11.0573
P62873	GNB1	Guanine nucleotide-binding protein G(I)/G(S)/G(T) subunit beta-1	GBB1_HUMAN	19380	470	14.2423				P62873	GNB1	Guanine nucleotide-binding protein G(I)/G(S)/G(T) subunit beta-1	GBB1_HUMAN	1495.61	206	10.5465
P62875	POLR2L	DNA-directed RNA polymerases I, II, and III subunit RPABC5	RPAB5_HUMAN	5400.83	1065	12.399				P62875	POLR2L	DNA-directed RNA polymerases I, II, and III subunit RPABC5	RPAB5_HUMAN	123.994	1140	6.95413
P62879	GNB2	Guanine nucleotide-binding protein G(I)/G(S)/G(T) subunit beta-2	GBB2_HUMAN	48922.1	191	15.5782				P62879	GNB2	Guanine nucleotide-binding protein G(I)/G(S)/G(T) subunit beta-2	GBB2_HUMAN	1244.26	259	10.2811
P62888	RPL30	60S ribosomal protein L30	RL30_HUMAN	11159.6	750	13.446				P62888	RPL30	60S ribosomal protein L30	RL30_HUMAN	361.021	777	8.49594
P62899	RPL31	60S ribosomal protein L31	RL31_HUMAN	122366	64	16.9008				P62899	RPL31	60S ribosomal protein L31	RL31_HUMAN	2074.1	144	11.0183
P62906	RPL10A	60S ribosomal protein L10a	RL10A_HUMAN	47718.8	195	15.5423				P62906	RPL10A	60S ribosomal protein L10a	RL10A_HUMAN	1706.4	181	10.7367
P62910	RPL32	60S ribosomal protein L32	RL32_HUMAN	10881.2	764	13.4096				P62910	RPL32	60S ribosomal protein L32	RL32_HUMAN	507.542	621	8.98738
P62913	RPL11	60S ribosomal protein L11	RL11_HUMAN	76274.3	111	16.2189				P62913	RPL11	60S ribosomal protein L11	RL11_HUMAN	1078.8	299	10.0752
P62917	RPL8	60S ribosomal protein L8	RL8_HUMAN	65879.7	133	16.0075				P62917	RPL8	60S ribosomal protein L8	RL8_HUMAN	2168.42	135	11.0824
P62937	PPIA	Peptidyl-prolyl cis-trans isomerase A	PPIA_HUMAN	87396	91	16.4153				P62937	PPIA	Peptidyl-prolyl cis-trans isomerase A	PPIA_HUMAN	5628.04	45	12.4584
P62942	FKBP1A	Peptidyl-prolyl cis-trans isomerase FKBP1A	FKB1A_HUMAN	111011	73	16.7603				P62942	FKBP1A	Peptidyl-prolyl cis-trans isomerase FKBP1A	FKB1A_HUMAN	7200.42	34	12.8139
P62979	RPS27A	Ubiquitin-40S ribosomal protein S27a	RS27A_HUMAN	126300	58	16.9465				P62979	RPS27A	Ubiquitin-40S ribosomal protein S27a	RS27A_HUMAN	4445.74	55	12.1182
P62993	GRB2	Growth factor receptor-bound protein 2	GRB2_HUMAN	11797.4	720	13.5262				P62993	GRB2	Growth factor receptor-bound protein 2	GRB2_HUMAN	386.657	749	8.59491
P63000	RAC1	Ras-related C3 botulinum toxin substrate 1	RAC1_HUMAN	61987.7	140	15.9197				P63000	RAC1	Ras-related C3 botulinum toxin substrate 1	RAC1_HUMAN	2403.4	116	11.2309
P63010	AP2B1	AP-2 complex subunit beta	AP2B1_HUMAN	18672.8	492	14.1886				P63010	AP2B1	AP-2 complex subunit beta	AP2B1_HUMAN	864.168	370	9.75517
P63104	YWHAZ	14-3-3 protein zeta/delta	1433Z_HUMAN	204327	35	17.6405				P63104	YWHAZ	14-3-3 protein zeta/delta	1433Z_HUMAN	7953.35	30	12.9573
P63151	PPP2R2A	Serine/threonine-protein phosphatase 2A 55 kDa regulatory subunit B alpha isoform	2ABA_HUMAN	9153.04	838	13.16				P63151	PPP2R2A	Serine/threonine-protein phosphatase 2A 55 kDa regulatory subunit B alpha isoform	2ABA_HUMAN	147.497	1105	7.20455
P63173	RPL38	60S ribosomal protein L38	RL38_HUMAN	70994.5	121	16.1154				P63173	RPL38	60S ribosomal protein L38	RL38_HUMAN	2996.58	88	11.5491
P63208	SKP1	S-phase kinase-associated protein 1	SKP1_HUMAN	23292.2	387	14.5076				P63208	SKP1	S-phase kinase-associated protein 1	SKP1_HUMAN	604.934	530	9.24063
P63220	RPS21	40S ribosomal protein S21	RS21_HUMAN	61223	147	15.9018				P63220	RPS21	40S ribosomal protein S21	RS21_HUMAN	1790.46	173	10.8061
P63241	EIF5A	Eukaryotic translation initiation factor 5A-1	IF5A1_HUMAN	28959	329	14.8217				P63241	EIF5A	Eukaryotic translation initiation factor 5A-1	IF5A1_HUMAN	3348.01	75	11.7091
P63244	RACK1	Receptor of activated protein C kinase 1	RACK1_HUMAN	80443.6	104	16.2957				P63244	RACK1	Receptor of activated protein C kinase 1	RACK1_HUMAN	1811.75	167	10.8232
P63279	UBE2I	SUMO-conjugating enzyme UBC9	UBC9_HUMAN	10629.6	773	13.3758				P63279	UBE2I	SUMO-conjugating enzyme UBC9	UBC9_HUMAN	181.826	1060	7.50642
P63313	TMSB10	Thymosin beta-10	TYB10_HUMAN	49530.7	188	15.596				P63313	TMSB10	Thymosin beta-10	TYB10_HUMAN	1174.82	273	10.1982
P67809	YBX1	Nuclease-sensitive element-binding protein 1	YBOX1_HUMAN	22986.6	392	14.4885				P67809	YBX1	Nuclease-sensitive element-binding protein 1	YBOX1_HUMAN	1149.56	281	10.1669
P67936	TPM4	Tropomyosin alpha-4 chain	TPM4_HUMAN	31087.3	308	14.924				P67936	TPM4	Tropomyosin alpha-4 chain	TPM4_HUMAN	1286.92	246	10.3297
P68036	UBE2L3	Ubiquitin-conjugating enzyme E2 L3	UB2L3_HUMAN	4114.5	1130	12.0065				P68036	UBE2L3	Ubiquitin-conjugating enzyme E2 L3	UB2L3_HUMAN	177.795	1063	7.47407
P68363	TUBA1B	Tubulin alpha-1B chain	TBA1B_HUMAN	282129	22	18.106				P68363	TUBA1B	Tubulin alpha-1B chain	TBA1B_HUMAN	11982.8	20	13.5487
P68366	TUBA4A	Tubulin alpha-4A chain	TBA4A_HUMAN	14580	599	13.8317				P68366	TUBA4A	Tubulin alpha-4A chain	TBA4A_HUMAN	605.42	527	9.24179
P68371	TUBB4B	Tubulin beta-4B chain	TBB4B_HUMAN	573598	8	19.1297				P68371	TUBB4B	Tubulin beta-4B chain	TBB4B_HUMAN	20619.7	10	14.3317
P68431;P84243;Q16695;Q6NXT2;Q71DI3	HIST1H3A;H3F3A;HIST3H3;H3F3C;HIST2H3A	Histone H3.1;Histone H3.3;Histone H3.1t;Histone H3.3C;Histone H3.2	H31_HUMAN;H33_HUMAN;H31T_HUMAN;H3C_HUMAN;H32_HUMAN	206678	34	17.657				P68431;P84243;Q16695;Q6NXT2;Q71DI3	HIST1H3A;H3F3A;HIST3H3;H3F3C;HIST2H3A	Histone H3.1;Histone H3.3;Histone H3.1t;Histone H3.3C;Histone H3.2	H31_HUMAN;H33_HUMAN;H31T_HUMAN;H3C_HUMAN;H32_HUMAN	9678.63	25	13.2406
P78330	PSPH	Phosphoserine phosphatase	SERB_HUMAN	11436.7	740	13.4814				P78330	PSPH	Phosphoserine phosphatase	SERB_HUMAN	397.105	738	8.63338
P78344	EIF4G2	Eukaryotic translation initiation factor 4 gamma 2	IF4G2_HUMAN	12805.1	676	13.6444				P78344	EIF4G2	Eukaryotic translation initiation factor 4 gamma 2	IF4G2_HUMAN	307.007	854	8.26213
P78347	GTF2I	General transcription factor II-I	GTF2I_HUMAN	6963.65	968	12.7656				P78347	GTF2I	General transcription factor II-I	GTF2I_HUMAN	225.545	986	7.81727
P78371	CCT2	T-complex protein 1 subunit beta	TCPB_HUMAN	51321.8	179	15.6473				P78371	CCT2	T-complex protein 1 subunit beta	TCPB_HUMAN	1529.4	201	10.5788
P78417	GSTO1	Glutathione S-transferase omega-1	GSTO1_HUMAN	88410.9	90	16.4319				P78417	GSTO1	Glutathione S-transferase omega-1	GSTO1_HUMAN	2616.3	101	11.3533
P78527	PRKDC	DNA-dependent protein kinase catalytic subunit	PRKDC_HUMAN	67813.2	127	16.0493				P78527	PRKDC	DNA-dependent protein kinase catalytic subunit	PRKDC_HUMAN	506.633	625	8.9848
P80723	BASP1	Brain acid soluble protein 1	BASP1_HUMAN	13773.2	635	13.7496				P80723	BASP1	Brain acid soluble protein 1	BASP1_HUMAN	474.512	648	8.8903
P82979	SARNP	SAP domain-containing ribonucleoprotein	SARNP_HUMAN	22548.8	398	14.4608				P82979	SARNP	SAP domain-containing ribonucleoprotein	SARNP_HUMAN	916.342	351	9.83974
P83731	RPL24	60S ribosomal protein L24	RL24_HUMAN	19309.6	474	14.237				P83731	RPL24	60S ribosomal protein L24	RL24_HUMAN	539.629	583	9.07582
P83881;Q969Q0	RPL36A;RPL36AL	60S ribosomal protein L36a;60S ribosomal protein L36a-like	RL36A_HUMAN;RL36L_HUMAN	85354.6	97	16.3812				P83881;Q969Q0	RPL36A;RPL36AL	60S ribosomal protein L36a;60S ribosomal protein L36a-like	RL36A_HUMAN;RL36L_HUMAN	2246.78	124	11.1336
P83916	CBX1	Chromobox protein homolog 1	CBX1_HUMAN	16509.8	546	14.011				P83916	CBX1	Chromobox protein homolog 1	CBX1_HUMAN	715.698	442	9.48321
P84085	ARF5	ADP-ribosylation factor 5	ARF5_HUMAN	30554.4	315	14.8991				P84085	ARF5	ADP-ribosylation factor 5	ARF5_HUMAN	1026.81	315	10.004
P84090	ERH	Enhancer of rudimentary homolog	ERH_HUMAN	36189.2	260	15.1433				P84090	ERH	Enhancer of rudimentary homolog	ERH_HUMAN	1359.61	231	10.409
P84095	RHOG	Rho-related GTP-binding protein RhoG	RHOG_HUMAN	9130.54	840	13.1565				P84095	RHOG	Rho-related GTP-binding protein RhoG	RHOG_HUMAN	394.44	742	8.62366
P84098	RPL19	60S ribosomal protein L19	RL19_HUMAN	44074.9	214	15.4277				P84098	RPL19	60S ribosomal protein L19	RL19_HUMAN	2467.31	113	11.2687
P84103	SRSF3	Serine/arginine-rich splicing factor 3	SRSF3_HUMAN	43742.2	219	15.4167				P84103	SRSF3	Serine/arginine-rich splicing factor 3	SRSF3_HUMAN	1442.92	218	10.4948
P98175	RBM10	RNA-binding protein 10	RBM10_HUMAN	4993.13	1090	12.2857				P98175	RBM10	RNA-binding protein 10	RBM10_HUMAN	119.065	1148	6.89561
P98179	RBM3	RNA-binding protein 3	RBM3_HUMAN	5558.76	1054	12.4405				P98179	RBM3	RNA-binding protein 3	RBM3_HUMAN	58.264	1183	5.86453
P99999	CYCS	Cytochrome c	CYC_HUMAN	4374.71	1120	12.095				P99999	CYCS	Cytochrome c	CYC_HUMAN	348.731	793	8.44597
Q00325	SLC25A3	Phosphate carrier protein, mitochondrial	MPCP_HUMAN	33664.7	278	15.0389				Q00325	SLC25A3	Phosphate carrier protein, mitochondrial	MPCP_HUMAN	1790.87	172	10.8064
Q00341	HDLBP	Vigilin	VIGLN_HUMAN	9649.16	809	13.2362				Q00341	HDLBP	Vigilin	VIGLN_HUMAN	365.756	771	8.51474
Q00534	CDK6	Cyclin-dependent kinase 6	CDK6_HUMAN	6160.53	1007	12.5888				Q00534	CDK6	Cyclin-dependent kinase 6	CDK6_HUMAN	357.919	780	8.48349
Q00610	CLTC	Clathrin heavy chain 1	CLH1_HUMAN	69515.3	124	16.085				Q00610	CLTC	Clathrin heavy chain 1	CLH1_HUMAN	803.892	391	9.65086
Q00688	FKBP3	Peptidyl-prolyl cis-trans isomerase FKBP3	FKBP3_HUMAN	12813.8	675	13.6454				Q00688	FKBP3	Peptidyl-prolyl cis-trans isomerase FKBP3	FKBP3_HUMAN	538.303	586	9.07228
Q00765	REEP5	Receptor expression-enhancing protein 5	REEP5_HUMAN	23935.4	378	14.5469				Q00765	REEP5	Receptor expression-enhancing protein 5	REEP5_HUMAN	1121.8	288	10.1316
Q00839	HNRNPU	Heterogeneous nuclear ribonucleoprotein U	HNRPU_HUMAN	121896	65	16.8953				Q00839	HNRNPU	Heterogeneous nuclear ribonucleoprotein U	HNRPU_HUMAN	3867.11	66	11.917
Q01082	SPTBN1	Spectrin beta chain, non-erythrocytic 1	SPTB2_HUMAN	34813.3	271	15.0874				Q01082	SPTBN1	Spectrin beta chain, non-erythrocytic 1	SPTB2_HUMAN	791.458	399	9.62837
Q01085	TIAL1	Nucleolysin TIAR	TIAR_HUMAN	7706.75	923	12.9119				Q01085	TIAL1	Nucleolysin TIAR	TIAR_HUMAN	324.3	830	8.34119
Q01105	SET	Protein SET	SET_HUMAN	31730.9	301	14.9536				Q01105	SET	Protein SET	SET_HUMAN	2050.4	146	11.0017
Q01469	FABP5	Fatty acid-binding protein 5	FABP5_HUMAN	35219.9	266	15.1041				Q01469	FABP5	Fatty acid-binding protein 5	FABP5_HUMAN	1297.64	244	10.3417
Q01518	CAP1	Adenylyl cyclase-associated protein 1	CAP1_HUMAN	61467.7	142	15.9075				Q01518	CAP1	Adenylyl cyclase-associated protein 1	CAP1_HUMAN	2567.59	105	11.3262
Q01650	SLC7A5	Large neutral amino acids transporter small subunit 1	LAT1_HUMAN	6148.94	1009	12.5861				Q01650	SLC7A5	Large neutral amino acids transporter small subunit 1	LAT1_HUMAN	280.051	895	8.12955
Q01813	PFKP	ATP-dependent 6-phosphofructokinase, platelet type	PFKAP_HUMAN	31068.5	309	14.9232				Q01813	PFKP	ATP-dependent 6-phosphofructokinase, platelet type	PFKAP_HUMAN	1495.16	207	10.5461
Q01844	EWSR1	RNA-binding protein EWS	EWS_HUMAN	27276.3	344	14.7354				Q01844	EWSR1	RNA-binding protein EWS	EWS_HUMAN	649.78	489	9.34381
Q02218	OGDH	2-oxoglutarate dehydrogenase, mitochondrial	ODO1_HUMAN	33537.9	279	15.0335				Q02218	OGDH	2-oxoglutarate dehydrogenase, mitochondrial	ODO1_HUMAN	191.851	1043	7.58384
Q02543	RPL18A	60S ribosomal protein L18a	RL18A_HUMAN	12669.2	684	13.629				Q02543	RPL18A	60S ribosomal protein L18a	RL18A_HUMAN	915.295	352	9.83809
Q02750	MAP2K1	Dual specificity mitogen-activated protein kinase kinase 1	MP2K1_HUMAN	14898.5	590	13.8629				Q02750	MAP2K1	Dual specificity mitogen-activated protein kinase kinase 1	MP2K1_HUMAN	654.816	483	9.35495
Q02790	FKBP4	Peptidyl-prolyl cis-trans isomerase FKBP4	FKBP4_HUMAN	32914.4	285	15.0064				Q02790	FKBP4	Peptidyl-prolyl cis-trans isomerase FKBP4	FKBP4_HUMAN	1162.09	276	10.1825
Q02878	RPL6	60S ribosomal protein L6	RL6_HUMAN	47614.1	196	15.5391				Q02878	RPL6	60S ribosomal protein L6	RL6_HUMAN	2451.69	114	11.2596
Q02978	SLC25A11	Mitochondrial 2-oxoglutarate/malate carrier protein	M2OM_HUMAN	1884.73	1180	10.8801				Q02978	SLC25A11	Mitochondrial 2-oxoglutarate/malate carrier protein	M2OM_HUMAN	233.826	970	7.86929
Q03135	CAV1	Caveolin-1	CAV1_HUMAN	19700.4	459	14.2659				Q03135	CAV1	Caveolin-1	CAV1_HUMAN	403.941	732	8.658
Q03252	LMNB2	Lamin-B2	LMNB2_HUMAN	21645.2	421	14.4018				Q03252	LMNB2	Lamin-B2	LMNB2_HUMAN	607.957	523	9.24782
Q04206	RELA	Transcription factor p65	TF65_HUMAN	3638.18	1143	11.829				Q04206	RELA	Transcription factor p65	TF65_HUMAN	123.968	1141	6.95382
Q04446	GBE1	1,4-alpha-glucan-branching enzyme	GLGB_HUMAN	7880.61	909	12.9441				Q04446	GBE1	1,4-alpha-glucan-branching enzyme	GLGB_HUMAN	250.217	947	7.96704
Q04637	EIF4G1	Eukaryotic translation initiation factor 4 gamma 1	IF4G1_HUMAN	29137.2	327	14.8306				Q04637	EIF4G1	Eukaryotic translation initiation factor 4 gamma 1	IF4G1_HUMAN	1222.2	266	10.2553
Q04760	GLO1	Lactoylglutathione lyase	LGUL_HUMAN	49476.6	189	15.5945				Q04760	GLO1	Lactoylglutathione lyase	LGUL_HUMAN	950.376	338	9.89235
Q04837	SSBP1	Single-stranded DNA-binding protein, mitochondrial	SSBP_HUMAN	18429	499	14.1697				Q04837	SSBP1	Single-stranded DNA-binding protein, mitochondrial	SSBP_HUMAN	667.094	472	9.38175
Q04917	YWHAH	14-3-3 protein eta	1433F_HUMAN	24764.7	369	14.596				Q04917	YWHAH	14-3-3 protein eta	1433F_HUMAN	763.789	412	9.57703
Q05639	EEF1A2	Elongation factor 1-alpha 2	EF1A2_HUMAN	234152	28	17.8371				Q05639	EEF1A2	Elongation factor 1-alpha 2	EF1A2_HUMAN	46365.6	3	15.5008
Q05682	CALD1	Caldesmon	CALD1_HUMAN	8385.81	878	13.0337				Q05682	CALD1	Caldesmon	CALD1_HUMAN	253.523	936	7.98597
Q06210	GFPT1	Glutamine--fructose-6-phosphate aminotransferase [isomerizing] 1	GFPT1_HUMAN	7257.09	950	12.8252				Q06210	GFPT1	Glutamine--fructose-6-phosphate aminotransferase [isomerizing] 1	GFPT1_HUMAN	227.055	983	7.8269
Q06323	PSME1	Proteasome activator complex subunit 1	PSME1_HUMAN	33507.1	280	15.0322				Q06323	PSME1	Proteasome activator complex subunit 1	PSME1_HUMAN	734.39	426	9.5204
Q06481	APLP2	Amyloid-like protein 2	APLP2_HUMAN	8379.06	879	13.0326				Q06481	APLP2	Amyloid-like protein 2	APLP2_HUMAN	219.282	991	7.77665
Q06830	PRDX1	Peroxiredoxin-1	PRDX1_HUMAN	200332	39	17.612				Q06830	PRDX1	Peroxiredoxin-1	PRDX1_HUMAN	5866.21	38	12.5182
Q07020	RPL18	60S ribosomal protein L18	RL18_HUMAN	43900.5	217	15.4219				Q07020	RPL18	60S ribosomal protein L18	RL18_HUMAN	1320.45	241	10.3668
Q07065	CKAP4	Cytoskeleton-associated protein 4	CKAP4_HUMAN	13397.1	647	13.7096				Q07065	CKAP4	Cytoskeleton-associated protein 4	CKAP4_HUMAN	701.784	451	9.45488
Q07666	KHDRBS1	KH domain-containing, RNA-binding, signal transduction-associated protein 1	KHDR1_HUMAN	38740.3	244	15.2415				Q07666	KHDRBS1	KH domain-containing, RNA-binding, signal transduction-associated protein 1	KHDR1_HUMAN	1271.16	252	10.3119
Q07866	KLC1	Kinesin light chain 1	KLC1_HUMAN	5859.81	1033	12.5166				Q07866	KLC1	Kinesin light chain 1	KLC1_HUMAN	281.166	892	8.13528
Q07955	SRSF1	Serine/arginine-rich splicing factor 1	SRSF1_HUMAN	17386.3	526	14.0857				Q07955	SRSF1	Serine/arginine-rich splicing factor 1	SRSF1_HUMAN	315.177	842	8.30002
Q07960	ARHGAP1	Rho GTPase-activating protein 1	RHG01_HUMAN	7748.16	918	12.9196				Q07960	ARHGAP1	Rho GTPase-activating protein 1	RHG01_HUMAN	424.999	704	8.73131
Q08209	PPP3CA	Serine/threonine-protein phosphatase 2B catalytic subunit alpha isoform	PP2BA_HUMAN	10489.5	783	13.3567				Q08209	PPP3CA	Serine/threonine-protein phosphatase 2B catalytic subunit alpha isoform	PP2BA_HUMAN	322.569	831	8.33347
Q08211	DHX9	ATP-dependent RNA helicase A	DHX9_HUMAN	47482.4	197	15.5351				Q08211	DHX9	ATP-dependent RNA helicase A	DHX9_HUMAN	1440.67	219	10.4925
Q08945	SSRP1	FACT complex subunit SSRP1	SSRP1_HUMAN	27484.4	342	14.7463				Q08945	SSRP1	FACT complex subunit SSRP1	SSRP1_HUMAN	667.015	474	9.38158
Q08J23	NSUN2	tRNA (cytosine(34)-C(5))-methyltransferase	NSUN2_HUMAN	6703.12	981	12.7106				Q08J23	NSUN2	tRNA (cytosine(34)-C(5))-methyltransferase	NSUN2_HUMAN	238.861	962	7.90003
Q09028	RBBP4	Histone-binding protein RBBP4	RBBP4_HUMAN	11753.7	723	13.5208				Q09028	RBBP4	Histone-binding protein RBBP4	RBBP4_HUMAN	298.285	872	8.22055
Q09161	NCBP1	Nuclear cap-binding protein subunit 1	NCBP1_HUMAN	11530.8	732	13.4932				Q09161	NCBP1	Nuclear cap-binding protein subunit 1	NCBP1_HUMAN	354.05	787	8.46781
Q09666	AHNAK	Neuroblast differentiation-associated protein AHNAK	AHNK_HUMAN	155900	49	17.2503				Q09666	AHNAK	Neuroblast differentiation-associated protein AHNAK	AHNK_HUMAN	4042.84	62	11.9812
Q10567	AP1B1	AP-1 complex subunit beta-1	AP1B1_HUMAN	10027	801	13.2916				Q10567	AP1B1	AP-1 complex subunit beta-1	AP1B1_HUMAN	240.423	959	7.90943
Q10589	BST2	Bone marrow stromal antigen 2	BST2_HUMAN	4707.6	1103	12.2008				Q10589	BST2	Bone marrow stromal antigen 2	BST2_HUMAN	216.732	999	7.75977
Q12765	SCRN1	Secernin-1	SCRN1_HUMAN	5506.85	1058	12.427				Q12765	SCRN1	Secernin-1	SCRN1_HUMAN	144.223	1112	7.17215
Q12792	TWF1	Twinfilin-1	TWF1_HUMAN	8335.49	886	13.0251				Q12792	TWF1	Twinfilin-1	TWF1_HUMAN	451.972	677	8.82009
Q12849	GRSF1	G-rich sequence factor 1	GRSF1_HUMAN	7439.16	943	12.8609				Q12849	GRSF1	G-rich sequence factor 1	GRSF1_HUMAN	392.04	743	8.61486
Q12874	SF3A3	Splicing factor 3A subunit 3	SF3A3_HUMAN	4547.23	1113	12.1508				Q12874	SF3A3	Splicing factor 3A subunit 3	SF3A3_HUMAN	252.547	942	7.98041
Q12904	AIMP1	Aminoacyl tRNA synthase complex-interacting multifunctional protein 1	AIMP1_HUMAN	7499.48	939	12.8726				Q12904	AIMP1	Aminoacyl tRNA synthase complex-interacting multifunctional protein 1	AIMP1_HUMAN	572.611	551	9.16141
Q12905	ILF2	Interleukin enhancer-binding factor 2	ILF2_HUMAN	21537.7	425	14.3946				Q12905	ILF2	Interleukin enhancer-binding factor 2	ILF2_HUMAN	423.446	709	8.72603
Q12906	ILF3	Interleukin enhancer-binding factor 3	ILF3_HUMAN	30501.9	316	14.8966				Q12906	ILF3	Interleukin enhancer-binding factor 3	ILF3_HUMAN	795.524	394	9.63576
Q12907	LMAN2	Vesicular integral-membrane protein VIP36	LMAN2_HUMAN	9263	831	13.1773				Q12907	LMAN2	Vesicular integral-membrane protein VIP36	LMAN2_HUMAN	280.695	893	8.13286
Q13045	FLII	Protein flightless-1 homolog	FLII_HUMAN	5472.51	1061	12.418				Q13045	FLII	Protein flightless-1 homolog	FLII_HUMAN	201.957	1026	7.65791
Q13098	GPS1	COP9 signalosome complex subunit 1	CSN1_HUMAN	6250.59	1001	12.6098				Q13098	GPS1	COP9 signalosome complex subunit 1	CSN1_HUMAN	210.151	1007	7.71528
Q13148	TARDBP	TAR DNA-binding protein 43	TADBP_HUMAN	12358.7	699	13.5932				Q13148	TARDBP	TAR DNA-binding protein 43	TADBP_HUMAN	399.163	736	8.64083
Q13155	AIMP2	Aminoacyl tRNA synthase complex-interacting multifunctional protein 2	AIMP2_HUMAN	9330.9	827	13.1878				Q13155	AIMP2	Aminoacyl tRNA synthase complex-interacting multifunctional protein 2	AIMP2_HUMAN	156.206	1093	7.2873
Q13177	PAK2	Serine/threonine-protein kinase PAK 2	PAK2_HUMAN	17732.2	517	14.1141				Q13177	PAK2	Serine/threonine-protein kinase PAK 2	PAK2_HUMAN	510.349	614	8.99534
Q13185	CBX3	Chromobox protein homolog 3	CBX3_HUMAN	15800.9	563	13.9477				Q13185	CBX3	Chromobox protein homolog 3	CBX3_HUMAN	433.489	698	8.75985
Q13200	PSMD2	26S proteasome non-ATPase regulatory subunit 2	PSMD2_HUMAN	15859.8	560	13.9531				Q13200	PSMD2	26S proteasome non-ATPase regulatory subunit 2	PSMD2_HUMAN	506.915	623	8.9856
Q13242	SRSF9	Serine/arginine-rich splicing factor 9	SRSF9_HUMAN	11545.2	730	13.495				Q13242	SRSF9	Serine/arginine-rich splicing factor 9	SRSF9_HUMAN	4100.64	60	12.0016
Q13247	SRSF6	Serine/arginine-rich splicing factor 6	SRSF6_HUMAN	52078.5	175	15.6684				Q13247	SRSF6	Serine/arginine-rich splicing factor 6	SRSF6_HUMAN	2394.64	117	11.2256
Q13263	TRIM28	Transcription intermediary factor 1-beta	TIF1B_HUMAN	13947.9	624	13.7678				Q13263	TRIM28	Transcription intermediary factor 1-beta	TIF1B_HUMAN	511.103	612	8.99747
Q13283	G3BP1	Ras GTPase-activating protein-binding protein 1	G3BP1_HUMAN	54314.4	167	15.729				Q13283	G3BP1	Ras GTPase-activating protein-binding protein 1	G3BP1_HUMAN	1282.97	247	10.3253
Q13310	PABPC4	Polyadenylate-binding protein 4	PABP4_HUMAN	11479.6	736	13.4868				Q13310	PABPC4	Polyadenylate-binding protein 4	PABP4_HUMAN	351.205	790	8.45617
Q13347	EIF3I	Eukaryotic translation initiation factor 3 subunit I	EIF3I_HUMAN	24138.6	373	14.5591				Q13347	EIF3I	Eukaryotic translation initiation factor 3 subunit I	EIF3I_HUMAN	809.864	388	9.66154
Q13363	CTBP1	C-terminal-binding protein 1	CTBP1_HUMAN	3142.78	1155	11.6178				Q13363	CTBP1	C-terminal-binding protein 1	CTBP1_HUMAN	266.416	920	8.05754
Q13404	UBE2V1	Ubiquitin-conjugating enzyme E2 variant 1	UB2V1_HUMAN	42059.6	230	15.3601				Q13404	UBE2V1	Ubiquitin-conjugating enzyme E2 variant 1	UB2V1_HUMAN	1069.92	303	10.0633
Q13409	DYNC1I2	Cytoplasmic dynein 1 intermediate chain 2	DC1I2_HUMAN	8583.88	862	13.0674				Q13409	DYNC1I2	Cytoplasmic dynein 1 intermediate chain 2	DC1I2_HUMAN	474.928	647	8.89157
Q13418	ILK	Integrin-linked protein kinase	ILK_HUMAN	3698.66	1141	11.8528				Q13418	ILK	Integrin-linked protein kinase	ILK_HUMAN	150.936	1098	7.2378
Q13423	NNT	NAD(P) transhydrogenase, mitochondrial	NNTM_HUMAN	2745.3	1168	11.4227				Q13423	NNT	NAD(P) transhydrogenase, mitochondrial	NNTM_HUMAN	107.797	1158	6.75217
Q13428	TCOF1	Treacle protein	TCOF_HUMAN	36669.6	254	15.1623				Q13428	TCOF1	Treacle protein	TCOF_HUMAN	457.768	668	8.83847
Q13435	SF3B2	Splicing factor 3B subunit 2	SF3B2_HUMAN	10182.3	795	13.3138				Q13435	SF3B2	Splicing factor 3B subunit 2	SF3B2_HUMAN	443.075	683	8.79141
Q13442	PDAP1	28 kDa heat- and acid-stable phosphoprotein	HAP28_HUMAN	10563.7	781	13.3668				Q13442	PDAP1	28 kDa heat- and acid-stable phosphoprotein	HAP28_HUMAN	534.008	591	9.06072
Q13523	PRPF4B	Serine/threonine-protein kinase PRP4 homolog	PRP4B_HUMAN	324523	19	18.308				Q13523	PRPF4B	Serine/threonine-protein kinase PRP4 homolog	PRP4B_HUMAN	18929.1	12	14.2083
Q13561	DCTN2	Dynactin subunit 2	DCTN2_HUMAN	17520.3	522	14.0967				Q13561	DCTN2	Dynactin subunit 2	DCTN2_HUMAN	301.422	865	8.23564
Q13620	CUL4B	Cullin-4B	CUL4B_HUMAN	5091.31	1080	12.3138				Q13620	CUL4B	Cullin-4B	CUL4B_HUMAN	163.476	1087	7.35294
Q13813	SPTAN1	Spectrin alpha chain, non-erythrocytic 1	SPTN1_HUMAN	24725.1	370	14.5937				Q13813	SPTAN1	Spectrin alpha chain, non-erythrocytic 1	SPTN1_HUMAN	882.623	362	9.78565
Q13838	DDX39B	Spliceosome RNA helicase DDX39B	DX39B_HUMAN	12484.7	695	13.6079				Q13838	DDX39B	Spliceosome RNA helicase DDX39B	DX39B_HUMAN	140.944	1119	7.13898
Q13885	TUBB2A	Tubulin beta-2A chain	TBB2A_HUMAN	21931.6	412	14.4207				Q13885	TUBB2A	Tubulin beta-2A chain	TBB2A_HUMAN	314.234	845	8.29569
Q14008	CKAP5	Cytoskeleton-associated protein 5	CKAP5_HUMAN	5013.73	1088	12.2917				Q14008	CKAP5	Cytoskeleton-associated protein 5	CKAP5_HUMAN	253.419	937	7.98538
Q14011	CIRBP	Cold-inducible RNA-binding protein	CIRBP_HUMAN	14496.1	604	13.8234				Q14011	CIRBP	Cold-inducible RNA-binding protein	CIRBP_HUMAN	253.544	935	7.98609
Q14019	COTL1	Coactosin-like protein	COTL1_HUMAN	30758.6	312	14.9087				Q14019	COTL1	Coactosin-like protein	COTL1_HUMAN	1039.46	309	10.0216
Q14061	COX17	Cytochrome c oxidase copper chaperone	COX17_HUMAN	10926.2	760	13.4155				Q14061	COX17	Cytochrome c oxidase copper chaperone	COX17_HUMAN	175.605	1070	7.45619
Q14103	HNRNPD	Heterogeneous nuclear ribonucleoprotein D0	HNRPD_HUMAN	86292.6	93	16.3969				Q14103	HNRNPD	Heterogeneous nuclear ribonucleoprotein D0	HNRPD_HUMAN	3579.1	72	11.8054
Q14118	DAG1	Dystroglycan	DAG1_HUMAN	5824.9	1036	12.508				Q14118	DAG1	Dystroglycan	DAG1_HUMAN	192.313	1042	7.58731
Q14151	SAFB2	Scaffold attachment factor B2	SAFB2_HUMAN	12346.9	700	13.5919				Q14151	SAFB2	Scaffold attachment factor B2	SAFB2_HUMAN	371.119	766	8.53574
Q14152	EIF3A	Eukaryotic translation initiation factor 3 subunit A	EIF3A_HUMAN	31920.4	297	14.9622				Q14152	EIF3A	Eukaryotic translation initiation factor 3 subunit A	EIF3A_HUMAN	563.178	562	9.13745
Q14203	DCTN1	Dynactin subunit 1	DCTN1_HUMAN	7813.88	914	12.9318				Q14203	DCTN1	Dynactin subunit 1	DCTN1_HUMAN	67.8764	1180	6.08484
Q14204	DYNC1H1	Cytoplasmic dynein 1 heavy chain 1	DYHC1_HUMAN	29261.4	325	14.8367				Q14204	DYNC1H1	Cytoplasmic dynein 1 heavy chain 1	DYHC1_HUMAN	842.712	379	9.7189
Q14247	CTTN	Src substrate cortactin	SRC8_HUMAN	28197.1	336	14.7833				Q14247	CTTN	Src substrate cortactin	SRC8_HUMAN	953.252	337	9.89671
Q14258	TRIM25	E3 ubiquitin/ISG15 ligase TRIM25	TRI25_HUMAN	3467.34	1147	11.7596				Q14258	TRIM25	E3 ubiquitin/ISG15 ligase TRIM25	TRI25_HUMAN	275.204	903	8.10436
Q14315	FLNC	Filamin-C	FLNC_HUMAN	117728	69	16.8451				Q14315	FLNC	Filamin-C	FLNC_HUMAN	2759.61	94	11.4302
Q14320	FAM50A	Protein FAM50A	FA50A_HUMAN	19204.8	476	14.2292				Q14320	FAM50A	Protein FAM50A	FA50A_HUMAN	632.821	501	9.30565
Q14444	CAPRIN1	Caprin-1	CAPR1_HUMAN	10472.7	784	13.3544				Q14444	CAPRIN1	Caprin-1	CAPR1_HUMAN	455.569	672	8.83153
Q14498	RBM39	RNA-binding protein 39	RBM39_HUMAN	5763.01	1042	12.4926				Q14498	RBM39	RNA-binding protein 39	RBM39_HUMAN	234.94	968	7.87615
Q14566	MCM6	DNA replication licensing factor MCM6	MCM6_HUMAN	6586.15	987	12.6852				Q14566	MCM6	DNA replication licensing factor MCM6	MCM6_HUMAN	258.365	928	8.01326
Q14683	SMC1A	Structural maintenance of chromosomes protein 1A	SMC1A_HUMAN	9779.64	806	13.2556				Q14683	SMC1A	Structural maintenance of chromosomes protein 1A	SMC1A_HUMAN	291.32	879	8.18646
Q14696	MESD	LRP chaperone MESD	MESD_HUMAN	7606.17	928	12.893				Q14696	MESD	LRP chaperone MESD	MESD_HUMAN	362.893	774	8.5034
Q14697	GANAB	Neutral alpha-glucosidase AB	GANAB_HUMAN	36186.6	261	15.1432				Q14697	GANAB	Neutral alpha-glucosidase AB	GANAB_HUMAN	1061.54	304	10.0519
Q14739	LBR	Delta(14)-sterol reductase	LBR_HUMAN	13890.3	628	13.7618				Q14739	LBR	Delta(14)-sterol reductase	LBR_HUMAN	479.068	639	8.90409
Q14764	MVP	Major vault protein	MVP_HUMAN	5988.33	1021	12.5479				Q14764	MVP	Major vault protein	MVP_HUMAN	424.984	705	8.73127
Q14839	CHD4	Chromodomain-helicase-DNA-binding protein 4	CHD4_HUMAN	8514.76	867	13.0558				Q14839	CHD4	Chromodomain-helicase-DNA-binding protein 4	CHD4_HUMAN	305.152	857	8.25338
Q14847	LASP1	LIM and SH3 domain protein 1	LASP1_HUMAN	106749	74	16.7039				Q14847	LASP1	LIM and SH3 domain protein 1	LASP1_HUMAN	4447.47	54	12.1188
Q14914	PTGR1	Prostaglandin reductase 1	PTGR1_HUMAN	7100.23	964	12.7936				Q14914	PTGR1	Prostaglandin reductase 1	PTGR1_HUMAN	207.395	1016	7.69624
Q14919	DRAP1	Dr1-associated corepressor	NC2A_HUMAN	24243.4	372	14.5653				Q14919	DRAP1	Dr1-associated corepressor	NC2A_HUMAN	418.129	715	8.7078
Q14974	KPNB1	Importin subunit beta-1	IMB1_HUMAN	70037.9	123	16.0958				Q14974	KPNB1	Importin subunit beta-1	IMB1_HUMAN	2227.06	129	11.1209
Q14978	NOLC1	Nucleolar and coiled-body phosphoprotein 1	NOLC1_HUMAN	18643.3	493	14.1864				Q14978	NOLC1	Nucleolar and coiled-body phosphoprotein 1	NOLC1_HUMAN	841.439	380	9.71671
Q14980	NUMA1	Nuclear mitotic apparatus protein 1	NUMA1_HUMAN	7915.65	905	12.9505				Q14980	NUMA1	Nuclear mitotic apparatus protein 1	NUMA1_HUMAN	270.984	908	8.08206
Q15003	NCAPH	Condensin complex subunit 2	CND2_HUMAN	3122.22	1156	11.6084				Q15003	NCAPH	Condensin complex subunit 2	CND2_HUMAN	127.079	1135	6.98958
Q15008	PSMD6	26S proteasome non-ATPase regulatory subunit 6	PSMD6_HUMAN	18611.1	494	14.1839				Q15008	PSMD6	26S proteasome non-ATPase regulatory subunit 6	PSMD6_HUMAN	282.309	890	8.14113
Q15019	2021-09-02	Septin-2	SEPT2_HUMAN	12736.9	679	13.6367				Q15019	2021-09-02	Septin-2	SEPT2_HUMAN	456.82	670	8.83548
Q15020	SART3	Squamous cell carcinoma antigen recognized by T-cells 3	SART3_HUMAN	9109.96	842	13.1532				Q15020	SART3	Squamous cell carcinoma antigen recognized by T-cells 3	SART3_HUMAN	143.786	1113	7.16778
Q15021	NCAPD2	Condensin complex subunit 1	CND1_HUMAN	4380.7	1119	12.0969				Q15021	NCAPD2	Condensin complex subunit 1	CND1_HUMAN	389.098	747	8.60399
Q15029	EFTUD2	116 kDa U5 small nuclear ribonucleoprotein component	U5S1_HUMAN	14481.4	607	13.8219				Q15029	EFTUD2	116 kDa U5 small nuclear ribonucleoprotein component	U5S1_HUMAN	179.558	1061	7.48831
Q15046	KARS	Lysine--tRNA ligase	SYK_HUMAN	8229	890	13.0065				Q15046	KARS	Lysine--tRNA ligase	SYK_HUMAN	286.889	885	8.16435
Q15056	EIF4H	Eukaryotic translation initiation factor 4H	IF4H_HUMAN	15753.1	564	13.9433				Q15056	EIF4H	Eukaryotic translation initiation factor 4H	IF4H_HUMAN	283.13	889	8.14532
Q15084	PDIA6	Protein disulfide-isomerase A6	PDIA6_HUMAN	15020.1	583	13.8746				Q15084	PDIA6	Protein disulfide-isomerase A6	PDIA6_HUMAN	434.162	697	8.76209
Q15102	PAFAH1B3	Platelet-activating factor acetylhydrolase IB subunit gamma	PA1B3_HUMAN	21000.6	432	14.3581				Q15102	PAFAH1B3	Platelet-activating factor acetylhydrolase IB subunit gamma	PA1B3_HUMAN	606.166	526	9.24357
Q15121	PEA15	Astrocytic phosphoprotein PEA-15	PEA15_HUMAN	17996.7	514	14.1354				Q15121	PEA15	Astrocytic phosphoprotein PEA-15	PEA15_HUMAN	1338.83	237	10.3868
Q15149	PLEC	Plectin	PLEC_HUMAN	95530.8	81	16.5437				Q15149	PLEC	Plectin	PLEC_HUMAN	2175.06	133	11.0868
Q15181	PPA1	Inorganic pyrophosphatase	IPYR_HUMAN	32492.3	289	14.9878				Q15181	PPA1	Inorganic pyrophosphatase	IPYR_HUMAN	957.9	336	9.90373
Q15185	PTGES3	Prostaglandin E synthase 3	TEBP_HUMAN	60042.9	150	15.8737				Q15185	PTGES3	Prostaglandin E synthase 3	TEBP_HUMAN	2037.23	148	10.9924
Q15233	NONO	Non-POU domain-containing octamer-binding protein	NONO_HUMAN	77119.3	108	16.2348				Q15233	NONO	Non-POU domain-containing octamer-binding protein	NONO_HUMAN	3298.89	77	11.6878
Q15293	RCN1	Reticulocalbin-1	RCN1_HUMAN	18768.9	488	14.1961				Q15293	RCN1	Reticulocalbin-1	RCN1_HUMAN	743.494	423	9.53818
Q15365	PCBP1	Poly(rC)-binding protein 1	PCBP1_HUMAN	55135.2	164	15.7507				Q15365	PCBP1	Poly(rC)-binding protein 1	PCBP1_HUMAN	1605.29	191	10.6486
Q15366	PCBP2	Poly(rC)-binding protein 2	PCBP2_HUMAN	120040	66	16.8732				Q15366	PCBP2	Poly(rC)-binding protein 2	PCBP2_HUMAN	3905.05	65	11.9311
Q15370	ELOB	Elongin-B	ELOB_HUMAN	18348.8	504	14.1634				Q15370	ELOB	Elongin-B	ELOB_HUMAN	509.036	618	8.99162
Q15382	RHEB	GTP-binding protein Rheb	RHEB_HUMAN	8459.66	872	13.0464				Q15382	RHEB	GTP-binding protein Rheb	RHEB_HUMAN	716.888	441	9.4856
Q15393	SF3B3	Splicing factor 3B subunit 3	SF3B3_HUMAN	10394.9	788	13.3436				Q15393	SF3B3	Splicing factor 3B subunit 3	SF3B3_HUMAN	292.962	875	8.19457
Q15417	CNN3	Calponin-3	CNN3_HUMAN	13112.4	661	13.6786				Q15417	CNN3	Calponin-3	CNN3_HUMAN	621.662	513	9.27999
Q15424	SAFB	Scaffold attachment factor B1	SAFB1_HUMAN	4610.34	1109	12.1707				Q15424	SAFB	Scaffold attachment factor B1	SAFB1_HUMAN	205.436	1020	7.68255
Q15427	SF3B4	Splicing factor 3B subunit 4	SF3B4_HUMAN	8357.6	884	13.0289				Q15427	SF3B4	Splicing factor 3B subunit 4	SF3B4_HUMAN	173.478	1072	7.43861
Q15459	SF3A1	Splicing factor 3A subunit 1	SF3A1_HUMAN	14092.9	619	13.7827				Q15459	SF3A1	Splicing factor 3A subunit 1	SF3A1_HUMAN	547.05	577	9.09553
Q15631	TSN	Translin	TSN_HUMAN	17361	527	14.0836				Q15631	TSN	Translin	TSN_HUMAN	592.952	536	9.21177
Q15637	SF1	Splicing factor 1	SF01_HUMAN	9426.61	825	13.2025				Q15637	SF1	Splicing factor 1	SF01_HUMAN	224.311	987	7.80935
Q15642	TRIP10	Cdc42-interacting protein 4	CIP4_HUMAN	7878.4	910	12.9437				Q15642	TRIP10	Cdc42-interacting protein 4	CIP4_HUMAN	327.582	826	8.35571
Q15691	MAPRE1	Microtubule-associated protein RP/EB family member 1	MARE1_HUMAN	38025.3	247	15.2147				Q15691	MAPRE1	Microtubule-associated protein RP/EB family member 1	MARE1_HUMAN	1611.4	189	10.6541
Q15717	ELAVL1	ELAV-like protein 1	ELAV1_HUMAN	17177.4	530	14.0682				Q15717	ELAVL1	ELAV-like protein 1	ELAV1_HUMAN	1157.37	278	10.1766
Q15738	NSDHL	Sterol-4-alpha-carboxylate 3-dehydrogenase, decarboxylating	NSDHL_HUMAN	4942.9	1093	12.2711				Q15738	NSDHL	Sterol-4-alpha-carboxylate 3-dehydrogenase, decarboxylating	NSDHL_HUMAN	265.579	921	8.053
Q15785	TOMM34	Mitochondrial import receptor subunit TOM34	TOM34_HUMAN	3928.43	1136	11.9397				Q15785	TOMM34	Mitochondrial import receptor subunit TOM34	TOM34_HUMAN	706.24	449	9.46401
Q15819	UBE2V2	Ubiquitin-conjugating enzyme E2 variant 2	UB2V2_HUMAN	21824.7	419	14.4137				Q15819	UBE2V2	Ubiquitin-conjugating enzyme E2 variant 2	UB2V2_HUMAN	468.014	658	8.87041
Q15843	NEDD8	NEDD8	NEDD8_HUMAN	16827.8	541	14.0386				Q15843	NEDD8	NEDD8	NEDD8_HUMAN	342.094	803	8.41825
Q15942	ZYX	Zyxin	ZYX_HUMAN	18742.4	489	14.194				Q15942	ZYX	Zyxin	ZYX_HUMAN	745.007	422	9.54111
Q16181	2021-09-07	Septin-7	SEPT7_HUMAN	5746.04	1043	12.4884				Q16181	2021-09-07	Septin-7	SEPT7_HUMAN	275.729	901	8.10711
Q16204	CCDC6	Coiled-coil domain-containing protein 6	CCDC6_HUMAN	3005	1160	11.5531				Q16204	CCDC6	Coiled-coil domain-containing protein 6	CCDC6_HUMAN	179.223	1062	7.48561
Q16222	UAP1	UDP-N-acetylhexosamine pyrophosphorylase	UAP1_HUMAN	28837.9	331	14.8157				Q16222	UAP1	UDP-N-acetylhexosamine pyrophosphorylase	UAP1_HUMAN	673.289	466	9.39508
Q16401	PSMD5	26S proteasome non-ATPase regulatory subunit 5	PSMD5_HUMAN	12827.4	674	13.6469				Q16401	PSMD5	26S proteasome non-ATPase regulatory subunit 5	PSMD5_HUMAN	205.112	1021	7.68027
Q16531	DDB1	DNA damage-binding protein 1	DDB1_HUMAN	13534.2	640	13.7243				Q16531	DDB1	DNA damage-binding protein 1	DDB1_HUMAN	384.074	751	8.58524
Q16539	MAPK14	Mitogen-activated protein kinase 14	MK14_HUMAN	7914.55	906	12.9503				Q16539	MAPK14	Mitogen-activated protein kinase 14	MK14_HUMAN	201.431	1027	7.65414
Q16543	CDC37	Hsp90 co-chaperone Cdc37	CDC37_HUMAN	15571.9	569	13.9267				Q16543	CDC37	Hsp90 co-chaperone Cdc37	CDC37_HUMAN	508.114	620	8.98901
Q16555	DPYSL2	Dihydropyrimidinase-related protein 2	DPYL2_HUMAN	37230.4	252	15.1842				Q16555	DPYSL2	Dihydropyrimidinase-related protein 2	DPYL2_HUMAN	1073.63	301	10.0683
Q16576	RBBP7	Histone-binding protein RBBP7	RBBP7_HUMAN	8789.06	855	13.1015				Q16576	RBBP7	Histone-binding protein RBBP7	RBBP7_HUMAN	423.968	707	8.72781
Q16629	SRSF7	Serine/arginine-rich splicing factor 7	SRSF7_HUMAN	54392.5	166	15.7311				Q16629	SRSF7	Serine/arginine-rich splicing factor 7	SRSF7_HUMAN	1610.82	190	10.6536
Q16630	CPSF6	Cleavage and polyadenylation specificity factor subunit 6	CPSF6_HUMAN	10197.2	794	13.3159				Q16630	CPSF6	Cleavage and polyadenylation specificity factor subunit 6	CPSF6_HUMAN	270.091	911	8.0773
Q16666	IFI16	Gamma-interferon-inducible protein 16	IF16_HUMAN	6207.42	1006	12.5998				Q16666	IFI16	Gamma-interferon-inducible protein 16	IF16_HUMAN	321.266	834	8.32762
Q16698	DECR1	2,4-dienoyl-CoA reductase, mitochondrial	DECR_HUMAN	5155.94	1073	12.332				Q16698	DECR1	2,4-dienoyl-CoA reductase, mitochondrial	DECR_HUMAN	141.697	1116	7.14666
Q16881	TXNRD1	Thioredoxin reductase 1, cytoplasmic	TRXR1_HUMAN	47139.9	200	15.5247				Q16881	TXNRD1	Thioredoxin reductase 1, cytoplasmic	TRXR1_HUMAN	1160.67	277	10.1807
Q16891	IMMT	MICOS complex subunit MIC60	MIC60_HUMAN	6728.97	980	12.7162				Q16891	IMMT	MICOS complex subunit MIC60	MIC60_HUMAN	289.282	880	8.17633
Q1KMD3	HNRNPUL2	Heterogeneous nuclear ribonucleoprotein U-like protein 2	HNRL2_HUMAN	12206.1	710	13.5753				Q1KMD3	HNRNPUL2	Heterogeneous nuclear ribonucleoprotein U-like protein 2	HNRL2_HUMAN	516.889	607	9.01371
Q29RF7	PDS5A	Sister chromatid cohesion protein PDS5 homolog A	PDS5A_HUMAN	3240.75	1152	11.6621				Q29RF7	PDS5A	Sister chromatid cohesion protein PDS5 homolog A	PDS5A_HUMAN	286.964	884	8.16472
Q32MZ4	LRRFIP1	Leucine-rich repeat flightless-interacting protein 1	LRRF1_HUMAN	2759.04	1167	11.4299				Q32MZ4	LRRFIP1	Leucine-rich repeat flightless-interacting protein 1	LRRF1_HUMAN	171.405	1076	7.42126
Q32P28	P3H1	Prolyl 3-hydroxylase 1	P3H1_HUMAN	7717.42	920	12.9139				Q32P28	P3H1	Prolyl 3-hydroxylase 1	P3H1_HUMAN	218.727	993	7.77299
Q58FF6	HSP90AB4P	Putative heat shock protein HSP 90-beta 4	H90B4_HUMAN	10091.4	797	13.3008				Q58FF6	HSP90AB4P	Putative heat shock protein HSP 90-beta 4	H90B4_HUMAN	165.666	1082	7.37214
Q5H9R7	PPP6R3	Serine/threonine-protein phosphatase 6 regulatory subunit 3	PP6R3_HUMAN	1982.07	1179	10.9528				Q5H9R7	PPP6R3	Serine/threonine-protein phosphatase 6 regulatory subunit 3	PP6R3_HUMAN	265.524	922	8.0527
Q5RKV6	EXOSC6	Exosome complex component MTR3	EXOS6_HUMAN	12529.8	692	13.6131				Q5RKV6	EXOSC6	Exosome complex component MTR3	EXOS6_HUMAN	317.26	839	8.30952
Q5SW79	CEP170	Centrosomal protein of 170 kDa	CE170_HUMAN	3591.81	1144	11.8105				Q5SW79	CEP170	Centrosomal protein of 170 kDa	CE170_HUMAN	106.017	1159	6.72815
Q5T6F2	UBAP2	Ubiquitin-associated protein 2	UBAP2_HUMAN	2811.7	1166	11.4572				Q5T6F2	UBAP2	Ubiquitin-associated protein 2	UBAP2_HUMAN	100.13	1164	6.64573
Q6DKJ4	NXN	Nucleoredoxin	NXN_HUMAN	50560.8	182	15.6257				Q6DKJ4	NXN	Nucleoredoxin	NXN_HUMAN	3559.18	73	11.7973
Q6FI81	CIAPIN1	Anamorsin	CPIN1_HUMAN	12849.2	673	13.6494				Q6FI81	CIAPIN1	Anamorsin	CPIN1_HUMAN	331.799	822	8.37416
Q6IAA8	LAMTOR1	Ragulator complex protein LAMTOR1	LTOR1_HUMAN	12666.9	685	13.6288				Q6IAA8	LAMTOR1	Ragulator complex protein LAMTOR1	LTOR1_HUMAN	549.547	575	9.1021
Q6NUK1	SLC25A24	Calcium-binding mitochondrial carrier protein SCaMC-1	SCMC1_HUMAN	14899.2	589	13.8629				Q6NUK1	SLC25A24	Calcium-binding mitochondrial carrier protein SCaMC-1	SCMC1_HUMAN	268.044	916	8.06633
Q6NZI2	CAVIN1	Caveolae-associated protein 1	CAVN1_HUMAN	31895.7	299	14.9611				Q6NZI2	CAVIN1	Caveolae-associated protein 1	CAVN1_HUMAN	810.857	386	9.6633
Q6P1J9	CDC73	Parafibromin	CDC73_HUMAN	1155.61	1185	10.1744				Q6P1J9	CDC73	Parafibromin	CDC73_HUMAN	332.728	818	8.3782
Q6P2Q9	PRPF8	Pre-mRNA-processing-splicing factor 8	PRP8_HUMAN	8211.66	891	13.0035				Q6P2Q9	PRPF8	Pre-mRNA-processing-splicing factor 8	PRP8_HUMAN	211.485	1004	7.72441
Q6PJT7	ZC3H14	Zinc finger CCCH domain-containing protein 14	ZC3HE_HUMAN	5425.39	1063	12.4055				Q6PJT7	ZC3H14	Zinc finger CCCH domain-containing protein 14	ZC3HE_HUMAN	146.053	1110	7.19035
Q6PKG0	LARP1	La-related protein 1	LARP1_HUMAN	11204.2	748	13.4518				Q6PKG0	LARP1	La-related protein 1	LARP1_HUMAN	301.43	864	8.23568
Q7KZF4	SND1	Staphylococcal nuclease domain-containing protein 1	SND1_HUMAN	34697.2	272	15.0825				Q7KZF4	SND1	Staphylococcal nuclease domain-containing protein 1	SND1_HUMAN	994.685	325	9.9581
Q7L014	DDX46	Probable ATP-dependent RNA helicase DDX46	DDX46_HUMAN	18416.2	500	14.1687				Q7L014	DDX46	Probable ATP-dependent RNA helicase DDX46	DDX46_HUMAN	768.847	409	9.58655
Q7L1Q6	BZW1	Basic leucine zipper and W2 domain-containing protein 1	BZW1_HUMAN	13207.1	659	13.689				Q7L1Q6	BZW1	Basic leucine zipper and W2 domain-containing protein 1	BZW1_HUMAN	399.97	734	8.64375
Q7L2E3	DHX30	ATP-dependent RNA helicase DHX30	DHX30_HUMAN	14700	594	13.8435				Q7L2E3	DHX30	ATP-dependent RNA helicase DHX30	DHX30_HUMAN	184.803	1054	7.52985
Q7L576	CYFIP1	Cytoplasmic FMR1-interacting protein 1	CYFP1_HUMAN	4769.58	1100	12.2196				Q7L576	CYFIP1	Cytoplasmic FMR1-interacting protein 1	CYFP1_HUMAN	63.5002	1181	5.98869
Q7Z2W4	ZC3HAV1	Zinc finger CCCH-type antiviral protein 1	ZCCHV_HUMAN	5165.84	1072	12.3348				Q7Z2W4	ZC3HAV1	Zinc finger CCCH-type antiviral protein 1	ZCCHV_HUMAN	196.541	1037	7.61869
Q7Z478	DHX29	ATP-dependent RNA helicase DHX29	DHX29_HUMAN	3527.28	1145	11.7843				Q7Z478	DHX29	ATP-dependent RNA helicase DHX29	DHX29_HUMAN	221.205	989	7.78924
Q7Z4V5	HDGFL2	Hepatoma-derived growth factor-related protein 2	HDGR2_HUMAN	5256.52	1069	12.3599				Q7Z4V5	HDGFL2	Hepatoma-derived growth factor-related protein 2	HDGR2_HUMAN	69.5143	1179	6.11924
Q7Z6Z7	HUWE1	E3 ubiquitin-protein ligase HUWE1	HUWE1_HUMAN	6223.7	1005	12.6036				Q7Z6Z7	HUWE1	E3 ubiquitin-protein ligase HUWE1	HUWE1_HUMAN	163.076	1088	7.3494
Q7Z739	YTHDF3	YTH domain-containing family protein 3	YTHD3_HUMAN	12319.6	701	13.5887				Q7Z739	YTHDF3	YTH domain-containing family protein 3	YTHD3_HUMAN	377.392	761	8.55992
Q86U42	PABPN1	Polyadenylate-binding protein 2	PABP2_HUMAN	10429.6	786	13.3484				Q86U42	PABPN1	Polyadenylate-binding protein 2	PABP2_HUMAN	386.265	750	8.59345
Q86UE4	MTDH	Protein LYRIC	LYRIC_HUMAN	2980.01	1161	11.5411				Q86UE4	MTDH	Protein LYRIC	LYRIC_HUMAN	206.878	1017	7.69264
Q86UP2	KTN1	Kinectin	KTN1_HUMAN	6062.73	1015	12.5658				Q86UP2	KTN1	Kinectin	KTN1_HUMAN	117.962	1150	6.88218
Q86V81	ALYREF	THO complex subunit 4	THOC4_HUMAN	15940.9	557	13.9604				Q86V81	ALYREF	THO complex subunit 4	THOC4_HUMAN	328.942	824	8.36169
Q86VP6	CAND1	Cullin-associated NEDD8-dissociated protein 1	CAND1_HUMAN	21969.7	410	14.4232				Q86VP6	CAND1	Cullin-associated NEDD8-dissociated protein 1	CAND1_HUMAN	655.518	482	9.35649
Q86XP3	DDX42	ATP-dependent RNA helicase DDX42	DDX42_HUMAN	4533.8	1114	12.1465				Q86XP3	DDX42	ATP-dependent RNA helicase DDX42	DDX42_HUMAN	1246.68	257	10.2839
Q8IVM0	CCDC50	Coiled-coil domain-containing protein 50	CCD50_HUMAN	4240.94	1125	12.0502				Q8IVM0	CCDC50	Coiled-coil domain-containing protein 50	CCD50_HUMAN	123.163	1144	6.94442
Q8IWX8	CHERP	Calcium homeostasis endoplasmic reticulum protein	CHERP_HUMAN	2553.81	1175	11.3184				Q8IWX8	CHERP	Calcium homeostasis endoplasmic reticulum protein	CHERP_HUMAN	145.397	1111	7.18385
Q8IX12	CCAR1	Cell division cycle and apoptosis regulator protein 1	CCAR1_HUMAN	5052.07	1084	12.3027				Q8IX12	CCAR1	Cell division cycle and apoptosis regulator protein 1	CCAR1_HUMAN	291.427	878	8.18699
Q8IY67	RAVER1	Ribonucleoprotein PTB-binding 1	RAVR1_HUMAN	6882.92	972	12.7488				Q8IY67	RAVER1	Ribonucleoprotein PTB-binding 1	RAVR1_HUMAN	46.5596	1185	5.54101
Q8IY81	FTSJ3	pre-rRNA processing protein FTSJ3	SPB1_HUMAN	7329.43	948	12.8395				Q8IY81	FTSJ3	pre-rRNA processing protein FTSJ3	SPB1_HUMAN	167.401	1080	7.38717
Q8IZ83	ALDH16A1	Aldehyde dehydrogenase family 16 member A1	A16A1_HUMAN	7219.42	951	12.8177				Q8IZ83	ALDH16A1	Aldehyde dehydrogenase family 16 member A1	A16A1_HUMAN	219.136	992	7.77568
Q8N131	TMEM123	Porimin	PORIM_HUMAN	12972.3	666	13.6631				Q8N131	TMEM123	Porimin	PORIM_HUMAN	399.549	735	8.64223
Q8N163	CCAR2	Cell cycle and apoptosis regulator protein 2	CCAR2_HUMAN	6569.07	989	12.6815				Q8N163	CCAR2	Cell cycle and apoptosis regulator protein 2	CCAR2_HUMAN	184.196	1057	7.5251
Q8N684	CPSF7	Cleavage and polyadenylation specificity factor subunit 7	CPSF7_HUMAN	5464.29	1062	12.4158				Q8N684	CPSF7	Cleavage and polyadenylation specificity factor subunit 7	CPSF7_HUMAN	189.853	1050	7.56874
Q8N766	EMC1	ER membrane protein complex subunit 1	EMC1_HUMAN	4179.74	1128	12.0292				Q8N766	EMC1	ER membrane protein complex subunit 1	EMC1_HUMAN	326.163	828	8.34945
Q8NBJ7	SUMF2	Inactive C-alpha-formylglycine-generating enzyme 2	SUMF2_HUMAN	5571.45	1053	12.4438				Q8NBJ7	SUMF2	Inactive C-alpha-formylglycine-generating enzyme 2	SUMF2_HUMAN	131.046	1128	7.03393
Q8NBS9	TXNDC5	Thioredoxin domain-containing protein 5	TXND5_HUMAN	36407.3	258	15.1519				Q8NBS9	TXNDC5	Thioredoxin domain-containing protein 5	TXND5_HUMAN	1151.81	279	10.1697
Q8NC51	SERBP1	Plasminogen activator inhibitor 1 RNA-binding protein	PAIRB_HUMAN	51492.7	178	15.6521				Q8NC51	SERBP1	Plasminogen activator inhibitor 1 RNA-binding protein	PAIRB_HUMAN	2269.02	123	11.1479
Q8NE71	ABCF1	ATP-binding cassette sub-family F member 1	ABCF1_HUMAN	7512.28	938	12.875				Q8NE71	ABCF1	ATP-binding cassette sub-family F member 1	ABCF1_HUMAN	273.126	906	8.09342
Q8NEM2	SHCBP1	SHC SH2 domain-binding protein 1	SHCBP_HUMAN	32342.3	291	14.9811				Q8NEM2	SHCBP1	SHC SH2 domain-binding protein 1	SHCBP_HUMAN	2166.02	136	11.0808
Q8TAT6	NPLOC4	Nuclear protein localization protein 4 homolog	NPL4_HUMAN	7547.19	931	12.8817				Q8TAT6	NPLOC4	Nuclear protein localization protein 4 homolog	NPL4_HUMAN	245.693	952	7.94071
Q8TC12	RDH11	Retinol dehydrogenase 11	RDH11_HUMAN	4956.73	1092	12.2752				Q8TC12	RDH11	Retinol dehydrogenase 11	RDH11_HUMAN	411.169	726	8.68359
Q8TCT9	HM13	Minor histocompatibility antigen H13	HM13_HUMAN	6130.68	1011	12.5818				Q8TCT9	HM13	Minor histocompatibility antigen H13	HM13_HUMAN	410.015	728	8.67953
Q8TDX7	NEK7	Serine/threonine-protein kinase Nek7	NEK7_HUMAN	11945.4	716	13.5442				Q8TDX7	NEK7	Serine/threonine-protein kinase Nek7	NEK7_HUMAN	565.365	560	9.14304
Q8TEQ6	GEMIN5	Gem-associated protein 5	GEMI5_HUMAN	5335.03	1066	12.3813				Q8TEQ6	GEMIN5	Gem-associated protein 5	GEMI5_HUMAN	100.952	1163	6.65753
Q8WUF5	PPP1R13L	RelA-associated inhibitor	IASPP_HUMAN	1783.27	1182	10.8003				Q8WUF5	PPP1R13L	RelA-associated inhibitor	IASPP_HUMAN	163.894	1086	7.35662
Q8WUH6	TMEM263	Transmembrane protein 263	TM263_HUMAN	10301.1	792	13.3305				Q8WUH6	TMEM263	Transmembrane protein 263	TM263_HUMAN	398.002	737	8.63663
Q8WUM4	PDCD6IP	Programmed cell death 6-interacting protein	PDC6I_HUMAN	20187.2	449	14.3012				Q8WUM4	PDCD6IP	Programmed cell death 6-interacting protein	PDC6I_HUMAN	946.817	339	9.88694
Q8WVJ2	NUDCD2	NudC domain-containing protein 2	NUDC2_HUMAN	9523.14	818	13.2172				Q8WVJ2	NUDCD2	NudC domain-containing protein 2	NUDC2_HUMAN	202.411	1025	7.66114
Q8WW12	PCNP	PEST proteolytic signal-containing nuclear protein	PCNP_HUMAN	9553.04	817	13.2217				Q8WW12	PCNP	PEST proteolytic signal-containing nuclear protein	PCNP_HUMAN	353.879	788	8.46711
Q8WWI1	LMO7	LIM domain only protein 7	LMO7_HUMAN	2940.48	1162	11.5218				Q8WWI1	LMO7	LIM domain only protein 7	LMO7_HUMAN	307.189	852	8.26298
Q8WWM7	ATXN2L	Ataxin-2-like protein	ATX2L_HUMAN	9185.1	837	13.1651				Q8WWM7	ATXN2L	Ataxin-2-like protein	ATX2L_HUMAN	191.292	1045	7.57963
Q8WX93	PALLD	Palladin	PALLD_HUMAN	7513.81	937	12.8753				Q8WX93	PALLD	Palladin	PALLD_HUMAN	267.009	919	8.06074
Q8WXF1	PSPC1	Paraspeckle component 1	PSPC1_HUMAN	12894.7	671	13.6545				Q8WXF1	PSPC1	Paraspeckle component 1	PSPC1_HUMAN	535.788	589	9.06552
Q8WXX5	DNAJC9	DnaJ homolog subfamily C member 9	DNJC9_HUMAN	8903.05	849	13.1201				Q8WXX5	DNAJC9	DnaJ homolog subfamily C member 9	DNJC9_HUMAN	210.448	1005	7.71732
Q92499	DDX1	ATP-dependent RNA helicase DDX1	DDX1_HUMAN	11211.7	747	13.4527				Q92499	DDX1	ATP-dependent RNA helicase DDX1	DDX1_HUMAN	608.632	522	9.24943
Q92572	AP3S1	AP-3 complex subunit sigma-1	AP3S1_HUMAN	4107.11	1132	12.0039				Q92572	AP3S1	AP-3 complex subunit sigma-1	AP3S1_HUMAN	123.194	1143	6.94479
Q92597	NDRG1	Protein NDRG1	NDRG1_HUMAN	3079.18	1158	11.5883				Q92597	NDRG1	Protein NDRG1	NDRG1_HUMAN	300.637	867	8.23188
Q92598	HSPH1	Heat shock protein 105 kDa	HS105_HUMAN	42324.8	228	15.3692				Q92598	HSPH1	Heat shock protein 105 kDa	HS105_HUMAN	1390.99	226	10.4419
Q92616	GCN1	eIF-2-alpha kinase activator GCN1	GCN1_HUMAN	11440.9	739	13.4819				Q92616	GCN1	eIF-2-alpha kinase activator GCN1	GCN1_HUMAN	388.143	748	8.60045
Q92686	NRGN	Neurogranin	NEUG_HUMAN	5792.7	1038	12.5				Q92686	NRGN	Neurogranin	NEUG_HUMAN	306.672	855	8.26055
Q92688	ANP32B	Acidic leucine-rich nuclear phosphoprotein 32 family member B	AN32B_HUMAN	40374.6	237	15.3012				Q92688	ANP32B	Acidic leucine-rich nuclear phosphoprotein 32 family member B	AN32B_HUMAN	1506.21	205	10.5567
Q92734	TFG	Protein TFG	TFG_HUMAN	29419.6	323	14.8445				Q92734	TFG	Protein TFG	TFG_HUMAN	1028.47	314	10.0063
Q92747	ARPC1A	Actin-related protein 2/3 complex subunit 1A	ARC1A_HUMAN	14608.7	598	13.8345				Q92747	ARPC1A	Actin-related protein 2/3 complex subunit 1A	ARC1A_HUMAN	184.842	1053	7.53015
Q92804	TAF15	TATA-binding protein-associated factor 2N	RBP56_HUMAN	36761.3	253	15.1659				Q92804	TAF15	TATA-binding protein-associated factor 2N	RBP56_HUMAN	2870.33	92	11.487
Q92841	DDX17	Probable ATP-dependent RNA helicase DDX17	DDX17_HUMAN	89774.6	88	16.454				Q92841	DDX17	Probable ATP-dependent RNA helicase DDX17	DDX17_HUMAN	1886.69	156	10.8816
Q92890	UFD1	Ubiquitin recognition factor in ER-associated degradation protein 1	UFD1_HUMAN	12558	691	13.6163				Q92890	UFD1	Ubiquitin recognition factor in ER-associated degradation protein 1	UFD1_HUMAN	555.63	568	9.11798
Q92900	UPF1	Regulator of nonsense transcripts 1	RENT1_HUMAN	15452.3	572	13.9155				Q92900	UPF1	Regulator of nonsense transcripts 1	RENT1_HUMAN	418.65	713	8.7096
Q92905	COPS5	COP9 signalosome complex subunit 5	CSN5_HUMAN	9244.23	833	13.1743				Q92905	COPS5	COP9 signalosome complex subunit 5	CSN5_HUMAN	268.916	914	8.07101
Q92945	KHSRP	Far upstream element-binding protein 2	FUBP2_HUMAN	49406	190	15.5924				Q92945	KHSRP	Far upstream element-binding protein 2	FUBP2_HUMAN	1471.56	211	10.5231
Q92973	TNPO1	Transportin-1	TNPO1_HUMAN	12293	703	13.5856				Q92973	TNPO1	Transportin-1	TNPO1_HUMAN	314.061	846	8.2949
Q92979	EMG1	Ribosomal RNA small subunit methyltransferase NEP1	NEP1_HUMAN	5503.98	1059	12.4263				Q92979	EMG1	Ribosomal RNA small subunit methyltransferase NEP1	NEP1_HUMAN	132.575	1125	7.05067
Q93052	LPP	Lipoma-preferred partner	LPP_HUMAN	3116.06	1157	11.6055				Q93052	LPP	Lipoma-preferred partner	LPP_HUMAN	91.9519	1168	6.52281
Q969G5	CAVIN3	Caveolae-associated protein 3	CAVN3_HUMAN	15116.3	579	13.8838				Q969G5	CAVIN3	Caveolae-associated protein 3	CAVN3_HUMAN	382.51	754	8.57936
Q969H8	MYDGF	Myeloid-derived growth factor	MYDGF_HUMAN	8372.66	880	13.0315				Q969H8	MYDGF	Myeloid-derived growth factor	MYDGF_HUMAN	858.376	371	9.74547
Q969T9	WBP2	WW domain-binding protein 2	WBP2_HUMAN	9462.99	823	13.2081				Q969T9	WBP2	WW domain-binding protein 2	WBP2_HUMAN	286.563	886	8.16271
Q96A72	MAGOHB	Protein mago nashi homolog 2	MGN2_HUMAN	20113	455	14.2958				Q96A72	MAGOHB	Protein mago nashi homolog 2	MGN2_HUMAN	570.218	553	9.15537
Q96AC1	FERMT2	Fermitin family homolog 2	FERM2_HUMAN	221876	30	17.7594				Q96AC1	FERMT2	Fermitin family homolog 2	FERM2_HUMAN	11706.7	21	13.515
Q96AE4	FUBP1	Far upstream element-binding protein 1	FUBP1_HUMAN	14514.8	602	13.8252				Q96AE4	FUBP1	Far upstream element-binding protein 1	FUBP1_HUMAN	319.03	837	8.31755
Q96AG4	LRRC59	Leucine-rich repeat-containing protein 59	LRC59_HUMAN	30026.6	320	14.874				Q96AG4	LRRC59	Leucine-rich repeat-containing protein 59	LRC59_HUMAN	1085.57	295	10.0842
Q96AP7	ESAM	Endothelial cell-selective adhesion molecule	ESAM_HUMAN	4126.59	1129	12.0107				Q96AP7	ESAM	Endothelial cell-selective adhesion molecule	ESAM_HUMAN	332.93	816	8.37907
Q96B97	SH3KBP1	SH3 domain-containing kinase-binding protein 1	SH3K1_HUMAN	9321.08	828	13.1863				Q96B97	SH3KBP1	SH3 domain-containing kinase-binding protein 1	SH3K1_HUMAN	195.276	1038	7.60937
Q96C19	EFHD2	EF-hand domain-containing protein D2	EFHD2_HUMAN	12266.7	706	13.5825				Q96C19	EFHD2	EF-hand domain-containing protein D2	EFHD2_HUMAN	603.582	532	9.23741
Q96C86	DCPS	m7GpppX diphosphatase	DCPS_HUMAN	4211.22	1126	12.04				Q96C86	DCPS	m7GpppX diphosphatase	DCPS_HUMAN	159.407	1090	7.31657
Q96CT7	CCDC124	Coiled-coil domain-containing protein 124	CC124_HUMAN	12277.7	705	13.5838				Q96CT7	CCDC124	Coiled-coil domain-containing protein 124	CC124_HUMAN	753.598	418	9.55765
Q96CW1	AP2M1	AP-2 complex subunit mu	AP2M1_HUMAN	20778.9	438	14.3428				Q96CW1	AP2M1	AP-2 complex subunit mu	AP2M1_HUMAN	539.615	584	9.07579
Q96DI7	SNRNP40	U5 small nuclear ribonucleoprotein 40 kDa protein	SNR40_HUMAN	6276.84	1000	12.6158				Q96DI7	SNRNP40	U5 small nuclear ribonucleoprotein 40 kDa protein	SNR40_HUMAN	103.125	1161	6.68825
Q96G03	PGM2	Phosphoglucomutase-2	PGM2_HUMAN	8229.32	889	13.0066				Q96G03	PGM2	Phosphoglucomutase-2	PGM2_HUMAN	652.193	486	9.34916
Q96HC4	PDLIM5	PDZ and LIM domain protein 5	PDLI5_HUMAN	6595.13	986	12.6872				Q96HC4	PDLIM5	PDZ and LIM domain protein 5	PDLI5_HUMAN	422.512	711	8.72285
Q96HS1	PGAM5	Serine/threonine-protein phosphatase PGAM5, mitochondrial	PGAM5_HUMAN	8154.24	895	12.9933				Q96HS1	PGAM5	Serine/threonine-protein phosphatase PGAM5, mitochondrial	PGAM5_HUMAN	309.079	849	8.27183
Q96I24	FUBP3	Far upstream element-binding protein 3	FUBP3_HUMAN	5711.37	1047	12.4796				Q96I24	FUBP3	Far upstream element-binding protein 3	FUBP3_HUMAN	475.25	644	8.89254
Q96I25	RBM17	Splicing factor 45	SPF45_HUMAN	3758.62	1139	11.876				Q96I25	RBM17	Splicing factor 45	SPF45_HUMAN	223.248	988	7.8025
Q96IZ0	PAWR	PRKC apoptosis WT1 regulator protein	PAWR_HUMAN	10885.1	763	13.4101				Q96IZ0	PAWR	PRKC apoptosis WT1 regulator protein	PAWR_HUMAN	238.525	963	7.898
Q96K17	BTF3L4	Transcription factor BTF3 homolog 4	BT3L4_HUMAN	12797.9	677	13.6436				Q96K17	BTF3L4	Transcription factor BTF3 homolog 4	BT3L4_HUMAN	677.961	464	9.40506
Q96KB5	PBK	Lymphokine-activated killer T-cell-originated protein kinase	TOPK_HUMAN	5895.98	1030	12.5255				Q96KB5	PBK	Lymphokine-activated killer T-cell-originated protein kinase	TOPK_HUMAN	133.915	1123	7.06518
Q96KP4	CNDP2	Cytosolic non-specific dipeptidase	CNDP2_HUMAN	10311.3	791	13.3319				Q96KP4	CNDP2	Cytosolic non-specific dipeptidase	CNDP2_HUMAN	734.062	427	9.51976
Q96ME1	FBXL18	F-box/LRR-repeat protein 18	FXL18_HUMAN	19233.9	475	14.2314				Q96ME1	FBXL18	F-box/LRR-repeat protein 18	FXL18_HUMAN	778.01	404	9.60364
Q96P48	ARAP1	Arf-GAP with Rho-GAP domain, ANK repeat and PH domain-containing protein 1	ARAP1_HUMAN	2853.65	1165	11.4786				Q96P48	ARAP1	Arf-GAP with Rho-GAP domain, ANK repeat and PH domain-containing protein 1	ARAP1_HUMAN	197.414	1035	7.62508
Q96PK6	RBM14	RNA-binding protein 14	RBM14_HUMAN	9220.44	835	13.1706				Q96PK6	RBM14	RNA-binding protein 14	RBM14_HUMAN	381.015	757	8.57371
Q96QK1	VPS35	Vacuolar protein sorting-associated protein 35	VPS35_HUMAN	14485.2	606	13.8223				Q96QK1	VPS35	Vacuolar protein sorting-associated protein 35	VPS35_HUMAN	440.464	688	8.78288
Q96RE7	NACC1	Nucleus accumbens-associated protein 1	NACC1_HUMAN	24075.7	374	14.5553				Q96RE7	NACC1	Nucleus accumbens-associated protein 1	NACC1_HUMAN	3759.09	69	11.8762
Q96RS6	NUDCD1	NudC domain-containing protein 1	NUDC1_HUMAN	20989.2	433	14.3574				Q96RS6	NUDCD1	NudC domain-containing protein 1	NUDC1_HUMAN	230.361	978	7.84776
Q96SB4	SRPK1	SRSF protein kinase 1	SRPK1_HUMAN	6126.05	1012	12.5807				Q96SB4	SRPK1	SRSF protein kinase 1	SRPK1_HUMAN	134.018	1122	7.06629
Q96T76	MMS19	MMS19 nucleotide excision repair protein homolog	MMS19_HUMAN	8476.59	870	13.0493				Q96T76	MMS19	MMS19 nucleotide excision repair protein homolog	MMS19_HUMAN	389.546	745	8.60565
Q96T88	UHRF1	E3 ubiquitin-protein ligase UHRF1	UHRF1_HUMAN	4987.66	1091	12.2841				Q96T88	UHRF1	E3 ubiquitin-protein ligase UHRF1	UHRF1_HUMAN	270.87	909	8.08145
Q96TA1	FAM129B	Niban-like protein 1	NIBL1_HUMAN	17634.8	520	14.1061				Q96TA1	FAM129B	Niban-like protein 1	NIBL1_HUMAN	710.072	447	9.47182
Q99426	TBCB	Tubulin-folding cofactor B	TBCB_HUMAN	16326.2	548	13.9949				Q99426	TBCB	Tubulin-folding cofactor B	TBCB_HUMAN	634.282	499	9.30898
Q99436	PSMB7	Proteasome subunit beta type-7	PSB7_HUMAN	20812.6	437	14.3452				Q99436	PSMB7	Proteasome subunit beta type-7	PSB7_HUMAN	570.961	552	9.15725
Q99439	CNN2	Calponin-2	CNN2_HUMAN	38245.7	246	15.223				Q99439	CNN2	Calponin-2	CNN2_HUMAN	1124.53	287	10.1351
Q99459	CDC5L	Cell division cycle 5-like protein	CDC5L_HUMAN	5774.71	1041	12.4955				Q99459	CDC5L	Cell division cycle 5-like protein	CDC5L_HUMAN	507.538	622	8.98737
Q99460	PSMD1	26S proteasome non-ATPase regulatory subunit 1	PSMD1_HUMAN	12315.6	702	13.5882				Q99460	PSMD1	26S proteasome non-ATPase regulatory subunit 1	PSMD1_HUMAN	396.302	741	8.63046
Q99471	PFDN5	Prefoldin subunit 5	PFD5_HUMAN	7186.86	954	12.8111				Q99471	PFDN5	Prefoldin subunit 5	PFD5_HUMAN	239.419	961	7.9034
Q99497	PARK7	Protein/nucleic acid deglycase DJ-1	PARK7_HUMAN	70730.1	122	16.11				Q99497	PARK7	Protein/nucleic acid deglycase DJ-1	PARK7_HUMAN	1402.01	222	10.4533
Q99536	VAT1	Synaptic vesicle membrane protein VAT-1 homolog	VAT1_HUMAN	3700.87	1140	11.8536				Q99536	VAT1	Synaptic vesicle membrane protein VAT-1 homolog	VAT1_HUMAN	1822.2	164	10.8315
Q99584	S100A13	Protein S100-A13	S10AD_HUMAN	18085.2	511	14.1425				Q99584	S100A13	Protein S100-A13	S10AD_HUMAN	729.854	429	9.51146
Q99614	TTC1	Tetratricopeptide repeat protein 1	TTC1_HUMAN	7107.02	962	12.795				Q99614	TTC1	Tetratricopeptide repeat protein 1	TTC1_HUMAN	190.051	1048	7.57024
Q99615	DNAJC7	DnaJ homolog subfamily C member 7	DNJC7_HUMAN	13626.3	639	13.7341				Q99615	DNAJC7	DnaJ homolog subfamily C member 7	DNJC7_HUMAN	478.814	640	8.90332
Q99623	PHB2	Prohibitin-2	PHB2_HUMAN	52094.7	174	15.6688				Q99623	PHB2	Prohibitin-2	PHB2_HUMAN	1458.94	214	10.5107
Q99729	HNRNPAB	Heterogeneous nuclear ribonucleoprotein A/B	ROAA_HUMAN	10842.1	765	13.4044				Q99729	HNRNPAB	Heterogeneous nuclear ribonucleoprotein A/B	ROAA_HUMAN	208.697	1009	7.70527
Q99733	NAP1L4	Nucleosome assembly protein 1-like 4	NP1L4_HUMAN	12662.8	686	13.6283				Q99733	NAP1L4	Nucleosome assembly protein 1-like 4	NP1L4_HUMAN	698.354	454	9.44781
Q99747	NAPG	Gamma-soluble NSF attachment protein	SNAG_HUMAN	5879.04	1031	12.5214				Q99747	NAPG	Gamma-soluble NSF attachment protein	SNAG_HUMAN	146.466	1108	7.19442
Q99798	ACO2	Aconitate hydratase, mitochondrial	ACON_HUMAN	7529	934	12.8782				Q99798	ACO2	Aconitate hydratase, mitochondrial	ACON_HUMAN	131.39	1127	7.03771
Q99829	CPNE1	Copine-1	CPNE1_HUMAN	17119.6	531	14.0634				Q99829	CPNE1	Copine-1	CPNE1_HUMAN	845.8	377	9.72417
Q99832	CCT7	T-complex protein 1 subunit eta	TCPH_HUMAN	48465.6	193	15.5647				Q99832	CCT7	T-complex protein 1 subunit eta	TCPH_HUMAN	1666.85	184	10.7029
Q99848	EBNA1BP2	Probable rRNA-processing protein EBP2	EBP2_HUMAN	5028.53	1087	12.2959				Q99848	EBNA1BP2	Probable rRNA-processing protein EBP2	EBP2_HUMAN	233.887	969	7.86967
Q99873	PRMT1	Protein arginine N-methyltransferase 1	ANM1_HUMAN	12912.3	670	13.6565				Q99873	PRMT1	Protein arginine N-methyltransferase 1	ANM1_HUMAN	583.213	544	9.18788
Q99961	SH3GL1	Endophilin-A2	SH3G1_HUMAN	10612.4	776	13.3735				Q99961	SH3GL1	Endophilin-A2	SH3G1_HUMAN	565.363	561	9.14303
Q99986	VRK1	Serine/threonine-protein kinase VRK1	VRK1_HUMAN	5472.88	1060	12.4181				Q99986	VRK1	Serine/threonine-protein kinase VRK1	VRK1_HUMAN	140.331	1120	7.13269
Q9BPX3	NCAPG	Condensin complex subunit 3	CND3_HUMAN	10665.2	771	13.3806				Q9BPX3	NCAPG	Condensin complex subunit 3	CND3_HUMAN	411.716	725	8.68551
Q9BQ39	DDX50	ATP-dependent RNA helicase DDX50	DDX50_HUMAN	5997.33	1020	12.5501				Q9BQ39	DDX50	ATP-dependent RNA helicase DDX50	DDX50_HUMAN	240.229	960	7.90826
Q9BQ61	TRIR	Telomerase RNA component interacting RNase	TRIR_HUMAN	10524.4	782	13.3614				Q9BQ61	TRIR	Telomerase RNA component interacting RNase	TRIR_HUMAN	257.645	929	8.00924
Q9BQ67	GRWD1	Glutamate-rich WD repeat-containing protein 1	GRWD1_HUMAN	4401.82	1117	12.1039				Q9BQ67	GRWD1	Glutamate-rich WD repeat-containing protein 1	GRWD1_HUMAN	150.021	1100	7.22902
Q9BQA1	WDR77	Methylosome protein 50	MEP50_HUMAN	23354.2	384	14.5114				Q9BQA1	WDR77	Methylosome protein 50	MEP50_HUMAN	416.103	720	8.7008
Q9BQG0	MYBBP1A	Myb-binding protein 1A	MBB1A_HUMAN	7892.57	908	12.9463				Q9BQG0	MYBBP1A	Myb-binding protein 1A	MBB1A_HUMAN	1694.28	182	10.7265
Q9BR76	CORO1B	Coronin-1B	COR1B_HUMAN	14506.6	603	13.8244				Q9BR76	CORO1B	Coronin-1B	COR1B_HUMAN	473.285	652	8.88657
Q9BRA2	TXNDC17	Thioredoxin domain-containing protein 17	TXD17_HUMAN	19534.2	464	14.2537				Q9BRA2	TXNDC17	Thioredoxin domain-containing protein 17	TXD17_HUMAN	687.7	459	9.42564
Q9BSJ8	ESYT1	Extended synaptotagmin-1	ESYT1_HUMAN	13231	657	13.6916				Q9BSJ8	ESYT1	Extended synaptotagmin-1	ESYT1_HUMAN	518.638	606	9.01859
Q9BTE3	MCMBP	Mini-chromosome maintenance complex-binding protein	MCMBP_HUMAN	4592.81	1110	12.1652				Q9BTE3	MCMBP	Mini-chromosome maintenance complex-binding protein	MCMBP_HUMAN	116.25	1151	6.86109
Q9BUF5	TUBB6	Tubulin beta-6 chain	TBB6_HUMAN	17301	528	14.0786				Q9BUF5	TUBB6	Tubulin beta-6 chain	TBB6_HUMAN	3215.86	80	11.651
Q9BUL8	PDCD10	Programmed cell death protein 10	PDC10_HUMAN	11456.7	738	13.4839				Q9BUL8	PDCD10	Programmed cell death protein 10	PDC10_HUMAN	442.828	684	8.7906
Q9BUQ8	DDX23	Probable ATP-dependent RNA helicase DDX23	DDX23_HUMAN	7776.66	915	12.9249				Q9BUQ8	DDX23	Probable ATP-dependent RNA helicase DDX23	DDX23_HUMAN	304.841	858	8.25191
Q9BV40	VAMP8	Vesicle-associated membrane protein 8	VAMP8_HUMAN	12653.5	687	13.6272				Q9BV40	VAMP8	Vesicle-associated membrane protein 8	VAMP8_HUMAN	225.867	984	7.81933
Q9BWD1	ACAT2	Acetyl-CoA acetyltransferase, cytosolic	THIC_HUMAN	13923.9	626	13.7653				Q9BWD1	ACAT2	Acetyl-CoA acetyltransferase, cytosolic	THIC_HUMAN	607.539	524	9.24683
Q9BXJ9	NAA15	N-alpha-acetyltransferase 15, NatA auxiliary subunit	NAA15_HUMAN	19660.5	460	14.263				Q9BXJ9	NAA15	N-alpha-acetyltransferase 15, NatA auxiliary subunit	NAA15_HUMAN	435.633	693	8.76697
Q9BXP5	SRRT	Serrate RNA effector molecule homolog	SRRT_HUMAN	8058.21	900	12.9762				Q9BXP5	SRRT	Serrate RNA effector molecule homolog	SRRT_HUMAN	324.634	829	8.34267
Q9BXS5	AP1M1	AP-1 complex subunit mu-1	AP1M1_HUMAN	12625.5	688	13.6241				Q9BXS5	AP1M1	AP-1 complex subunit mu-1	AP1M1_HUMAN	604.135	531	9.23873
Q9BY32	ITPA	Inosine triphosphate pyrophosphatase	ITPA_HUMAN	11326.9	743	13.4675				Q9BY32	ITPA	Inosine triphosphate pyrophosphatase	ITPA_HUMAN	475.296	643	8.89268
Q9BY44	EIF2A	Eukaryotic translation initiation factor 2A	EIF2A_HUMAN	23156.3	389	14.4991				Q9BY44	EIF2A	Eukaryotic translation initiation factor 2A	EIF2A_HUMAN	252.341	943	7.97923
Q9BZE4	GTPBP4	Nucleolar GTP-binding protein 1	NOG1_HUMAN	6889.81	971	12.7502				Q9BZE4	GTPBP4	Nucleolar GTP-binding protein 1	NOG1_HUMAN	83.4877	1174	6.38349
Q9BZL1	UBL5	Ubiquitin-like protein 5	UBL5_HUMAN	1792.19	1181	10.8075				Q9BZL1	UBL5	Ubiquitin-like protein 5	UBL5_HUMAN	63.1121	1182	5.97984
Q9BZZ5	API5	Apoptosis inhibitor 5	API5_HUMAN	12970	667	13.6629				Q9BZZ5	API5	Apoptosis inhibitor 5	API5_HUMAN	461.937	662	8.85155
Q9C005	DPY30	Protein dpy-30 homolog	DPY30_HUMAN	13951.5	622	13.7681				Q9C005	DPY30	Protein dpy-30 homolog	DPY30_HUMAN	228.578	980	7.83654
Q9GZZ1	NAA50	N-alpha-acetyltransferase 50	NAA50_HUMAN	10929	759	13.4159				Q9GZZ1	NAA50	N-alpha-acetyltransferase 50	NAA50_HUMAN	341.549	804	8.41595
Q9H0B6	KLC2	Kinesin light chain 2	KLC2_HUMAN	14389.6	611	13.8127				Q9H0B6	KLC2	Kinesin light chain 2	KLC2_HUMAN	468.866	656	8.87303
Q9H0D6	XRN2	5'-3' exoribonuclease 2	XRN2_HUMAN	13202.9	660	13.6886				Q9H0D6	XRN2	5'-3' exoribonuclease 2	XRN2_HUMAN	509.054	617	8.99167
Q9H0H5	RACGAP1	Rac GTPase-activating protein 1	RGAP1_HUMAN	15097.5	580	13.882				Q9H0H5	RACGAP1	Rac GTPase-activating protein 1	RGAP1_HUMAN	355.562	784	8.47396
Q9H1E3	NUCKS1	Nuclear ubiquitous casein and cyclin-dependent kinase substrate 1	NUCKS_HUMAN	10963.1	757	13.4204				Q9H1E3	NUCKS1	Nuclear ubiquitous casein and cyclin-dependent kinase substrate 1	NUCKS_HUMAN	309.242	848	8.27259
Q9H299	SH3BGRL3	SH3 domain-binding glutamic acid-rich-like protein 3	SH3L3_HUMAN	118014	68	16.8486				Q9H299	SH3BGRL3	SH3 domain-binding glutamic acid-rich-like protein 3	SH3L3_HUMAN	2989.99	89	11.5459
Q9H2D6	TRIOBP	TRIO and F-actin-binding protein	TARA_HUMAN	5549.29	1055	12.4381				Q9H2D6	TRIOBP	TRIO and F-actin-binding protein	TARA_HUMAN	118.011	1149	6.88278
Q9H2G2	SLK	STE20-like serine/threonine-protein kinase	SLK_HUMAN	5853.61	1034	12.5151				Q9H2G2	SLK	STE20-like serine/threonine-protein kinase	SLK_HUMAN	173.454	1073	7.43841
Q9H2M9	RAB3GAP2	Rab3 GTPase-activating protein non-catalytic subunit	RBGPR_HUMAN	5867.88	1032	12.5186				Q9H2M9	RAB3GAP2	Rab3 GTPase-activating protein non-catalytic subunit	RBGPR_HUMAN	177.644	1064	7.47284
Q9H2U2	PPA2	Inorganic pyrophosphatase 2, mitochondrial	IPYR2_HUMAN	4662.84	1106	12.187				Q9H2U2	PPA2	Inorganic pyrophosphatase 2, mitochondrial	IPYR2_HUMAN	434.639	696	8.76367
Q9H3N1	TMX1	Thioredoxin-related transmembrane protein 1	TMX1_HUMAN	26063.2	358	14.6697				Q9H3N1	TMX1	Thioredoxin-related transmembrane protein 1	TMX1_HUMAN	885.043	359	9.7896
Q9H3U1	UNC45A	Protein unc-45 homolog A	UN45A_HUMAN	3960.42	1135	11.9514				Q9H3U1	UNC45A	Protein unc-45 homolog A	UN45A_HUMAN	147.308	1106	7.20269
Q9H444	CHMP4B	Charged multivesicular body protein 4b	CHM4B_HUMAN	11844.9	718	13.532				Q9H444	CHMP4B	Charged multivesicular body protein 4b	CHM4B_HUMAN	462.667	661	8.85383
Q9H4M9	EHD1	EH domain-containing protein 1	EHD1_HUMAN	21319.7	428	14.3799				Q9H4M9	EHD1	EH domain-containing protein 1	EHD1_HUMAN	1180.06	271	10.2046
Q9H6S3	EPS8L2	Epidermal growth factor receptor kinase substrate 8-like protein 2	ES8L2_HUMAN	14487.7	605	13.8225				Q9H6S3	EPS8L2	Epidermal growth factor receptor kinase substrate 8-like protein 2	ES8L2_HUMAN	539.359	585	9.0751
Q9H6Z4	RANBP3	Ran-binding protein 3	RANB3_HUMAN	6555.75	990	12.6785				Q9H6Z4	RANBP3	Ran-binding protein 3	RANB3_HUMAN	364.137	772	8.50834
Q9H910	JPT2	Jupiter microtubule associated homolog 2	JUPI2_HUMAN	13019.2	664	13.6683				Q9H910	JPT2	Jupiter microtubule associated homolog 2	JUPI2_HUMAN	493.736	629	8.9476
Q9H9B4	SFXN1	Sideroflexin-1	SFXN1_HUMAN	9229.37	834	13.172				Q9H9B4	SFXN1	Sideroflexin-1	SFXN1_HUMAN	522.202	603	9.02846
Q9HAV4	XPO5	Exportin-5	XPO5_HUMAN	5073.43	1082	12.3087				Q9HAV4	XPO5	Exportin-5	XPO5_HUMAN	133.701	1124	7.06287
Q9HAV7	GRPEL1	GrpE protein homolog 1, mitochondrial	GRPE1_HUMAN	6931.39	969	12.7589				Q9HAV7	GRPEL1	GrpE protein homolog 1, mitochondrial	GRPE1_HUMAN	207.954	1013	7.70012
Q9HB07	C12orf10	UPF0160 protein MYG1, mitochondrial	MYG1_HUMAN	8371.2	881	13.0312				Q9HB07	C12orf10	UPF0160 protein MYG1, mitochondrial	MYG1_HUMAN	443.271	682	8.79205
Q9HB71	CACYBP	Calcyclin-binding protein	CYBP_HUMAN	35887.1	263	15.1312				Q9HB71	CACYBP	Calcyclin-binding protein	CYBP_HUMAN	727.782	432	9.50736
Q9HC38	GLOD4	Glyoxalase domain-containing protein 4	GLOD4_HUMAN	11561.5	728	13.497				Q9HC38	GLOD4	Glyoxalase domain-containing protein 4	GLOD4_HUMAN	569.581	555	9.15376
Q9HDC9	APMAP	Adipocyte plasma membrane-associated protein	APMAP_HUMAN	14370.4	613	13.8108				Q9HDC9	APMAP	Adipocyte plasma membrane-associated protein	APMAP_HUMAN	445.104	680	8.798
Q9NP72	RAB18	Ras-related protein Rab-18	RAB18_HUMAN	8761.38	857	13.0969				Q9NP72	RAB18	Ras-related protein Rab-18	RAB18_HUMAN	576.543	545	9.17128
Q9NP79	VTA1	Vacuolar protein sorting-associated protein VTA1 homolog	VTA1_HUMAN	5590.75	1052	12.4488				Q9NP79	VTA1	Vacuolar protein sorting-associated protein VTA1 homolog	VTA1_HUMAN	332.822	817	8.37861
Q9NPD8	UBE2T	Ubiquitin-conjugating enzyme E2 T	UBE2T_HUMAN	2692.36	1171	11.3947				Q9NPD8	UBE2T	Ubiquitin-conjugating enzyme E2 T	UBE2T_HUMAN	230.616	977	7.84935
Q9NQ29	LUC7L	Putative RNA-binding protein Luc7-like 1	LUC7L_HUMAN	6737.18	977	12.7179				Q9NQ29	LUC7L	Putative RNA-binding protein Luc7-like 1	LUC7L_HUMAN	232.435	971	7.86068
Q9NQC3	RTN4	Reticulon-4	RTN4_HUMAN	15913.1	558	13.9579				Q9NQC3	RTN4	Reticulon-4	RTN4_HUMAN	510.386	613	8.99545
Q9NQR4	NIT2	Omega-amidase NIT2	NIT2_HUMAN	7410.74	945	12.8554				Q9NQR4	NIT2	Omega-amidase NIT2	NIT2_HUMAN	345.755	799	8.43361
Q9NQW6	ANLN	Anillin	ANLN_HUMAN	6011.69	1018	12.5536				Q9NQW6	ANLN	Anillin	ANLN_HUMAN	215.889	1000	7.75415
Q9NR30	DDX21	Nucleolar RNA helicase 2	DDX21_HUMAN	29084.3	328	14.828				Q9NR30	DDX21	Nucleolar RNA helicase 2	DDX21_HUMAN	649.404	490	9.34297
Q9NR31	SAR1A	GTP-binding protein SAR1a	SAR1A_HUMAN	19570.4	462	14.2564				Q9NR31	SAR1A	GTP-binding protein SAR1a	SAR1A_HUMAN	662.276	480	9.37129
Q9NR45	NANS	Sialic acid synthase	SIAS_HUMAN	20535.5	442	14.3258				Q9NR45	NANS	Sialic acid synthase	SIAS_HUMAN	345.583	800	8.43289
Q9NRF9	POLE3	DNA polymerase epsilon subunit 3	DPOE3_HUMAN	9994.25	803	13.2869				Q9NRF9	POLE3	DNA polymerase epsilon subunit 3	DPOE3_HUMAN	389.664	744	8.60609
Q9NRN7	AASDHPPT	L-aminoadipate-semialdehyde dehydrogenase-phosphopantetheinyl transferase	ADPPT_HUMAN	11698	725	13.514				Q9NRN7	AASDHPPT	L-aminoadipate-semialdehyde dehydrogenase-phosphopantetheinyl transferase	ADPPT_HUMAN	332.417	821	8.37685
Q9NRV9	HEBP1	Heme-binding protein 1	HEBP1_HUMAN	17426.5	524	14.089				Q9NRV9	HEBP1	Heme-binding protein 1	HEBP1_HUMAN	437.798	690	8.77412
Q9NS25	SPANXB1	Sperm protein associated with the nucleus on the X chromosome B1	SPNXB_HUMAN	32914.4	286	15.0064				Q9NS25	SPANXB1	Sperm protein associated with the nucleus on the X chromosome B1	SPNXB_HUMAN	534.065	590	9.06087
Q9NSD9	FARSB	Phenylalanine--tRNA ligase beta subunit	SYFB_HUMAN	9404.16	826	13.1991				Q9NSD9	FARSB	Phenylalanine--tRNA ligase beta subunit	SYFB_HUMAN	551.53	572	9.1073
Q9NTJ3	SMC4	Structural maintenance of chromosomes protein 4	SMC4_HUMAN	11021.8	754	13.4281				Q9NTJ3	SMC4	Structural maintenance of chromosomes protein 4	SMC4_HUMAN	493.466	630	8.94681
Q9NTK5	OLA1	Obg-like ATPase 1	OLA1_HUMAN	27616.3	340	14.7532				Q9NTK5	OLA1	Obg-like ATPase 1	OLA1_HUMAN	878.343	364	9.77864
Q9NUQ6	SPATS2L	SPATS2-like protein	SPS2L_HUMAN	9596.05	813	13.2282				Q9NUQ6	SPATS2L	SPATS2-like protein	SPS2L_HUMAN	146.857	1107	7.19827
Q9NVA2	2021-09-11	Septin-11	SEP11_HUMAN	9660.32	808	13.2379				Q9NVA2	2021-09-11	Septin-11	SEP11_HUMAN	359.765	778	8.49091
Q9NVD7	PARVA	Alpha-parvin	PARVA_HUMAN	6731.18	979	12.7166				Q9NVD7	PARVA	Alpha-parvin	PARVA_HUMAN	218.689	995	7.77274
Q9NWB6	ARGLU1	Arginine and glutamate-rich protein 1	ARGL1_HUMAN	13347.3	649	13.7043				Q9NWB6	ARGLU1	Arginine and glutamate-rich protein 1	ARGL1_HUMAN	142.174	1115	7.15152
Q9NWV4	CZIB	CXXC motif containing zinc binding protein	CZIB_HUMAN	9622.58	811	13.2322				Q9NWV4	CZIB	CXXC motif containing zinc binding protein	CZIB_HUMAN	330.257	823	8.36745
Q9NX63	CHCHD3	MICOS complex subunit MIC19	MIC19_HUMAN	14067.3	621	13.7801				Q9NX63	CHCHD3	MICOS complex subunit MIC19	MIC19_HUMAN	332.576	819	8.37754
Q9NY12	GAR1	H/ACA ribonucleoprotein complex subunit 1	GAR1_HUMAN	5899.49	1029	12.5264				Q9NY12	GAR1	H/ACA ribonucleoprotein complex subunit 1	GAR1_HUMAN	191.14	1046	7.57848
Q9NY33	DPP3	Dipeptidyl peptidase 3	DPP3_HUMAN	5976.2	1023	12.545				Q9NY33	DPP3	Dipeptidyl peptidase 3	DPP3_HUMAN	153.848	1097	7.26536
Q9NYF8	BCLAF1	Bcl-2-associated transcription factor 1	BCLF1_HUMAN	5246.8	1070	12.3572				Q9NYF8	BCLAF1	Bcl-2-associated transcription factor 1	BCLF1_HUMAN	176.837	1066	7.46628
Q9NYL9	TMOD3	Tropomodulin-3	TMOD3_HUMAN	9044.83	844	13.1429				Q9NYL9	TMOD3	Tropomodulin-3	TMOD3_HUMAN	417.527	716	8.70572
Q9NZB2	FAM120A	Constitutive coactivator of PPAR-gamma-like protein 1	F120A_HUMAN	11138.2	751	13.4432				Q9NZB2	FAM120A	Constitutive coactivator of PPAR-gamma-like protein 1	F120A_HUMAN	583.785	543	9.18929
Q9NZM1	MYOF	Myoferlin	MYOF_HUMAN	16600.8	545	14.019				Q9NZM1	MYOF	Myoferlin	MYOF_HUMAN	874.666	367	9.77259
Q9NZN4	EHD2	EH domain-containing protein 2	EHD2_HUMAN	10153.2	796	13.3096				Q9NZN4	EHD2	EH domain-containing protein 2	EHD2_HUMAN	228.094	982	7.83348
Q9P0K7	RAI14	Ankycorbin	RAI14_HUMAN	17722.2	518	14.1133				Q9P0K7	RAI14	Ankycorbin	RAI14_HUMAN	807.056	390	9.65653
Q9P0L0	VAPA	Vesicle-associated membrane protein-associated protein A	VAPA_HUMAN	20007.5	457	14.2883				Q9P0L0	VAPA	Vesicle-associated membrane protein-associated protein A	VAPA_HUMAN	169.704	1078	7.40688
Q9P258	RCC2	Protein RCC2	RCC2_HUMAN	6341.33	998	12.6306				Q9P258	RCC2	Protein RCC2	RCC2_HUMAN	204.648	1023	7.677
Q9P2E9	RRBP1	Ribosome-binding protein 1	RRBP1_HUMAN	22502.6	400	14.4578				Q9P2E9	RRBP1	Ribosome-binding protein 1	RRBP1_HUMAN	473.462	650	8.8871
Q9P2J5	LARS	Leucine--tRNA ligase, cytoplasmic	SYLC_HUMAN	17192.4	529	14.0695				Q9P2J5	LARS	Leucine--tRNA ligase, cytoplasmic	SYLC_HUMAN	424.091	706	8.72823
Q9P2T1	GMPR2	GMP reductase 2	GMPR2_HUMAN	7536.28	933	12.8796				Q9P2T1	GMPR2	GMP reductase 2	GMPR2_HUMAN	308.911	850	8.27105
Q9UBE0	SAE1	SUMO-activating enzyme subunit 1	SAE1_HUMAN	8300.36	887	13.019				Q9UBE0	SAE1	SUMO-activating enzyme subunit 1	SAE1_HUMAN	276.835	898	8.11288
Q9UBI6	GNG12	Guanine nucleotide-binding protein G(I)/G(S)/G(O) subunit gamma-12	GBG12_HUMAN	5129.15	1075	12.3245				Q9UBI6	GNG12	Guanine nucleotide-binding protein G(I)/G(S)/G(O) subunit gamma-12	GBG12_HUMAN	192.939	1040	7.592
Q9UBM7	DHCR7	7-dehydrocholesterol reductase	DHCR7_HUMAN	4334.56	1122	12.0817				Q9UBM7	DHCR7	7-dehydrocholesterol reductase	DHCR7_HUMAN	124.935	1138	6.96503
Q9UBQ0	VPS29	Vacuolar protein sorting-associated protein 29	VPS29_HUMAN	8000.91	902	12.9659				Q9UBQ0	VPS29	Vacuolar protein sorting-associated protein 29	VPS29_HUMAN	589.291	538	9.20284
Q9UBT2	UBA2	SUMO-activating enzyme subunit 2	SAE2_HUMAN	8726.79	858	13.0912				Q9UBT2	UBA2	SUMO-activating enzyme subunit 2	SAE2_HUMAN	287.034	883	8.16508
Q9UDY2	TJP2	Tight junction protein ZO-2	ZO2_HUMAN	17420.3	525	14.0885				Q9UDY2	TJP2	Tight junction protein ZO-2	ZO2_HUMAN	522.309	602	9.02876
Q9UG63	ABCF2	ATP-binding cassette sub-family F member 2	ABCF2_HUMAN	8553.44	864	13.0623				Q9UG63	ABCF2	ATP-binding cassette sub-family F member 2	ABCF2_HUMAN	650.177	488	9.34469
Q9UGI8	TES	Testin	TES_HUMAN	9563.78	816	13.2234				Q9UGI8	TES	Testin	TES_HUMAN	175.706	1069	7.45702
Q9UH65	SWAP70	Switch-associated protein 70	SWP70_HUMAN	3181.76	1154	11.6356				Q9UH65	SWAP70	Switch-associated protein 70	SWP70_HUMAN	211.567	1003	7.72497
Q9UHB6	LIMA1	LIM domain and actin-binding protein 1	LIMA1_HUMAN	11056.9	753	13.4327				Q9UHB6	LIMA1	LIM domain and actin-binding protein 1	LIMA1_HUMAN	441.129	687	8.78506
Q9UHB9	SRP68	Signal recognition particle subunit SRP68	SRP68_HUMAN	12576	689	13.6184				Q9UHB9	SRP68	Signal recognition particle subunit SRP68	SRP68_HUMAN	727.926	431	9.50765
Q9UHD8	2021-09-09	Septin-9	SEPT9_HUMAN	23640	379	14.5289				Q9UHD8	2021-09-09	Septin-9	SEPT9_HUMAN	718.26	440	9.48836
Q9UHR5	SAP30BP	SAP30-binding protein	S30BP_HUMAN	3445.23	1148	11.7504				Q9UHR5	SAP30BP	SAP30-binding protein	S30BP_HUMAN	130.81	1131	7.03133
Q9UHV9	PFDN2	Prefoldin subunit 2	PFD2_HUMAN	19137.1	480	14.2241				Q9UHV9	PFDN2	Prefoldin subunit 2	PFD2_HUMAN	599.396	534	9.22737
Q9UHX1	PUF60	Poly(U)-binding-splicing factor PUF60	PUF60_HUMAN	7134.78	960	12.8007				Q9UHX1	PUF60	Poly(U)-binding-splicing factor PUF60	PUF60_HUMAN	271.738	907	8.08607
Q9UJZ1	STOML2	Stomatin-like protein 2, mitochondrial	STML2_HUMAN	13466.3	644	13.7171				Q9UJZ1	STOML2	Stomatin-like protein 2, mitochondrial	STML2_HUMAN	336.227	809	8.39329
Q9UK45	LSM7	U6 snRNA-associated Sm-like protein LSm7	LSM7_HUMAN	22204.7	404	14.4386				Q9UK45	LSM7	U6 snRNA-associated Sm-like protein LSm7	LSM7_HUMAN	652.893	485	9.3507
Q9UK76	JPT1	Jupiter microtubule associated homolog 1	JUPI1_HUMAN	56946.5	157	15.7973				Q9UK76	JPT1	Jupiter microtubule associated homolog 1	JUPI1_HUMAN	730.95	428	9.51363
Q9UKD2	MRTO4	mRNA turnover protein 4 homolog	MRT4_HUMAN	5082.04	1081	12.3112				Q9UKD2	MRTO4	mRNA turnover protein 4 homolog	MRT4_HUMAN	523.213	601	9.03125
Q9UKK9	NUDT5	ADP-sugar pyrophosphatase	NUDT5_HUMAN	8255.5	888	13.0111				Q9UKK9	NUDT5	ADP-sugar pyrophosphatase	NUDT5_HUMAN	312.114	847	8.28593
Q9UKM9	RALY	RNA-binding protein Raly	RALY_HUMAN	22393.9	401	14.4508				Q9UKM9	RALY	RNA-binding protein Raly	RALY_HUMAN	658.606	481	9.36327
Q9UKV3	ACIN1	Apoptotic chromatin condensation inducer in the nucleus	ACINU_HUMAN	3376.06	1151	11.7211				Q9UKV3	ACIN1	Apoptotic chromatin condensation inducer in the nucleus	ACINU_HUMAN	130.621	1132	7.02924
Q9UKX7	NUP50	Nuclear pore complex protein Nup50	NUP50_HUMAN	5706.44	1048	12.4784				Q9UKX7	NUP50	Nuclear pore complex protein Nup50	NUP50_HUMAN	242.854	955	7.92395
Q9UKY7	CDV3	Protein CDV3 homolog	CDV3_HUMAN	15834.3	561	13.9508				Q9UKY7	CDV3	Protein CDV3 homolog	CDV3_HUMAN	415.229	721	8.69776
Q9UL25	RAB21	Ras-related protein Rab-21	RAB21_HUMAN	13221.7	658	13.6906				Q9UL25	RAB21	Ras-related protein Rab-21	RAB21_HUMAN	348.763	792	8.4461
Q9UL46	PSME2	Proteasome activator complex subunit 2	PSME2_HUMAN	23342	385	14.5106				Q9UL46	PSME2	Proteasome activator complex subunit 2	PSME2_HUMAN	705.241	450	9.46197
Q9ULC4	MCTS1	Malignant T-cell-amplified sequence 1	MCTS1_HUMAN	12510.3	694	13.6108				Q9ULC4	MCTS1	Malignant T-cell-amplified sequence 1	MCTS1_HUMAN	381.042	756	8.57381
Q9ULV4	CORO1C	Coronin-1C	COR1C_HUMAN	13950.9	623	13.7681				Q9ULV4	CORO1C	Coronin-1C	COR1C_HUMAN	381.374	755	8.57506
Q9ULW0	TPX2	Targeting protein for Xklp2	TPX2_HUMAN	41436.1	235	15.3386				Q9ULW0	TPX2	Targeting protein for Xklp2	TPX2_HUMAN	126.546	1136	6.98352
Q9UM00	TMCO1	Calcium load-activated calcium channel	TMCO1_HUMAN	11537.6	731	13.4941				Q9UM00	TMCO1	Calcium load-activated calcium channel	TMCO1_HUMAN	198.572	1034	7.63352
Q9UM54	MYO6	Unconventional myosin-VI	MYO6_HUMAN	15235.4	574	13.8951				Q9UM54	MYO6	Unconventional myosin-VI	MYO6_HUMAN	425.179	703	8.73193
Q9UMS4	PRPF19	Pre-mRNA-processing factor 19	PRP19_HUMAN	21940.5	411	14.4213				Q9UMS4	PRPF19	Pre-mRNA-processing factor 19	PRP19_HUMAN	598.341	535	9.22483
Q9UMY4	SNX12	Sorting nexin-12	SNX12_HUMAN	5045.03	1085	12.3006				Q9UMY4	SNX12	Sorting nexin-12	SNX12_HUMAN	191.292	1044	7.57964
Q9UN86	G3BP2	Ras GTPase-activating protein-binding protein 2	G3BP2_HUMAN	5959.86	1025	12.5411				Q9UN86	G3BP2	Ras GTPase-activating protein-binding protein 2	G3BP2_HUMAN	417.02	717	8.70397
Q9UNH7	SNX6	Sorting nexin-6	SNX6_HUMAN	5238.71	1071	12.355				Q9UNH7	SNX6	Sorting nexin-6	SNX6_HUMAN	344.798	801	8.42961
Q9UNM6	PSMD13	26S proteasome non-ATPase regulatory subunit 13	PSD13_HUMAN	19798.7	458	14.2731				Q9UNM6	PSMD13	26S proteasome non-ATPase regulatory subunit 13	PSD13_HUMAN	734.488	425	9.5206
Q9UNS2	COPS3	COP9 signalosome complex subunit 3	CSN3_HUMAN	9580.64	814	13.2259				Q9UNS2	COPS3	COP9 signalosome complex subunit 3	CSN3_HUMAN	458.705	666	8.84142
Q9UNZ2	NSFL1C	NSFL1 cofactor p47	NSF1C_HUMAN	8045.26	901	12.9739				Q9UNZ2	NSFL1C	NSFL1 cofactor p47	NSF1C_HUMAN	328.573	825	8.36007
Q9UQ35	SRRM2	Serine/arginine repetitive matrix protein 2	SRRM2_HUMAN	15064.4	582	13.8789				Q9UQ35	SRRM2	Serine/arginine repetitive matrix protein 2	SRRM2_HUMAN	482.392	637	8.91406
Q9UQ80	PA2G4	Proliferation-associated protein 2G4	PA2G4_HUMAN	83425.2	100	16.3482				Q9UQ80	PA2G4	Proliferation-associated protein 2G4	PA2G4_HUMAN	2807.3	93	11.455
Q9UQE7	SMC3	Structural maintenance of chromosomes protein 3	SMC3_HUMAN	6382.44	996	12.6399				Q9UQE7	SMC3	Structural maintenance of chromosomes protein 3	SMC3_HUMAN	185.929	1052	7.53861
Q9Y224	RTRAF	RNA transcription, translation and transport factor protein	RTRAF_HUMAN	12717.7	683	13.6345				Q9Y224	RTRAF	RNA transcription, translation and transport factor protein	RTRAF_HUMAN	412.342	723	8.6877
Q9Y230	RUVBL2	RuvB-like 2	RUVB2_HUMAN	21833.2	417	14.4142				Q9Y230	RUVBL2	RuvB-like 2	RUVB2_HUMAN	681.271	463	9.41208
Q9Y237	PIN4	Peptidyl-prolyl cis-trans isomerase NIMA-interacting 4	PIN4_HUMAN	17666.7	519	14.1087				Q9Y237	PIN4	Peptidyl-prolyl cis-trans isomerase NIMA-interacting 4	PIN4_HUMAN	555.021	570	9.1164
Q9Y262	EIF3L	Eukaryotic translation initiation factor 3 subunit L	EIF3L_HUMAN	14740.6	592	13.8475				Q9Y262	EIF3L	Eukaryotic translation initiation factor 3 subunit L	EIF3L_HUMAN	834.91	382	9.70548
Q9Y265	RUVBL1	RuvB-like 1	RUVB1_HUMAN	20119.2	454	14.2963				Q9Y265	RUVBL1	RuvB-like 1	RUVB1_HUMAN	851.267	376	9.73347
Q9Y266	NUDC	Nuclear migration protein nudC	NUDC_HUMAN	13523.3	641	13.7232				Q9Y266	NUDC	Nuclear migration protein nudC	NUDC_HUMAN	1177.29	272	10.2013
Q9Y277	VDAC3	Voltage-dependent anion-selective channel protein 3	VDAC3_HUMAN	4358.3	1121	12.0895				Q9Y277	VDAC3	Voltage-dependent anion-selective channel protein 3	VDAC3_HUMAN	85.5035	1172	6.41791
Q9Y281	CFL2	Cofilin-2	COF2_HUMAN	14417.6	610	13.8155				Q9Y281	CFL2	Cofilin-2	COF2_HUMAN	572.695	550	9.16162
Q9Y287	ITM2B	Integral membrane protein 2B	ITM2B_HUMAN	7091.8	965	12.7919				Q9Y287	ITM2B	Integral membrane protein 2B	ITM2B_HUMAN	620.712	516	9.27778
Q9Y2D5	AKAP2	A-kinase anchor protein 2	AKAP2_HUMAN	5668.84	1050	12.4688				Q9Y2D5	AKAP2	A-kinase anchor protein 2	AKAP2_HUMAN	250.404	946	7.96811
Q9Y2L1	DIS3	Exosome complex exonuclease RRP44	RRP44_HUMAN	5116.7	1079	12.321				Q9Y2L1	DIS3	Exosome complex exonuclease RRP44	RRP44_HUMAN	182.966	1059	7.51543
Q9Y2S6	TMA7	Translation machinery-associated protein 7	TMA7_HUMAN	30853.1	311	14.9131				Q9Y2S6	TMA7	Translation machinery-associated protein 7	TMA7_HUMAN	1242.4	261	10.2789
Q9Y2W1	THRAP3	Thyroid hormone receptor-associated protein 3	TR150_HUMAN	10950.7	758	13.4187				Q9Y2W1	THRAP3	Thyroid hormone receptor-associated protein 3	TR150_HUMAN	348.529	794	8.44514
Q9Y2Z0	SUGT1	Protein SGT1 homolog	SGT1_HUMAN	17950.1	515	14.1317				Q9Y2Z0	SUGT1	Protein SGT1 homolog	SGT1_HUMAN	807.711	389	9.6577
Q9Y333	LSM2	U6 snRNA-associated Sm-like protein LSm2	LSM2_HUMAN	25009	366	14.6102				Q9Y333	LSM2	U6 snRNA-associated Sm-like protein LSm2	LSM2_HUMAN	941.731	342	9.87917
Q9Y371	SH3GLB1	Endophilin-B1	SHLB1_HUMAN	5694.46	1049	12.4753				Q9Y371	SH3GLB1	Endophilin-B1	SHLB1_HUMAN	208.736	1008	7.70554
Q9Y383	LUC7L2	Putative RNA-binding protein Luc7-like 2	LC7L2_HUMAN	7322.96	949	12.8382				Q9Y383	LUC7L2	Putative RNA-binding protein Luc7-like 2	LC7L2_HUMAN	412.261	724	8.68741
Q9Y3A5	SBDS	Ribosome maturation protein SBDS	SBDS_HUMAN	19451.9	468	14.2476				Q9Y3A5	SBDS	Ribosome maturation protein SBDS	SBDS_HUMAN	623.115	510	9.28336
Q9Y3B8	REXO2	Oligoribonuclease, mitochondrial	ORN_HUMAN	18075.9	512	14.1418				Q9Y3B8	REXO2	Oligoribonuclease, mitochondrial	ORN_HUMAN	576.139	546	9.17027
Q9Y3C6	PPIL1	Peptidyl-prolyl cis-trans isomerase-like 1	PPIL1_HUMAN	10723	767	13.3884				Q9Y3C6	PPIL1	Peptidyl-prolyl cis-trans isomerase-like 1	PPIL1_HUMAN	416.838	719	8.70334
Q9Y3E7	CHMP3	Charged multivesicular body protein 3	CHMP3_HUMAN	6817.63	974	12.7351				Q9Y3E7	CHMP3	Charged multivesicular body protein 3	CHMP3_HUMAN	94.8852	1167	6.56811
Q9Y3F4	STRAP	Serine-threonine kinase receptor-associated protein	STRAP_HUMAN	20194.2	448	14.3017				Q9Y3F4	STRAP	Serine-threonine kinase receptor-associated protein	STRAP_HUMAN	588.612	541	9.20117
Q9Y3I0	RTCB	tRNA-splicing ligase RtcB homolog	RTCB_HUMAN	14347.7	614	13.8085				Q9Y3I0	RTCB	tRNA-splicing ligase RtcB homolog	RTCB_HUMAN	368.771	770	8.52658
Q9Y3U8	RPL36	60S ribosomal protein L36	RL36_HUMAN	27116.4	349	14.7269				Q9Y3U8	RPL36	60S ribosomal protein L36	RL36_HUMAN	788.25	401	9.62251
Q9Y3Z3	SAMHD1	Deoxynucleoside triphosphate triphosphohydrolase SAMHD1	SAMH1_HUMAN	7718.89	919	12.9142				Q9Y3Z3	SAMHD1	Deoxynucleoside triphosphate triphosphohydrolase SAMHD1	SAMH1_HUMAN	472.671	653	8.88469
Q9Y490	TLN1	Talin-1	TLN1_HUMAN	42133.9	229	15.3627				Q9Y490	TLN1	Talin-1	TLN1_HUMAN	1586.22	196	10.6314
Q9Y4E8	USP15	Ubiquitin carboxyl-terminal hydrolase 15	UBP15_HUMAN	4897.14	1094	12.2577				Q9Y4E8	USP15	Ubiquitin carboxyl-terminal hydrolase 15	UBP15_HUMAN	243.363	954	7.92696
Q9Y4L1	HYOU1	Hypoxia up-regulated protein 1	HYOU1_HUMAN	19070.4	483	14.219				Q9Y4L1	HYOU1	Hypoxia up-regulated protein 1	HYOU1_HUMAN	911.687	353	9.8324
Q9Y4Z0	LSM4	U6 snRNA-associated Sm-like protein LSm4	LSM4_HUMAN	8792.83	853	13.1021				Q9Y4Z0	LSM4	U6 snRNA-associated Sm-like protein LSm4	LSM4_HUMAN	237.084	966	7.88926
Q9Y520	PRRC2C	Protein PRRC2C	PRC2C_HUMAN	9635.68	810	13.2342				Q9Y520	PRRC2C	Protein PRRC2C	PRC2C_HUMAN	215.183	1001	7.74942
Q9Y570	PPME1	Protein phosphatase methylesterase 1	PPME1_HUMAN	6758.8	976	12.7226				Q9Y570	PPME1	Protein phosphatase methylesterase 1	PPME1_HUMAN	244.891	953	7.936
Q9Y5B9	SUPT16H	FACT complex subunit SPT16	SP16H_HUMAN	17058.5	534	14.0582				Q9Y5B9	SUPT16H	FACT complex subunit SPT16	SP16H_HUMAN	524.097	598	9.03369
Q9Y5S9	RBM8A	RNA-binding protein 8A	RBM8A_HUMAN	10031.3	800	13.2922				Q9Y5S9	RBM8A	RNA-binding protein 8A	RBM8A_HUMAN	263.352	924	8.04085
Q9Y617	PSAT1	Phosphoserine aminotransferase	SERC_HUMAN	47229.6	199	15.5274				Q9Y617	PSAT1	Phosphoserine aminotransferase	SERC_HUMAN	1450.89	215	10.5027
Q9Y678	COPG1	Coatomer subunit gamma-1	COPG1_HUMAN	13852.2	631	13.7578				Q9Y678	COPG1	Coatomer subunit gamma-1	COPG1_HUMAN	475.699	642	8.89391
Q9Y696	CLIC4	Chloride intracellular channel protein 4	CLIC4_HUMAN	22169.4	406	14.4363				Q9Y696	CLIC4	Chloride intracellular channel protein 4	CLIC4_HUMAN	333.494	814	8.38152
Q9Y6E0	STK24	Serine/threonine-protein kinase 24	STK24_HUMAN	2861.61	1164	11.4826				Q9Y6E0	STK24	Serine/threonine-protein kinase 24	STK24_HUMAN	111.779	1153	6.8045
Q9Y6G9	DYNC1LI1	Cytoplasmic dynein 1 light intermediate chain 1	DC1L1_HUMAN	10422.4	787	13.3474				Q9Y6G9	DYNC1LI1	Cytoplasmic dynein 1 light intermediate chain 1	DC1L1_HUMAN	362.449	775	8.50164
Q9Y6M1	IGF2BP2	Insulin-like growth factor 2 mRNA-binding protein 2	IF2B2_HUMAN	6121.77	1013	12.5797				Q9Y6M1	IGF2BP2	Insulin-like growth factor 2 mRNA-binding protein 2	IF2B2_HUMAN	254.619	934	7.99219

## Sheet: Figure 3c
PG.ProteinAccessions	PG.Genes	PG.ProteinDescriptions	[24] JHU_LM2_PACC_E4_100_120min_1.raw.PG.Quantity	rank					PG.ProteinAccessions	PG.Genes	PG.ProteinDescriptions	PG.ProteinNames	[24] JHU_LM2_PACC_E4_100_120min.raw.PG.Quantity	rank			0.871088
A0A0B4J2D5;P0DPI2	GATD3B;GATD3A	Glutamine amidotransferase-like class 1 domain-containing protein 3B, mitochondrial;Glutamine amidotransferase-like class 1 domain-containing protein 3A, mitochondrial	89.3881	2968	6.48201				A0A0B4J2D5;P0DPI2	GATD3B;GATD3A	Glutamine amidotransferase-like class 1 domain-containing protein 3B, mitochondrial;Glutamine amidotransferase-like class 1 domain-containing protein 3A, mitochondrial	GAL3B_HUMAN;GAL3A_HUMAN	136.686	2745	7.09473
A0AVT1	UBA6	Ubiquitin-like modifier-activating enzyme 6	1037.64	958	10.0191				A0AVT1	UBA6	Ubiquitin-like modifier-activating enzyme 6	UBA6_HUMAN	1376.3	697	10.4266
A0FGR8	ESYT2	Extended synaptotagmin-2	593.549	1403	9.21322				A0FGR8	ESYT2	Extended synaptotagmin-2	ESYT2_HUMAN	756.178	1076	9.56258
A0MZ66	SHTN1	Shootin-1	36.8013	3122	5.20168				A0MZ66	SHTN1	Shootin-1	SHOT1_HUMAN	96.3152	2926	6.58969
A5YKK6	CNOT1	CCR4-NOT transcription complex subunit 1	294.065	2141	8.19999				A5YKK6	CNOT1	CCR4-NOT transcription complex subunit 1	CNOT1_HUMAN	234.571	2282	7.87388
A6NCE7;Q9GZQ8	MAP1LC3B2;MAP1LC3B	Microtubule-associated proteins 1A/1B light chain 3 beta 2;Microtubule-associated proteins 1A/1B light chain 3B	1161.62	887	10.1819				A6NCE7;Q9GZQ8	MAP1LC3B2;MAP1LC3B	Microtubule-associated proteins 1A/1B light chain 3 beta 2;Microtubule-associated proteins 1A/1B light chain 3B	MP3B2_HUMAN;MLP3B_HUMAN	2580.67	389	11.3335
A6NDG6	PGP	Glycerol-3-phosphate phosphatase	473.457	1624	8.88709				A6NDG6	PGP	Glycerol-3-phosphate phosphatase	PGP_HUMAN	515.615	1441	9.01015
A6NDU8	C5orf51	UPF0600 protein C5orf51	188.112	2535	7.55545				A6NDU8	C5orf51	UPF0600 protein C5orf51	CE051_HUMAN	225.624	2314	7.81777
A6NHR9	SMCHD1	Structural maintenance of chromosomes flexible hinge domain-containing protein 1	2409.21	473	11.2343				A6NHR9	SMCHD1	Structural maintenance of chromosomes flexible hinge domain-containing protein 1	SMHD1_HUMAN	2376.15	429	11.2144
A8MXV4	NUDT19	Nucleoside diphosphate-linked moiety X motif 19	401.728	1811	8.65008				A8MXV4	NUDT19	Nucleoside diphosphate-linked moiety X motif 19	NUD19_HUMAN	240.664	2241	7.91088
E9PAV3;Q13765	NACA	Nascent polypeptide-associated complex subunit alpha, muscle-specific form;Nascent polypeptide-associated complex subunit alpha	2836.36	403	11.4698				E9PAV3;Q13765	NACA	Nascent polypeptide-associated complex subunit alpha, muscle-specific form;Nascent polypeptide-associated complex subunit alpha	NACAM_HUMAN;NACA_HUMAN	2389.81	426	11.2227
E9PRG8	C11orf98	Uncharacterized protein C11orf98	761.578	1173	9.57285				E9PRG8	C11orf98	Uncharacterized protein C11orf98	CK098_HUMAN	552.887	1363	9.11084
L0R819	ASDURF	ASNSD1 upstream open reading frame protein	341.386	1995	8.41526				L0R819	ASDURF	ASNSD1 upstream open reading frame protein	ASURF_HUMAN	292.143	2029	8.19053
O00116	AGPS	Alkyldihydroxyacetonephosphate synthase, peroxisomal	578.435	1430	9.17601				O00116	AGPS	Alkyldihydroxyacetonephosphate synthase, peroxisomal	ADAS_HUMAN	247.517	2213	7.95138
O00139	KIF2A	Kinesin-like protein KIF2A	659.725	1318	9.36572				O00139	KIF2A	Kinesin-like protein KIF2A	KIF2A_HUMAN	813.694	1020	9.66834
O00148	DDX39A	ATP-dependent RNA helicase DDX39A	1306.63	812	10.3516				O00148	DDX39A	ATP-dependent RNA helicase DDX39A	DX39A_HUMAN	3957.44	240	11.9504
O00151	PDLIM1	PDZ and LIM domain protein 1	793.144	1154	9.63144				O00151	PDLIM1	PDZ and LIM domain protein 1	PDLI1_HUMAN	1538.65	636	10.5875
O00154	ACOT7	Cytosolic acyl coenzyme A thioester hydrolase	3478.36	332	11.7642				O00154	ACOT7	Cytosolic acyl coenzyme A thioester hydrolase	BACH_HUMAN	1593.9	621	10.6383
O00159	MYO1C	Unconventional myosin-Ic	1350.34	795	10.3991				O00159	MYO1C	Unconventional myosin-Ic	MYO1C_HUMAN	2198.28	463	11.1022
O00161	SNAP23	Synaptosomal-associated protein 23	93.4625	2948	6.54632				O00161	SNAP23	Synaptosomal-associated protein 23	SNP23_HUMAN	107.195	2877	6.74409
O00170	AIP	AH receptor-interacting protein	446.465	1693	8.8024				O00170	AIP	AH receptor-interacting protein	AIP_HUMAN	288.994	2042	8.1749
O00178	GTPBP1	GTP-binding protein 1	75.1125	3023	6.23098				O00178	GTPBP1	GTP-binding protein 1	GTPB1_HUMAN	93.5771	2940	6.54808
O00186	STXBP3	Syntaxin-binding protein 3	138.091	2753	7.10948				O00186	STXBP3	Syntaxin-binding protein 3	STXB3_HUMAN	156.807	2641	7.29285
O00203	AP3B1	AP-3 complex subunit beta-1	927.897	1023	9.85782				O00203	AP3B1	AP-3 complex subunit beta-1	AP3B1_HUMAN	939.865	925	9.87631
O00220	TNFRSF10A	Tumor necrosis factor receptor superfamily member 10A	423.982	1747	8.72786				O00220	TNFRSF10A	Tumor necrosis factor receptor superfamily member 10A	TR10A_HUMAN	384.557	1718	8.58705
O00231	PSMD11	26S proteasome non-ATPase regulatory subunit 11	2669.32	428	11.3823				O00231	PSMD11	26S proteasome non-ATPase regulatory subunit 11	PSD11_HUMAN	2290.09	448	11.1612
O00232	PSMD12	26S proteasome non-ATPase regulatory subunit 12	800.429	1145	9.64463				O00232	PSMD12	26S proteasome non-ATPase regulatory subunit 12	PSD12_HUMAN	528.256	1419	9.04509
O00233	PSMD9	26S proteasome non-ATPase regulatory subunit 9	1308.46	811	10.3537				O00233	PSMD9	26S proteasome non-ATPase regulatory subunit 9	PSMD9_HUMAN	909.885	949	9.82954
O00244	ATOX1	Copper transport protein ATOX1	1892.74	607	10.8863				O00244	ATOX1	Copper transport protein ATOX1	ATOX1_HUMAN	1748.3	576	10.7717
O00255	MEN1	Menin	42.9672	3109	5.42516				O00255	MEN1	Menin	MEN1_HUMAN	42.4045	3122	5.40615
O00264	PGRMC1	Membrane-associated progesterone receptor component 1	1158.72	891	10.1783				O00264	PGRMC1	Membrane-associated progesterone receptor component 1	PGRC1_HUMAN	539.574	1389	9.07568
O00267	SUPT5H	Transcription elongation factor SPT5	413.441	1776	8.69154				O00267	SUPT5H	Transcription elongation factor SPT5	SPT5H_HUMAN	464.696	1549	8.86014
O00273	DFFA	DNA fragmentation factor subunit alpha	532.488	1524	9.05661				O00273	DFFA	DNA fragmentation factor subunit alpha	DFFA_HUMAN	510.512	1453	8.9958
O00299	CLIC1	Chloride intracellular channel protein 1	15594.6	44	13.9288				O00299	CLIC1	Chloride intracellular channel protein 1	CLIC1_HUMAN	15903.5	37	13.9571
O00303	EIF3F	Eukaryotic translation initiation factor 3 subunit F	3826.83	289	11.9019				O00303	EIF3F	Eukaryotic translation initiation factor 3 subunit F	EIF3F_HUMAN	3052.89	324	11.576
O00330	PDHX	Pyruvate dehydrogenase protein X component, mitochondrial	103.872	2904	6.69866				O00330	PDHX	Pyruvate dehydrogenase protein X component, mitochondrial	ODPX_HUMAN	40.1704	3128	5.32806
O00391	QSOX1	Sulfhydryl oxidase 1	13.4863	3152	3.75342				O00391	QSOX1	Sulfhydryl oxidase 1	QSOX1_HUMAN	327.161	1905	8.35386
O00401	WASL	Neural Wiskott-Aldrich syndrome protein	291.386	2149	8.18679				O00401	WASL	Neural Wiskott-Aldrich syndrome protein	WASL_HUMAN	375.959	1749	8.55443
O00410	IPO5	Importin-5	2869.42	400	11.4865				O00410	IPO5	Importin-5	IPO5_HUMAN	3200.94	306	11.6443
O00422	SAP18	Histone deacetylase complex subunit SAP18	1018.21	964	9.99182				O00422	SAP18	Histone deacetylase complex subunit SAP18	SAP18_HUMAN	125.281	2787	6.96902
O00425	IGF2BP3	Insulin-like growth factor 2 mRNA-binding protein 3	203.211	2470	7.66683				O00425	IGF2BP3	Insulin-like growth factor 2 mRNA-binding protein 3	IF2B3_HUMAN	178.587	2542	7.48049
O00429	DNM1L	Dynamin-1-like protein	1415.13	763	10.4667				O00429	DNM1L	Dynamin-1-like protein	DNM1L_HUMAN	1363.37	707	10.413
O00442	RTCA	RNA 3'-terminal phosphate cyclase	292.727	2145	8.19341				O00442	RTCA	RNA 3'-terminal phosphate cyclase	RTCA_HUMAN	158.633	2629	7.30955
O00458	IFRD1	Interferon-related developmental regulator 1	56.8533	3075	5.82917				O00458	IFRD1	Interferon-related developmental regulator 1	IFRD1_HUMAN	91.0999	2953	6.50938
O00461	GOLIM4	Golgi integral membrane protein 4	15.4285	3150	3.94752				O00461	GOLIM4	Golgi integral membrane protein 4	GOLI4_HUMAN	102.399	2898	6.67805
O00469	PLOD2	Procollagen-lysine,2-oxoglutarate 5-dioxygenase 2	242.399	2329	7.92124				O00469	PLOD2	Procollagen-lysine,2-oxoglutarate 5-dioxygenase 2	PLOD2_HUMAN	340.108	1857	8.40985
O00471	EXOC5	Exocyst complex component 5	91.3423	2960	6.51321				O00471	EXOC5	Exocyst complex component 5	EXOC5_HUMAN	20.978	3164	4.39081
O00483	NDUFA4	Cytochrome c oxidase subunit NDUFA4	557.954	1471	9.124				O00483	NDUFA4	Cytochrome c oxidase subunit NDUFA4	NDUA4_HUMAN	298.787	2006	8.22297
O00487	PSMD14	26S proteasome non-ATPase regulatory subunit 14	2052.07	555	11.0029				O00487	PSMD14	26S proteasome non-ATPase regulatory subunit 14	PSDE_HUMAN	2367.91	430	11.2094
O00499	BIN1	Myc box-dependent-interacting protein 1	532.266	1525	9.056				O00499	BIN1	Myc box-dependent-interacting protein 1	BIN1_HUMAN	106.127	2885	6.72965
O00505	KPNA3	Importin subunit alpha-4	833.323	1107	9.70273				O00505	KPNA3	Importin subunit alpha-4	IMA4_HUMAN	1391.62	691	10.4425
O00541	PES1	Pescadillo homolog	708.081	1253	9.46777				O00541	PES1	Pescadillo homolog	PESC_HUMAN	779.193	1048	9.60584
O00560	SDCBP	Syntenin-1	391.438	1833	8.61264				O00560	SDCBP	Syntenin-1	SDCB1_HUMAN	561.656	1347	9.13354
O00567	NOP56	Nucleolar protein 56	721.034	1231	9.49392				O00567	NOP56	Nucleolar protein 56	NOP56_HUMAN	872.775	978	9.76947
O00571	DDX3X	ATP-dependent RNA helicase DDX3X	1531.93	714	10.5811				O00571	DDX3X	ATP-dependent RNA helicase DDX3X	DDX3X_HUMAN	1051.66	861	10.0384
O00592	PODXL	Podocalyxin	1767.23	643	10.7873				O00592	PODXL	Podocalyxin	PODXL_HUMAN	3084.27	317	11.5907
O00622	CYR61	Protein CYR61	2463.35	458	11.2664				O00622	CYR61	Protein CYR61	CYR61_HUMAN	2700.99	374	11.3993
O00743	PPP6C	Serine/threonine-protein phosphatase 6 catalytic subunit	2142.96	534	11.0654				O00743	PPP6C	Serine/threonine-protein phosphatase 6 catalytic subunit	PPP6_HUMAN	1855.58	538	10.8577
O00762	UBE2C	Ubiquitin-conjugating enzyme E2 C	715.288	1239	9.48238				O00762	UBE2C	Ubiquitin-conjugating enzyme E2 C	UBE2C_HUMAN	512.246	1447	9.00069
O00764	PDXK	Pyridoxal kinase	852.824	1095	9.7361				O00764	PDXK	Pyridoxal kinase	PDXK_HUMAN	569.649	1331	9.15393
O14497	ARID1A	AT-rich interactive domain-containing protein 1A	230.795	2370	7.85047				O14497	ARID1A	AT-rich interactive domain-containing protein 1A	ARI1A_HUMAN	95.7783	2930	6.58163
O14530	TXNDC9	Thioredoxin domain-containing protein 9	607.572	1390	9.24691				O14530	TXNDC9	Thioredoxin domain-containing protein 9	TXND9_HUMAN	489.767	1493	8.93595
O14578	CIT	Citron Rho-interacting kinase	195.331	2503	7.60978				O14578	CIT	Citron Rho-interacting kinase	CTRO_HUMAN	159.488	2626	7.3173
O14579	COPE	Coatomer subunit epsilon	715.216	1240	9.48223				O14579	COPE	Coatomer subunit epsilon	COPE_HUMAN	388.07	1707	8.60017
O14617	AP3D1	AP-3 complex subunit delta-1	381.742	1856	8.57645				O14617	AP3D1	AP-3 complex subunit delta-1	AP3D1_HUMAN	253.59	2181	7.98635
O14618	CCS	Copper chaperone for superoxide dismutase	172.646	2606	7.43167				O14618	CCS	Copper chaperone for superoxide dismutase	CCS_HUMAN	310.026	1972	8.27624
O14639	ABLIM1	Actin-binding LIM protein 1	62.0639	3059	5.95568				O14639	ABLIM1	Actin-binding LIM protein 1	ABLM1_HUMAN	94.4026	2937	6.56075
O14641	DVL2	Segment polarity protein dishevelled homolog DVL-2	86.0513	2983	6.42713				O14641	DVL2	Segment polarity protein dishevelled homolog DVL-2	DVL2_HUMAN	37.6773	3133	5.23562
O14657	TOR1B	Torsin-1B	157.515	2668	7.29934				O14657	TOR1B	Torsin-1B	TOR1B_HUMAN	165.925	2599	7.37439
O14672	ADAM10	Disintegrin and metalloproteinase domain-containing protein 10	501.99	1565	8.97152				O14672	ADAM10	Disintegrin and metalloproteinase domain-containing protein 10	ADA10_HUMAN	328.162	1899	8.35827
O14684	PTGES	Prostaglandin E synthase	257.659	2270	8.00932				O14684	PTGES	Prostaglandin E synthase	PTGES_HUMAN	108.578	2868	6.76259
O14727	APAF1	Apoptotic protease-activating factor 1	4074.29	269	11.9923				O14727	APAF1	Apoptotic protease-activating factor 1	APAF_HUMAN	60.0923	3081	5.90911
O14734	ACOT8	Acyl-coenzyme A thioesterase 8	389.216	1839	8.60443				O14734	ACOT8	Acyl-coenzyme A thioesterase 8	ACOT8_HUMAN	234.183	2283	7.87149
O14737	PDCD5	Programmed cell death protein 5	1701.08	660	10.7322				O14737	PDCD5	Programmed cell death protein 5	PDCD5_HUMAN	1027.61	876	10.0051
O14744	PRMT5	Protein arginine N-methyltransferase 5	1249.91	842	10.2876				O14744	PRMT5	Protein arginine N-methyltransferase 5	ANM5_HUMAN	1275.12	748	10.3164
O14745	SLC9A3R1	Na(+)/H(+) exchange regulatory cofactor NHE-RF1	925.364	1030	9.85388				O14745	SLC9A3R1	Na(+)/H(+) exchange regulatory cofactor NHE-RF1	NHRF1_HUMAN	813.012	1021	9.66713
O14757	CHEK1	Serine/threonine-protein kinase Chk1	249.384	2299	7.96222				O14757	CHEK1	Serine/threonine-protein kinase Chk1	CHK1_HUMAN	252.845	2185	7.98211
O14776	TCERG1	Transcription elongation regulator 1	572.278	1441	9.16057				O14776	TCERG1	Transcription elongation regulator 1	TCRG1_HUMAN	537.622	1396	9.07045
O14777	NDC80	Kinetochore protein NDC80 homolog	258.972	2264	8.01665				O14777	NDC80	Kinetochore protein NDC80 homolog	NDC80_HUMAN	139.588	2730	7.12503
O14786	NRP1	Neuropilin-1	1040.38	956	10.0229				O14786	NRP1	Neuropilin-1	NRP1_HUMAN	1174.83	796	10.1982
O14818	PSMA7	Proteasome subunit alpha type-7	6061.78	159	12.5655				O14818	PSMA7	Proteasome subunit alpha type-7	PSA7_HUMAN	3635.08	265	11.8278
O14828	SCAMP3	Secretory carrier-associated membrane protein 3	235.052	2358	7.87683				O14828	SCAMP3	Secretory carrier-associated membrane protein 3	SCAM3_HUMAN	260.866	2154	8.02717
O14879	IFIT3	Interferon-induced protein with tetratricopeptide repeats 3	661.526	1312	9.36965				O14879	IFIT3	Interferon-induced protein with tetratricopeptide repeats 3	IFIT3_HUMAN	508.926	1458	8.99131
O14907	TAX1BP3	Tax1-binding protein 3	1747.06	651	10.7707				O14907	TAX1BP3	Tax1-binding protein 3	TX1B3_HUMAN	1071.45	855	10.0654
O14908	GIPC1	PDZ domain-containing protein GIPC1	687.908	1280	9.42607				O14908	GIPC1	PDZ domain-containing protein GIPC1	GIPC1_HUMAN	389.757	1699	8.60643
O14910	LIN7A	Protein lin-7 homolog A	1023.22	962	9.9989				O14910	LIN7A	Protein lin-7 homolog A	LIN7A_HUMAN	959.197	914	9.90568
O14920	IKBKB	Inhibitor of nuclear factor kappa-B kinase subunit beta	31.6135	3131	4.98247				O14920	IKBKB	Inhibitor of nuclear factor kappa-B kinase subunit beta	IKKB_HUMAN	691.628	1147	9.43385
O14929	HAT1	Histone acetyltransferase type B catalytic subunit	432.007	1725	8.75491				O14929	HAT1	Histone acetyltransferase type B catalytic subunit	HAT1_HUMAN	400.288	1673	8.6449
O14933	UBE2L6	Ubiquitin/ISG15-conjugating enzyme E2 L6	234.739	2360	7.87492				O14933	UBE2L6	Ubiquitin/ISG15-conjugating enzyme E2 L6	UB2L6_HUMAN	295.13	2020	8.20521
O14936	CASK	Peripheral plasma membrane protein CASK	39.5313	3115	5.30492				O14936	CASK	Peripheral plasma membrane protein CASK	CSKP_HUMAN	141.363	2720	7.14326
O14950;P19105	MYL12B;MYL12A	Myosin regulatory light chain 12B;Myosin regulatory light chain 12A	2781.72	410	11.4418				O14950;P19105	MYL12B;MYL12A	Myosin regulatory light chain 12B;Myosin regulatory light chain 12A	ML12B_HUMAN;ML12A_HUMAN	2083.21	487	11.0246
O14964	HGS	Hepatocyte growth factor-regulated tyrosine kinase substrate	457.724	1655	8.83833				O14964	HGS	Hepatocyte growth factor-regulated tyrosine kinase substrate	HGS_HUMAN	446	1579	8.8009
O14967	CLGN	Calmegin	148.884	2699	7.21804				O14967	CLGN	Calmegin	CLGN_HUMAN	187.833	2496	7.55331
O14974	PPP1R12A	Protein phosphatase 1 regulatory subunit 12A	924.343	1034	9.85228				O14974	PPP1R12A	Protein phosphatase 1 regulatory subunit 12A	MYPT1_HUMAN	962.287	911	9.91032
O14979	HNRNPDL	Heterogeneous nuclear ribonucleoprotein D-like	3437.49	335	11.7471				O14979	HNRNPDL	Heterogeneous nuclear ribonucleoprotein D-like	HNRDL_HUMAN	4704.06	198	12.1997
O14980	XPO1	Exportin-1	1770.83	642	10.7902				O14980	XPO1	Exportin-1	XPO1_HUMAN	1118.44	824	10.1273
O14981	BTAF1	TATA-binding protein-associated factor 172	106.66	2895	6.73687				O14981	BTAF1	TATA-binding protein-associated factor 172	BTAF1_HUMAN	61.2029	3075	5.93553
O15027	SEC16A	Protein transport protein Sec16A	212.069	2438	7.72839				O15027	SEC16A	Protein transport protein Sec16A	SC16A_HUMAN	1487.77	650	10.5389
O15031	PLXNB2	Plexin-B2	217.846	2416	7.76716				O15031	PLXNB2	Plexin-B2	PLXB2_HUMAN	138.313	2738	7.11179
O15042	U2SURP	U2 snRNP-associated SURP motif-containing protein	450.024	1682	8.81386				O15042	U2SURP	U2 snRNP-associated SURP motif-containing protein	SR140_HUMAN	1663.62	594	10.7001
O15056	SYNJ2	Synaptojanin-2	150.866	2690	7.23713				O15056	SYNJ2	Synaptojanin-2	SYNJ2_HUMAN	96.2166	2927	6.58821
O15067	PFAS	Phosphoribosylformylglycinamidine synthase	416.691	1773	8.70284				O15067	PFAS	Phosphoribosylformylglycinamidine synthase	PUR4_HUMAN	492.115	1491	8.94285
O15084	ANKRD28	Serine/threonine-protein phosphatase 6 regulatory ankyrin repeat subunit A	69.4156	3037	6.11719				O15084	ANKRD28	Serine/threonine-protein phosphatase 6 regulatory ankyrin repeat subunit A	ANR28_HUMAN	235.985	2276	7.88255
O15118	NPC1	NPC intracellular cholesterol transporter 1	401.963	1809	8.65092				O15118	NPC1	NPC intracellular cholesterol transporter 1	NPC1_HUMAN	298.758	2007	8.22283
O15126	SCAMP1	Secretory carrier-associated membrane protein 1	88.2018	2974	6.46274				O15126	SCAMP1	Secretory carrier-associated membrane protein 1	SCAM1_HUMAN	237.681	2265	7.89288
O15143	ARPC1B	Actin-related protein 2/3 complex subunit 1B	1330.22	800	10.3774				O15143	ARPC1B	Actin-related protein 2/3 complex subunit 1B	ARC1B_HUMAN	1830.67	549	10.8382
O15144	ARPC2	Actin-related protein 2/3 complex subunit 2	3180.63	362	11.6351				O15144	ARPC2	Actin-related protein 2/3 complex subunit 2	ARPC2_HUMAN	1029	875	10.007
O15145	ARPC3	Actin-related protein 2/3 complex subunit 3	2375.48	482	11.214				O15145	ARPC3	Actin-related protein 2/3 complex subunit 3	ARPC3_HUMAN	1766.94	573	10.787
O15160	POLR1C	DNA-directed RNA polymerases I and III subunit RPAC1	821.522	1123	9.68215				O15160	POLR1C	DNA-directed RNA polymerases I and III subunit RPAC1	RPAC1_HUMAN	692.411	1146	9.43549
O15164	TRIM24	Transcription intermediary factor 1-alpha	26.2557	3141	4.71456				O15164	TRIM24	Transcription intermediary factor 1-alpha	TIF1A_HUMAN	13.1843	3172	3.72075
O15173	PGRMC2	Membrane-associated progesterone receptor component 2	560.609	1467	9.13085				O15173	PGRMC2	Membrane-associated progesterone receptor component 2	PGRC2_HUMAN	1322.22	726	10.3687
O15212	PFDN6	Prefoldin subunit 6	575.443	1432	9.16853				O15212	PFDN6	Prefoldin subunit 6	PFD6_HUMAN	1040.67	870	10.0233
O15226	NKRF	NF-kappa-B-repressing factor	341.725	1993	8.41669				O15226	NKRF	NF-kappa-B-repressing factor	NKRF_HUMAN	241.892	2236	7.91822
O15231	ZNF185	Zinc finger protein 185	1669.25	668	10.705				O15231	ZNF185	Zinc finger protein 185	ZN185_HUMAN	1301.04	733	10.3454
O15260	SURF4	Surfeit locus protein 4	313.016	2087	8.29009				O15260	SURF4	Surfeit locus protein 4	SURF4_HUMAN	337.063	1872	8.39688
O15269	SPTLC1	Serine palmitoyltransferase 1	335.942	2015	8.39207				O15269	SPTLC1	Serine palmitoyltransferase 1	SPTC1_HUMAN	308.393	1978	8.26863
O15270	SPTLC2	Serine palmitoyltransferase 2	127.744	2803	6.99711				O15270	SPTLC2	Serine palmitoyltransferase 2	SPTC2_HUMAN	209.778	2384	7.71272
O15294	OGT	UDP-N-acetylglucosamine--peptide N-acetylglucosaminyltransferase 110 kDa subunit	440.968	1701	8.78453				O15294	OGT	UDP-N-acetylglucosamine--peptide N-acetylglucosaminyltransferase 110 kDa subunit	OGT1_HUMAN	495.074	1488	8.9515
O15305	PMM2	Phosphomannomutase 2	490.624	1588	8.93847				O15305	PMM2	Phosphomannomutase 2	PMM2_HUMAN	552.137	1365	9.10888
O15344	MID1	E3 ubiquitin-protein ligase Midline-1	109.216	2882	6.77105				O15344	MID1	E3 ubiquitin-protein ligase Midline-1	TRI18_HUMAN	75.6485	3017	6.24124
O15347	HMGB3	High mobility group protein B3	1917.05	594	10.9047				O15347	HMGB3	High mobility group protein B3	HMGB3_HUMAN	663.715	1183	9.37442
O15355	PPM1G	Protein phosphatase 1G	1468.36	741	10.52				O15355	PPM1G	Protein phosphatase 1G	PPM1G_HUMAN	1326.86	721	10.3738
O15357	INPPL1	Phosphatidylinositol 3,4,5-trisphosphate 5-phosphatase 2	85.8432	2984	6.42363				O15357	INPPL1	Phosphatidylinositol 3,4,5-trisphosphate 5-phosphatase 2	SHIP2_HUMAN	74.1776	3023	6.21291
O15371	EIF3D	Eukaryotic translation initiation factor 3 subunit D	3554.46	322	11.7954				O15371	EIF3D	Eukaryotic translation initiation factor 3 subunit D	EIF3D_HUMAN	2187.01	465	11.0947
O15372	EIF3H	Eukaryotic translation initiation factor 3 subunit H	2173.43	521	11.0858				O15372	EIF3H	Eukaryotic translation initiation factor 3 subunit H	EIF3H_HUMAN	1462.56	663	10.5143
O15382	BCAT2	Branched-chain-amino-acid aminotransferase, mitochondrial	78.9255	3012	6.30242				O15382	BCAT2	Branched-chain-amino-acid aminotransferase, mitochondrial	BCAT2_HUMAN	82.8391	2985	6.37224
O15397	IPO8	Importin-8	360.773	1923	8.49495				O15397	IPO8	Importin-8	IPO8_HUMAN	233.211	2291	7.86549
O15400	STX7	Syntaxin-7	410.858	1781	8.6825				O15400	STX7	Syntaxin-7	STX7_HUMAN	594.448	1284	9.21541
O15427	SLC16A3	Monocarboxylate transporter 4	339.187	2003	8.40594				O15427	SLC16A3	Monocarboxylate transporter 4	MOT4_HUMAN	558.257	1354	9.12478
O15446	CD3EAP	DNA-directed RNA polymerase I subunit RPA34	340.219	2000	8.41032				O15446	CD3EAP	DNA-directed RNA polymerase I subunit RPA34	RPA34_HUMAN	268.279	2122	8.06759
O15498	YKT6	Synaptobrevin homolog YKT6	3170.9	363	11.6307				O15498	YKT6	Synaptobrevin homolog YKT6	YKT6_HUMAN	192.574	2479	7.58927
O15511	ARPC5	Actin-related protein 2/3 complex subunit 5	2798.17	408	11.4503				O15511	ARPC5	Actin-related protein 2/3 complex subunit 5	ARPC5_HUMAN	2673.57	377	11.3846
O15533	TAPBP	Tapasin	252.462	2283	7.97992				O15533	TAPBP	Tapasin	TPSN_HUMAN	511.421	1451	8.99837
O15541	RNF113A	E3 ubiquitin-protein ligase RNF113A	137.048	2761	7.09853				O15541	RNF113A	E3 ubiquitin-protein ligase RNF113A	R113A_HUMAN	96.7228	2922	6.59578
O43143	DHX15	Pre-mRNA-splicing factor ATP-dependent RNA helicase DHX15	1825.05	628	10.8337				O43143	DHX15	Pre-mRNA-splicing factor ATP-dependent RNA helicase DHX15	DHX15_HUMAN	1822.94	551	10.832
O43148	RNMT	mRNA cap guanine-N7 methyltransferase	240.054	2338	7.90722				O43148	RNMT	mRNA cap guanine-N7 methyltransferase	MCES_HUMAN	263.152	2146	8.03975
O43159	RRP8	Ribosomal RNA-processing protein 8	151.111	2689	7.23947				O43159	RRP8	Ribosomal RNA-processing protein 8	RRP8_HUMAN	194.534	2473	7.60388
O43169	CYB5B	Cytochrome b5 type B	457.07	1659	8.83627				O43169	CYB5B	Cytochrome b5 type B	CYB5B_HUMAN	265.092	2134	8.05035
O43172	PRPF4	U4/U6 small nuclear ribonucleoprotein Prp4	460.905	1644	8.84833				O43172	PRPF4	U4/U6 small nuclear ribonucleoprotein Prp4	PRP4_HUMAN	594.944	1282	9.21661
O43175	PHGDH	D-3-phosphoglycerate dehydrogenase	185.406	2550	7.53454				O43175	PHGDH	D-3-phosphoglycerate dehydrogenase	SERA_HUMAN	216.844	2352	7.76051
O43237	DYNC1LI2	Cytoplasmic dynein 1 light intermediate chain 2	433.421	1723	8.75963				O43237	DYNC1LI2	Cytoplasmic dynein 1 light intermediate chain 2	DC1L2_HUMAN	447.535	1576	8.80586
O43242	PSMD3	26S proteasome non-ATPase regulatory subunit 3	1728.6	653	10.7554				O43242	PSMD3	26S proteasome non-ATPase regulatory subunit 3	PSMD3_HUMAN	1799.22	560	10.8132
O43252	PAPSS1	Bifunctional 3'-phosphoadenosine 5'-phosphosulfate synthase 1	503.338	1562	8.97538				O43252	PAPSS1	Bifunctional 3'-phosphoadenosine 5'-phosphosulfate synthase 1	PAPS1_HUMAN	412.551	1642	8.68843
O43264	ZW10	Centromere/kinetochore protein zw10 homolog	219.83	2404	7.78025				O43264	ZW10	Centromere/kinetochore protein zw10 homolog	ZW10_HUMAN	262.021	2150	8.03354
O43290	SART1	U4/U6.U5 tri-snRNP-associated protein 1	347.02	1974	8.43887				O43290	SART1	U4/U6.U5 tri-snRNP-associated protein 1	SNUT1_HUMAN	198.974	2442	7.63643
O43291	SPINT2	Kunitz-type protease inhibitor 2	545.063	1495	9.09028				O43291	SPINT2	Kunitz-type protease inhibitor 2	SPIT2_HUMAN	354.249	1818	8.46862
O43314	PPIP5K2	Inositol hexakisphosphate and diphosphoinositol-pentakisphosphate kinase 2	60.6463	3068	5.92235				O43314	PPIP5K2	Inositol hexakisphosphate and diphosphoinositol-pentakisphosphate kinase 2	VIP2_HUMAN	167.148	2594	7.38498
O43324	EEF1E1	Eukaryotic translation elongation factor 1 epsilon-1	1164.2	884	10.1851				O43324	EEF1E1	Eukaryotic translation elongation factor 1 epsilon-1	MCA3_HUMAN	578.108	1314	9.1752
O43390	HNRNPR	Heterogeneous nuclear ribonucleoprotein R	2313.25	494	11.1757				O43390	HNRNPR	Heterogeneous nuclear ribonucleoprotein R	HNRPR_HUMAN	2278.07	450	11.1536
O43395	PRPF3	U4/U6 small nuclear ribonucleoprotein Prp3	945.083	1013	9.8843				O43395	PRPF3	U4/U6 small nuclear ribonucleoprotein Prp3	PRPF3_HUMAN	855.959	995	9.7414
O43396	TXNL1	Thioredoxin-like protein 1	799.08	1146	9.6422				O43396	TXNL1	Thioredoxin-like protein 1	TXNL1_HUMAN	758.774	1069	9.56753
O43399	TPD52L2	Tumor protein D54	2243.93	506	11.1318				O43399	TPD52L2	Tumor protein D54	TPD54_HUMAN	1419.23	679	10.4709
O43432	EIF4G3	Eukaryotic translation initiation factor 4 gamma 3	98.2218	2928	6.61797				O43432	EIF4G3	Eukaryotic translation initiation factor 4 gamma 3	IF4G3_HUMAN	1478.83	656	10.5302
O43447	PPIH	Peptidyl-prolyl cis-trans isomerase H	435.644	1715	8.76701				O43447	PPIH	Peptidyl-prolyl cis-trans isomerase H	PPIH_HUMAN	404.071	1659	8.65847
O43488	AKR7A2	Aflatoxin B1 aldehyde reductase member 2	358.045	1929	8.484				O43488	AKR7A2	Aflatoxin B1 aldehyde reductase member 2	ARK72_HUMAN	220.84	2334	7.78685
O43491	EPB41L2	Band 4.1-like protein 2	685.588	1286	9.4212				O43491	EPB41L2	Band 4.1-like protein 2	E41L2_HUMAN	523.936	1425	9.03325
O43493	TGOLN2	Trans-Golgi network integral membrane protein 2	121.246	2839	6.92179				O43493	TGOLN2	Trans-Golgi network integral membrane protein 2	TGON2_HUMAN	157.571	2637	7.29986
O43504	LAMTOR5	Ragulator complex protein LAMTOR5	167.872	2630	7.39121				O43504	LAMTOR5	Ragulator complex protein LAMTOR5	LTOR5_HUMAN	143.412	2708	7.16402
O43583	DENR	Density-regulated protein	964.514	1002	9.91366				O43583	DENR	Density-regulated protein	DENR_HUMAN	969.321	907	9.92083
O43592	XPOT	Exportin-T	635.755	1346	9.31233				O43592	XPOT	Exportin-T	XPOT_HUMAN	432.85	1605	8.75772
O43615	TIMM44	Mitochondrial import inner membrane translocase subunit TIM44	949.088	1011	9.8904				O43615	TIMM44	Mitochondrial import inner membrane translocase subunit TIM44	TIM44_HUMAN	549.377	1369	9.10165
O43617	TRAPPC3	Trafficking protein particle complex subunit 3	677.846	1295	9.40481				O43617	TRAPPC3	Trafficking protein particle complex subunit 3	TPPC3_HUMAN	879.59	972	9.78069
O43633	CHMP2A	Charged multivesicular body protein 2a	33.0401	3128	5.04615				O43633	CHMP2A	Charged multivesicular body protein 2a	CHM2A_HUMAN	856.955	994	9.74308
O43660	PLRG1	Pleiotropic regulator 1	120.349	2842	6.91108				O43660	PLRG1	Pleiotropic regulator 1	PLRG1_HUMAN	82.7656	2988	6.37096
O43665	RGS10	Regulator of G-protein signaling 10	739.623	1204	9.53065				O43665	RGS10	Regulator of G-protein signaling 10	RGS10_HUMAN	268.927	2120	8.07107
O43670	ZNF207	BUB3-interacting and GLEBS motif-containing protein ZNF207	710.344	1251	9.47237				O43670	ZNF207	BUB3-interacting and GLEBS motif-containing protein ZNF207	ZN207_HUMAN	607.667	1260	9.24714
O43678	NDUFA2	NADH dehydrogenase [ubiquinone] 1 alpha subcomplex subunit 2	287.199	2163	8.16591				O43678	NDUFA2	NADH dehydrogenase [ubiquinone] 1 alpha subcomplex subunit 2	NDUA2_HUMAN	387.535	1708	8.59818
O43681	ASNA1	ATPase ASNA1	1287.79	826	10.3307				O43681	ASNA1	ATPase ASNA1	ASNA_HUMAN	1406.19	683	10.4576
O43684	BUB3	Mitotic checkpoint protein BUB3	2193.04	516	11.0987				O43684	BUB3	Mitotic checkpoint protein BUB3	BUB3_HUMAN	1458.58	666	10.5104
O43707	ACTN4	Alpha-actinin-4	5464.12	188	12.4158				O43707	ACTN4	Alpha-actinin-4	ACTN4_HUMAN	4474.84	207	12.1276
O43708	GSTZ1	Maleylacetoacetate isomerase	219.891	2403	7.78064				O43708	GSTZ1	Maleylacetoacetate isomerase	MAAI_HUMAN	378.364	1738	8.56363
O43719	HTATSF1	HIV Tat-specific factor 1	427.608	1733	8.74014				O43719	HTATSF1	HIV Tat-specific factor 1	HTSF1_HUMAN	496.445	1485	8.95549
O43747	AP1G1	AP-1 complex subunit gamma-1	443.5	1696	8.79279				O43747	AP1G1	AP-1 complex subunit gamma-1	AP1G1_HUMAN	467.535	1540	8.86893
O43752	STX6	Syntaxin-6	197.582	2489	7.62631				O43752	STX6	Syntaxin-6	STX6_HUMAN	301.905	1999	8.23795
O43765	SGTA	Small glutamine-rich tetratricopeptide repeat-containing protein alpha	1516.14	723	10.5662				O43765	SGTA	Small glutamine-rich tetratricopeptide repeat-containing protein alpha	SGTA_HUMAN	1067.17	856	10.0596
O43768	ENSA	Alpha-endosulfine	603.125	1395	9.23631				O43768	ENSA	Alpha-endosulfine	ENSA_HUMAN	165.13	2603	7.36746
O43776	NARS	Asparagine--tRNA ligase, cytoplasmic	878.989	1069	9.7797				O43776	NARS	Asparagine--tRNA ligase, cytoplasmic	SYNC_HUMAN	931.849	931	9.86395
O43795	MYO1B	Unconventional myosin-Ib	308.912	2098	8.27105				O43795	MYO1B	Unconventional myosin-Ib	MYO1B_HUMAN	214.041	2362	7.74174
O43809	NUDT21	Cleavage and polyadenylation specificity factor subunit 5	1080.74	931	10.0778				O43809	NUDT21	Cleavage and polyadenylation specificity factor subunit 5	CPSF5_HUMAN	1197.74	781	10.2261
O43813	LANCL1	Glutathione S-transferase LANCL1	714.516	1244	9.48082				O43813	LANCL1	Glutathione S-transferase LANCL1	LANC1_HUMAN	211.177	2377	7.72231
O43818	RRP9	U3 small nucleolar RNA-interacting protein 2	837.222	1104	9.70947				O43818	RRP9	U3 small nucleolar RNA-interacting protein 2	U3IP2_HUMAN	540.763	1386	9.07885
O43823	AKAP8	A-kinase anchor protein 8	1	3167.5	0				O43823	AKAP8	A-kinase anchor protein 8	AKAP8_HUMAN	16.1969	3168	4.01764
O43837	IDH3B	Isocitrate dehydrogenase [NAD] subunit beta, mitochondrial	149.059	2698	7.21974				O43837	IDH3B	Isocitrate dehydrogenase [NAD] subunit beta, mitochondrial	IDH3B_HUMAN	80.8844	2997	6.33779
O43847	NRDC	Nardilysin	528.691	1532	9.04628				O43847	NRDC	Nardilysin	NRDC_HUMAN	395.964	1689	8.62923
O43852	CALU	Calumenin	4832.92	221	12.2387				O43852	CALU	Calumenin	CALU_HUMAN	5149.11	174	12.3301
O43854	EDIL3	EGF-like repeat and discoidin I-like domain-containing protein 3	175.688	2597	7.45687				O43854	EDIL3	EGF-like repeat and discoidin I-like domain-containing protein 3	EDIL3_HUMAN	217.871	2349	7.76733
O43865	AHCYL1	S-adenosylhomocysteine hydrolase-like protein 1	988.965	991	9.94978				O43865	AHCYL1	S-adenosylhomocysteine hydrolase-like protein 1	SAHH2_HUMAN	388.593	1703	8.60211
O43920	NDUFS5	NADH dehydrogenase [ubiquinone] iron-sulfur protein 5	97.9215	2929	6.61355				O43920	NDUFS5	NADH dehydrogenase [ubiquinone] iron-sulfur protein 5	NDUS5_HUMAN	353.821	1820	8.46687
O60216	RAD21	Double-strand-break repair protein rad21 homolog	139.955	2740	7.12881				O60216	RAD21	Double-strand-break repair protein rad21 homolog	RAD21_HUMAN	198.284	2446	7.63142
O60220	TIMM8A	Mitochondrial import inner membrane translocase subunit Tim8 A	639.271	1339	9.32028				O60220	TIMM8A	Mitochondrial import inner membrane translocase subunit Tim8 A	TIM8A_HUMAN	518.304	1438	9.01765
O60231	DHX16	Pre-mRNA-splicing factor ATP-dependent RNA helicase DHX16	117.126	2852	6.87191				O60231	DHX16	Pre-mRNA-splicing factor ATP-dependent RNA helicase DHX16	DHX16_HUMAN	150.054	2675	7.22933
O60232	SSSCA1	Sjoegren syndrome/scleroderma autoantigen 1	123.537	2820	6.9488				O60232	SSSCA1	Sjoegren syndrome/scleroderma autoantigen 1	SSA27_HUMAN	271.661	2108	8.08566
O60256	PRPSAP2	Phosphoribosyl pyrophosphate synthase-associated protein 2	482.116	1607	8.91324				O60256	PRPSAP2	Phosphoribosyl pyrophosphate synthase-associated protein 2	KPRB_HUMAN	345.504	1837	8.43256
O60264	SMARCA5	SWI/SNF-related matrix-associated actin-dependent regulator of chromatin subfamily A member 5	445.85	1695	8.80041				O60264	SMARCA5	SWI/SNF-related matrix-associated actin-dependent regulator of chromatin subfamily A member 5	SMCA5_HUMAN	508.933	1457	8.99133
O60271	SPAG9	C-Jun-amino-terminal kinase-interacting protein 4	612.304	1377	9.2581				O60271	SPAG9	C-Jun-amino-terminal kinase-interacting protein 4	JIP4_HUMAN	295.348	2017	8.20627
O60306	AQR	RNA helicase aquarius	84.037	2992	6.39295				O60306	AQR	RNA helicase aquarius	AQR_HUMAN	173.17	2566	7.43605
O60313	OPA1	Dynamin-like 120 kDa protein, mitochondrial	360.378	1926	8.49337				O60313	OPA1	Dynamin-like 120 kDa protein, mitochondrial	OPA1_HUMAN	197.909	2452	7.62869
O60341	KDM1A	Lysine-specific histone demethylase 1A	389.074	1840	8.6039				O60341	KDM1A	Lysine-specific histone demethylase 1A	KDM1A_HUMAN	260.859	2155	8.02713
O60343	TBC1D4	TBC1 domain family member 4	1	3167.5	0				O60343	TBC1D4	TBC1 domain family member 4	TBCD4_HUMAN	134.687	2751	7.07347
O60443	GSDME	Gasdermin-E	562.251	1465	9.13507				O60443	GSDME	Gasdermin-E	GSDME_HUMAN	530.856	1417	9.05218
O60488	ACSL4	Long-chain-fatty-acid--CoA ligase 4	1190.92	871	10.2179				O60488	ACSL4	Long-chain-fatty-acid--CoA ligase 4	ACSL4_HUMAN	1365.21	704	10.4149
O60493	SNX3	Sorting nexin-3	1274.76	829	10.316				O60493	SNX3	Sorting nexin-3	SNX3_HUMAN	1037.76	871	10.0193
O60502	OGA	Protein O-GlcNAcase	462.222	1636	8.85244				O60502	OGA	Protein O-GlcNAcase	OGA_HUMAN	401.318	1669	8.6486
O60506	SYNCRIP	Heterogeneous nuclear ribonucleoprotein Q	4559.05	237	12.1545				O60506	SYNCRIP	Heterogeneous nuclear ribonucleoprotein Q	HNRPQ_HUMAN	4278.65	218	12.0629
O60524	NEMF	Nuclear export mediator factor NEMF	160.905	2659	7.33007				O60524	NEMF	Nuclear export mediator factor NEMF	NEMF_HUMAN	292.662	2026	8.19309
O60547	GMDS	GDP-mannose 4,6 dehydratase	267.348	2227	8.06258				O60547	GMDS	GDP-mannose 4,6 dehydratase	GMDS_HUMAN	322.955	1922	8.33519
O60551	NMT2	Glycylpeptide N-tetradecanoyltransferase 2	62.4188	3055	5.96391				O60551	NMT2	Glycylpeptide N-tetradecanoyltransferase 2	NMT2_HUMAN	25.8519	3158	4.6922
O60568	PLOD3	Multifunctional procollagen lysine hydroxylase and glycosyltransferase LH3	784.891	1158	9.61635				O60568	PLOD3	Multifunctional procollagen lysine hydroxylase and glycosyltransferase LH3	PLOD3_HUMAN	587.546	1300	9.19856
O60610	DIAPH1	Protein diaphanous homolog 1	841.391	1101	9.71663				O60610	DIAPH1	Protein diaphanous homolog 1	DIAP1_HUMAN	760.013	1067	9.56988
O60645	EXOC3	Exocyst complex component 3	151.934	2686	7.2473				O60645	EXOC3	Exocyst complex component 3	EXOC3_HUMAN	112.292	2848	6.81112
O60664	PLIN3	Perilipin-3	1938.75	587	10.9209				O60664	PLIN3	Perilipin-3	PLIN3_HUMAN	1479.54	655	10.5309
O60678	PRMT3	Protein arginine N-methyltransferase 3	354.815	1943	8.47092				O60678	PRMT3	Protein arginine N-methyltransferase 3	ANM3_HUMAN	591.002	1289	9.20702
O60684	KPNA6	Importin subunit alpha-7	1268.67	834	10.3091				O60684	KPNA6	Importin subunit alpha-7	IMA7_HUMAN	1044.1	868	10.0281
O60701	UGDH	UDP-glucose 6-dehydrogenase	1004.98	973	9.97296				O60701	UGDH	UDP-glucose 6-dehydrogenase	UGDH_HUMAN	1261.03	750	10.3004
O60711	LPXN	Leupaxin	202.519	2474	7.66192				O60711	LPXN	Leupaxin	LPXN_HUMAN	441.747	1585	8.78708
O60716	CTNND1	Catenin delta-1	487.381	1593	8.9289				O60716	CTNND1	Catenin delta-1	CTND1_HUMAN	442.593	1584	8.78984
O60749	SNX2	Sorting nexin-2	862.807	1083	9.75289				O60749	SNX2	Sorting nexin-2	SNX2_HUMAN	885.272	966	9.78998
O60762	DPM1	Dolichol-phosphate mannosyltransferase subunit 1	371.486	1883	8.53717				O60762	DPM1	Dolichol-phosphate mannosyltransferase subunit 1	DPM1_HUMAN	610.166	1254	9.25306
O60763	USO1	General vesicular transport factor p115	727.349	1226	9.5065				O60763	USO1	General vesicular transport factor p115	USO1_HUMAN	1190.96	784	10.2179
O60814;P57053;P58876;P62807;Q5QNW6;Q93079;Q99877;Q99879;Q99880	HIST1H2BK;H2BFS;HIST1H2BD;HIST1H2BC;HIST2H2BF;HIST1H2BH;HIST1H2BN;HIST1H2BM;HIST1H2BL	Histone H2B type 1-K;Histone H2B type F-S;Histone H2B type 1-D;Histone H2B type 1-C/E/F/G/I;Histone H2B type 2-F;Histone H2B type 1-H;Histone H2B type 1-N;Histone H2B type 1-M;Histone H2B type 1-L	46574.3	8	15.5072				O60814;P57053;P58876;P62807;Q5QNW6;Q93079;Q99877;Q99879;Q99880	HIST1H2BK;H2BFS;HIST1H2BD;HIST1H2BC;HIST2H2BF;HIST1H2BH;HIST1H2BN;HIST1H2BM;HIST1H2BL	Histone H2B type 1-K;Histone H2B type F-S;Histone H2B type 1-D;Histone H2B type 1-C/E/F/G/I;Histone H2B type 2-F;Histone H2B type 1-H;Histone H2B type 1-N;Histone H2B type 1-M;Histone H2B type 1-L	H2B1K_HUMAN;H2BFS_HUMAN;H2B1D_HUMAN;H2B1C_HUMAN;H2B2F_HUMAN;H2B1H_HUMAN;H2B1N_HUMAN;H2B1M_HUMAN;H2B1L_HUMAN	59610.2	2	15.8633
O60826	CCDC22	Coiled-coil domain-containing protein 22	183.671	2556	7.52098				O60826	CCDC22	Coiled-coil domain-containing protein 22	CCD22_HUMAN	149.675	2678	7.22569
O60828	PQBP1	Polyglutamine-binding protein 1	1160.04	889	10.18				O60828	PQBP1	Polyglutamine-binding protein 1	PQBP1_HUMAN	1575.18	625	10.6213
O60831	PRAF2	PRA1 family protein 2	440.735	1702	8.78377				O60831	PRAF2	PRA1 family protein 2	PRAF2_HUMAN	500.48	1479	8.96717
O60832	DKC1	H/ACA ribonucleoprotein complex subunit DKC1	801.651	1142	9.64683				O60832	DKC1	H/ACA ribonucleoprotein complex subunit DKC1	DKC1_HUMAN	636.044	1215	9.31298
O60841	EIF5B	Eukaryotic translation initiation factor 5B	1320.88	808	10.3673				O60841	EIF5B	Eukaryotic translation initiation factor 5B	IF2P_HUMAN	1597.86	616	10.6419
O60869	EDF1	Endothelial differentiation-related factor 1	2913.26	391	11.5084				O60869	EDF1	Endothelial differentiation-related factor 1	EDF1_HUMAN	1838.05	545	10.844
O60884	DNAJA2	DnaJ homolog subfamily A member 2	1032.32	960	10.0117				O60884	DNAJA2	DnaJ homolog subfamily A member 2	DNJA2_HUMAN	1457.79	667	10.5096
O60885	BRD4	Bromodomain-containing protein 4	220.915	2401	7.78735				O60885	BRD4	Bromodomain-containing protein 4	BRD4_HUMAN	238.574	2258	7.89829
O60888	CUTA	Protein CutA	7854.95	114	12.9394				O60888	CUTA	Protein CutA	CUTA_HUMAN	4158.48	229	12.0218
O60925	PFDN1	Prefoldin subunit 1	1123.71	903	10.1341				O60925	PFDN1	Prefoldin subunit 1	PFD1_HUMAN	440.107	1587	8.78171
O60934	NBN	Nibrin	173.155	2604	7.43592				O60934	NBN	Nibrin	NBN_HUMAN	480.073	1516	8.90711
O60936	NOL3	Nucleolar protein 3	1	3167.5	0				O60936	NOL3	Nucleolar protein 3	NOL3_HUMAN	10840.6	64	13.4042
O75044	SRGAP2	SLIT-ROBO Rho GTPase-activating protein 2	96.3179	2937	6.58973				O75044	SRGAP2	SLIT-ROBO Rho GTPase-activating protein 2	SRGP2_HUMAN	154.682	2652	7.27316
O75083	WDR1	WD repeat-containing protein 1	12305.1	68	13.587				O75083	WDR1	WD repeat-containing protein 1	WDR1_HUMAN	4956.42	181	12.2751
O75116	ROCK2	Rho-associated protein kinase 2	354.63	1944	8.47017				O75116	ROCK2	Rho-associated protein kinase 2	ROCK2_HUMAN	407.423	1654	8.67039
O75122	CLASP2	CLIP-associating protein 2	121.632	2833	6.92638				O75122	CLASP2	CLIP-associating protein 2	CLAP2_HUMAN	114.108	2839	6.83426
O75131	CPNE3	Copine-3	793.371	1153	9.63185				O75131	CPNE3	Copine-3	CPNE3_HUMAN	996.28	891	9.96041
O75146	HIP1R	Huntingtin-interacting protein 1-related protein	80.098	3008	6.32369				O75146	HIP1R	Huntingtin-interacting protein 1-related protein	HIP1R_HUMAN	123.608	2793	6.94963
O75150	RNF40	E3 ubiquitin-protein ligase BRE1B	194.811	2506	7.60593				O75150	RNF40	E3 ubiquitin-protein ligase BRE1B	BRE1B_HUMAN	139.095	2733	7.11992
O75152	ZC3H11A	Zinc finger CCCH domain-containing protein 11A	350.353	1963	8.45267				O75152	ZC3H11A	Zinc finger CCCH domain-containing protein 11A	ZC11A_HUMAN	132.353	2759	7.04825
O75153	CLUH	Clustered mitochondria protein homolog	733.394	1211	9.51845				O75153	CLUH	Clustered mitochondria protein homolog	CLU_HUMAN	736.446	1099	9.52444
O75165	DNAJC13	DnaJ homolog subfamily C member 13	135.566	2766	7.08286				O75165	DNAJC13	DnaJ homolog subfamily C member 13	DJC13_HUMAN	74.1206	3024	6.2118
O75179	ANKRD17	Ankyrin repeat domain-containing protein 17	209.928	2452	7.71375				O75179	ANKRD17	Ankyrin repeat domain-containing protein 17	ANR17_HUMAN	222.353	2328	7.79671
O75190	DNAJB6	DnaJ homolog subfamily B member 6	1080.01	932	10.0768				O75190	DNAJB6	DnaJ homolog subfamily B member 6	DNJB6_HUMAN	489.605	1496	8.93547
O75223	GGCT	Gamma-glutamylcyclotransferase	812.952	1135	9.66703				O75223	GGCT	Gamma-glutamylcyclotransferase	GGCT_HUMAN	744.378	1092	9.53989
O75312	ZPR1	Zinc finger protein ZPR1	881.05	1066	9.78308				O75312	ZPR1	Zinc finger protein ZPR1	ZPR1_HUMAN	673.882	1168	9.39635
O75340	PDCD6	Programmed cell death protein 6	456.928	1661	8.83582				O75340	PDCD6	Programmed cell death protein 6	PDCD6_HUMAN	143.431	2707	7.16421
O75347	TBCA	Tubulin-specific chaperone A	2656.95	432	11.3756				O75347	TBCA	Tubulin-specific chaperone A	TBCA_HUMAN	2267.32	452	11.1468
O75348	ATP6V1G1	V-type proton ATPase subunit G 1	513.555	1545	9.00437				O75348	ATP6V1G1	V-type proton ATPase subunit G 1	VATG1_HUMAN	349.834	1826	8.45053
O75352	MPDU1	Mannose-P-dolichol utilization defect 1 protein	242.731	2324	7.92322				O75352	MPDU1	Mannose-P-dolichol utilization defect 1 protein	MPU1_HUMAN	133.579	2754	7.06155
O75367	H2AFY	Core histone macro-H2A.1	4911.54	215	12.262				O75367	H2AFY	Core histone macro-H2A.1	H2AY_HUMAN	3563.26	277	11.799
O75368	SH3BGRL	SH3 domain-binding glutamic acid-rich-like protein	764.552	1169	9.57847				O75368	SH3BGRL	SH3 domain-binding glutamic acid-rich-like protein	SH3L1_HUMAN	977.775	902	9.93336
O75369	FLNB	Filamin-B	12670.4	61	13.6292				O75369	FLNB	Filamin-B	FLNB_HUMAN	10892.8	63	13.4111
O75380	NDUFS6	NADH dehydrogenase [ubiquinone] iron-sulfur protein 6, mitochondrial	148.374	2703	7.2131				O75380	NDUFS6	NADH dehydrogenase [ubiquinone] iron-sulfur protein 6, mitochondrial	NDUS6_HUMAN	98.2704	2915	6.61868
O75381	PEX14	Peroxisomal membrane protein PEX14	387.449	1844	8.59786				O75381	PEX14	Peroxisomal membrane protein PEX14	PEX14_HUMAN	192.205	2481	7.5865
O75390	CS	Citrate synthase, mitochondrial	2268.56	501	11.1476				O75390	CS	Citrate synthase, mitochondrial	CISY_HUMAN	1668.43	593	10.7043
O75396	SEC22B	Vesicle-trafficking protein SEC22b	517.63	1541	9.01578				O75396	SEC22B	Vesicle-trafficking protein SEC22b	SC22B_HUMAN	402.357	1666	8.65233
O75400	PRPF40A	Pre-mRNA-processing factor 40 homolog A	860.113	1087	9.74838				O75400	PRPF40A	Pre-mRNA-processing factor 40 homolog A	PR40A_HUMAN	1012.86	886	9.98422
O75410	TACC1	Transforming acidic coiled-coil-containing protein 1	336.118	2013	8.39282				O75410	TACC1	Transforming acidic coiled-coil-containing protein 1	TACC1_HUMAN	405.877	1656	8.6649
O75431	MTX2	Metaxin-2	196.153	2497	7.61583				O75431	MTX2	Metaxin-2	MTX2_HUMAN	174.251	2561	7.44502
O75436	VPS26A	Vacuolar protein sorting-associated protein 26A	412.255	1779	8.68739				O75436	VPS26A	Vacuolar protein sorting-associated protein 26A	VP26A_HUMAN	1464.41	662	10.5161
O75439	PMPCB	Mitochondrial-processing peptidase subunit beta	333.322	2022	8.38077				O75439	PMPCB	Mitochondrial-processing peptidase subunit beta	MPPB_HUMAN	366.701	1774	8.51846
O75475	PSIP1	PC4 and SFRS1-interacting protein	282.31	2180	8.14114				O75475	PSIP1	PC4 and SFRS1-interacting protein	PSIP1_HUMAN	295.296	2018	8.20602
O75477	ERLIN1	Erlin-1	568.235	1448	9.15034				O75477	ERLIN1	Erlin-1	ERLN1_HUMAN	537.764	1394	9.07083
O75489	NDUFS3	NADH dehydrogenase [ubiquinone] iron-sulfur protein 3, mitochondrial	152.976	2685	7.25717				O75489	NDUFS3	NADH dehydrogenase [ubiquinone] iron-sulfur protein 3, mitochondrial	NDUS3_HUMAN	155.697	2646	7.2826
O75494	SRSF10	Serine/arginine-rich splicing factor 10	579.294	1427	9.17815				O75494	SRSF10	Serine/arginine-rich splicing factor 10	SRS10_HUMAN	728.762	1110	9.5093
O75506	HSBP1	Heat shock factor-binding protein 1	52.5544	3088	5.71574				O75506	HSBP1	Heat shock factor-binding protein 1	HSBP1_HUMAN	100.898	2902	6.65675
O75521	ECI2	Enoyl-CoA delta isomerase 2, mitochondrial	380.252	1859	8.57081				O75521	ECI2	Enoyl-CoA delta isomerase 2, mitochondrial	ECI2_HUMAN	234.155	2284	7.87132
O75530	EED	Polycomb protein EED	243.758	2319	7.9293				O75530	EED	Polycomb protein EED	EED_HUMAN	129.377	2772	7.01543
O75531	BANF1	Barrier-to-autointegration factor	3788.54	295	11.8874				O75531	BANF1	Barrier-to-autointegration factor	BAF_HUMAN	6440.21	130	12.6529
O75533	SF3B1	Splicing factor 3B subunit 1	1965.5	578	10.9407				O75533	SF3B1	Splicing factor 3B subunit 1	SF3B1_HUMAN	1231.72	763	10.2665
O75534	CSDE1	Cold shock domain-containing protein E1	1926.24	591	10.9116				O75534	CSDE1	Cold shock domain-containing protein E1	CSDE1_HUMAN	1677.1	590	10.7118
O75592	MYCBP2	E3 ubiquitin-protein ligase MYCBP2	14.4562	3151	3.85362				O75592	MYCBP2	E3 ubiquitin-protein ligase MYCBP2	MYCB2_HUMAN	275.853	2098	8.10776
O75607	NPM3	Nucleoplasmin-3	740.468	1201	9.53229				O75607	NPM3	Nucleoplasmin-3	NPM3_HUMAN	929.322	935	9.86003
O75608	LYPLA1	Acyl-protein thioesterase 1	438.847	1707	8.77757				O75608	LYPLA1	Acyl-protein thioesterase 1	LYPA1_HUMAN	598.915	1275	9.22621
O75616	ERAL1	GTPase Era, mitochondrial	92.0563	2954	6.52444				O75616	ERAL1	GTPase Era, mitochondrial	ERAL1_HUMAN	155.587	2647	7.28158
O75643	SNRNP200	U5 small nuclear ribonucleoprotein 200 kDa helicase	1175.67	878	10.1993				O75643	SNRNP200	U5 small nuclear ribonucleoprotein 200 kDa helicase	U520_HUMAN	1012.88	885	9.98425
O75663	TIPRL	TIP41-like protein	236.437	2352	7.88531				O75663	TIPRL	TIP41-like protein	TIPRL_HUMAN	565.288	1338	9.14284
O75674	TOM1L1	TOM1-like protein 1	278.373	2193	8.12088				O75674	TOM1L1	TOM1-like protein 1	TM1L1_HUMAN	225.442	2315	7.81661
O75676	RPS6KA4	Ribosomal protein S6 kinase alpha-4	246.158	2312	7.94344				O75676	RPS6KA4	Ribosomal protein S6 kinase alpha-4	KS6A4_HUMAN	324.987	1916	8.34424
O75683	SURF6	Surfeit locus protein 6	259.09	2262	8.01731				O75683	SURF6	Surfeit locus protein 6	SURF6_HUMAN	332.864	1887	8.37879
O75688	PPM1B	Protein phosphatase 1B	82.6392	2998	6.36875				O75688	PPM1B	Protein phosphatase 1B	PPM1B_HUMAN	154.853	2650	7.27475
O75694	NUP155	Nuclear pore complex protein Nup155	514.375	1543	9.00668				O75694	NUP155	Nuclear pore complex protein Nup155	NU155_HUMAN	375.626	1750	8.55315
O75695	RP2	Protein XRP2	218.46	2412	7.77122				O75695	RP2	Protein XRP2	XRP2_HUMAN	281.118	2074	8.13503
O75717	WDHD1	WD repeat and HMG-box DNA-binding protein 1	361.732	1916	8.49878				O75717	WDHD1	WD repeat and HMG-box DNA-binding protein 1	WDHD1_HUMAN	565.565	1335	9.14355
O75718	CRTAP	Cartilage-associated protein	673.787	1299	9.39615				O75718	CRTAP	Cartilage-associated protein	CRTAP_HUMAN	624.992	1227	9.28769
O75792	RNASEH2A	Ribonuclease H2 subunit A	172.884	2605	7.43366				O75792	RNASEH2A	Ribonuclease H2 subunit A	RNH2A_HUMAN	260.071	2159	8.02276
O75794	CDC123	Cell division cycle protein 123 homolog	565.11	1455	9.14239				O75794	CDC123	Cell division cycle protein 123 homolog	CD123_HUMAN	423.614	1625	8.7266
O75815	BCAR3	Breast cancer anti-estrogen resistance protein 3	149.835	2693	7.22723				O75815	BCAR3	Breast cancer anti-estrogen resistance protein 3	BCAR3_HUMAN	169.548	2583	7.40555
O75821	EIF3G	Eukaryotic translation initiation factor 3 subunit G	1528.88	716	10.5783				O75821	EIF3G	Eukaryotic translation initiation factor 3 subunit G	EIF3G_HUMAN	1439.31	672	10.4912
O75822	EIF3J	Eukaryotic translation initiation factor 3 subunit J	1536.69	711	10.5856				O75822	EIF3J	Eukaryotic translation initiation factor 3 subunit J	EIF3J_HUMAN	1761.34	575	10.7825
O75828	CBR3	Carbonyl reductase [NADPH] 3	384.123	1850	8.58542				O75828	CBR3	Carbonyl reductase [NADPH] 3	CBR3_HUMAN	570.45	1329	9.15596
O75832	PSMD10	26S proteasome non-ATPase regulatory subunit 10	156.132	2674	7.28662				O75832	PSMD10	26S proteasome non-ATPase regulatory subunit 10	PSD10_HUMAN	233.255	2290	7.86576
O75843	AP1G2	AP-1 complex subunit gamma-like 2	310.763	2094	8.27967				O75843	AP1G2	AP-1 complex subunit gamma-like 2	AP1G2_HUMAN	251.984	2193	7.97719
O75844	ZMPSTE24	CAAX prenyl protease 1 homolog	235.854	2354	7.88175				O75844	ZMPSTE24	CAAX prenyl protease 1 homolog	FACE1_HUMAN	534.773	1405	9.06278
O75874	IDH1	Isocitrate dehydrogenase [NADP] cytoplasmic	1221.53	853	10.2545				O75874	IDH1	Isocitrate dehydrogenase [NADP] cytoplasmic	IDHC_HUMAN	734.961	1100	9.52152
O75884	RBBP9	Putative hydrolase RBBP9	714.942	1241	9.48168				O75884	RBBP9	Putative hydrolase RBBP9	RBBP9_HUMAN	709.053	1129	9.46975
O75886	STAM2	Signal transducing adapter molecule 2	44.6645	3106	5.48106				O75886	STAM2	Signal transducing adapter molecule 2	STAM2_HUMAN	275.183	2099	8.10425
O75934	BCAS2	Pre-mRNA-splicing factor SPF27	675.383	1297	9.39956				O75934	BCAS2	Pre-mRNA-splicing factor SPF27	SPF27_HUMAN	147.373	2695	7.20333
O75935	DCTN3	Dynactin subunit 3	1045.4	952	10.0298				O75935	DCTN3	Dynactin subunit 3	DCTN3_HUMAN	796.634	1036	9.63777
O75937	DNAJC8	DnaJ homolog subfamily C member 8	976.892	997	9.93205				O75937	DNAJC8	DnaJ homolog subfamily C member 8	DNJC8_HUMAN	917.298	941	9.84125
O75940	SMNDC1	Survival of motor neuron-related-splicing factor 30	321.273	2060	8.32766				O75940	SMNDC1	Survival of motor neuron-related-splicing factor 30	SPF30_HUMAN	311.09	1968	8.28119
O75947	ATP5PD	ATP synthase subunit d, mitochondrial	927.574	1024	9.85732				O75947	ATP5PD	ATP synthase subunit d, mitochondrial	ATP5H_HUMAN	681.958	1161	9.41354
O75955	FLOT1	Flotillin-1	264.27	2240	8.04587				O75955	FLOT1	Flotillin-1	FLOT1_HUMAN	364.501	1782	8.50978
O75964	ATP5MG	ATP synthase subunit g, mitochondrial	1382.99	782	10.4336				O75964	ATP5MG	ATP synthase subunit g, mitochondrial	ATP5L_HUMAN	728.698	1111	9.50918
O75976	CPD	Carboxypeptidase D	292.33	2147	8.19145				O75976	CPD	Carboxypeptidase D	CBPD_HUMAN	159.596	2625	7.31828
O76003	GLRX3	Glutaredoxin-3	2838.53	402	11.4709				O76003	GLRX3	Glutaredoxin-3	GLRX3_HUMAN	3593.22	274	11.8111
O76021	RSL1D1	Ribosomal L1 domain-containing protein 1	1080.91	930	10.078				O76021	RSL1D1	Ribosomal L1 domain-containing protein 1	RL1D1_HUMAN	911.148	947	9.83154
O76024	WFS1	Wolframin	91.964	2955	6.523				O76024	WFS1	Wolframin	WFS1_HUMAN	210.961	2379	7.72083
O76031	CLPX	ATP-dependent Clp protease ATP-binding subunit clpX-like, mitochondrial	214.314	2430	7.74358				O76031	CLPX	ATP-dependent Clp protease ATP-binding subunit clpX-like, mitochondrial	CLPX_HUMAN	57.2925	3087	5.84028
O76071	CIAO1	Probable cytosolic iron-sulfur protein assembly protein CIAO1	100.376	2916	6.64927				O76071	CIAO1	Probable cytosolic iron-sulfur protein assembly protein CIAO1	CIAO1_HUMAN	455.142	1565	8.83017
O76094	SRP72	Signal recognition particle subunit SRP72	1117.84	905	10.1265				O76094	SRP72	Signal recognition particle subunit SRP72	SRP72_HUMAN	1186.15	791	10.2121
O94760	DDAH1	N(G),N(G)-dimethylarginine dimethylaminohydrolase 1	608.514	1387	9.24915				O94760	DDAH1	N(G),N(G)-dimethylarginine dimethylaminohydrolase 1	DDAH1_HUMAN	1100.52	839	10.104
O94776	MTA2	Metastasis-associated protein MTA2	887.769	1062	9.79404				O94776	MTA2	Metastasis-associated protein MTA2	MTA2_HUMAN	1106.59	833	10.1119
O94804	STK10	Serine/threonine-protein kinase 10	997.207	980	9.96175				O94804	STK10	Serine/threonine-protein kinase 10	STK10_HUMAN	340.037	1858	8.40955
O94826	TOMM70	Mitochondrial import receptor subunit TOM70	430.877	1728	8.75113				O94826	TOMM70	Mitochondrial import receptor subunit TOM70	TOM70_HUMAN	541.235	1384	9.08011
O94842	TOX4	TOX high mobility group box family member 4	150.491	2691	7.23354				O94842	TOX4	TOX high mobility group box family member 4	TOX4_HUMAN	189.55	2492	7.56644
O94851	MICAL2	[F-actin]-monooxygenase MICAL2	95.165	2939	6.57236				O94851	MICAL2	[F-actin]-monooxygenase MICAL2	MICA2_HUMAN	198.067	2450	7.62984
O94855	SEC24D	Protein transport protein Sec24D	307.161	2103	8.26285				O94855	SEC24D	Protein transport protein Sec24D	SC24D_HUMAN	279.165	2080	8.12498
O94874	UFL1	E3 UFM1-protein ligase 1	114.725	2860	6.84203				O94874	UFL1	E3 UFM1-protein ligase 1	UFL1_HUMAN	142.926	2711	7.15913
O94888	UBXN7	UBX domain-containing protein 7	115.354	2858	6.84992				O94888	UBXN7	UBX domain-containing protein 7	UBXN7_HUMAN	247.89	2210	7.95356
O94901	SUN1	SUN domain-containing protein 1	18.8902	3146	4.23957				O94901	SUN1	SUN domain-containing protein 1	SUN1_HUMAN	80.538	2998	6.3316
O94903	PLPBP	Pyridoxal phosphate homeostasis protein	332.579	2027	8.37755				O94903	PLPBP	Pyridoxal phosphate homeostasis protein	PLPHP_HUMAN	319.224	1934	8.31843
O94905	ERLIN2	Erlin-2	629.304	1356	9.29761				O94905	ERLIN2	Erlin-2	ERLN2_HUMAN	734.933	1101	9.52147
O94906	PRPF6	Pre-mRNA-processing factor 6	924.893	1031	9.85314				O94906	PRPF6	Pre-mRNA-processing factor 6	PRP6_HUMAN	579.767	1310	9.17933
O94910	ADGRL1	Adhesion G protein-coupled receptor L1	76.9616	3017	6.26607				O94910	ADGRL1	Adhesion G protein-coupled receptor L1	AGRL1_HUMAN	148.892	2685	7.21812
O94915	FRYL	Protein furry homolog-like	164.188	2646	7.35921				O94915	FRYL	Protein furry homolog-like	FRYL_HUMAN	69.5287	3049	6.11954
O94925	GLS	Glutaminase kidney isoform, mitochondrial	700.646	1262	9.45254				O94925	GLS	Glutaminase kidney isoform, mitochondrial	GLSK_HUMAN	627.927	1225	9.29445
O94966	USP19	Ubiquitin carboxyl-terminal hydrolase 19	149.652	2695	7.22547				O94966	USP19	Ubiquitin carboxyl-terminal hydrolase 19	UBP19_HUMAN	15.4234	3170	3.94705
O94973	AP2A2	AP-2 complex subunit alpha-2	426.909	1738	8.73778				O94973	AP2A2	AP-2 complex subunit alpha-2	AP2A2_HUMAN	343.173	1845	8.42279
O94979	SEC31A	Protein transport protein Sec31A	1299.03	818	10.3432				O94979	SEC31A	Protein transport protein Sec31A	SC31A_HUMAN	1099.41	840	10.1025
O94992	HEXIM1	Protein HEXIM1	656.083	1323	9.35774				O94992	HEXIM1	Protein HEXIM1	HEXI1_HUMAN	268.077	2125	8.0665
O95104	SCAF4	Splicing factor, arginine/serine-rich 15	205.273	2466	7.6814				O95104	SCAF4	Splicing factor, arginine/serine-rich 15	SFR15_HUMAN	86.8285	2967	6.4401
O95159	ZFPL1	Zinc finger protein-like 1	455.912	1665	8.83261				O95159	ZFPL1	Zinc finger protein-like 1	ZFPL1_HUMAN	471.636	1534	8.88153
O95163	ELP1	Elongator complex protein 1	129.447	2795	7.01622				O95163	ELP1	Elongator complex protein 1	ELP1_HUMAN	238.951	2254	7.90057
O95168	NDUFB4	NADH dehydrogenase [ubiquinone] 1 beta subcomplex subunit 4	458.675	1654	8.84133				O95168	NDUFB4	NADH dehydrogenase [ubiquinone] 1 beta subcomplex subunit 4	NDUB4_HUMAN	240.572	2244	7.91032
O95182	NDUFA7	NADH dehydrogenase [ubiquinone] 1 alpha subcomplex subunit 7	61.92	3060	5.95233				O95182	NDUFA7	NADH dehydrogenase [ubiquinone] 1 alpha subcomplex subunit 7	NDUA7_HUMAN	244.936	2222	7.93626
O95197	RTN3	Reticulon-3	1547.46	707	10.5957				O95197	RTN3	Reticulon-3	RTN3_HUMAN	983.987	899	9.9425
O95202	LETM1	Mitochondrial proton/calcium exchanger protein	244.893	2316	7.93601				O95202	LETM1	Mitochondrial proton/calcium exchanger protein	LETM1_HUMAN	244.792	2224	7.93541
O95218	ZRANB2	Zinc finger Ran-binding domain-containing protein 2	368.706	1896	8.52633				O95218	ZRANB2	Zinc finger Ran-binding domain-containing protein 2	ZRAB2_HUMAN	224.964	2321	7.81355
O95219	SNX4	Sorting nexin-4	117.464	2849	6.87608				O95219	SNX4	Sorting nexin-4	SNX4_HUMAN	83.9003	2980	6.3906
O95232	LUC7L3	Luc7-like protein 3	135.627	2764	7.0835				O95232	LUC7L3	Luc7-like protein 3	LC7L3_HUMAN	261.755	2151	8.03207
O95235	KIF20A	Kinesin-like protein KIF20A	39.2702	3116	5.29536				O95235	KIF20A	Kinesin-like protein KIF20A	KI20A_HUMAN	65.2736	3065	6.02843
O95239	KIF4A	Chromosome-associated kinesin KIF4A	420.742	1755	8.71679				O95239	KIF4A	Chromosome-associated kinesin KIF4A	KIF4A_HUMAN	474.798	1524	8.89117
O95292	VAPB	Vesicle-associated membrane protein-associated protein B/C	983.986	994	9.94249				O95292	VAPB	Vesicle-associated membrane protein-associated protein B/C	VAPB_HUMAN	593.051	1288	9.21201
O95295	SNAPIN	SNARE-associated protein Snapin	131.376	2788	7.03755				O95295	SNAPIN	SNARE-associated protein Snapin	SNAPN_HUMAN	189.567	2491	7.56657
O95302	FKBP9	Peptidyl-prolyl cis-trans isomerase FKBP9	468.085	1631	8.87063				O95302	FKBP9	Peptidyl-prolyl cis-trans isomerase FKBP9	FKBP9_HUMAN	346.217	1835	8.43553
O95319	CELF2	CUGBP Elav-like family member 2	499.541	1569	8.96446				O95319	CELF2	CUGBP Elav-like family member 2	CELF2_HUMAN	472.451	1530	8.88402
O95336	PGLS	6-phosphogluconolactonase	1857.43	617	10.8591				O95336	PGLS	6-phosphogluconolactonase	6PGL_HUMAN	2467.95	406	11.2691
O95340	PAPSS2	Bifunctional 3'-phosphoadenosine 5'-phosphosulfate synthase 2	907.671	1051	9.82603				O95340	PAPSS2	Bifunctional 3'-phosphoadenosine 5'-phosphosulfate synthase 2	PAPS2_HUMAN	547.445	1373	9.09657
O95347	SMC2	Structural maintenance of chromosomes protein 2	1395.61	775	10.4467				O95347	SMC2	Structural maintenance of chromosomes protein 2	SMC2_HUMAN	1624.48	608	10.6658
O95372	LYPLA2	Acyl-protein thioesterase 2	345.602	1979	8.43297				O95372	LYPLA2	Acyl-protein thioesterase 2	LYPA2_HUMAN	342.181	1848	8.41861
O95373	IPO7	Importin-7	2912.52	392	11.5081				O95373	IPO7	Importin-7	IPO7_HUMAN	2780.52	355	11.4411
O95376	ARIH2	E3 ubiquitin-protein ligase ARIH2	75.3425	3021	6.23539				O95376	ARIH2	E3 ubiquitin-protein ligase ARIH2	ARI2_HUMAN	314.82	1955	8.29838
O95391	SLU7	Pre-mRNA-splicing factor SLU7	54.5694	3082	5.77002				O95391	SLU7	Pre-mRNA-splicing factor SLU7	SLU7_HUMAN	64.4958	3066	6.01113
O95394	PGM3	Phosphoacetylglucosamine mutase	433.955	1720	8.7614				O95394	PGM3	Phosphoacetylglucosamine mutase	AGM1_HUMAN	673.557	1170	9.39566
O95400	CD2BP2	CD2 antigen cytoplasmic tail-binding protein 2	472.832	1626	8.88518				O95400	CD2BP2	CD2 antigen cytoplasmic tail-binding protein 2	CD2B2_HUMAN	473.914	1526	8.88848
O95425	SVIL	Supervillin	49.6327	3095	5.63322				O95425	SVIL	Supervillin	SVIL_HUMAN	109.248	2861	6.77146
O95433	AHSA1	Activator of 90 kDa heat shock protein ATPase homolog 1	1481.78	737	10.5331				O95433	AHSA1	Activator of 90 kDa heat shock protein ATPase homolog 1	AHSA1_HUMAN	1232.01	761	10.2668
O95456	PSMG1	Proteasome assembly chaperone 1	710.607	1248	9.47291				O95456	PSMG1	Proteasome assembly chaperone 1	PSMG1_HUMAN	413.812	1637	8.69283
O95466	FMNL1	Formin-like protein 1	462.041	1637	8.85188				O95466	FMNL1	Formin-like protein 1	FMNL1_HUMAN	327.528	1904	8.35547
O95478	NSA2	Ribosome biogenesis protein NSA2 homolog	537.695	1514	9.07064				O95478	NSA2	Ribosome biogenesis protein NSA2 homolog	NSA2_HUMAN	200.355	2434	7.64642
O95486	SEC24A	Protein transport protein Sec24A	406.32	1795	8.66647				O95486	SEC24A	Protein transport protein Sec24A	SC24A_HUMAN	417.187	1630	8.70455
O95487	SEC24B	Protein transport protein Sec24B	365.811	1903	8.51496				O95487	SEC24B	Protein transport protein Sec24B	SC24B_HUMAN	176.597	2553	7.46431
O95571	ETHE1	Persulfide dioxygenase ETHE1, mitochondrial	288.689	2159	8.17337				O95571	ETHE1	Persulfide dioxygenase ETHE1, mitochondrial	ETHE1_HUMAN	400.951	1671	8.64728
O95573	ACSL3	Long-chain-fatty-acid--CoA ligase 3	1099.64	920	10.1028				O95573	ACSL3	Long-chain-fatty-acid--CoA ligase 3	ACSL3_HUMAN	847.327	1001	9.72677
O95602	POLR1A	DNA-directed RNA polymerase I subunit RPA1	145.03	2718	7.18021				O95602	POLR1A	DNA-directed RNA polymerase I subunit RPA1	RPA1_HUMAN	83.1735	2984	6.37805
O95630	STAMBP	STAM-binding protein	493.477	1581	8.94684				O95630	STAMBP	STAM-binding protein	STABP_HUMAN	30.9812	3153	4.95332
O95674	CDS2	Phosphatidate cytidylyltransferase 2	154.406	2682	7.27059				O95674	CDS2	Phosphatidate cytidylyltransferase 2	CDS2_HUMAN	76.8237	3012	6.26348
O95707	POP4	Ribonuclease P protein subunit p29	148.306	2704	7.21243				O95707	POP4	Ribonuclease P protein subunit p29	RPP29_HUMAN	194.907	2469	7.60664
O95721	SNAP29	Synaptosomal-associated protein 29	372.522	1879	8.54118				O95721	SNAP29	Synaptosomal-associated protein 29	SNP29_HUMAN	484.149	1504	8.91931
O95747	OXSR1	Serine/threonine-protein kinase OSR1	1322.14	805	10.3687				O95747	OXSR1	Serine/threonine-protein kinase OSR1	OXSR1_HUMAN	790.54	1041	9.6267
O95757	HSPA4L	Heat shock 70 kDa protein 4L	980.667	996	9.93762				O95757	HSPA4L	Heat shock 70 kDa protein 4L	HS74L_HUMAN	1285.84	743	10.3285
O95758	PTBP3	Polypyrimidine tract-binding protein 3	639.115	1340	9.31993				O95758	PTBP3	Polypyrimidine tract-binding protein 3	PTBP3_HUMAN	195.942	2461	7.61428
O95777	LSM8	U6 snRNA-associated Sm-like protein LSm8	1290.25	824	10.3334				O95777	LSM8	U6 snRNA-associated Sm-like protein LSm8	LSM8_HUMAN	1878.28	528	10.8752
O95782	AP2A1	AP-2 complex subunit alpha-1	1042.5	953	10.0258				O95782	AP2A1	AP-2 complex subunit alpha-1	AP2A1_HUMAN	1015.94	884	9.98859
O95786	DDX58	Probable ATP-dependent RNA helicase DDX58	105.341	2898	6.71892				O95786	DDX58	Probable ATP-dependent RNA helicase DDX58	DDX58_HUMAN	148.923	2684	7.21842
O95793	STAU1	Double-stranded RNA-binding protein Staufen homolog 1	271.259	2214	8.08353				O95793	STAU1	Double-stranded RNA-binding protein Staufen homolog 1	STAU1_HUMAN	403.313	1663	8.65576
O95801	TTC4	Tetratricopeptide repeat protein 4	80.7771	3005	6.33587				O95801	TTC4	Tetratricopeptide repeat protein 4	TTC4_HUMAN	357.022	1808	8.47987
O95810	CAVIN2	Caveolae-associated protein 2	402.159	1807	8.65162				O95810	CAVIN2	Caveolae-associated protein 2	CAVN2_HUMAN	312.718	1965	8.28872
O95816	BAG2	BAG family molecular chaperone regulator 2	2459.83	460	11.2643				O95816	BAG2	BAG family molecular chaperone regulator 2	BAG2_HUMAN	2012.33	504	10.9747
O95817	BAG3	BAG family molecular chaperone regulator 3	990.307	989	9.95173				O95817	BAG3	BAG family molecular chaperone regulator 3	BAG3_HUMAN	611.441	1249	9.25607
O95819	MAP4K4	Mitogen-activated protein kinase kinase kinase kinase 4	19562	37	14.2558				O95819	MAP4K4	Mitogen-activated protein kinase kinase kinase kinase 4	M4K4_HUMAN	383.301	1724	8.58233
O95831	AIFM1	Apoptosis-inducing factor 1, mitochondrial	611.681	1379	9.25663				O95831	AIFM1	Apoptosis-inducing factor 1, mitochondrial	AIFM1_HUMAN	562.339	1343	9.1353
O95833	CLIC3	Chloride intracellular channel protein 3	418.932	1762	8.71057				O95833	CLIC3	Chloride intracellular channel protein 3	CLIC3_HUMAN	134.145	2753	7.06765
O95834	EML2	Echinoderm microtubule-associated protein-like 2	82.9244	2997	6.37373				O95834	EML2	Echinoderm microtubule-associated protein-like 2	EMAL2_HUMAN	72.6239	3032	6.18237
O95861	BPNT1	3'(2'),5'-bisphosphate nucleotidase 1	704.508	1257	9.46047				O95861	BPNT1	3'(2'),5'-bisphosphate nucleotidase 1	BPNT1_HUMAN	669.519	1176	9.38698
O95864	FADS2	Acyl-CoA 6-desaturase	486.616	1597	8.92664				O95864	FADS2	Acyl-CoA 6-desaturase	FADS2_HUMAN	305.275	1986	8.25397
O95865	DDAH2	N(G),N(G)-dimethylarginine dimethylaminohydrolase 2	707.111	1255	9.46579				O95865	DDAH2	N(G),N(G)-dimethylarginine dimethylaminohydrolase 2	DDAH2_HUMAN	869.075	981	9.76334
O95881	TXNDC12	Thioredoxin domain-containing protein 12	1416.84	762	10.4685				O95881	TXNDC12	Thioredoxin domain-containing protein 12	TXD12_HUMAN	102.935	2894	6.68559
O95905	ECD	Protein ecdysoneless homolog	422.729	1750	8.72359				O95905	ECD	Protein ecdysoneless homolog	ECD_HUMAN	311.055	1969	8.28103
O95989	NUDT3	Diphosphoinositol polyphosphate phosphohydrolase 1	587.567	1411	9.19861				O95989	NUDT3	Diphosphoinositol polyphosphate phosphohydrolase 1	NUDT3_HUMAN	191.989	2482	7.58488
O96000	NDUFB10	NADH dehydrogenase [ubiquinone] 1 beta subcomplex subunit 10	231.546	2369	7.85515				O96000	NDUFB10	NADH dehydrogenase [ubiquinone] 1 beta subcomplex subunit 10	NDUBA_HUMAN	218.152	2347	7.76919
O96005	CLPTM1	Cleft lip and palate transmembrane protein 1	419.523	1759	8.7126				O96005	CLPTM1	Cleft lip and palate transmembrane protein 1	CLPT1_HUMAN	340.913	1852	8.41326
O96007	MOCS2	Molybdopterin synthase catalytic subunit	170.128	2618	7.41048				O96007	MOCS2	Molybdopterin synthase catalytic subunit	MOC2B_HUMAN	304.942	1988	8.25239
O96008	TOMM40	Mitochondrial import receptor subunit TOM40 homolog	108.566	2885	6.76242				O96008	TOMM40	Mitochondrial import receptor subunit TOM40 homolog	TOM40_HUMAN	152.854	2662	7.25601
O96013	PAK4	Serine/threonine-protein kinase PAK 4	284.048	2172	8.14999				O96013	PAK4	Serine/threonine-protein kinase PAK 4	PAK4_HUMAN	61.4685	3073	5.94177
O96019	ACTL6A	Actin-like protein 6A	1808.46	635	10.8205				O96019	ACTL6A	Actin-like protein 6A	ACL6A_HUMAN	1829.52	550	10.8373
O96033	MOCS2	Molybdopterin synthase sulfur carrier subunit	557.72	1473	9.1234				O96033	MOCS2	Molybdopterin synthase sulfur carrier subunit	MOC2A_HUMAN	671.753	1173	9.39179
P00338	LDHA	L-lactate dehydrogenase A chain	41837.9	11	15.3525				P00338	LDHA	L-lactate dehydrogenase A chain	LDHA_HUMAN	34674.1	11	15.0816
P00367	GLUD1	Glutamate dehydrogenase 1, mitochondrial	1733.21	652	10.7592				P00367	GLUD1	Glutamate dehydrogenase 1, mitochondrial	DHE3_HUMAN	1531.58	639	10.5808
P00374	DHFR	Dihydrofolate reductase	758.982	1177	9.56792				P00374	DHFR	Dihydrofolate reductase	DYR_HUMAN	480.293	1514	8.90777
P00387	CYB5R3	NADH-cytochrome b5 reductase 3	2029.35	564	10.9868				P00387	CYB5R3	NADH-cytochrome b5 reductase 3	NB5R3_HUMAN	589.059	1296	9.20227
P00390	GSR	Glutathione reductase, mitochondrial	430.01	1729	8.74823				P00390	GSR	Glutathione reductase, mitochondrial	GSHR_HUMAN	349.393	1829	8.44871
P00403	MT-CO2	Cytochrome c oxidase subunit 2	975.745	998	9.93036				P00403	MT-CO2	Cytochrome c oxidase subunit 2	COX2_HUMAN	978.518	901	9.93445
P00441	SOD1	Superoxide dismutase [Cu-Zn]	1602.44	693	10.6461				P00441	SOD1	Superoxide dismutase [Cu-Zn]	SODC_HUMAN	1589.05	622	10.6339
P00491	PNP	Purine nucleoside phosphorylase	2247.26	505	11.1339				P00491	PNP	Purine nucleoside phosphorylase	PNPH_HUMAN	1534.31	638	10.5834
P00492	HPRT1	Hypoxanthine-guanine phosphoribosyltransferase	1508.89	728	10.5593				P00492	HPRT1	Hypoxanthine-guanine phosphoribosyltransferase	HPRT_HUMAN	1322.62	725	10.3692
P00505	GOT2	Aspartate aminotransferase, mitochondrial	2336.46	488	11.1901				P00505	GOT2	Aspartate aminotransferase, mitochondrial	AATM_HUMAN	2307.12	446	11.1719
P00533	EGFR	Epidermal growth factor receptor	652.495	1328	9.34982				P00533	EGFR	Epidermal growth factor receptor	EGFR_HUMAN	441.676	1586	8.78684
P00558	PGK1	Phosphoglycerate kinase 1	9244.73	89	13.1744				P00558	PGK1	Phosphoglycerate kinase 1	PGK1_HUMAN	11314.7	58	13.4659
P00568	AK1	Adenylate kinase isoenzyme 1	1766.47	644	10.7867				P00568	AK1	Adenylate kinase isoenzyme 1	KAD1_HUMAN	2174.14	468	11.0862
P00749	PLAU	Urokinase-type plasminogen activator	193.112	2515	7.59329				P00749	PLAU	Urokinase-type plasminogen activator	UROK_HUMAN	243.636	2227	7.92858
P01111	NRAS	GTPase NRas	925.806	1028	9.85457				P01111	NRAS	GTPase NRas	RASN_HUMAN	713.261	1128	9.47829
P01130	LDLR	Low-density lipoprotein receptor	509.598	1553	8.99321				P01130	LDLR	Low-density lipoprotein receptor	LDLR_HUMAN	510.54	1452	8.99588
P01892	HLA-A	HLA class I histocompatibility antigen, A-2 alpha chain	1239.99	844	10.2761				P01892	HLA-A	HLA class I histocompatibility antigen, A-2 alpha chain	1A02_HUMAN	2403.67	422	11.231
P02545	LMNA	Prelamin-A/C	20139.6	35	14.2978				P02545	LMNA	Prelamin-A/C	LMNA_HUMAN	23900.8	20	14.5448
P02649	APOE	Apolipoprotein E	1875.91	614	10.8734				P02649	APOE	Apolipoprotein E	APOE_HUMAN	3900.64	243	11.9295
P02656	APOC3	Apolipoprotein C-III	357.439	1934	8.48155				P02656	APOC3	Apolipoprotein C-III	APOC3_HUMAN	657.642	1190	9.36116
P02765	AHSG	Alpha-2-HS-glycoprotein	815.742	1131	9.67197				P02765	AHSG	Alpha-2-HS-glycoprotein	FETUA_HUMAN	738.532	1096	9.52852
P02768	ALB	Serum albumin	3475.24	333	11.7629				P02768	ALB	Serum albumin	ALBU_HUMAN	2377.62	428	11.2153
P02786	TFRC	Transferrin receptor protein 1	5593.81	181	12.4496				P02786	TFRC	Transferrin receptor protein 1	TFR1_HUMAN	2467.26	407	11.2687
P02788	LTF	Lactotransferrin	682.771	1292	9.41526				P02788	LTF	Lactotransferrin	TRFL_HUMAN	631.873	1221	9.30349
P02795	MT2A	Metallothionein-2	5140.42	202	12.3277				P02795	MT2A	Metallothionein-2	MT2_HUMAN	4368.47	213	12.0929
P04040	CAT	Catalase	624.313	1364	9.28613				P04040	CAT	Catalase	CATA_HUMAN	725.779	1119	9.50339
P04049	RAF1	RAF proto-oncogene serine/threonine-protein kinase	166.55	2634	7.37982				P04049	RAF1	RAF proto-oncogene serine/threonine-protein kinase	RAF1_HUMAN	410.647	1646	8.68175
P04062	GBA	Lysosomal acid glucosylceramidase	345.983	1978	8.43456				P04062	GBA	Lysosomal acid glucosylceramidase	GLCM_HUMAN	436.826	1596	8.77092
P04075	ALDOA	Fructose-bisphosphate aldolase A	3818.33	291	11.8987				P04075	ALDOA	Fructose-bisphosphate aldolase A	ALDOA_HUMAN	2119.49	480	11.0495
P04080	CSTB	Cystatin-B	3692.89	304	11.8505				P04080	CSTB	Cystatin-B	CYTB_HUMAN	2827.72	352	11.4654
P04083	ANXA1	Annexin A1	9091.83	92	13.1504				P04083	ANXA1	Annexin A1	ANXA1_HUMAN	10951.1	62	13.4188
P04114	APOB	Apolipoprotein B-100	2423.5	469	11.2429				P04114	APOB	Apolipoprotein B-100	APOB_HUMAN	2903.82	344	11.5037
P04150	NR3C1	Glucocorticoid receptor	213.21	2437	7.73613				P04150	NR3C1	Glucocorticoid receptor	GCR_HUMAN	199.982	2436	7.64373
P04156	PRNP	Major prion protein	260.555	2255	8.02544				P04156	PRNP	Major prion protein	PRIO_HUMAN	163.954	2608	7.35715
P04179	SOD2	Superoxide dismutase [Mn], mitochondrial	525.49	1534	9.03752				P04179	SOD2	Superoxide dismutase [Mn], mitochondrial	SODM_HUMAN	98.6114	2912	6.62368
P04181	OAT	Ornithine aminotransferase, mitochondrial	1700.6	661	10.7318				P04181	OAT	Ornithine aminotransferase, mitochondrial	OAT_HUMAN	1420.02	678	10.4717
P04183	TK1	Thymidine kinase, cytosolic	333.313	2023	8.38074				P04183	TK1	Thymidine kinase, cytosolic	KITH_HUMAN	264.469	2137	8.04695
P04233	CD74	HLA class II histocompatibility antigen gamma chain	426.925	1737	8.73784				P04233	CD74	HLA class II histocompatibility antigen gamma chain	HG2A_HUMAN	105.076	2887	6.71529
P04264	KRT1	Keratin, type II cytoskeletal 1	198.293	2488	7.63149				P04264	KRT1	Keratin, type II cytoskeletal 1	K2C1_HUMAN	108.644	2867	6.76347
P04406	GAPDH	Glyceraldehyde-3-phosphate dehydrogenase	46017.2	9	15.4899				P04406	GAPDH	Glyceraldehyde-3-phosphate dehydrogenase	G3P_HUMAN	45242.9	6	15.4654
P04632	CAPNS1	Calpain small subunit 1	4888.56	218	12.2552				P04632	CAPNS1	Calpain small subunit 1	CPNS1_HUMAN	4909.02	184	12.2612
P04637	TP53	Cellular tumor antigen p53	574.909	1433	9.16719				P04637	TP53	Cellular tumor antigen p53	P53_HUMAN	350.645	1825	8.45387
P04732	MT1E	Metallothionein-1E	26.5786	3140	4.73219				P04732	MT1E	Metallothionein-1E	MT1E_HUMAN	68.7021	3050	6.10228
P04733	MT1F	Metallothionein-1F	38.093	3120	5.25145				P04733	MT1F	Metallothionein-1F	MT1F_HUMAN	73.9411	3026	6.20831
P04792	HSPB1	Heat shock protein beta-1	4627.12	231	12.1759				P04792	HSPB1	Heat shock protein beta-1	HSPB1_HUMAN	2089.41	485	11.0289
P04818	TYMS	Thymidylate synthase	1755.68	647	10.7778				P04818	TYMS	Thymidylate synthase	TYSY_HUMAN	2105.84	483	11.0402
P04843	RPN1	Dolichyl-diphosphooligosaccharide--protein glycosyltransferase subunit 1	1612.91	690	10.6555				P04843	RPN1	Dolichyl-diphosphooligosaccharide--protein glycosyltransferase subunit 1	RPN1_HUMAN	2012.93	503	10.9751
P04844	RPN2	Dolichyl-diphosphooligosaccharide--protein glycosyltransferase subunit 2	835.954	1105	9.70728				P04844	RPN2	Dolichyl-diphosphooligosaccharide--protein glycosyltransferase subunit 2	RPN2_HUMAN	746.594	1090	9.54418
P04899	GNAI2	Guanine nucleotide-binding protein G(i) subunit alpha-2	1346.12	796	10.3946				P04899	GNAI2	Guanine nucleotide-binding protein G(i) subunit alpha-2	GNAI2_HUMAN	695.012	1143	9.44089
P05023	ATP1A1	Sodium/potassium-transporting ATPase subunit alpha-1	5649.84	177	12.464				P05023	ATP1A1	Sodium/potassium-transporting ATPase subunit alpha-1	AT1A1_HUMAN	3865.85	246	11.9166
P05026	ATP1B1	Sodium/potassium-transporting ATPase subunit beta-1	1351.39	793	10.4002				P05026	ATP1B1	Sodium/potassium-transporting ATPase subunit beta-1	AT1B1_HUMAN	593.276	1287	9.21256
P05067	APP	Amyloid-beta precursor protein	299.824	2126	8.22797				P05067	APP	Amyloid-beta precursor protein	A4_HUMAN	146.608	2696	7.19582
P05091	ALDH2	Aldehyde dehydrogenase, mitochondrial	640.548	1337	9.32316				P05091	ALDH2	Aldehyde dehydrogenase, mitochondrial	ALDH2_HUMAN	716.483	1123	9.48479
P05114	HMGN1	Non-histone chromosomal protein HMG-14	2161.93	527	11.0781				P05114	HMGN1	Non-histone chromosomal protein HMG-14	HMGN1_HUMAN	1630.22	603	10.6709
P05121	SERPINE1	Plasminogen activator inhibitor 1	591.35	1406	9.20787				P05121	SERPINE1	Plasminogen activator inhibitor 1	PAI1_HUMAN	516.39	1439	9.01232
P05141	SLC25A5	ADP/ATP translocase 2	9046.07	94	13.1431				P05141	SLC25A5	ADP/ATP translocase 2	ADT2_HUMAN	1700.98	586	10.7322
P05161	ISG15	Ubiquitin-like protein ISG15	937.282	1018	9.87234				P05161	ISG15	Ubiquitin-like protein ISG15	ISG15_HUMAN	892.758	961	9.80213
P05198	EIF2S1	Eukaryotic translation initiation factor 2 subunit 1	4684	228	12.1935				P05198	EIF2S1	Eukaryotic translation initiation factor 2 subunit 1	IF2A_HUMAN	4848.27	187	12.2433
P05387	RPLP2	60S acidic ribosomal protein P2	8433.82	108	13.042				P05387	RPLP2	60S acidic ribosomal protein P2	RLA2_HUMAN	6171.87	138	12.5915
P05388	RPLP0	60S acidic ribosomal protein P0	7227.75	131	12.8193				P05388	RPLP0	60S acidic ribosomal protein P0	RLA0_HUMAN	4720.3	196	12.2047
P05412	JUN	Transcription factor AP-1	69.9083	3036	6.12739				P05412	JUN	Transcription factor AP-1	JUN_HUMAN	153.92	2658	7.26604
P05455	SSB	Lupus La protein	2882.11	399	11.4929				P05455	SSB	Lupus La protein	LA_HUMAN	2058.97	491	11.0077
P05556	ITGB1	Integrin beta-1	3150.32	368	11.6213				P05556	ITGB1	Integrin beta-1	ITB1_HUMAN	3642.51	263	11.8307
P05783	KRT18	Keratin, type I cytoskeletal 18	13678.8	58	13.7396				P05783	KRT18	Keratin, type I cytoskeletal 18	K1C18_HUMAN	11373	56	13.4733
P05787	KRT8	Keratin, type II cytoskeletal 8	9210.45	90	13.1691				P05787	KRT8	Keratin, type II cytoskeletal 8	K2C8_HUMAN	11711.6	54	13.5157
P06132	UROD	Uroporphyrinogen decarboxylase	1227.67	848	10.2617				P06132	UROD	Uroporphyrinogen decarboxylase	DCUP_HUMAN	757.988	1072	9.56603
P06396	GSN	Gelsolin	1015.01	969	9.98728				P06396	GSN	Gelsolin	GELS_HUMAN	904.907	952	9.82163
P06400	RB1	Retinoblastoma-associated protein	361.323	1919	8.49715				P06400	RB1	Retinoblastoma-associated protein	RB_HUMAN	276.754	2092	8.11246
P06454	PTMA	Prothymosin alpha	24262.1	26	14.5664				P06454	PTMA	Prothymosin alpha	PTMA_HUMAN	22540.9	27	14.4603
P06493	CDK1	Cyclin-dependent kinase 1	2355.07	485	11.2016				P06493	CDK1	Cyclin-dependent kinase 1	CDK1_HUMAN	1794.1	566	10.809
P06576	ATP5F1B	ATP synthase subunit beta, mitochondrial	8800.22	100	13.1033				P06576	ATP5F1B	ATP synthase subunit beta, mitochondrial	ATPB_HUMAN	8832.1	86	13.1085
P06703	S100A6	Protein S100-A6	34561	15	15.0769				P06703	S100A6	Protein S100-A6	S10A6_HUMAN	31923.6	14	14.9623
P06730	EIF4E	Eukaryotic translation initiation factor 4E	2400.73	476	11.2293				P06730	EIF4E	Eukaryotic translation initiation factor 4E	IF4E_HUMAN	1189.72	786	10.2164
P06733	ENO1	Alpha-enolase	20989.7	34	14.3574				P06733	ENO1	Alpha-enolase	ENOA_HUMAN	19226.5	32	14.2308
P06737	PYGL	Glycogen phosphorylase, liver form	1075.27	935	10.0705				P06737	PYGL	Glycogen phosphorylase, liver form	PYGL_HUMAN	3734.47	255	11.8667
P06744	GPI	Glucose-6-phosphate isomerase	5204.36	198	12.3455				P06744	GPI	Glucose-6-phosphate isomerase	G6PI_HUMAN	5821.47	152	12.5072
P06748	NPM1	Nucleophosmin	22945	30	14.4859				P06748	NPM1	Nucleophosmin	NPM_HUMAN	9399.5	77	13.1984
P06753	TPM3	Tropomyosin alpha-3 chain	4578.95	236	12.1608				P06753	TPM3	Tropomyosin alpha-3 chain	TPM3_HUMAN	4017.74	236	11.9722
P06756	ITGAV	Integrin alpha-V	250.477	2294	7.96853				P06756	ITGAV	Integrin alpha-V	ITAV_HUMAN	138.726	2735	7.11609
P07099	EPHX1	Epoxide hydrolase 1	760.676	1174	9.57114				P07099	EPHX1	Epoxide hydrolase 1	HYEP_HUMAN	753.381	1080	9.55724
P07108	DBI	Acyl-CoA-binding protein	760.042	1176	9.56993				P07108	DBI	Acyl-CoA-binding protein	ACBP_HUMAN	389.913	1698	8.60701
P07195	LDHB	L-lactate dehydrogenase B chain	23194.2	29	14.5015				P07195	LDHB	L-lactate dehydrogenase B chain	LDHB_HUMAN	23605.7	22	14.5268
P07199	CENPB	Major centromere autoantigen B	1	3167.5	0				P07199	CENPB	Major centromere autoantigen B	CENPB_HUMAN	157.262	2639	7.29702
P07203	GPX1	Glutathione peroxidase 1	168.782	2625	7.39901				P07203	GPX1	Glutathione peroxidase 1	GPX1_HUMAN	279.045	2082	8.12435
P07237	P4HB	Protein disulfide-isomerase	8026.11	112	12.9705				P07237	P4HB	Protein disulfide-isomerase	PDIA1_HUMAN	8065.12	96	12.9775
P07311	ACYP1	Acylphosphatase-1	104.138	2903	6.70235				P07311	ACYP1	Acylphosphatase-1	ACYP1_HUMAN	61.3052	3074	5.93794
P07339	CTSD	Cathepsin D	2309.05	496	11.1731				P07339	CTSD	Cathepsin D	CATD_HUMAN	4662.15	203	12.1868
P07355	ANXA2	Annexin A2	24606	24	14.5867				P07355	ANXA2	Annexin A2	ANXA2_HUMAN	34577.5	12	15.0775
P07384	CAPN1	Calpain-1 catalytic subunit	1324.67	802	10.3714				P07384	CAPN1	Calpain-1 catalytic subunit	CAN1_HUMAN	1083.31	848	10.0812
P07437	TUBB	Tubulin beta chain	35852.9	13	15.1298				P07437	TUBB	Tubulin beta chain	TBB5_HUMAN	34938.5	10	15.0925
P07602	PSAP	Prosaposin	1267.92	835	10.3082				P07602	PSAP	Prosaposin	SAP_HUMAN	1782.13	568	10.7994
P07686	HEXB	Beta-hexosaminidase subunit beta	226.219	2385	7.82158				P07686	HEXB	Beta-hexosaminidase subunit beta	HEXB_HUMAN	198.103	2449	7.6301
P07737	PFN1	Profilin-1	30385.8	17	14.8911				P07737	PFN1	Profilin-1	PROF1_HUMAN	16388.9	36	14.0004
P07741	APRT	Adenine phosphoribosyltransferase	1399.67	771	10.4509				P07741	APRT	Adenine phosphoribosyltransferase	APT_HUMAN	1938.08	518	10.9204
P07814	EPRS	Bifunctional glutamate/proline--tRNA ligase	3414.25	336	11.7374				P07814	EPRS	Bifunctional glutamate/proline--tRNA ligase	SYEP_HUMAN	3718.21	257	11.8604
P07858	CTSB	Cathepsin B	996.213	982	9.96031				P07858	CTSB	Cathepsin B	CATB_HUMAN	934.357	928	9.86783
P07900	HSP90AA1	Heat shock protein HSP 90-alpha	3590.95	318	11.8101				P07900	HSP90AA1	Heat shock protein HSP 90-alpha	HS90A_HUMAN	16661.4	35	14.0242
P07910	HNRNPC	Heterogeneous nuclear ribonucleoproteins C1/C2	12386.1	67	13.5964				P07910	HNRNPC	Heterogeneous nuclear ribonucleoproteins C1/C2	HNRPC_HUMAN	12149.1	49	13.5686
P07919	UQCRH	Cytochrome b-c1 complex subunit 6, mitochondrial	1207.58	861	10.2379				P07919	UQCRH	Cytochrome b-c1 complex subunit 6, mitochondrial	QCR6_HUMAN	1930.96	520	10.9151
P07942	LAMB1	Laminin subunit beta-1	68.4073	3040	6.09608				P07942	LAMB1	Laminin subunit beta-1	LAMB1_HUMAN	167.913	2590	7.39157
P07954	FH	Fumarate hydratase, mitochondrial	1550.6	704	10.5986				P07954	FH	Fumarate hydratase, mitochondrial	FUMH_HUMAN	538.203	1393	9.07201
P07996	THBS1	Thrombospondin-1	499.274	1571	8.96369				P07996	THBS1	Thrombospondin-1	TSP1_HUMAN	624.257	1231	9.286
P08047	SP1	Transcription factor Sp1	542.401	1503	9.08322				P08047	SP1	Transcription factor Sp1	SP1_HUMAN	349.528	1828	8.44926
P08133	ANXA6	Annexin A6	6904.18	136	12.7533				P08133	ANXA6	Annexin A6	ANXA6_HUMAN	5307.62	168	12.3738
P08134	RHOC	Rho-related GTP-binding protein RhoC	997.642	979	9.96238				P08134	RHOC	Rho-related GTP-binding protein RhoC	RHOC_HUMAN	810.838	1026	9.66327
P08174	CD55	Complement decay-accelerating factor	619.227	1368	9.27432				P08174	CD55	Complement decay-accelerating factor	DAF_HUMAN	798.017	1034	9.64028
P08195	SLC3A2	4F2 cell-surface antigen heavy chain	2177.97	520	11.0888				P08195	SLC3A2	4F2 cell-surface antigen heavy chain	4F2_HUMAN	2417.15	417	11.2391
P08237	PFKM	ATP-dependent 6-phosphofructokinase, muscle type	496.837	1574	8.95663				P08237	PFKM	ATP-dependent 6-phosphofructokinase, muscle type	PFKAM_HUMAN	416.667	1632	8.70275
P08238	HSP90AB1	Heat shock protein HSP 90-beta	54233.9	7	15.7269				P08238	HSP90AB1	Heat shock protein HSP 90-beta	HS90B_HUMAN	27180.8	18	14.7303
P08240	SRPRA	Signal recognition particle receptor subunit alpha	321.788	2056	8.32997				P08240	SRPRA	Signal recognition particle receptor subunit alpha	SRPRA_HUMAN	166.155	2597	7.37638
P08243	ASNS	Asparagine synthetase [glutamine-hydrolyzing]	2357.71	484	11.2032				P08243	ASNS	Asparagine synthetase [glutamine-hydrolyzing]	ASNS_HUMAN	1624.63	606	10.6659
P08397	HMBS	Porphobilinogen deaminase	680.945	1293	9.41139				P08397	HMBS	Porphobilinogen deaminase	HEM3_HUMAN	501.197	1475	8.96923
P08559	PDHA1	Pyruvate dehydrogenase E1 component subunit alpha, somatic form, mitochondrial	375.781	1868	8.55375				P08559	PDHA1	Pyruvate dehydrogenase E1 component subunit alpha, somatic form, mitochondrial	ODPA_HUMAN	279.123	2081	8.12476
P08574	CYC1	Cytochrome c1, heme protein, mitochondrial	499.288	1570	8.96373				P08574	CYC1	Cytochrome c1, heme protein, mitochondrial	CY1_HUMAN	804.124	1029	9.65127
P08579	SNRPB2	U2 small nuclear ribonucleoprotein B''	1321.93	807	10.3684				P08579	SNRPB2	U2 small nuclear ribonucleoprotein B''	RU2B_HUMAN	996.187	892	9.96027
P08621	SNRNP70	U1 small nuclear ribonucleoprotein 70 kDa	2334.31	489	11.1888				P08621	SNRNP70	U1 small nuclear ribonucleoprotein 70 kDa	RU17_HUMAN	2251.79	454	11.1369
P08648	ITGA5	Integrin alpha-5	281.315	2185	8.13604				P08648	ITGA5	Integrin alpha-5	ITA5_HUMAN	237.765	2262	7.89339
P08651	NFIC	Nuclear factor 1 C-type	318.557	2070	8.31541				P08651	NFIC	Nuclear factor 1 C-type	NFIC_HUMAN	653.095	1197	9.35115
P08670	VIM	Vimentin	21994.1	32	14.4248				P08670	VIM	Vimentin	VIME_HUMAN	30522.4	16	14.8976
P08708	RPS17	40S ribosomal protein S17	3190.94	359	11.6398				P08708	RPS17	40S ribosomal protein S17	RS17_HUMAN	2967.96	336	11.5353
P08727	KRT19	Keratin, type I cytoskeletal 19	9558.77	86	13.2226				P08727	KRT19	Keratin, type I cytoskeletal 19	K1C19_HUMAN	10235	66	13.3212
P08729	KRT7	Keratin, type II cytoskeletal 7	8885.27	98	13.1172				P08729	KRT7	Keratin, type II cytoskeletal 7	K2C7_HUMAN	7252.17	111	12.8242
P08754	GNAI3	Guanine nucleotide-binding protein G(k) subunit alpha	481.271	1609	8.9107				P08754	GNAI3	Guanine nucleotide-binding protein G(k) subunit alpha	GNAI3_HUMAN	520.857	1434	9.02474
P08758	ANXA5	Annexin A5	32314.6	16	14.9799				P08758	ANXA5	Annexin A5	ANXA5_HUMAN	17835.9	34	14.1225
P08865	RPSA	40S ribosomal protein SA	16814.3	39	14.0374				P08865	RPSA	40S ribosomal protein SA	RSSA_HUMAN	11797	53	13.5261
P08962	CD63	CD63 antigen	1305.59	813	10.3505				P08962	CD63	CD63 antigen	CD63_HUMAN	921.322	939	9.84756
P09001	MRPL3	39S ribosomal protein L3, mitochondrial	197.012	2492	7.62214				P09001	MRPL3	39S ribosomal protein L3, mitochondrial	RM03_HUMAN	181.526	2529	7.50403
P09012	SNRPA	U1 small nuclear ribonucleoprotein A	1390.94	778	10.4418				P09012	SNRPA	U1 small nuclear ribonucleoprotein A	SNRPA_HUMAN	1437.17	673	10.489
P09104	ENO2	Gamma-enolase	1013.92	971	9.98572				P09104	ENO2	Gamma-enolase	ENOG_HUMAN	459.158	1558	8.84285
P09110	ACAA1	3-ketoacyl-CoA thiolase, peroxisomal	223.053	2394	7.80124				P09110	ACAA1	3-ketoacyl-CoA thiolase, peroxisomal	THIK_HUMAN	112.094	2849	6.80856
P09132	SRP19	Signal recognition particle 19 kDa protein	182.715	2562	7.51345				P09132	SRP19	Signal recognition particle 19 kDa protein	SRP19_HUMAN	482.461	1507	8.91427
P09211	GSTP1	Glutathione S-transferase P	1827.52	626	10.8357				P09211	GSTP1	Glutathione S-transferase P	GSTP1_HUMAN	3251.84	301	11.667
P09234	SNRPC	U1 small nuclear ribonucleoprotein C	562.111	1466	9.13471				P09234	SNRPC	U1 small nuclear ribonucleoprotein C	RU1C_HUMAN	238.362	2260	7.89701
P09382	LGALS1	Galectin-1	24430.5	25	14.5764				P09382	LGALS1	Galectin-1	LEG1_HUMAN	15632.1	38	13.9322
P09417	QDPR	Dihydropteridine reductase	583.405	1418	9.18835				P09417	QDPR	Dihydropteridine reductase	DHPR_HUMAN	498.906	1482	8.96262
P09429	HMGB1	High mobility group protein B1	2639.54	435	11.3661				P09429	HMGB1	High mobility group protein B1	HMGB1_HUMAN	1217.31	771	10.2495
P09467	FBP1	Fructose-1,6-bisphosphatase 1	102.554	2908	6.68024				P09467	FBP1	Fructose-1,6-bisphosphatase 1	F16P1_HUMAN	71.5838	3039	6.16156
P09488	GSTM1	Glutathione S-transferase Mu 1	195.883	2498	7.61385				P09488	GSTM1	Glutathione S-transferase Mu 1	GSTM1_HUMAN	235.046	2280	7.8768
P09493	TPM1	Tropomyosin alpha-1 chain	551.551	1483	9.10735				P09493	TPM1	Tropomyosin alpha-1 chain	TPM1_HUMAN	183.322	2519	7.51824
P09496	CLTA	Clathrin light chain A	3621.58	316	11.8224				P09496	CLTA	Clathrin light chain A	CLCA_HUMAN	2587.16	388	11.3372
P09497	CLTB	Clathrin light chain B	1394.91	776	10.446				P09497	CLTB	Clathrin light chain B	CLCB_HUMAN	1214.09	773	10.2457
P09525	ANXA4	Annexin A4	540.564	1504	9.07832				P09525	ANXA4	Annexin A4	ANXA4_HUMAN	395.828	1692	8.62873
P09543	CNP	2',3'-cyclic-nucleotide 3'-phosphodiesterase	572.398	1440	9.16087				P09543	CNP	2',3'-cyclic-nucleotide 3'-phosphodiesterase	CN37_HUMAN	636.455	1213	9.31391
P09622	DLD	Dihydrolipoyl dehydrogenase, mitochondrial	1542.95	709	10.5915				P09622	DLD	Dihydrolipoyl dehydrogenase, mitochondrial	DLDH_HUMAN	1644.3	599	10.6833
P09651	HNRNPA1	Heterogeneous nuclear ribonucleoprotein A1	1713.66	655	10.7429				P09651	HNRNPA1	Heterogeneous nuclear ribonucleoprotein A1	ROA1_HUMAN	8293.46	93	13.0178
P09661	SNRPA1	U2 small nuclear ribonucleoprotein A'	1094.38	923	10.0959				P09661	SNRPA1	U2 small nuclear ribonucleoprotein A'	RU2A_HUMAN	1513.17	642	10.5634
P09669	COX6C	Cytochrome c oxidase subunit 6C	963.377	1004	9.91196				P09669	COX6C	Cytochrome c oxidase subunit 6C	COX6C_HUMAN	629.923	1224	9.29903
P09758	TACSTD2	Tumor-associated calcium signal transducer 2	170.239	2617	7.41142				P09758	TACSTD2	Tumor-associated calcium signal transducer 2	TACD2_HUMAN	121.983	2805	6.93054
P09874	PARP1	Poly [ADP-ribose] polymerase 1	2305.71	497	11.171				P09874	PARP1	Poly [ADP-ribose] polymerase 1	PARP1_HUMAN	1839.98	544	10.8455
P09913	IFIT2	Interferon-induced protein with tetratricopeptide repeats 2	241.914	2332	7.91835				P09913	IFIT2	Interferon-induced protein with tetratricopeptide repeats 2	IFIT2_HUMAN	158.107	2634	7.30475
P09914	IFIT1	Interferon-induced protein with tetratricopeptide repeats 1	401.18	1813	8.64811				P09914	IFIT1	Interferon-induced protein with tetratricopeptide repeats 1	IFIT1_HUMAN	355.353	1814	8.47311
P09960	LTA4H	Leukotriene A-4 hydrolase	896.187	1057	9.80766				P09960	LTA4H	Leukotriene A-4 hydrolase	LKHA4_HUMAN	801.421	1033	9.64642
P09972	ALDOC	Fructose-bisphosphate aldolase C	1471.72	740	10.5233				P09972	ALDOC	Fructose-bisphosphate aldolase C	ALDOC_HUMAN	643.164	1206	9.32904
P0C0S5;Q71UI9	H2AFZ;H2AFV	Histone H2A.Z;Histone H2A.V	2041.68	556	10.9955				P0C0S5;Q71UI9	H2AFZ;H2AFV	Histone H2A.Z;Histone H2A.V	H2AZ_HUMAN;H2AV_HUMAN	1226.51	765	10.2603
P0C7M7	ACSM4	Acyl-coenzyme A synthetase ACSM4, mitochondrial	321.689	2058	8.32952				P0C7M7	ACSM4	Acyl-coenzyme A synthetase ACSM4, mitochondrial	ACSM4_HUMAN	248.286	2207	7.95586
P0CG29;P0CG30	GSTT2;GSTT2B	Glutathione S-transferase theta-2;Glutathione S-transferase theta-2B	80.622	3006	6.3331				P0CG29;P0CG30	GSTT2;GSTT2B	Glutathione S-transferase theta-2;Glutathione S-transferase theta-2B	GST2_HUMAN;GSTT2_HUMAN	114.229	2836	6.83578
P0DMV8;P0DMV9	HSPA1A;HSPA1B	Heat shock 70 kDa protein 1A;Heat shock 70 kDa protein 1B	4287.53	254	12.0659				P0DMV8;P0DMV9	HSPA1A;HSPA1B	Heat shock 70 kDa protein 1A;Heat shock 70 kDa protein 1B	HS71A_HUMAN;HS71B_HUMAN	2353.84	436	11.2008
P0DN76;Q01081	U2AF1L5;U2AF1	Splicing factor U2AF 35 kDa subunit-like protein;Splicing factor U2AF 35 kDa subunit	2376.6	481	11.2147				P0DN76;Q01081	U2AF1L5;U2AF1	Splicing factor U2AF 35 kDa subunit-like protein;Splicing factor U2AF 35 kDa subunit	U2AF5_HUMAN;U2AF1_HUMAN	2725.13	368	11.4121
P0DP23;P0DP24;P0DP25	CALM1;CALM2;CALM3	Calmodulin-1;Calmodulin-2;Calmodulin-3	25426.9	21	14.6341				P0DP23;P0DP24;P0DP25	CALM1;CALM2;CALM3	Calmodulin-1;Calmodulin-2;Calmodulin-3	CALM1_HUMAN;CALM2_HUMAN;CALM3_HUMAN	9353.58	80	13.1913
P0DPB6	POLR1D	DNA-directed RNA polymerases I and III subunit RPAC2	461.069	1642	8.84884				P0DPB6	POLR1D	DNA-directed RNA polymerases I and III subunit RPAC2	RPAC2_HUMAN	444.548	1582	8.7962
P10109	FDX1	Adrenodoxin, mitochondrial	191.63	2522	7.58218				P10109	FDX1	Adrenodoxin, mitochondrial	ADX_HUMAN	185.908	2504	7.53845
P10155	TROVE2	60 kDa SS-A/Ro ribonucleoprotein	484.528	1601	8.92044				P10155	TROVE2	60 kDa SS-A/Ro ribonucleoprotein	RO60_HUMAN	302.588	1994	8.24121
P10301	RRAS	Ras-related protein R-Ras	614.59	1371	9.26348				P10301	RRAS	Ras-related protein R-Ras	RRAS_HUMAN	1294.33	739	10.338
P10412	HIST1H1E	Histone H1.4	7726.75	118	12.9156				P10412	HIST1H1E	Histone H1.4	H14_HUMAN	11821.2	52	13.5291
P10515	DLAT	Dihydrolipoyllysine-residue acetyltransferase component of pyruvate dehydrogenase complex, mitochondrial	745.751	1190	9.54255				P10515	DLAT	Dihydrolipoyllysine-residue acetyltransferase component of pyruvate dehydrogenase complex, mitochondrial	ODP2_HUMAN	993.213	895	9.95596
P10599	TXN	Thioredoxin	26222.1	20	14.6785				P10599	TXN	Thioredoxin	THIO_HUMAN	12086.1	50	13.5611
P10606	COX5B	Cytochrome c oxidase subunit 5B, mitochondrial	1413.94	764	10.4655				P10606	COX5B	Cytochrome c oxidase subunit 5B, mitochondrial	COX5B_HUMAN	646.886	1202	9.33737
P10619	CTSA	Lysosomal protective protein	107.627	2889	6.7499				P10619	CTSA	Lysosomal protective protein	PPGB_HUMAN	177.74	2547	7.47363
P10620	MGST1	Microsomal glutathione S-transferase 1	1612.21	691	10.6548				P10620	MGST1	Microsomal glutathione S-transferase 1	MGST1_HUMAN	1619.03	611	10.6609
P10644	PRKAR1A	cAMP-dependent protein kinase type I-alpha regulatory subunit	1702.32	659	10.7333				P10644	PRKAR1A	cAMP-dependent protein kinase type I-alpha regulatory subunit	KAP0_HUMAN	1714.8	582	10.7438
P10768	ESD	S-formylglutathione hydrolase	1077.65	933	10.0737				P10768	ESD	S-formylglutathione hydrolase	ESTD_HUMAN	631.404	1223	9.30242
P10809	HSPD1	60 kDa heat shock protein, mitochondrial	6326.69	151	12.6272				P10809	HSPD1	60 kDa heat shock protein, mitochondrial	CH60_HUMAN	6387.93	131	12.6411
P11021	HSPA5	Endoplasmic reticulum chaperone BiP	5429.35	189	12.4066				P11021	HSPA5	Endoplasmic reticulum chaperone BiP	BIP_HUMAN	3508.13	280	11.7765
P11047	LAMC1	Laminin subunit gamma-1	176.716	2591	7.46529				P11047	LAMC1	Laminin subunit gamma-1	LAMC1_HUMAN	137.705	2741	7.10544
P11117	ACP2	Lysosomal acid phosphatase	137.612	2757	7.10446				P11117	ACP2	Lysosomal acid phosphatase	PPAL_HUMAN	66.479	3057	6.05483
P11142	HSPA8	Heat shock cognate 71 kDa protein	23901.3	27	14.5448				P11142	HSPA8	Heat shock cognate 71 kDa protein	HSP7C_HUMAN	12779.4	44	13.6415
P11166	SLC2A1	Solute carrier family 2, facilitated glucose transporter member 1	2148.63	532	11.0692				P11166	SLC2A1	Solute carrier family 2, facilitated glucose transporter member 1	GTR1_HUMAN	2092.52	484	11.031
P11172	UMPS	Uridine 5'-monophosphate synthase	439.885	1705	8.78098				P11172	UMPS	Uridine 5'-monophosphate synthase	UMPS_HUMAN	323.368	1921	8.33703
P11177	PDHB	Pyruvate dehydrogenase E1 component subunit beta, mitochondrial	969.982	1000	9.92181				P11177	PDHB	Pyruvate dehydrogenase E1 component subunit beta, mitochondrial	ODPB_HUMAN	1050.93	862	10.0375
P11216	PYGB	Glycogen phosphorylase, brain form	4365.68	249	12.092				P11216	PYGB	Glycogen phosphorylase, brain form	PYGB_HUMAN	1354.87	715	10.4039
P11233	RALA	Ras-related protein Ral-A	348.424	1968	8.4447				P11233	RALA	Ras-related protein Ral-A	RALA_HUMAN	388.528	1704	8.60188
P11234	RALB	Ras-related protein Ral-B	537.734	1513	9.07075				P11234	RALB	Ras-related protein Ral-B	RALB_HUMAN	602.382	1267	9.23454
P11279	LAMP1	Lysosome-associated membrane glycoprotein 1	2081.57	545	11.0235				P11279	LAMP1	Lysosome-associated membrane glycoprotein 1	LAMP1_HUMAN	2601.29	385	11.345
P11310	ACADM	Medium-chain specific acyl-CoA dehydrogenase, mitochondrial	494.042	1579	8.94849				P11310	ACADM	Medium-chain specific acyl-CoA dehydrogenase, mitochondrial	ACADM_HUMAN	476.33	1520	8.89582
P11387	TOP1	DNA topoisomerase 1	1238.23	845	10.2741				P11387	TOP1	DNA topoisomerase 1	TOP1_HUMAN	2428.59	414	11.2459
P11388	TOP2A	DNA topoisomerase 2-alpha	1464.95	745	10.5166				P11388	TOP2A	DNA topoisomerase 2-alpha	TOP2A_HUMAN	1486.58	651	10.5378
P11413	G6PD	Glucose-6-phosphate 1-dehydrogenase	4507.7	242	12.1382				P11413	G6PD	Glucose-6-phosphate 1-dehydrogenase	G6PD_HUMAN	2237.2	456	11.1275
P11441	UBL4A	Ubiquitin-like protein 4A	182.911	2560	7.515				P11441	UBL4A	Ubiquitin-like protein 4A	UBL4A_HUMAN	338.777	1866	8.40419
P11498	PC	Pyruvate carboxylase, mitochondrial	348.319	1969	8.44427				P11498	PC	Pyruvate carboxylase, mitochondrial	PYC_HUMAN	340.346	1855	8.41086
P11586	MTHFD1	C-1-tetrahydrofolate synthase, cytoplasmic	5306.88	192	12.3736				P11586	MTHFD1	C-1-tetrahydrofolate synthase, cytoplasmic	C1TC_HUMAN	4744.98	194	12.2122
P11717	IGF2R	Cation-independent mannose-6-phosphate receptor	302.549	2118	8.24103				P11717	IGF2R	Cation-independent mannose-6-phosphate receptor	MPRI_HUMAN	494.17	1490	8.94886
P11766	ADH5	Alcohol dehydrogenase class-3	1980.09	575	10.9513				P11766	ADH5	Alcohol dehydrogenase class-3	ADHX_HUMAN	2001.27	506	10.9667
P11908	PRPS2	Ribose-phosphate pyrophosphokinase 2	556.499	1474	9.12024				P11908	PRPS2	Ribose-phosphate pyrophosphokinase 2	PRPS2_HUMAN	443.512	1583	8.79283
P11940	PABPC1	Polyadenylate-binding protein 1	12941.8	59	13.6597				P11940	PABPC1	Polyadenylate-binding protein 1	PABP1_HUMAN	8489.91	89	13.0515
P12004	PCNA	Proliferating cell nuclear antigen	4152.98	264	12.0199				P12004	PCNA	Proliferating cell nuclear antigen	PCNA_HUMAN	4046.55	234	11.9825
P12081	HARS	Histidine--tRNA ligase, cytoplasmic	1773.31	641	10.7922				P12081	HARS	Histidine--tRNA ligase, cytoplasmic	SYHC_HUMAN	2459.15	409	11.2639
P12235	SLC25A4	ADP/ATP translocase 1	481.524	1608	8.91146				P12235	SLC25A4	ADP/ATP translocase 1	ADT1_HUMAN	294.89	2021	8.20403
P12236	SLC25A6	ADP/ATP translocase 3	1923.11	592	10.9092				P12236	SLC25A6	ADP/ATP translocase 3	ADT3_HUMAN	7010.36	114	12.7753
P12259	F5	Coagulation factor V	216.041	2423	7.75516				P12259	F5	Coagulation factor V	FA5_HUMAN	115.038	2833	6.84597
P12268	IMPDH2	Inosine-5'-monophosphate dehydrogenase 2	4894.97	217	12.2571				P12268	IMPDH2	Inosine-5'-monophosphate dehydrogenase 2	IMDH2_HUMAN	4749.15	193	12.2135
P12270	TPR	Nucleoprotein TPR	1111.01	911	10.1177				P12270	TPR	Nucleoprotein TPR	TPR_HUMAN	1050.17	864	10.0364
P12277	CKB	Creatine kinase B-type	215.131	2424	7.74907				P12277	CKB	Creatine kinase B-type	KCRB_HUMAN	189.477	2495	7.56588
P12429	ANXA3	Annexin A3	6435.23	146	12.6518				P12429	ANXA3	Annexin A3	ANXA3_HUMAN	4843.46	188	12.2418
P12814	ACTN1	Alpha-actinin-1	9595.31	85	13.2281				P12814	ACTN1	Alpha-actinin-1	ACTN1_HUMAN	11017.6	61	13.4275
P12931	SRC	Proto-oncogene tyrosine-protein kinase Src	394.814	1825	8.62503				P12931	SRC	Proto-oncogene tyrosine-protein kinase Src	SRC_HUMAN	345.407	1838	8.43215
P12955	PEPD	Xaa-Pro dipeptidase	1713.45	656	10.7427				P12955	PEPD	Xaa-Pro dipeptidase	PEPD_HUMAN	1189.57	787	10.2162
P12956	XRCC6	X-ray repair cross-complementing protein 6	3927.84	283	11.9395				P12956	XRCC6	X-ray repair cross-complementing protein 6	XRCC6_HUMAN	1771.46	571	10.7907
P13010	XRCC5	X-ray repair cross-complementing protein 5	3952.68	280	11.9486				P13010	XRCC5	X-ray repair cross-complementing protein 5	XRCC5_HUMAN	4197.64	226	12.0354
P13073	COX4I1	Cytochrome c oxidase subunit 4 isoform 1, mitochondrial	817.75	1128	9.67552				P13073	COX4I1	Cytochrome c oxidase subunit 4 isoform 1, mitochondrial	COX41_HUMAN	1359.22	711	10.4086
P13473	LAMP2	Lysosome-associated membrane glycoprotein 2	1886.05	609	10.8812				P13473	LAMP2	Lysosome-associated membrane glycoprotein 2	LAMP2_HUMAN	2044.24	493	10.9973
P13489	RNH1	Ribonuclease inhibitor	2774.44	415	11.438				P13489	RNH1	Ribonuclease inhibitor	RINI_HUMAN	2756.98	362	11.4289
P13639	EEF2	Elongation factor 2	24606.2	23	14.5867				P13639	EEF2	Elongation factor 2	EF2_HUMAN	25516.9	19	14.6392
P13645	KRT10	Keratin, type I cytoskeletal 10	429.044	1730	8.74498				P13645	KRT10	Keratin, type I cytoskeletal 10	K1C10_HUMAN	245.956	2217	7.94226
P13667	PDIA4	Protein disulfide-isomerase A4	2437.62	466	11.2513				P13667	PDIA4	Protein disulfide-isomerase A4	PDIA4_HUMAN	2909.27	342	11.5064
P13674	P4HA1	Prolyl 4-hydroxylase subunit alpha-1	184.741	2552	7.52936				P13674	P4HA1	Prolyl 4-hydroxylase subunit alpha-1	P4HA1_HUMAN	309.259	1976	8.27267
P13693	TPT1	Translationally-controlled tumor protein	2767.16	416	11.4342				P13693	TPT1	Translationally-controlled tumor protein	TCTP_HUMAN	1465.6	661	10.5173
P13716	ALAD	Delta-aminolevulinic acid dehydratase	91.2305	2961	6.51144				P13716	ALAD	Delta-aminolevulinic acid dehydratase	HEM2_HUMAN	126.741	2781	6.98574
P13726	F3	Tissue factor	596.614	1400	9.22065				P13726	F3	Tissue factor	TF_HUMAN	935.968	927	9.87032
P13796	LCP1	Plastin-2	822.153	1121	9.68326				P13796	LCP1	Plastin-2	PLSL_HUMAN	812.29	1024	9.66585
P13797	PLS3	Plastin-3	2320.33	492	11.1801				P13797	PLS3	Plastin-3	PLST_HUMAN	2272.77	451	11.1502
P13798	APEH	Acylamino-acid-releasing enzyme	932.974	1021	9.86569				P13798	APEH	Acylamino-acid-releasing enzyme	ACPH_HUMAN	1100.55	838	10.104
P13804	ETFA	Electron transfer flavoprotein subunit alpha, mitochondrial	436.963	1712	8.77137				P13804	ETFA	Electron transfer flavoprotein subunit alpha, mitochondrial	ETFA_HUMAN	518.813	1437	9.01907
P13807	GYS1	Glycogen [starch] synthase, muscle	122.684	2827	6.9388				P13807	GYS1	Glycogen [starch] synthase, muscle	GYS1_HUMAN	181.359	2530	7.5027
P13861	PRKAR2A	cAMP-dependent protein kinase type II-alpha regulatory subunit	1273.48	830	10.3146				P13861	PRKAR2A	cAMP-dependent protein kinase type II-alpha regulatory subunit	KAP2_HUMAN	1371	701	10.421
P13929	ENO3	Beta-enolase	8302.57	109	13.0193				P13929	ENO3	Beta-enolase	ENOB_HUMAN	490.118	1492	8.93699
P13984	GTF2F2	General transcription factor IIF subunit 2	622.891	1365	9.28284				P13984	GTF2F2	General transcription factor IIF subunit 2	T2FB_HUMAN	366.336	1776	8.51702
P13987	CD59	CD59 glycoprotein	1965.45	579	10.9406				P13987	CD59	CD59 glycoprotein	CD59_HUMAN	1398.38	688	10.4495
P14174	MIF	Macrophage migration inhibitory factor	25022.4	22	14.6109				P14174	MIF	Macrophage migration inhibitory factor	MIF_HUMAN	19926.7	31	14.2824
P14314	PRKCSH	Glucosidase 2 subunit beta	6212.68	155	12.601				P14314	PRKCSH	Glucosidase 2 subunit beta	GLU2B_HUMAN	3561.91	278	11.7984
P14324	FDPS	Farnesyl pyrophosphate synthase	1997.86	573	10.9642				P14324	FDPS	Farnesyl pyrophosphate synthase	FPPS_HUMAN	995.465	893	9.95923
P14406	COX7A2	Cytochrome c oxidase subunit 7A2, mitochondrial	909.068	1048	9.82825				P14406	COX7A2	Cytochrome c oxidase subunit 7A2, mitochondrial	CX7A2_HUMAN	857.44	992	9.74389
P14550	AKR1A1	Aldo-keto reductase family 1 member A1	213.762	2434	7.73986				P14550	AKR1A1	Aldo-keto reductase family 1 member A1	AK1A1_HUMAN	381.657	1729	8.57613
P14618	PKM	Pyruvate kinase PKM	58614.3	5	15.839				P14618	PKM	Pyruvate kinase PKM	KPYM_HUMAN	35825	9	15.1287
P14625	HSP90B1	Endoplasmin	12441.3	66	13.6028				P14625	HSP90B1	Endoplasmin	ENPL_HUMAN	11317.9	57	13.4663
P14635	CCNB1	G2/mitotic-specific cyclin-B1	276.174	2197	8.10943				P14635	CCNB1	G2/mitotic-specific cyclin-B1	CCNB1_HUMAN	140.32	2728	7.13258
P14649	MYL6B	Myosin light chain 6B	9052.94	93	13.1442				P14649	MYL6B	Myosin light chain 6B	MYL6B_HUMAN	74.1089	3025	6.21158
P14678	SNRPB	Small nuclear ribonucleoprotein-associated proteins B and B'	3068.43	377	11.5833				P14678	SNRPB	Small nuclear ribonucleoprotein-associated proteins B and B'	RSMB_HUMAN	960.012	913	9.90691
P14735	IDE	Insulin-degrading enzyme	1130.74	898	10.1431				P14735	IDE	Insulin-degrading enzyme	IDE_HUMAN	958.981	915	9.90536
P14854	COX6B1	Cytochrome c oxidase subunit 6B1	2589.64	441	11.3385				P14854	COX6B1	Cytochrome c oxidase subunit 6B1	CX6B1_HUMAN	1318.92	729	10.3651
P14866	HNRNPL	Heterogeneous nuclear ribonucleoprotein L	4114.08	267	12.0064				P14866	HNRNPL	Heterogeneous nuclear ribonucleoprotein L	HNRPL_HUMAN	3053.9	323	11.5764
P14868	DARS	Aspartate--tRNA ligase, cytoplasmic	3082.39	376	11.5898				P14868	DARS	Aspartate--tRNA ligase, cytoplasmic	SYDC_HUMAN	1773.6	570	10.7925
P14927	UQCRB	Cytochrome b-c1 complex subunit 7	308.682	2099	8.26998				P14927	UQCRB	Cytochrome b-c1 complex subunit 7	QCR7_HUMAN	44.8434	3115	5.48682
P15121	AKR1B1	Aldose reductase	3918.4	285	11.936				P15121	AKR1B1	Aldose reductase	ALDR_HUMAN	3623.63	268	11.8232
P15153	RAC2	Ras-related C3 botulinum toxin substrate 2	1968.37	577	10.9428				P15153	RAC2	Ras-related C3 botulinum toxin substrate 2	RAC2_HUMAN	1867.71	532	10.8671
P15170	GSPT1	Eukaryotic peptide chain release factor GTP-binding subunit ERF3A	1163.63	885	10.1844				P15170	GSPT1	Eukaryotic peptide chain release factor GTP-binding subunit ERF3A	ERF3A_HUMAN	1075.14	852	10.0703
P15311	EZR	Ezrin	3523.89	327	11.783				P15311	EZR	Ezrin	EZRI_HUMAN	3465.14	283	11.7587
P15374	UCHL3	Ubiquitin carboxyl-terminal hydrolase isozyme L3	1308.53	810	10.3537				P15374	UCHL3	Ubiquitin carboxyl-terminal hydrolase isozyme L3	UCHL3_HUMAN	689.589	1151	9.42959
P15408	FOSL2	Fos-related antigen 2	45.6624	3105	5.51294				P15408	FOSL2	Fos-related antigen 2	FOSL2_HUMAN	49.4927	3106	5.62914
P15529	CD46	Membrane cofactor protein	692.768	1274	9.43623				P15529	CD46	Membrane cofactor protein	MCP_HUMAN	262.637	2149	8.03693
P15531	NME1	Nucleoside diphosphate kinase A	3025.71	380	11.5631				P15531	NME1	Nucleoside diphosphate kinase A	NDKA_HUMAN	2971.6	335	11.537
P15586	GNS	N-acetylglucosamine-6-sulfatase	636.299	1344	9.31356				P15586	GNS	N-acetylglucosamine-6-sulfatase	GNS_HUMAN	689.361	1152	9.42912
P15880	RPS2	40S ribosomal protein S2	4083.02	268	11.9954				P15880	RPS2	40S ribosomal protein S2	RS2_HUMAN	9407.03	76	13.1995
P15924	DSP	Desmoplakin	84.4298	2990	6.39968				P15924	DSP	Desmoplakin	DESP_HUMAN	154.352	2656	7.27008
P15927	RPA2	Replication protein A 32 kDa subunit	760.34	1175	9.5705				P15927	RPA2	Replication protein A 32 kDa subunit	RFA2_HUMAN	510.411	1454	8.99552
P15954	COX7C	Cytochrome c oxidase subunit 7C, mitochondrial	1501.99	732	10.5527				P15954	COX7C	Cytochrome c oxidase subunit 7C, mitochondrial	COX7C_HUMAN	1171.68	799	10.1944
P16070	CD44	CD44 antigen	4749.52	224	12.2136				P16070	CD44	CD44 antigen	CD44_HUMAN	4444.43	208	12.1178
P16083	NQO2	Ribosyldihydronicotinamide dehydrogenase [quinone]	361.11	1920	8.4963				P16083	NQO2	Ribosyldihydronicotinamide dehydrogenase [quinone]	NQO2_HUMAN	482.101	1508	8.91319
P16144	ITGB4	Integrin beta-4	473.329	1625	8.8867				P16144	ITGB4	Integrin beta-4	ITB4_HUMAN	549.657	1368	9.10239
P16152	CBR1	Carbonyl reductase [NADPH] 1	1568.71	699	10.6154				P16152	CBR1	Carbonyl reductase [NADPH] 1	CBR1_HUMAN	1508.29	644	10.5587
P16333	NCK1	Cytoplasmic protein NCK1	142.224	2730	7.15202				P16333	NCK1	Cytoplasmic protein NCK1	NCK1_HUMAN	149.694	2677	7.22587
P16401	HIST1H1B	Histone H1.5	60546.8	3	15.8858				P16401	HIST1H1B	Histone H1.5	H15_HUMAN	56973.6	4	15.798
P16403	HIST1H1C	Histone H1.2	38257	12	15.2234				P16403	HIST1H1C	Histone H1.2	H12_HUMAN	30952.8	15	14.9178
P16435	POR	NADPH--cytochrome P450 reductase	385.426	1847	8.59031				P16435	POR	NADPH--cytochrome P450 reductase	NCPR_HUMAN	203.217	2417	7.66687
P16615	ATP2A2	Sarcoplasmic/endoplasmic reticulum calcium ATPase 2	2238.91	507	11.1286				P16615	ATP2A2	Sarcoplasmic/endoplasmic reticulum calcium ATPase 2	AT2A2_HUMAN	1990.55	508	10.959
P16930	FAH	Fumarylacetoacetase	539.246	1508	9.0748				P16930	FAH	Fumarylacetoacetase	FAAA_HUMAN	512.114	1448	9.00032
P16949	STMN1	Stathmin	10431.7	81	13.3487				P16949	STMN1	Stathmin	STMN1_HUMAN	7289.36	109	12.8316
P16989	YBX3	Y-box-binding protein 3	509.241	1555	8.9922				P16989	YBX3	Y-box-binding protein 3	YBOX3_HUMAN	473.699	1527	8.88783
P17096	HMGA1	High mobility group protein HMG-I/HMG-Y	14103.2	56	13.7837				P17096	HMGA1	High mobility group protein HMG-I/HMG-Y	HMGA1_HUMAN	9591.73	73	13.2276
P17152	TMEM11	Transmembrane protein 11, mitochondrial	378.317	1863	8.56345				P17152	TMEM11	Transmembrane protein 11, mitochondrial	TMM11_HUMAN	472.73	1529	8.88487
P17174	GOT1	Aspartate aminotransferase, cytoplasmic	3391.49	340	11.7277				P17174	GOT1	Aspartate aminotransferase, cytoplasmic	AATC_HUMAN	2427.54	416	11.2453
P17252	PRKCA	Protein kinase C alpha type	201.622	2477	7.65551				P17252	PRKCA	Protein kinase C alpha type	KPCA_HUMAN	169.895	2580	7.4085
P17301	ITGA2	Integrin alpha-2	1304.26	814	10.349				P17301	ITGA2	Integrin alpha-2	ITA2_HUMAN	820.876	1015	9.68102
P17480	UBTF	Nucleolar transcription factor 1	370.302	1887	8.53256				P17480	UBTF	Nucleolar transcription factor 1	UBF1_HUMAN	239.88	2250	7.90617
P17612	PRKACA	cAMP-dependent protein kinase catalytic subunit alpha	238.32	2343	7.89676				P17612	PRKACA	cAMP-dependent protein kinase catalytic subunit alpha	KAPCA_HUMAN	747.953	1088	9.5468
P17655	CAPN2	Calpain-2 catalytic subunit	4343.32	251	12.0846				P17655	CAPN2	Calpain-2 catalytic subunit	CAN2_HUMAN	4908.05	185	12.2609
P17676	CEBPB	CCAAT/enhancer-binding protein beta	242.411	2328	7.92131				P17676	CEBPB	CCAAT/enhancer-binding protein beta	CEBPB_HUMAN	192.786	2478	7.59085
P17812	CTPS1	CTP synthase 1	1571.66	698	10.6181				P17812	CTPS1	CTP synthase 1	PYRG1_HUMAN	640.306	1209	9.32262
P17844	DDX5	Probable ATP-dependent RNA helicase DDX5	4534.18	239	12.1466				P17844	DDX5	Probable ATP-dependent RNA helicase DDX5	DDX5_HUMAN	6176.75	137	12.5926
P17858	PFKL	ATP-dependent 6-phosphofructokinase, liver type	251.687	2288	7.97549				P17858	PFKL	ATP-dependent 6-phosphofructokinase, liver type	PFKAL_HUMAN	656.194	1192	9.35798
P17931	LGALS3	Galectin-3	2554.82	447	11.319				P17931	LGALS3	Galectin-3	LEG3_HUMAN	3012.68	330	11.5568
P17980	PSMC3	26S proteasome regulatory subunit 6A	2182.9	519	11.092				P17980	PSMC3	26S proteasome regulatory subunit 6A	PRS6A_HUMAN	1472.21	658	10.5238
P17987	TCP1	T-complex protein 1 subunit alpha	6232.05	154	12.6055				P17987	TCP1	T-complex protein 1 subunit alpha	TCPA_HUMAN	6365.09	133	12.636
P18031	PTPN1	Tyrosine-protein phosphatase non-receptor type 1	1159.31	890	10.179				P18031	PTPN1	Tyrosine-protein phosphatase non-receptor type 1	PTN1_HUMAN	659.971	1186	9.36626
P18077	RPL35A	60S ribosomal protein L35a	2416.81	471	11.2389				P18077	RPL35A	60S ribosomal protein L35a	RL35A_HUMAN	1086.31	845	10.0852
P18085	ARF4	ADP-ribosylation factor 4	5952.06	165	12.5392				P18085	ARF4	ADP-ribosylation factor 4	ARF4_HUMAN	6054.24	144	12.5637
P18124	RPL7	60S ribosomal protein L7	5071.04	206	12.3081				P18124	RPL7	60S ribosomal protein L7	RL7_HUMAN	9232.31	81	13.1725
P18206	VCL	Vinculin	6476.74	145	12.6611				P18206	VCL	Vinculin	VINC_HUMAN	5967.74	145	12.543
P18583	SON	Protein SON	452.116	1674	8.82055				P18583	SON	Protein SON	SON_HUMAN	540.565	1387	9.07833
P18615	NELFE	Negative elongation factor E	369.208	1892	8.52829				P18615	NELFE	Negative elongation factor E	NELFE_HUMAN	675.791	1167	9.40043
P18621	RPL17	60S ribosomal protein L17	2920.72	389	11.5121				P18621	RPL17	60S ribosomal protein L17	RL17_HUMAN	1872.15	530	10.8705
P18669	PGAM1	Phosphoglycerate mutase 1	3767.35	297	11.8793				P18669	PGAM1	Phosphoglycerate mutase 1	PGAM1_HUMAN	1615	612	10.6573
P18754	RCC1	Regulator of chromosome condensation	1506.9	730	10.5574				P18754	RCC1	Regulator of chromosome condensation	RCC1_HUMAN	1346.22	718	10.3947
P18858	LIG1	DNA ligase 1	568.549	1447	9.15114				P18858	LIG1	DNA ligase 1	DNLI1_HUMAN	598.792	1276	9.22591
P18859	ATP5PF	ATP synthase-coupling factor 6, mitochondrial	343.821	1987	8.42551				P18859	ATP5PF	ATP synthase-coupling factor 6, mitochondrial	ATP5J_HUMAN	359.787	1794	8.491
P18887	XRCC1	DNA repair protein XRCC1	182.036	2563	7.50808				P18887	XRCC1	DNA repair protein XRCC1	XRCC1_HUMAN	212.97	2371	7.73451
P19174	PLCG1	1-phosphatidylinositol 4,5-bisphosphate phosphodiesterase gamma-1	283.956	2173	8.14952				P19174	PLCG1	1-phosphatidylinositol 4,5-bisphosphate phosphodiesterase gamma-1	PLCG1_HUMAN	231.192	2299	7.85295
P19256	CD58	Lymphocyte function-associated antigen 3	548.749	1485	9.1				P19256	CD58	Lymphocyte function-associated antigen 3	LFA3_HUMAN	432.35	1609	8.75605
P19338	NCL	Nucleolin	10229.8	82	13.3205				P19338	NCL	Nucleolin	NUCL_HUMAN	14028.4	42	13.7761
P19367	HK1	Hexokinase-1	2065.04	549	11.012				P19367	HK1	Hexokinase-1	HXK1_HUMAN	2392	425	11.224
P19387	POLR2C	DNA-directed RNA polymerase II subunit RPB3	291.912	2148	8.18939				P19387	POLR2C	DNA-directed RNA polymerase II subunit RPB3	RPB3_HUMAN	386.86	1710	8.59567
P19388	POLR2E	DNA-directed RNA polymerases I, II, and III subunit RPABC1	579.789	1426	9.17938				P19388	POLR2E	DNA-directed RNA polymerases I, II, and III subunit RPABC1	RPAB1_HUMAN	770.381	1056	9.58943
P19404	NDUFV2	NADH dehydrogenase [ubiquinone] flavoprotein 2, mitochondrial	88.5478	2972	6.46838				P19404	NDUFV2	NADH dehydrogenase [ubiquinone] flavoprotein 2, mitochondrial	NDUV2_HUMAN	281.551	2071	8.13725
P19525	EIF2AK2	Interferon-induced, double-stranded RNA-activated protein kinase	369.072	1894	8.52776				P19525	EIF2AK2	Interferon-induced, double-stranded RNA-activated protein kinase	E2AK2_HUMAN	226.923	2310	7.82606
P19623	SRM	Spermidine synthase	3255	352	11.6684				P19623	SRM	Spermidine synthase	SPEE_HUMAN	2219.34	461	11.1159
P19784	CSNK2A2	Casein kinase II subunit alpha'	269.383	2221	8.07351				P19784	CSNK2A2	Casein kinase II subunit alpha'	CSK22_HUMAN	271.588	2109	8.08528
P19838	NFKB1	Nuclear factor NF-kappa-B p105 subunit	344.176	1986	8.427				P19838	NFKB1	Nuclear factor NF-kappa-B p105 subunit	NFKB1_HUMAN	237.978	2261	7.89469
P20020	ATP2B1	Plasma membrane calcium-transporting ATPase 1	424.878	1743	8.7309				P20020	ATP2B1	Plasma membrane calcium-transporting ATPase 1	AT2B1_HUMAN	357.868	1806	8.48329
P20042	EIF2S2	Eukaryotic translation initiation factor 2 subunit 2	1848.43	620	10.8521				P20042	EIF2S2	Eukaryotic translation initiation factor 2 subunit 2	IF2B_HUMAN	1386.99	694	10.4377
P20073	ANXA7	Annexin A7	1784.36	639	10.8012				P20073	ANXA7	Annexin A7	ANXA7_HUMAN	1186.22	790	10.2122
P20290	BTF3	Transcription factor BTF3	1616.93	687	10.659				P20290	BTF3	Transcription factor BTF3	BTF3_HUMAN	482.89	1505	8.91555
P20339	RAB5A	Ras-related protein Rab-5A	3045.71	379	11.5726				P20339	RAB5A	Ras-related protein Rab-5A	RAB5A_HUMAN	515.619	1440	9.01016
P20340	RAB6A	Ras-related protein Rab-6A	1511.53	726	10.5618				P20340	RAB6A	Ras-related protein Rab-6A	RAB6A_HUMAN	1551.84	629	10.5998
P20618	PSMB1	Proteasome subunit beta type-1	1047.92	950	10.0333				P20618	PSMB1	Proteasome subunit beta type-1	PSB1_HUMAN	1397.43	690	10.4486
P20645	M6PR	Cation-dependent mannose-6-phosphate receptor	589.488	1409	9.20332				P20645	M6PR	Cation-dependent mannose-6-phosphate receptor	MPRD_HUMAN	243.199	2229	7.926
P20674	COX5A	Cytochrome c oxidase subunit 5A, mitochondrial	1435.56	756	10.4874				P20674	COX5A	Cytochrome c oxidase subunit 5A, mitochondrial	COX5A_HUMAN	1461.2	664	10.5129
P20700	LMNB1	Lamin-B1	3220.7	357	11.6532				P20700	LMNB1	Lamin-B1	LMNB1_HUMAN	6904.95	120	12.7534
P20810	CAST	Calpastatin	2883.97	398	11.4938				P20810	CAST	Calpastatin	ICAL_HUMAN	2605.51	381	11.3473
P20839	IMPDH1	Inosine-5'-monophosphate dehydrogenase 1	342.859	1990	8.42147				P20839	IMPDH1	Inosine-5'-monophosphate dehydrogenase 1	IMDH1_HUMAN	383.234	1725	8.58208
P20936	RASA1	Ras GTPase-activating protein 1	178.244	2583	7.47771				P20936	RASA1	Ras GTPase-activating protein 1	RASA1_HUMAN	182.729	2525	7.51356
P20962	PTMS	Parathymosin	5560.43	186	12.441				P20962	PTMS	Parathymosin	PTMS_HUMAN	6308.62	134	12.6231
P21127	CDK11B	Cyclin-dependent kinase 11B	717.365	1237	9.48656				P21127	CDK11B	Cyclin-dependent kinase 11B	CD11B_HUMAN	770.521	1055	9.58969
P21266	GSTM3	Glutathione S-transferase Mu 3	567.473	1451	9.14841				P21266	GSTM3	Glutathione S-transferase Mu 3	GSTM3_HUMAN	783.404	1047	9.61361
P21281	ATP6V1B2	V-type proton ATPase subunit B, brain isoform	898.24	1056	9.81096				P21281	ATP6V1B2	V-type proton ATPase subunit B, brain isoform	VATB2_HUMAN	621.229	1237	9.27898
P21283	ATP6V1C1	V-type proton ATPase subunit C 1	378.733	1861	8.56504				P21283	ATP6V1C1	V-type proton ATPase subunit C 1	VATC1_HUMAN	326.427	1908	8.35062
P21291	CSRP1	Cysteine and glycine-rich protein 1	2510.59	453	11.2938				P21291	CSRP1	Cysteine and glycine-rich protein 1	CSRP1_HUMAN	2017.77	501	10.9785
P21333	FLNA	Filamin-A	14518.3	51	13.8256				P21333	FLNA	Filamin-A	FLNA_HUMAN	14138.4	41	13.7873
P21397;P27338	MAOA;MAOB	Amine oxidase [flavin-containing] A;Amine oxidase [flavin-containing] B	99.011	2925	6.62952				P21397;P27338	MAOA;MAOB	Amine oxidase [flavin-containing] A;Amine oxidase [flavin-containing] B	AOFA_HUMAN;AOFB_HUMAN	110.27	2857	6.78489
P21399	ACO1	Cytoplasmic aconitate hydratase	1514.65	724	10.5648				P21399	ACO1	Cytoplasmic aconitate hydratase	ACOC_HUMAN	1179.92	793	10.2045
P21589	NT5E	5'-nucleotidase	3702.39	301	11.8542				P21589	NT5E	5'-nucleotidase	5NTD_HUMAN	2882.67	347	11.4932
P21796	VDAC1	Voltage-dependent anion-selective channel protein 1	3094.26	374	11.5954				P21796	VDAC1	Voltage-dependent anion-selective channel protein 1	VDAC1_HUMAN	2530.64	396	11.3053
P21912	SDHB	Succinate dehydrogenase [ubiquinone] iron-sulfur subunit, mitochondrial	529.541	1530	9.0486				P21912	SDHB	Succinate dehydrogenase [ubiquinone] iron-sulfur subunit, mitochondrial	SDHB_HUMAN	237.163	2267	7.88973
P21926	CD9	CD9 antigen	2912.21	394	11.5079				P21926	CD9	CD9 antigen	CD9_HUMAN	2801.85	353	11.4522
P21980	TGM2	Protein-glutamine gamma-glutamyltransferase 2	5056.6	207	12.304				P21980	TGM2	Protein-glutamine gamma-glutamyltransferase 2	TGM2_HUMAN	6866.54	122	12.7454
P22059	OSBP	Oxysterol-binding protein 1	568.129	1449	9.15007				P22059	OSBP	Oxysterol-binding protein 1	OSBP1_HUMAN	686.025	1158	9.42212
P22061	PCMT1	Protein-L-isoaspartate(D-aspartate) O-methyltransferase	1355.27	792	10.4044				P22061	PCMT1	Protein-L-isoaspartate(D-aspartate) O-methyltransferase	PIMT_HUMAN	1442.18	671	10.494
P22087	FBL	rRNA 2'-O-methyltransferase fibrillarin	2056.18	553	11.0057				P22087	FBL	rRNA 2'-O-methyltransferase fibrillarin	FBRL_HUMAN	1217.72	770	10.25
P22102	GART	Trifunctional purine biosynthetic protein adenosine-3	3377.5	342	11.7217				P22102	GART	Trifunctional purine biosynthetic protein adenosine-3	PUR2_HUMAN	3334.4	293	11.7032
P22234	PAICS	Multifunctional protein ADE2	5276.21	194	12.3653				P22234	PAICS	Multifunctional protein ADE2	PUR6_HUMAN	3968.03	239	11.9542
P22307	SCP2	Non-specific lipid-transfer protein	1221.53	854	10.2545				P22307	SCP2	Non-specific lipid-transfer protein	NLTP_HUMAN	811.682	1025	9.66477
P22314	UBA1	Ubiquitin-like modifier-activating enzyme 1	4372.02	248	12.0941				P22314	UBA1	Ubiquitin-like modifier-activating enzyme 1	UBA1_HUMAN	3772.86	252	11.8814
P22392	NME2	Nucleoside diphosphate kinase B	16591.4	41	14.0182				P22392	NME2	Nucleoside diphosphate kinase B	NDKB_HUMAN	21408.6	29	14.3859
P22626	HNRNPA2B1	Heterogeneous nuclear ribonucleoproteins A2/B1	22505.5	31	14.458				P22626	HNRNPA2B1	Heterogeneous nuclear ribonucleoproteins A2/B1	ROA2_HUMAN	23190.1	23	14.5012
P22676	CALB2	Calretinin	797.075	1150	9.63857				P22676	CALB2	Calretinin	CALB2_HUMAN	310.683	1970	8.2793
P22681	CBL	E3 ubiquitin-protein ligase CBL	126.974	2808	6.98839				P22681	CBL	E3 ubiquitin-protein ligase CBL	CBL_HUMAN	46.0747	3113	5.5259
P22692	IGFBP4	Insulin-like growth factor-binding protein 4	127.484	2806	6.99417				P22692	IGFBP4	Insulin-like growth factor-binding protein 4	IBP4_HUMAN	43.1871	3121	5.43253
P22695	UQCRC2	Cytochrome b-c1 complex subunit 2, mitochondrial	455.586	1666	8.83158				P22695	UQCRC2	Cytochrome b-c1 complex subunit 2, mitochondrial	QCR2_HUMAN	315.981	1950	8.3037
P23193	TCEA1	Transcription elongation factor A protein 1	710.384	1250	9.47245				P23193	TCEA1	Transcription elongation factor A protein 1	TCEA1_HUMAN	820.919	1014	9.6811
P23229	ITGA6	Integrin alpha-6	372.154	1882	8.53976				P23229	ITGA6	Integrin alpha-6	ITA6_HUMAN	358.77	1797	8.48692
P23246	SFPQ	Splicing factor, proline- and glutamine-rich	5284.65	193	12.3676				P23246	SFPQ	Splicing factor, proline- and glutamine-rich	SFPQ_HUMAN	3276.23	297	11.6778
P23258	TUBG1	Tubulin gamma-1 chain	963.936	1003	9.91279				P23258	TUBG1	Tubulin gamma-1 chain	TBG1_HUMAN	755.819	1078	9.5619
P23284	PPIB	Peptidyl-prolyl cis-trans isomerase B	2406.42	474	11.2327				P23284	PPIB	Peptidyl-prolyl cis-trans isomerase B	PPIB_HUMAN	2679.94	376	11.388
P23368	ME2	NAD-dependent malic enzyme, mitochondrial	145.455	2717	7.18443				P23368	ME2	NAD-dependent malic enzyme, mitochondrial	MAOM_HUMAN	195.151	2466	7.60845
P23381	WARS	Tryptophan--tRNA ligase, cytoplasmic	1169.7	881	10.1919				P23381	WARS	Tryptophan--tRNA ligase, cytoplasmic	SYWC_HUMAN	1594.17	620	10.6386
P23396	RPS3	40S ribosomal protein S3	9018.77	95	13.1387				P23396	RPS3	40S ribosomal protein S3	RS3_HUMAN	11222.3	60	13.4541
P23497	SP100	Nuclear autoantigen Sp-100	461.6	1639	8.8505				P23497	SP100	Nuclear autoantigen Sp-100	SP100_HUMAN	257.578	2168	8.00887
P23526	AHCY	Adenosylhomocysteinase	5086.92	205	12.3126				P23526	AHCY	Adenosylhomocysteinase	SAHH_HUMAN	8292.36	94	13.0176
P23528	CFL1	Cofilin-1	23347.3	28	14.511				P23528	CFL1	Cofilin-1	COF1_HUMAN	19958.7	30	14.2847
P23588	EIF4B	Eukaryotic translation initiation factor 4B	2759.3	417	11.4301				P23588	EIF4B	Eukaryotic translation initiation factor 4B	IF4B_HUMAN	2598.41	386	11.3434
P23919	DTYMK	Thymidylate kinase	2094.94	542	11.0327				P23919	DTYMK	Thymidylate kinase	KTHY_HUMAN	1209.68	774	10.2404
P23921	RRM1	Ribonucleoside-diphosphate reductase large subunit	1262.23	839	10.3018				P23921	RRM1	Ribonucleoside-diphosphate reductase large subunit	RIR1_HUMAN	841.778	1004	9.7173
P24534	EEF1B2	Elongation factor 1-beta	15461	45	13.9163				P24534	EEF1B2	Elongation factor 1-beta	EF1B_HUMAN	10213.3	68	13.3182
P24539	ATP5PB	ATP synthase F(0) complex subunit B1, mitochondrial	125.01	2818	6.9659				P24539	ATP5PB	ATP synthase F(0) complex subunit B1, mitochondrial	AT5F1_HUMAN	92.2478	2947	6.52744
P24666	ACP1	Low molecular weight phosphotyrosine protein phosphatase	685.748	1285	9.42154				P24666	ACP1	Low molecular weight phosphotyrosine protein phosphatase	PPAC_HUMAN	583.346	1305	9.18821
P24752	ACAT1	Acetyl-CoA acetyltransferase, mitochondrial	1483.8	736	10.5351				P24752	ACAT1	Acetyl-CoA acetyltransferase, mitochondrial	THIL_HUMAN	1977.72	511	10.9496
P24844	MYL9	Myosin regulatory light polypeptide 9	6505.07	142	12.6673				P24844	MYL9	Myosin regulatory light polypeptide 9	MYL9_HUMAN	6498.11	128	12.6658
P24928	POLR2A	DNA-directed RNA polymerase II subunit RPB1	317.304	2072	8.30972				P24928	POLR2A	DNA-directed RNA polymerase II subunit RPB1	RPB1_HUMAN	277.438	2089	8.11602
P24941	CDK2	Cyclin-dependent kinase 2	1204.05	862	10.2337				P24941	CDK2	Cyclin-dependent kinase 2	CDK2_HUMAN	998.44	890	9.96353
P25098	GRK2	Beta-adrenergic receptor kinase 1	1	3167.5	0				P25098	GRK2	Beta-adrenergic receptor kinase 1	ARBK1_HUMAN	670.347	1174	9.38876
P25205	MCM3	DNA replication licensing factor MCM3	2108.77	540	11.0422				P25205	MCM3	DNA replication licensing factor MCM3	MCM3_HUMAN	2043.73	494	10.997
P25325	MPST	3-mercaptopyruvate sulfurtransferase	307.116	2104	8.26264				P25325	MPST	3-mercaptopyruvate sulfurtransferase	THTM_HUMAN	250.455	2199	7.96841
P25398	RPS12	40S ribosomal protein S12	8847.99	99	13.1111				P25398	RPS12	40S ribosomal protein S12	RS12_HUMAN	9206.3	83	13.1684
P25490	YY1	Transcriptional repressor protein YY1	337.018	2009	8.39668				P25490	YY1	Transcriptional repressor protein YY1	TYY1_HUMAN	489.697	1495	8.93574
P25685	DNAJB1	DnaJ homolog subfamily B member 1	2056.67	552	11.0061				P25685	DNAJB1	DnaJ homolog subfamily B member 1	DNJB1_HUMAN	1655.47	596	10.693
P25705	ATP5F1A	ATP synthase subunit alpha, mitochondrial	7661.8	119	12.9035				P25705	ATP5F1A	ATP synthase subunit alpha, mitochondrial	ATPA_HUMAN	6159.21	139	12.5885
P25786	PSMA1	Proteasome subunit alpha type-1	3304.82	349	11.6904				P25786	PSMA1	Proteasome subunit alpha type-1	PSA1_HUMAN	1809.21	557	10.8211
P25787	PSMA2	Proteasome subunit alpha type-2	2229.1	512	11.1222				P25787	PSMA2	Proteasome subunit alpha type-2	PSA2_HUMAN	2140.02	475	11.0634
P25788	PSMA3	Proteasome subunit alpha type-3	4229.77	256	12.0464				P25788	PSMA3	Proteasome subunit alpha type-3	PSA3_HUMAN	4244.52	221	12.0514
P25789	PSMA4	Proteasome subunit alpha type-4	5572.67	184	12.4442				P25789	PSMA4	Proteasome subunit alpha type-4	PSA4_HUMAN	5154.13	172	12.3315
P26006	ITGA3	Integrin alpha-3	4389.22	246	12.0997				P26006	ITGA3	Integrin alpha-3	ITA3_HUMAN	3622.75	269	11.8229
P26038	MSN	Moesin	6384.59	149	12.6404				P26038	MSN	Moesin	MOES_HUMAN	5135.41	175	12.3263
P26196	DDX6	Probable ATP-dependent RNA helicase DDX6	643.292	1333	9.32933				P26196	DDX6	Probable ATP-dependent RNA helicase DDX6	DDX6_HUMAN	455.758	1562	8.83212
P26358	DNMT1	DNA (cytosine-5)-methyltransferase 1	1103.8	915	10.1083				P26358	DNMT1	DNA (cytosine-5)-methyltransferase 1	DNMT1_HUMAN	923.14	938	9.85041
P26368	U2AF2	Splicing factor U2AF 65 kDa subunit	2780.73	411	11.4412				P26368	U2AF2	Splicing factor U2AF 65 kDa subunit	U2AF2_HUMAN	1832.52	547	10.8396
P26373	RPL13	60S ribosomal protein L13	5955.35	164	12.54				P26373	RPL13	60S ribosomal protein L13	RL13_HUMAN	9220.62	82	13.1706
P26440	IVD	Isovaleryl-CoA dehydrogenase, mitochondrial	164.377	2643	7.36086				P26440	IVD	Isovaleryl-CoA dehydrogenase, mitochondrial	IVD_HUMAN	202.937	2418	7.66489
P26447	S100A4	Protein S100-A4	6720.71	138	12.7144				P26447	S100A4	Protein S100-A4	S10A4_HUMAN	4387.36	210	12.0991
P26583	HMGB2	High mobility group protein B2	1774.01	640	10.7928				P26583	HMGB2	High mobility group protein B2	HMGB2_HUMAN	1324.39	723	10.3711
P26599	PTBP1	Polypyrimidine tract-binding protein 1	3635.91	314	11.8281				P26599	PTBP1	Polypyrimidine tract-binding protein 1	PTBP1_HUMAN	6465.43	129	12.6585
P26639	TARS	Threonine--tRNA ligase, cytoplasmic	4652.77	229	12.1839				P26639	TARS	Threonine--tRNA ligase, cytoplasmic	SYTC_HUMAN	4639.85	204	12.1799
P26640	VARS	Valine--tRNA ligase	1363.12	787	10.4127				P26640	VARS	Valine--tRNA ligase	SYVC_HUMAN	2160.21	473	11.077
P26641	EEF1G	Elongation factor 1-gamma	4540.04	238	12.1485				P26641	EEF1G	Elongation factor 1-gamma	EF1G_HUMAN	7748.08	103	12.9196
P27144	AK4	Adenylate kinase 4, mitochondrial	211.911	2440	7.72732				P27144	AK4	Adenylate kinase 4, mitochondrial	KAD4_HUMAN	376.699	1746	8.55727
P27348	YWHAQ	14-3-3 protein theta	2148.36	533	11.069				P27348	YWHAQ	14-3-3 protein theta	1433T_HUMAN	3160.89	308	11.6261
P27361	MAPK3	Mitogen-activated protein kinase 3	397.753	1820	8.63573				P27361	MAPK3	Mitogen-activated protein kinase 3	MK03_HUMAN	315.858	1951	8.30313
P27635	RPL10	60S ribosomal protein L10	1832.36	625	10.8395				P27635	RPL10	60S ribosomal protein L10	RL10_HUMAN	1237.73	759	10.2735
P27694	RPA1	Replication protein A 70 kDa DNA-binding subunit	1656.15	673	10.6936				P27694	RPA1	Replication protein A 70 kDa DNA-binding subunit	RFA1_HUMAN	1209.12	775	10.2397
P27695	APEX1	DNA-(apurinic or apyrimidinic site) lyase	3750.67	298	11.8729				P27695	APEX1	DNA-(apurinic or apyrimidinic site) lyase	APEX1_HUMAN	2365.06	432	11.2077
P27701	CD82	CD82 antigen	227.45	2381	7.8294				P27701	CD82	CD82 antigen	CD82_HUMAN	184.847	2511	7.53019
P27707	DCK	Deoxycytidine kinase	320.987	2063	8.32637				P27707	DCK	Deoxycytidine kinase	DCK_HUMAN	523.573	1427	9.03225
P27708	CAD	CAD protein	1665.4	670	10.7017				P27708	CAD	CAD protein	PYR1_HUMAN	1659.35	595	10.6964
P27797	CALR	Calreticulin	5197.98	199	12.3437				P27797	CALR	Calreticulin	CALR_HUMAN	611.658	1248	9.25658
P27816	MAP4	Microtubule-associated protein 4	2889.28	397	11.4965				P27816	MAP4	Microtubule-associated protein 4	MAP4_HUMAN	3134.79	310	11.6142
P27824	CANX	Calnexin	2327.98	491	11.1849				P27824	CANX	Calnexin	CALX_HUMAN	1159.09	806	10.1788
P28062	PSMB8	Proteasome subunit beta type-8	355.435	1940	8.47344				P28062	PSMB8	Proteasome subunit beta type-8	PSB8_HUMAN	270.093	2112	8.07731
P28065	PSMB9	Proteasome subunit beta type-9	158.394	2666	7.30737				P28065	PSMB9	Proteasome subunit beta type-9	PSB9_HUMAN	322.874	1923	8.33483
P28066	PSMA5	Proteasome subunit alpha type-5	3693.59	303	11.8508				P28066	PSMA5	Proteasome subunit alpha type-5	PSA5_HUMAN	2653.46	378	11.3737
P28070	PSMB4	Proteasome subunit beta type-4	2900.07	396	11.5019				P28070	PSMB4	Proteasome subunit beta type-4	PSB4_HUMAN	2759.41	359	11.4301
P28072	PSMB6	Proteasome subunit beta type-6	5625.19	179	12.4577				P28072	PSMB6	Proteasome subunit beta type-6	PSB6_HUMAN	4714.84	197	12.203
P28074	PSMB5	Proteasome subunit beta type-5	2190.78	517	11.0972				P28074	PSMB5	Proteasome subunit beta type-5	PSB5_HUMAN	1551.15	631	10.5991
P28288	ABCD3	ATP-binding cassette sub-family D member 3	222.068	2396	7.79486				P28288	ABCD3	ATP-binding cassette sub-family D member 3	ABCD3_HUMAN	213.184	2370	7.73596
P28290	ITPRID2	Protein ITPRID2	64.7169	3053	6.01607				P28290	ITPRID2	Protein ITPRID2	ITPI2_HUMAN	88.89	2961	6.47395
P28331	NDUFS1	NADH-ubiquinone oxidoreductase 75 kDa subunit, mitochondrial	295.293	2139	8.206				P28331	NDUFS1	NADH-ubiquinone oxidoreductase 75 kDa subunit, mitochondrial	NDUS1_HUMAN	399.044	1680	8.6404
P28340	POLD1	DNA polymerase delta catalytic subunit	352.712	1955	8.46235				P28340	POLD1	DNA polymerase delta catalytic subunit	DPOD1_HUMAN	342.436	1847	8.41969
P28370	SMARCA1	Probable global transcription activator SNF2L1	825.449	1115	9.68903				P28370	SMARCA1	Probable global transcription activator SNF2L1	SMCA1_HUMAN	244.326	2226	7.93266
P28482	MAPK1	Mitogen-activated protein kinase 1	1725.96	654	10.7532				P28482	MAPK1	Mitogen-activated protein kinase 1	MK01_HUMAN	1639.86	601	10.6794
P28676	GCA	Grancalcin	198.777	2486	7.63501				P28676	GCA	Grancalcin	GRAN_HUMAN	115.457	2832	6.85122
P28799	GRN	Progranulin	260.716	2254	8.02634				P28799	GRN	Progranulin	GRN_HUMAN	178.798	2539	7.48218
P28838	LAP3	Cytosol aminopeptidase	2001.5	571	10.9669				P28838	LAP3	Cytosol aminopeptidase	AMPL_HUMAN	2081.08	488	11.0231
P29034	S100A2	Protein S100-A2	3180.77	361	11.6352				P29034	S100A2	Protein S100-A2	S10A2_HUMAN	4913.35	183	12.2625
P29084	GTF2E2	Transcription initiation factor IIE subunit beta	123.061	2825	6.94323				P29084	GTF2E2	Transcription initiation factor IIE subunit beta	T2EB_HUMAN	39.4196	3131	5.30084
P29144	TPP2	Tripeptidyl-peptidase 2	701.892	1261	9.45511				P29144	TPP2	Tripeptidyl-peptidase 2	TPP2_HUMAN	276.521	2093	8.11125
P29218	IMPA1	Inositol monophosphatase 1	890.99	1059	9.79926				P29218	IMPA1	Inositol monophosphatase 1	IMPA1_HUMAN	1044.64	866	10.0288
P29279	CTGF	Connective tissue growth factor	492.322	1584	8.94346				P29279	CTGF	Connective tissue growth factor	CTGF_HUMAN	367.297	1771	8.5208
P29317	EPHA2	Ephrin type-A receptor 2	7447.63	123	12.8626				P29317	EPHA2	Ephrin type-A receptor 2	EPHA2_HUMAN	3995.73	237	11.9642
P29401	TKT	Transketolase	5125.29	203	12.3234				P29401	TKT	Transketolase	TKT_HUMAN	4841.72	189	12.2413
P29558	RBMS1	RNA-binding motif, single-stranded-interacting protein 1	163.565	2649	7.35372				P29558	RBMS1	RNA-binding motif, single-stranded-interacting protein 1	RBMS1_HUMAN	658.858	1188	9.36382
P29590	PML	Protein PML	559.988	1469	9.12925				P29590	PML	Protein PML	PML_HUMAN	392.016	1695	8.61477
P29692	EEF1D	Elongation factor 1-delta	12480.6	65	13.6074				P29692	EEF1D	Elongation factor 1-delta	EF1D_HUMAN	14025.6	43	13.7758
P29966	MARCKS	Myristoylated alanine-rich C-kinase substrate	2538.15	449	11.3096				P29966	MARCKS	Myristoylated alanine-rich C-kinase substrate	MARCS_HUMAN	2365.13	431	11.2077
P29992	GNA11	Guanine nucleotide-binding protein subunit alpha-11	640.12	1338	9.3222				P29992	GNA11	Guanine nucleotide-binding protein subunit alpha-11	GNA11_HUMAN	1025.39	878	10.002
P30040	ERP29	Endoplasmic reticulum resident protein 29	4597.64	235	12.1667				P30040	ERP29	Endoplasmic reticulum resident protein 29	ERP29_HUMAN	3188.86	307	11.6388
P30041	PRDX6	Peroxiredoxin-6	11025.8	76	13.4286				P30041	PRDX6	Peroxiredoxin-6	PRDX6_HUMAN	9364.97	78	13.1931
P30043	BLVRB	Flavin reductase (NADPH)	538.756	1510	9.07349				P30043	BLVRB	Flavin reductase (NADPH)	BLVRB_HUMAN	569.046	1332	9.1524
P30044	PRDX5	Peroxiredoxin-5, mitochondrial	2301.43	498	11.1683				P30044	PRDX5	Peroxiredoxin-5, mitochondrial	PRDX5_HUMAN	3115.24	313	11.6051
P30046	DDT	D-dopachrome decarboxylase	718.88	1233	9.48961				P30046	DDT	D-dopachrome decarboxylase	DOPD_HUMAN	533.817	1411	9.0602
P30048	PRDX3	Thioredoxin-dependent peroxide reductase, mitochondrial	3868.47	288	11.9175				P30048	PRDX3	Thioredoxin-dependent peroxide reductase, mitochondrial	PRDX3_HUMAN	1859.88	537	10.861
P30049	ATP5F1D	ATP synthase subunit delta, mitochondrial	1015.51	968	9.98799				P30049	ATP5F1D	ATP synthase subunit delta, mitochondrial	ATPD_HUMAN	737.827	1097	9.52714
P30050	RPL12	60S ribosomal protein L12	3120.09	371	11.6074				P30050	RPL12	60S ribosomal protein L12	RL12_HUMAN	8409.7	90	13.0378
P30084	ECHS1	Enoyl-CoA hydratase, mitochondrial	931.943	1022	9.8641				P30084	ECHS1	Enoyl-CoA hydratase, mitochondrial	ECHM_HUMAN	512.028	1449	9.00008
P30085	CMPK1	UMP-CMP kinase	2031.27	563	10.9882				P30085	CMPK1	UMP-CMP kinase	KCY_HUMAN	1163.84	801	10.1847
P30086	PEBP1	Phosphatidylethanolamine-binding protein 1	5264.27	195	12.362				P30086	PEBP1	Phosphatidylethanolamine-binding protein 1	PEBP1_HUMAN	3790.82	251	11.8883
P30101	PDIA3	Protein disulfide-isomerase A3	5939.65	166	12.5362				P30101	PDIA3	Protein disulfide-isomerase A3	PDIA3_HUMAN	6787.85	123	12.7287
P30153	PPP2R1A	Serine/threonine-protein phosphatase 2A 65 kDa regulatory subunit A alpha isoform	2599.07	437	11.3438				P30153	PPP2R1A	Serine/threonine-protein phosphatase 2A 65 kDa regulatory subunit A alpha isoform	2AAA_HUMAN	2447.61	410	11.2572
P30154	PPP2R1B	Serine/threonine-protein phosphatase 2A 65 kDa regulatory subunit A beta isoform	43.6659	3107	5.44843				P30154	PPP2R1B	Serine/threonine-protein phosphatase 2A 65 kDa regulatory subunit A beta isoform	2AAB_HUMAN	234.752	2281	7.87499
P30260	CDC27	Cell division cycle protein 27 homolog	307.243	2102	8.26324				P30260	CDC27	Cell division cycle protein 27 homolog	CDC27_HUMAN	286.632	2050	8.16306
P30405	PPIF	Peptidyl-prolyl cis-trans isomerase F, mitochondrial	346.872	1975	8.43826				P30405	PPIF	Peptidyl-prolyl cis-trans isomerase F, mitochondrial	PPIF_HUMAN	166.078	2598	7.37571
P30419	NMT1	Glycylpeptide N-tetradecanoyltransferase 1	710.6	1249	9.47289				P30419	NMT1	Glycylpeptide N-tetradecanoyltransferase 1	NMT1_HUMAN	847.141	1003	9.72646
P30519	HMOX2	Heme oxygenase 2	331.353	2030	8.37222				P30519	HMOX2	Heme oxygenase 2	HMOX2_HUMAN	54.0633	3096	5.75658
P30520	ADSS	Adenylosuccinate synthetase isozyme 2	1459.38	748	10.5111				P30520	ADSS	Adenylosuccinate synthetase isozyme 2	PURA2_HUMAN	804.08	1030	9.65119
P30530	AXL	Tyrosine-protein kinase receptor UFO	758.587	1178	9.56717				P30530	AXL	Tyrosine-protein kinase receptor UFO	UFO_HUMAN	901.454	956	9.81611
P30533	LRPAP1	Alpha-2-macroglobulin receptor-associated protein	483.489	1603	8.91734				P30533	LRPAP1	Alpha-2-macroglobulin receptor-associated protein	AMRP_HUMAN	332.348	1891	8.37655
P30566	ADSL	Adenylosuccinate lyase	512.961	1547	9.0027				P30566	ADSL	Adenylosuccinate lyase	PUR8_HUMAN	650.973	1198	9.34645
P30622	CLIP1	CAP-Gly domain-containing linker protein 1	281.548	2182	8.13724				P30622	CLIP1	CAP-Gly domain-containing linker protein 1	CLIP1_HUMAN	332.483	1890	8.37714
P30626	SRI	Sorcin	2545.08	448	11.3135				P30626	SRI	Sorcin	SORCN_HUMAN	2481.82	402	11.2772
P30740	SERPINB1	Leukocyte elastase inhibitor	821.423	1124	9.68198				P30740	SERPINB1	Leukocyte elastase inhibitor	ILEU_HUMAN	826.596	1010	9.69104
P30825	SLC7A1	High affinity cationic amino acid transporter 1	748.758	1186	9.54836				P30825	SLC7A1	High affinity cationic amino acid transporter 1	CTR1_HUMAN	507.299	1462	8.98669
P30837	ALDH1B1	Aldehyde dehydrogenase X, mitochondrial	67.908	3041	6.08551				P30837	ALDH1B1	Aldehyde dehydrogenase X, mitochondrial	AL1B1_HUMAN	240.206	2247	7.90813
P30876	POLR2B	DNA-directed RNA polymerase II subunit RPB2	456.56	1663	8.83466				P30876	POLR2B	DNA-directed RNA polymerase II subunit RPB2	RPB2_HUMAN	495.778	1487	8.95355
P31040	SDHA	Succinate dehydrogenase [ubiquinone] flavoprotein subunit, mitochondrial	819.003	1126	9.67773				P31040	SDHA	Succinate dehydrogenase [ubiquinone] flavoprotein subunit, mitochondrial	SDHA_HUMAN	619.775	1239	9.2756
P31150	GDI1	Rab GDP dissociation inhibitor alpha	1070.19	941	10.0636				P31150	GDI1	Rab GDP dissociation inhibitor alpha	GDIA_HUMAN	358.674	1800	8.48653
P31153	MAT2A	S-adenosylmethionine synthase isoform type-2	1208.54	860	10.239				P31153	MAT2A	S-adenosylmethionine synthase isoform type-2	METK2_HUMAN	974.963	903	9.9292
P31350	RRM2	Ribonucleoside-diphosphate reductase subunit M2	538.23	1511	9.07208				P31350	RRM2	Ribonucleoside-diphosphate reductase subunit M2	RIR2_HUMAN	533.557	1413	9.0595
P31689	DNAJA1	DnaJ homolog subfamily A member 1	859.544	1091	9.74743				P31689	DNAJA1	DnaJ homolog subfamily A member 1	DNJA1_HUMAN	1200.98	778	10.23
P31930	UQCRC1	Cytochrome b-c1 complex subunit 1, mitochondrial	1166.74	882	10.1883				P31930	UQCRC1	Cytochrome b-c1 complex subunit 1, mitochondrial	QCR1_HUMAN	864.267	986	9.75533
P31937	HIBADH	3-hydroxyisobutyrate dehydrogenase, mitochondrial	323.722	2051	8.33861				P31937	HIBADH	3-hydroxyisobutyrate dehydrogenase, mitochondrial	3HIDH_HUMAN	339.296	1864	8.4064
P31939	ATIC	Bifunctional purine biosynthesis protein PURH	3681.19	306	11.846				P31939	ATIC	Bifunctional purine biosynthesis protein PURH	PUR9_HUMAN	2913.63	341	11.5086
P31942	HNRNPH3	Heterogeneous nuclear ribonucleoprotein H3	1372.54	783	10.4226				P31942	HNRNPH3	Heterogeneous nuclear ribonucleoprotein H3	HNRH3_HUMAN	1511.77	643	10.562
P31943	HNRNPH1	Heterogeneous nuclear ribonucleoprotein H	5829.77	171	12.5092				P31943	HNRNPH1	Heterogeneous nuclear ribonucleoprotein H	HNRH1_HUMAN	4219.01	223	12.0427
P31946	YWHAB	14-3-3 protein beta/alpha	11240.8	73	13.4565				P31946	YWHAB	14-3-3 protein beta/alpha	1433B_HUMAN	12352.6	46	13.5925
P31947	SFN	14-3-3 protein sigma	2366.87	483	11.2088				P31947	SFN	14-3-3 protein sigma	1433S_HUMAN	1604.23	615	10.6477
P31948	STIP1	Stress-induced-phosphoprotein 1	5103.37	204	12.3172				P31948	STIP1	Stress-induced-phosphoprotein 1	STIP1_HUMAN	3028.9	328	11.5646
P31949	S100A11	Protein S100-A11	8587.17	105	13.068				P31949	S100A11	Protein S100-A11	S10AB_HUMAN	5776.66	155	12.496
P32119	PRDX2	Peroxiredoxin-2	4157.09	263	12.0214				P32119	PRDX2	Peroxiredoxin-2	PRDX2_HUMAN	4388.18	209	12.0994
P32321	DCTD	Deoxycytidylate deaminase	589.7	1408	9.20384				P32321	DCTD	Deoxycytidylate deaminase	DCTD_HUMAN	466.011	1545	8.86422
P32322	PYCR1	Pyrroline-5-carboxylate reductase 1, mitochondrial	299.907	2124	8.22837				P32322	PYCR1	Pyrroline-5-carboxylate reductase 1, mitochondrial	P5CR1_HUMAN	385.517	1716	8.59065
P32455	GBP1	Guanylate-binding protein 1	216.248	2421	7.75655				P32455	GBP1	Guanylate-binding protein 1	GBP1_HUMAN	3029.36	327	11.5648
P32929	CTH	Cystathionine gamma-lyase	224.582	2388	7.8111				P32929	CTH	Cystathionine gamma-lyase	CGL_HUMAN	158.289	2631	7.30641
P32969	RPL9	60S ribosomal protein L9	5899.22	168	12.5263				P32969	RPL9	60S ribosomal protein L9	RL9_HUMAN	3394.91	287	11.7292
P33121	ACSL1	Long-chain-fatty-acid--CoA ligase 1	299.934	2123	8.2285				P33121	ACSL1	Long-chain-fatty-acid--CoA ligase 1	ACSL1_HUMAN	291.943	2031	8.18954
P33176	KIF5B	Kinesin-1 heavy chain	3411.45	337	11.7362				P33176	KIF5B	Kinesin-1 heavy chain	KINH_HUMAN	3205.11	304	11.6462
P33240	CSTF2	Cleavage stimulation factor subunit 2	1041.19	954	10.024				P33240	CSTF2	Cleavage stimulation factor subunit 2	CSTF2_HUMAN	947.203	921	9.88753
P33316	DUT	Deoxyuridine 5'-triphosphate nucleotidohydrolase, mitochondrial	2236.48	508	11.127				P33316	DUT	Deoxyuridine 5'-triphosphate nucleotidohydrolase, mitochondrial	DUT_HUMAN	2026.16	498	10.9845
P33527	ABCC1	Multidrug resistance-associated protein 1	96.2868	2938	6.58927				P33527	ABCC1	Multidrug resistance-associated protein 1	MRP1_HUMAN	133.002	2755	7.0553
P33991	MCM4	DNA replication licensing factor MCM4	1802.99	636	10.8162				P33991	MCM4	DNA replication licensing factor MCM4	MCM4_HUMAN	1867.65	533	10.867
P33992	MCM5	DNA replication licensing factor MCM5	1224.22	852	10.2576				P33992	MCM5	DNA replication licensing factor MCM5	MCM5_HUMAN	1030.55	874	10.0092
P33993	MCM7	DNA replication licensing factor MCM7	1322	806	10.3685				P33993	MCM7	DNA replication licensing factor MCM7	MCM7_HUMAN	1681.21	589	10.7153
P34896	SHMT1	Serine hydroxymethyltransferase, cytosolic	466.187	1632	8.86476				P34896	SHMT1	Serine hydroxymethyltransferase, cytosolic	GLYC_HUMAN	391.263	1696	8.612
P34897	SHMT2	Serine hydroxymethyltransferase, mitochondrial	5239.7	196	12.3553				P34897	SHMT2	Serine hydroxymethyltransferase, mitochondrial	GLYM_HUMAN	2935.23	340	11.5193
P34910	EVI2B	Protein EVI2B	209.206	2458	7.70878				P34910	EVI2B	Protein EVI2B	EVI2B_HUMAN	148.803	2687	7.21726
P34932	HSPA4	Heat shock 70 kDa protein 4	3583.47	320	11.8071				P34932	HSPA4	Heat shock 70 kDa protein 4	HSP74_HUMAN	3383.29	289	11.7242
P35080	PFN2	Profilin-2	386.574	1846	8.5946				P35080	PFN2	Profilin-2	PROF2_HUMAN	395.762	1693	8.62849
P35221	CTNNA1	Catenin alpha-1	1903.93	599	10.8948				P35221	CTNNA1	Catenin alpha-1	CTNA1_HUMAN	1017.6	882	9.99095
P35222	CTNNB1	Catenin beta-1	171.405	2613	7.42127				P35222	CTNNB1	Catenin beta-1	CTNB1_HUMAN	195.662	2462	7.61222
P35232	PHB	Prohibitin	3504	330	11.7748				P35232	PHB	Prohibitin	PHB_HUMAN	3818.23	249	11.8987
P35237	SERPINB6	Serpin B6	1368.11	786	10.418				P35237	SERPINB6	Serpin B6	SPB6_HUMAN	1097.24	842	10.0997
P35241	RDX	Radixin	10792.4	77	13.3977				P35241	RDX	Radixin	RADI_HUMAN	6995.05	117	12.7721
P35244	RPA3	Replication protein A 14 kDa subunit	808.525	1137	9.65915				P35244	RPA3	Replication protein A 14 kDa subunit	RFA3_HUMAN	561.828	1345	9.13399
P35249	RFC4	Replication factor C subunit 4	823.885	1118	9.6863				P35249	RFC4	Replication factor C subunit 4	RFC4_HUMAN	1121.59	822	10.1313
P35250	RFC2	Replication factor C subunit 2	1073.41	939	10.068				P35250	RFC2	Replication factor C subunit 2	RFC2_HUMAN	1110.62	830	10.1171
P35251	RFC1	Replication factor C subunit 1	93.5021	2946	6.54693				P35251	RFC1	Replication factor C subunit 1	RFC1_HUMAN	100.167	2906	6.64627
P35268	RPL22	60S ribosomal protein L22	14534.7	49	13.8272				P35268	RPL22	60S ribosomal protein L22	RL22_HUMAN	22693.3	26	14.47
P35269	GTF2F1	General transcription factor IIF subunit 1	834.024	1106	9.70394				P35269	GTF2F1	General transcription factor IIF subunit 1	T2FA_HUMAN	547.488	1372	9.09668
P35270	SPR	Sepiapterin reductase	504.567	1560	8.9789				P35270	SPR	Sepiapterin reductase	SPRE_HUMAN	605.12	1265	9.24108
P35527	KRT9	Keratin, type I cytoskeletal 9	139.184	2746	7.12085				P35527	KRT9	Keratin, type I cytoskeletal 9	K1C9_HUMAN	276.092	2097	8.109
P35568	IRS1	Insulin receptor substrate 1	174.059	2601	7.44343				P35568	IRS1	Insulin receptor substrate 1	IRS1_HUMAN	62.7726	3068	5.97206
P35573	AGL	Glycogen debranching enzyme	52.1625	3092	5.70494				P35573	AGL	Glycogen debranching enzyme	GDE_HUMAN	1019.4	881	9.99351
P35579	MYH9	Myosin-9	8551.08	106	13.0619				P35579	MYH9	Myosin-9	MYH9_HUMAN	10176	69	13.3129
P35580	MYH10	Myosin-10	421.285	1754	8.71865				P35580	MYH10	Myosin-10	MYH10_HUMAN	225.311	2318	7.81578
P35606	COPB2	Coatomer subunit beta'	625.102	1360	9.28795				P35606	COPB2	Coatomer subunit beta'	COPB2_HUMAN	1196.49	782	10.2246
P35610	SOAT1	Sterol O-acyltransferase 1	484.611	1600	8.92068				P35610	SOAT1	Sterol O-acyltransferase 1	SOAT1_HUMAN	355.324	1815	8.47299
P35611	ADD1	Alpha-adducin	305.292	2111	8.25405				P35611	ADD1	Alpha-adducin	ADDA_HUMAN	254.347	2178	7.99065
P35613	BSG	Basigin	3163.02	366	11.6271				P35613	BSG	Basigin	BASI_HUMAN	2407.49	421	11.2333
P35625	TIMP3	Metalloproteinase inhibitor 3	262.604	2246	8.03675				P35625	TIMP3	Metalloproteinase inhibitor 3	TIMP3_HUMAN	214.448	2359	7.74448
P35637	FUS	RNA-binding protein FUS	1897.62	603	10.89				P35637	FUS	RNA-binding protein FUS	FUS_HUMAN	3652.66	262	11.8347
P35658	NUP214	Nuclear pore complex protein Nup214	304.284	2113	8.24928				P35658	NUP214	Nuclear pore complex protein Nup214	NU214_HUMAN	161.334	2618	7.33391
P35659	DEK	Protein DEK	2718.26	422	11.4085				P35659	DEK	Protein DEK	DEK_HUMAN	1796.87	563	10.8113
P35754	GLRX	Glutaredoxin-1	726.503	1227	9.50482				P35754	GLRX	Glutaredoxin-1	GLRX1_HUMAN	471.409	1535	8.88084
P35813	PPM1A	Protein phosphatase 1A	205.078	2468	7.68003				P35813	PPM1A	Protein phosphatase 1A	PPM1A_HUMAN	195.299	2464	7.60954
P35998	PSMC2	26S proteasome regulatory subunit 7	3677.77	307	11.8446				P35998	PSMC2	26S proteasome regulatory subunit 7	PRS7_HUMAN	3806.76	250	11.8943
P36404	ARL2	ADP-ribosylation factor-like protein 2	261.363	2251	8.02991				P36404	ARL2	ADP-ribosylation factor-like protein 2	ARL2_HUMAN	432.92	1604	8.75796
P36405	ARL3	ADP-ribosylation factor-like protein 3	725.166	1228	9.50217				P36405	ARL3	ADP-ribosylation factor-like protein 3	ARL3_HUMAN	747.278	1089	9.5455
P36507	MAP2K2	Dual specificity mitogen-activated protein kinase kinase 2	1788.11	638	10.8042				P36507	MAP2K2	Dual specificity mitogen-activated protein kinase kinase 2	MP2K2_HUMAN	459.442	1557	8.84374
P36542	ATP5F1C	ATP synthase subunit gamma, mitochondrial	1524.46	717	10.5741				P36542	ATP5F1C	ATP synthase subunit gamma, mitochondrial	ATPG_HUMAN	1270.7	749	10.3114
P36543	ATP6V1E1	V-type proton ATPase subunit E 1	814.367	1133	9.66954				P36543	ATP6V1E1	V-type proton ATPase subunit E 1	VATE1_HUMAN	332.307	1892	8.37637
P36551	CPOX	Oxygen-dependent coproporphyrinogen-III oxidase, mitochondrial	1197.03	866	10.2252				P36551	CPOX	Oxygen-dependent coproporphyrinogen-III oxidase, mitochondrial	HEM6_HUMAN	638.61	1210	9.31879
P36578	RPL4	60S ribosomal protein L4	4394.76	245	12.1016				P36578	RPL4	60S ribosomal protein L4	RL4_HUMAN	4336.26	214	12.0822
P36639	NUDT1	7,8-dihydro-8-oxoguanine triphosphatase	301.842	2120	8.23765				P36639	NUDT1	7,8-dihydro-8-oxoguanine triphosphatase	8ODP_HUMAN	154.779	2651	7.27406
P36776	LONP1	Lon protease homolog, mitochondrial	479.436	1615	8.90519				P36776	LONP1	Lon protease homolog, mitochondrial	LONM_HUMAN	525.999	1421	9.03892
P36871	PGM1	Phosphoglucomutase-1	2157.13	529	11.0749				P36871	PGM1	Phosphoglucomutase-1	PGM1_HUMAN	1795.71	564	10.8103
P36873	PPP1CC	Serine/threonine-protein phosphatase PP1-gamma catalytic subunit	1818.87	630	10.8288				P36873	PPP1CC	Serine/threonine-protein phosphatase PP1-gamma catalytic subunit	PP1G_HUMAN	1794.23	565	10.8092
P36915	GNL1	Guanine nucleotide-binding protein-like 1	66.1066	3049	6.04672				P36915	GNL1	Guanine nucleotide-binding protein-like 1	GNL1_HUMAN	929.712	934	9.86064
P36954	POLR2I	DNA-directed RNA polymerase II subunit RPB9	755.851	1182	9.56196				P36954	POLR2I	DNA-directed RNA polymerase II subunit RPB9	RPB9_HUMAN	550.58	1367	9.10481
P36957	DLST	Dihydrolipoyllysine-residue succinyltransferase component of 2-oxoglutarate dehydrogenase complex, mitochondrial	532.965	1523	9.0579				P36957	DLST	Dihydrolipoyllysine-residue succinyltransferase component of 2-oxoglutarate dehydrogenase complex, mitochondrial	ODO2_HUMAN	695.297	1141	9.44149
P36969	GPX4	Phospholipid hydroperoxide glutathione peroxidase	71.071	3032	6.15119				P36969	GPX4	Phospholipid hydroperoxide glutathione peroxidase	GPX4_HUMAN	193.998	2474	7.5999
P37108	SRP14	Signal recognition particle 14 kDa protein	1200.24	864	10.2291				P37108	SRP14	Signal recognition particle 14 kDa protein	SRP14_HUMAN	1186.41	789	10.2124
P37173	TGFBR2	TGF-beta receptor type-2	392.329	1831	8.61592				P37173	TGFBR2	TGF-beta receptor type-2	TGFR2_HUMAN	276.517	2094	8.11122
P37198	NUP62	Nuclear pore glycoprotein p62	714.859	1242	9.48152				P37198	NUP62	Nuclear pore glycoprotein p62	NUP62_HUMAN	750.891	1081	9.55246
P37235	HPCAL1	Hippocalcin-like protein 1	1471.91	739	10.5235				P37235	HPCAL1	Hippocalcin-like protein 1	HPCL1_HUMAN	1161.69	804	10.182
P37802	TAGLN2	Transgelin-2	3714.69	300	11.859				P37802	TAGLN2	Transgelin-2	TAGL2_HUMAN	3009.75	331	11.5554
P37837	TALDO1	Transaldolase	5999.71	162	12.5507				P37837	TALDO1	Transaldolase	TALDO_HUMAN	6608.33	127	12.6901
P38117	ETFB	Electron transfer flavoprotein subunit beta	1622.03	684	10.6636				P38117	ETFB	Electron transfer flavoprotein subunit beta	ETFB_HUMAN	1147.59	811	10.1644
P38159	RBMX	RNA-binding motif protein, X chromosome	4026.14	273	11.9752				P38159	RBMX	RNA-binding motif protein, X chromosome	RBMX_HUMAN	3419.29	285	11.7395
P38432	COIL	Coilin	5.67377	3159	2.50431				P38432	COIL	Coilin	COIL_HUMAN	250.835	2197	7.9706
P38606	ATP6V1A	V-type proton ATPase catalytic subunit A	1460.68	747	10.5124				P38606	ATP6V1A	V-type proton ATPase catalytic subunit A	VATA_HUMAN	973.06	905	9.92639
P38646	HSPA9	Stress-70 protein, mitochondrial	3315.4	348	11.695				P38646	HSPA9	Stress-70 protein, mitochondrial	GRP75_HUMAN	6652.83	126	12.6998
P38919	EIF4A3	Eukaryotic initiation factor 4A-III	3542.75	325	11.7907				P38919	EIF4A3	Eukaryotic initiation factor 4A-III	IF4A3_HUMAN	3074.87	319	11.5863
P39019	RPS19	40S ribosomal protein S19	5593.54	182	12.4495				P39019	RPS19	40S ribosomal protein S19	RS19_HUMAN	9117.83	84	13.1545
P39023	RPL3	60S ribosomal protein L3	5634.54	178	12.4601				P39023	RPL3	60S ribosomal protein L3	RL3_HUMAN	5340.25	167	12.3827
P39656	DDOST	Dolichyl-diphosphooligosaccharide--protein glycosyltransferase 48 kDa subunit	2523.64	452	11.3013				P39656	DDOST	Dolichyl-diphosphooligosaccharide--protein glycosyltransferase 48 kDa subunit	OST48_HUMAN	1903.95	525	10.8948
P39687	ANP32A	Acidic leucine-rich nuclear phosphoprotein 32 family member A	2686.23	426	11.3914				P39687	ANP32A	Acidic leucine-rich nuclear phosphoprotein 32 family member A	AN32A_HUMAN	2632.24	380	11.3621
P39748	FEN1	Flap endonuclease 1	1447.84	753	10.4997				P39748	FEN1	Flap endonuclease 1	FEN1_HUMAN	988.764	898	9.94948
P40121	CAPG	Macrophage-capping protein	2314.01	493	11.1762				P40121	CAPG	Macrophage-capping protein	CAPG_HUMAN	1642.81	600	10.682
P40123	CAP2	Adenylyl cyclase-associated protein 2	481.004	1610	8.90991				P40123	CAP2	Adenylyl cyclase-associated protein 2	CAP2_HUMAN	556.791	1358	9.12099
P40189	IL6ST	Interleukin-6 receptor subunit beta	131.08	2791	7.0343				P40189	IL6ST	Interleukin-6 receptor subunit beta	IL6RB_HUMAN	121.3	2809	6.92244
P40222	TXLNA	Alpha-taxilin	743.186	1195	9.53758				P40222	TXLNA	Alpha-taxilin	TXLNA_HUMAN	714.299	1125	9.48038
P40227	CCT6A	T-complex protein 1 subunit zeta	4955.07	212	12.2747				P40227	CCT6A	T-complex protein 1 subunit zeta	TCPZ_HUMAN	5265.96	169	12.3625
P40261	NNMT	Nicotinamide N-methyltransferase	280.276	2188	8.13071				P40261	NNMT	Nicotinamide N-methyltransferase	NNMT_HUMAN	246.638	2215	7.94625
P40429	RPL13A	60S ribosomal protein L13a	9446.2	87	13.2055				P40429	RPL13A	60S ribosomal protein L13a	RL13A_HUMAN	6955.05	119	12.7638
P40616	ARL1	ADP-ribosylation factor-like protein 1	359.476	1928	8.48975				P40616	ARL1	ADP-ribosylation factor-like protein 1	ARL1_HUMAN	686.075	1157	9.42222
P40692	MLH1	DNA mismatch repair protein Mlh1	84.7107	2988	6.40447				P40692	MLH1	DNA mismatch repair protein Mlh1	MLH1_HUMAN	78.785	3004	6.29985
P40763	STAT3	Signal transducer and activator of transcription 3	732.254	1216	9.5162				P40763	STAT3	Signal transducer and activator of transcription 3	STAT3_HUMAN	489.7	1494	8.93575
P40818	USP8	Ubiquitin carboxyl-terminal hydrolase 8	138.426	2751	7.11297				P40818	USP8	Ubiquitin carboxyl-terminal hydrolase 8	UBP8_HUMAN	135.448	2748	7.08159
P40855	PEX19	Peroxisomal biogenesis factor 19	299.833	2125	8.22802				P40855	PEX19	Peroxisomal biogenesis factor 19	PEX19_HUMAN	369.742	1767	8.53038
P40925	MDH1	Malate dehydrogenase, cytoplasmic	6477.82	144	12.6613				P40925	MDH1	Malate dehydrogenase, cytoplasmic	MDHC_HUMAN	3840.2	247	11.907
P40926	MDH2	Malate dehydrogenase, mitochondrial	3648.28	312	11.833				P40926	MDH2	Malate dehydrogenase, mitochondrial	MDHM_HUMAN	4170.4	228	12.026
P40937	RFC5	Replication factor C subunit 5	314.349	2082	8.29622				P40937	RFC5	Replication factor C subunit 5	RFC5_HUMAN	162.26	2615	7.34217
P40938	RFC3	Replication factor C subunit 3	546.854	1490	9.09501				P40938	RFC3	Replication factor C subunit 3	RFC3_HUMAN	473.935	1525	8.88855
P40939	HADHA	Trifunctional enzyme subunit alpha, mitochondrial	586.876	1412	9.19691				P40939	HADHA	Trifunctional enzyme subunit alpha, mitochondrial	ECHA_HUMAN	533.716	1412	9.05993
P41091	EIF2S3	Eukaryotic translation initiation factor 2 subunit 3	1057.4	945	10.0463				P41091	EIF2S3	Eukaryotic translation initiation factor 2 subunit 3	IF2G_HUMAN	932.41	930	9.86482
P41214	EIF2D	Eukaryotic translation initiation factor 2D	151.222	2688	7.24052				P41214	EIF2D	Eukaryotic translation initiation factor 2D	EIF2D_HUMAN	124.376	2792	6.95857
P41223	BUD31	Protein BUD31 homolog	462.532	1635	8.85341				P41223	BUD31	Protein BUD31 homolog	BUD31_HUMAN	149.426	2680	7.22329
P41227	NAA10	N-alpha-acetyltransferase 10	734.334	1208	9.52029				P41227	NAA10	N-alpha-acetyltransferase 10	NAA10_HUMAN	609.836	1255	9.25228
P41240	CSK	Tyrosine-protein kinase CSK	460.365	1646	8.84663				P41240	CSK	Tyrosine-protein kinase CSK	CSK_HUMAN	276.404	2095	8.11063
P41250	GARS	Glycine--tRNA ligase	5155.26	201	12.3318				P41250	GARS	Glycine--tRNA ligase	GARS_HUMAN	5233.04	171	12.3534
P41252	IARS	Isoleucine--tRNA ligase, cytoplasmic	2532.1	451	11.3061				P41252	IARS	Isoleucine--tRNA ligase, cytoplasmic	SYIC_HUMAN	2495.43	400	11.2851
P41567	EIF1	Eukaryotic translation initiation factor 1	1511.3	727	10.5616				P41567	EIF1	Eukaryotic translation initiation factor 1	EIF1_HUMAN	584.058	1303	9.18997
P42126	ECI1	Enoyl-CoA delta isomerase 1, mitochondrial	148.096	2707	7.21039				P42126	ECI1	Enoyl-CoA delta isomerase 1, mitochondrial	ECI1_HUMAN	119.353	2819	6.89909
P42166	TMPO	Lamina-associated polypeptide 2, isoform alpha	2727.27	421	11.4132				P42166	TMPO	Lamina-associated polypeptide 2, isoform alpha	LAP2A_HUMAN	1363.33	708	10.4129
P42167	TMPO	Lamina-associated polypeptide 2, isoforms beta/gamma	1810.62	633	10.8223				P42167	TMPO	Lamina-associated polypeptide 2, isoforms beta/gamma	LAP2B_HUMAN	1218.46	769	10.2508
P42224	STAT1	Signal transducer and activator of transcription 1-alpha/beta	552.056	1482	9.10867				P42224	STAT1	Signal transducer and activator of transcription 1-alpha/beta	STAT1_HUMAN	265.321	2132	8.0516
P42226	STAT6	Signal transducer and activator of transcription 6	62.087	3058	5.95622				P42226	STAT6	Signal transducer and activator of transcription 6	STAT6_HUMAN	305.113	1987	8.2532
P42285	MTREX	Exosome RNA helicase MTR4	324.21	2047	8.34078				P42285	MTREX	Exosome RNA helicase MTR4	MTREX_HUMAN	305.437	1985	8.25473
P42330	AKR1C3	Aldo-keto reductase family 1 member C3	417.938	1768	8.70715				P42330	AKR1C3	Aldo-keto reductase family 1 member C3	AK1C3_HUMAN	476.297	1521	8.89572
P42345	MTOR	Serine/threonine-protein kinase mTOR	247.033	2307	7.94856				P42345	MTOR	Serine/threonine-protein kinase mTOR	MTOR_HUMAN	228.724	2305	7.83746
P42566	EPS15	Epidermal growth factor receptor substrate 15	214.127	2431	7.74233				P42566	EPS15	Epidermal growth factor receptor substrate 15	EPS15_HUMAN	259.412	2161	8.0191
P42574	CASP3	Caspase-3	476.308	1620	8.89575				P42574	CASP3	Caspase-3	CASP3_HUMAN	1299.9	734	10.3442
P42677	RPS27	40S ribosomal protein S27	4731.01	225	12.2079				P42677	RPS27	40S ribosomal protein S27	RS27_HUMAN	3725.76	256	11.8633
P42696	RBM34	RNA-binding protein 34	93.5551	2945	6.54774				P42696	RBM34	RNA-binding protein 34	RBM34_HUMAN	251.9	2194	7.97671
P42704	LRPPRC	Leucine-rich PPR motif-containing protein, mitochondrial	1884.44	610	10.8799				P42704	LRPPRC	Leucine-rich PPR motif-containing protein, mitochondrial	LPPRC_HUMAN	931.504	932	9.86342
P42765	ACAA2	3-ketoacyl-CoA thiolase, mitochondrial	285.751	2167	8.15862				P42765	ACAA2	3-ketoacyl-CoA thiolase, mitochondrial	THIM_HUMAN	209.912	2383	7.71364
P42766	RPL35	60S ribosomal protein L35	10012	83	13.2894				P42766	RPL35	60S ribosomal protein L35	RL35_HUMAN	14654.4	40	13.839
P42892	ECE1	Endothelin-converting enzyme 1	784.587	1159	9.61579				P42892	ECE1	Endothelin-converting enzyme 1	ECE1_HUMAN	284.31	2065	8.15132
P43034	PAFAH1B1	Platelet-activating factor acetylhydrolase IB subunit alpha	1816.82	631	10.8272				P43034	PAFAH1B1	Platelet-activating factor acetylhydrolase IB subunit alpha	LIS1_HUMAN	1691.96	588	10.7245
P43121	MCAM	Cell surface glycoprotein MUC18	416.976	1772	8.70382				P43121	MCAM	Cell surface glycoprotein MUC18	MUC18_HUMAN	338.122	1870	8.4014
P43243	MATR3	Matrin-3	3373.99	344	11.7202				P43243	MATR3	Matrin-3	MATR3_HUMAN	2138.05	476	11.0621
P43246	MSH2	DNA mismatch repair protein Msh2	420.715	1756	8.7167				P43246	MSH2	DNA mismatch repair protein Msh2	MSH2_HUMAN	259.136	2163	8.01757
P43304	GPD2	Glycerol-3-phosphate dehydrogenase, mitochondrial	732.336	1215	9.51636				P43304	GPD2	Glycerol-3-phosphate dehydrogenase, mitochondrial	GPDM_HUMAN	513.411	1445	9.00397
P43487	RANBP1	Ran-specific GTPase-activating protein	3362.92	345	11.7155				P43487	RANBP1	Ran-specific GTPase-activating protein	RANG_HUMAN	2646.22	379	11.3697
P43490	NAMPT	Nicotinamide phosphoribosyltransferase	5566.7	185	12.4426				P43490	NAMPT	Nicotinamide phosphoribosyltransferase	NAMPT_HUMAN	4678.72	201	12.1919
P43686	PSMC4	26S proteasome regulatory subunit 6B	1637.14	681	10.677				P43686	PSMC4	26S proteasome regulatory subunit 6B	PRS6B_HUMAN	1044.48	867	10.0286
P43897	TSFM	Elongation factor Ts, mitochondrial	155.627	2676	7.28195				P43897	TSFM	Elongation factor Ts, mitochondrial	EFTS_HUMAN	99.2291	2910	6.63269
P45877	PPIC	Peptidyl-prolyl cis-trans isomerase C	131.223	2790	7.03587				P45877	PPIC	Peptidyl-prolyl cis-trans isomerase C	PPIC_HUMAN	65.7398	3062	6.03869
P45880	VDAC2	Voltage-dependent anion-selective channel protein 2	2670.86	427	11.3831				P45880	VDAC2	Voltage-dependent anion-selective channel protein 2	VDAC2_HUMAN	2894.77	346	11.4992
P45973	CBX5	Chromobox protein homolog 5	755.409	1183	9.56111				P45973	CBX5	Chromobox protein homolog 5	CBX5_HUMAN	729.221	1109	9.51021
P45974	USP5	Ubiquitin carboxyl-terminal hydrolase 5	2000.42	572	10.9661				P45974	USP5	Ubiquitin carboxyl-terminal hydrolase 5	UBP5_HUMAN	1320.98	727	10.3674
P46013	MKI67	Proliferation marker protein Ki-67	286.564	2166	8.16271				P46013	MKI67	Proliferation marker protein Ki-67	KI67_HUMAN	408.006	1650	8.67245
P46060	RANGAP1	Ran GTPase-activating protein 1	2328.75	490	11.1853				P46060	RANGAP1	Ran GTPase-activating protein 1	RAGP1_HUMAN	2707.96	372	11.403
P46063	RECQL	ATP-dependent DNA helicase Q1	50.4566	3093	5.65697				P46063	RECQL	ATP-dependent DNA helicase Q1	RECQ1_HUMAN	509.817	1455	8.99384
P46087	NOP2	Probable 28S rRNA (cytosine(4447)-C(5))-methyltransferase	659.162	1319	9.36449				P46087	NOP2	Probable 28S rRNA (cytosine(4447)-C(5))-methyltransferase	NOP2_HUMAN	854.405	997	9.73878
P46108	CRK	Adapter molecule crk	264.333	2239	8.04621				P46108	CRK	Adapter molecule crk	CRK_HUMAN	73.1251	3029	6.19229
P46109	CRKL	Crk-like protein	243.23	2322	7.92617				P46109	CRKL	Crk-like protein	CRKL_HUMAN	205.617	2406	7.68382
P46379	BAG6	Large proline-rich protein BAG6	2010.69	569	10.9735				P46379	BAG6	Large proline-rich protein BAG6	BAG6_HUMAN	1114.71	827	10.1224
P46459	NSF	Vesicle-fusing ATPase	845.978	1097	9.72448				P46459	NSF	Vesicle-fusing ATPase	NSF_HUMAN	675.939	1166	9.40075
P46776	RPL27A	60S ribosomal protein L27a	14537.7	48	13.8275				P46776	RPL27A	60S ribosomal protein L27a	RL27A_HUMAN	12311.3	47	13.5877
P46777	RPL5	60S ribosomal protein L5	4757.09	223	12.2159				P46777	RPL5	60S ribosomal protein L5	RL5_HUMAN	2867.12	350	11.4854
P46778	RPL21	60S ribosomal protein L21	2389.13	479	11.2223				P46778	RPL21	60S ribosomal protein L21	RL21_HUMAN	167.404	2592	7.38719
P46779	RPL28	60S ribosomal protein L28	2152.64	531	11.0719				P46779	RPL28	60S ribosomal protein L28	RL28_HUMAN	2288.15	449	11.16
P46781	RPS9	40S ribosomal protein S9	10549.3	79	13.3649				P46781	RPS9	40S ribosomal protein S9	RS9_HUMAN	7802.46	101	12.9297
P46782	RPS5	40S ribosomal protein S5	3124.74	369	11.6095				P46782	RPS5	40S ribosomal protein S5	RS5_HUMAN	3993.51	238	11.9634
P46783	RPS10	40S ribosomal protein S10	2221.95	513	11.1176				P46783	RPS10	40S ribosomal protein S10	RS10_HUMAN	1100.73	837	10.1043
P46821	MAP1B	Microtubule-associated protein 1B	1911.34	596	10.9004				P46821	MAP1B	Microtubule-associated protein 1B	MAP1B_HUMAN	1668.64	592	10.7045
P46926	GNPDA1	Glucosamine-6-phosphate isomerase 1	755.947	1181	9.56214				P46926	GNPDA1	Glucosamine-6-phosphate isomerase 1	GNPI1_HUMAN	1000.21	889	9.96609
P46937	YAP1	Transcriptional coactivator YAP1	630.45	1353	9.30024				P46937	YAP1	Transcriptional coactivator YAP1	YAP1_HUMAN	344.492	1840	8.42833
P46939	UTRN	Utrophin	138.741	2750	7.11625				P46939	UTRN	Utrophin	UTRO_HUMAN	124.604	2790	6.96121
P46940	IQGAP1	Ras GTPase-activating-like protein IQGAP1	3886.6	287	11.9243				P46940	IQGAP1	Ras GTPase-activating-like protein IQGAP1	IQGA1_HUMAN	2604.5	382	11.3468
P46976	GYG1	Glycogenin-1	572.406	1439	9.16089				P46976	GYG1	Glycogenin-1	GLYG_HUMAN	1131.42	818	10.1439
P46977	STT3A	Dolichyl-diphosphooligosaccharide--protein glycosyltransferase subunit STT3A	446.02	1694	8.80096				P46977	STT3A	Dolichyl-diphosphooligosaccharide--protein glycosyltransferase subunit STT3A	STT3A_HUMAN	249.041	2203	7.96024
P47224	RABIF	Guanine nucleotide exchange factor MSS4	1182.2	873	10.2073				P47224	RABIF	Guanine nucleotide exchange factor MSS4	MSS4_HUMAN	1289.44	742	10.3325
P47755	CAPZA2	F-actin-capping protein subunit alpha-2	563.328	1462	9.13783				P47755	CAPZA2	F-actin-capping protein subunit alpha-2	CAZA2_HUMAN	436.237	1598	8.76897
P47756	CAPZB	F-actin-capping protein subunit beta	2657.68	431	11.376				P47756	CAPZB	F-actin-capping protein subunit beta	CAPZB_HUMAN	2489.44	401	11.2816
P47813	EIF1AX	Eukaryotic translation initiation factor 1A, X-chromosomal	883.833	1065	9.78763				P47813	EIF1AX	Eukaryotic translation initiation factor 1A, X-chromosomal	IF1AX_HUMAN	523.289	1428	9.03146
P47897	QARS	Glutamine--tRNA ligase	1954.19	582	10.9324				P47897	QARS	Glutamine--tRNA ligase	SYQ_HUMAN	1798.24	561	10.8124
P47914	RPL29	60S ribosomal protein L29	3984.17	276	11.9601				P47914	RPL29	60S ribosomal protein L29	RL29_HUMAN	3638.51	264	11.8291
P48047	ATP5PO	ATP synthase subunit O, mitochondrial	1459.33	749	10.5111				P48047	ATP5PO	ATP synthase subunit O, mitochondrial	ATPO_HUMAN	1427.21	676	10.479
P48059	LIMS1	LIM and senescent cell antigen-like-containing domain protein 1	535.173	1518	9.06386				P48059	LIMS1	LIM and senescent cell antigen-like-containing domain protein 1	LIMS1_HUMAN	454.322	1568	8.82757
P48060	GLIPR1	Glioma pathogenesis-related protein 1	179.195	2577	7.48539				P48060	GLIPR1	Glioma pathogenesis-related protein 1	GLIP1_HUMAN	93.2939	2943	6.54371
P48147	PREP	Prolyl endopeptidase	403.373	1800	8.65597				P48147	PREP	Prolyl endopeptidase	PPCE_HUMAN	360.354	1791	8.49327
P48163	ME1	NADP-dependent malic enzyme	403.953	1799	8.65805				P48163	ME1	NADP-dependent malic enzyme	MAOX_HUMAN	398.541	1683	8.63858
P48426	PIP4K2A	Phosphatidylinositol 5-phosphate 4-kinase type-2 alpha	251.32	2290	7.97338				P48426	PIP4K2A	Phosphatidylinositol 5-phosphate 4-kinase type-2 alpha	PI42A_HUMAN	21.7156	3161	4.44066
P48444	ARCN1	Coatomer subunit delta	3655.72	311	11.8359				P48444	ARCN1	Coatomer subunit delta	COPD_HUMAN	3686.61	258	11.8481
P48449	LSS	Lanosterol synthase	341.807	1992	8.41704				P48449	LSS	Lanosterol synthase	ERG7_HUMAN	328.54	1898	8.35992
P48506	GCLC	Glutamate--cysteine ligase catalytic subunit	91.6456	2958	6.51799				P48506	GCLC	Glutamate--cysteine ligase catalytic subunit	GSH1_HUMAN	165.577	2600	7.37136
P48507	GCLM	Glutamate--cysteine ligase regulatory subunit	1847.84	621	10.8516				P48507	GCLM	Glutamate--cysteine ligase regulatory subunit	GSH0_HUMAN	2183.39	466	11.0924
P48509	CD151	CD151 antigen	8485.81	107	13.0508				P48509	CD151	CD151 antigen	CD151_HUMAN	8814.98	87	13.1057
P48556	PSMD8	26S proteasome non-ATPase regulatory subunit 8	1906.98	598	10.8971				P48556	PSMD8	26S proteasome non-ATPase regulatory subunit 8	PSMD8_HUMAN	1998.16	507	10.9645
P48634	PRRC2A	Protein PRRC2A	438.056	1710	8.77497				P48634	PRRC2A	Protein PRRC2A	PRC2A_HUMAN	274.905	2100	8.10279
P48637	GSS	Glutathione synthetase	2018.1	566	10.9788				P48637	GSS	Glutathione synthetase	GSHB_HUMAN	1797.41	562	10.8117
P48643	CCT5	T-complex protein 1 subunit epsilon	5577.98	183	12.4455				P48643	CCT5	T-complex protein 1 subunit epsilon	TCPE_HUMAN	5482.8	162	12.4207
P48681	NES	Nestin	299.095	2127	8.22446				P48681	NES	Nestin	NEST_HUMAN	194.642	2472	7.60468
P48723	HSPA13	Heat shock 70 kDa protein 13	99.8389	2920	6.64153				P48723	HSPA13	Heat shock 70 kDa protein 13	HSP13_HUMAN	176.451	2555	7.46312
P48729	CSNK1A1	Casein kinase I isoform alpha	214.651	2428	7.74585				P48729	CSNK1A1	Casein kinase I isoform alpha	KC1A_HUMAN	51.5165	3101	5.68696
P48735	IDH2	Isocitrate dehydrogenase [NADP], mitochondrial	94.0894	2943	6.55596				P48735	IDH2	Isocitrate dehydrogenase [NADP], mitochondrial	IDHP_HUMAN	200.037	2435	7.64412
P48739	PITPNB	Phosphatidylinositol transfer protein beta isoform	923.563	1035	9.85107				P48739	PITPNB	Phosphatidylinositol transfer protein beta isoform	PIPNB_HUMAN	758.583	1071	9.56716
P48960	CD97	CD97 antigen	1118.42	904	10.1272				P48960	CD97	CD97 antigen	CD97_HUMAN	454.44	1566	8.82795
P49005	POLD2	DNA polymerase delta subunit 2	183.166	2558	7.51701				P49005	POLD2	DNA polymerase delta subunit 2	DPOD2_HUMAN	108.724	2865	6.76453
P49006	MARCKSL1	MARCKS-related protein	440.409	1704	8.7827				P49006	MARCKSL1	MARCKS-related protein	MRP_HUMAN	299.027	2003	8.22413
P49023	PXN	Paxillin	608.702	1386	9.24959				P49023	PXN	Paxillin	PAXI_HUMAN	344.128	1843	8.4268
P49137	MAPKAPK2	MAP kinase-activated protein kinase 2	237.71	2347	7.89306				P49137	MAPKAPK2	MAP kinase-activated protein kinase 2	MAPK2_HUMAN	426.979	1617	8.73802
P49189	ALDH9A1	4-trimethylaminobutyraldehyde dehydrogenase	2036.02	558	10.9915				P49189	ALDH9A1	4-trimethylaminobutyraldehyde dehydrogenase	AL9A1_HUMAN	2014.08	502	10.9759
P49207	RPL34	60S ribosomal protein L34	1892.64	608	10.8862				P49207	RPL34	60S ribosomal protein L34	RL34_HUMAN	2750.79	364	11.4256
P49247	RPIA	Ribose-5-phosphate isomerase	87.1769	2977	6.44587				P49247	RPIA	Ribose-5-phosphate isomerase	RPIA_HUMAN	18.4834	3166	4.20816
P49257	LMAN1	Protein ERGIC-53	178.953	2579	7.48343				P49257	LMAN1	Protein ERGIC-53	LMAN1_HUMAN	398.713	1682	8.63921
P49321	NASP	Nuclear autoantigenic sperm protein	2909.89	395	11.5068				P49321	NASP	Nuclear autoantigenic sperm protein	NASP_HUMAN	3439.53	284	11.748
P49327	FASN	Fatty acid synthase	3544.18	324	11.7912				P49327	FASN	Fatty acid synthase	FAS_HUMAN	2972.21	334	11.5373
P49354	FNTA	Protein farnesyltransferase/geranylgeranyltransferase type-1 subunit alpha	116.203	2856	6.86051				P49354	FNTA	Protein farnesyltransferase/geranylgeranyltransferase type-1 subunit alpha	FNTA_HUMAN	151.503	2669	7.2432
P49366	DHPS	Deoxyhypusine synthase	449.533	1684	8.81228				P49366	DHPS	Deoxyhypusine synthase	DHYS_HUMAN	332.12	1894	8.37556
P49368	CCT3	T-complex protein 1 subunit gamma	6786.85	137	12.7285				P49368	CCT3	T-complex protein 1 subunit gamma	TCPG_HUMAN	4871.69	186	12.2502
P49406	MRPL19	39S ribosomal protein L19, mitochondrial	343.772	1988	8.42531				P49406	MRPL19	39S ribosomal protein L19, mitochondrial	RM19_HUMAN	186.728	2499	7.54479
P49407	ARRB1	Beta-arrestin-1	338.87	2005	8.40459				P49407	ARRB1	Beta-arrestin-1	ARRB1_HUMAN	98.2443	2916	6.6183
P49411	TUFM	Elongation factor Tu, mitochondrial	2394.3	478	11.2254				P49411	TUFM	Elongation factor Tu, mitochondrial	EFTU_HUMAN	2901.26	345	11.5025
P49419	ALDH7A1	Alpha-aminoadipic semialdehyde dehydrogenase	741.553	1199	9.53441				P49419	ALDH7A1	Alpha-aminoadipic semialdehyde dehydrogenase	AL7A1_HUMAN	874.342	975	9.77205
P49427	CDC34	Ubiquitin-conjugating enzyme E2 R1	921.318	1040	9.84756				P49427	CDC34	Ubiquitin-conjugating enzyme E2 R1	UB2R1_HUMAN	240.971	2240	7.91272
P49454	CENPF	Centromere protein F	7369.11	126	12.8473				P49454	CENPF	Centromere protein F	CENPF_HUMAN	2022.32	499	10.9818
P49458	SRP9	Signal recognition particle 9 kDa protein	1694.84	662	10.7269				P49458	SRP9	Signal recognition particle 9 kDa protein	SRP09_HUMAN	971.339	906	9.92383
P49585	PCYT1A	Choline-phosphate cytidylyltransferase A	568.09	1450	9.14998				P49585	PCYT1A	Choline-phosphate cytidylyltransferase A	PCY1A_HUMAN	599.293	1274	9.22712
P49588	AARS	Alanine--tRNA ligase, cytoplasmic	2568.92	445	11.3269				P49588	AARS	Alanine--tRNA ligase, cytoplasmic	SYAC_HUMAN	1854.26	539	10.8566
P49589	CARS	Cysteine--tRNA ligase, cytoplasmic	952.7	1007	9.89588				P49589	CARS	Cysteine--tRNA ligase, cytoplasmic	SYCC_HUMAN	857.421	993	9.74386
P49591	SARS	Serine--tRNA ligase, cytoplasmic	2469.9	457	11.2702				P49591	SARS	Serine--tRNA ligase, cytoplasmic	SYSC_HUMAN	1470.83	659	10.5224
P49593	PPM1F	Protein phosphatase 1F	918.68	1043	9.84342				P49593	PPM1F	Protein phosphatase 1F	PPM1F_HUMAN	768.017	1058	9.58499
P49642	PRIM1	DNA primase small subunit	210.798	2446	7.71972				P49642	PRIM1	DNA primase small subunit	PRI1_HUMAN	157.635	2635	7.30045
P49643	PRIM2	DNA primase large subunit	75.0161	3024	6.22913				P49643	PRIM2	DNA primase large subunit	PRI2_HUMAN	145.868	2699	7.18852
P49674	CSNK1E	Casein kinase I isoform epsilon	125.394	2816	6.97032				P49674	CSNK1E	Casein kinase I isoform epsilon	KC1E_HUMAN	155.74	2645	7.283
P49720	PSMB3	Proteasome subunit beta type-3	1105.7	912	10.1107				P49720	PSMB3	Proteasome subunit beta type-3	PSB3_HUMAN	444.612	1581	8.7964
P49721	PSMB2	Proteasome subunit beta type-2	2090.87	543	11.0299				P49721	PSMB2	Proteasome subunit beta type-2	PSB2_HUMAN	1789.82	567	10.8056
P49736	MCM2	DNA replication licensing factor MCM2	1763.39	645	10.7841				P49736	MCM2	DNA replication licensing factor MCM2	MCM2_HUMAN	1368.5	702	10.4184
P49748	ACADVL	Very long-chain specific acyl-CoA dehydrogenase, mitochondrial	822.459	1119	9.6838				P49748	ACADVL	Very long-chain specific acyl-CoA dehydrogenase, mitochondrial	ACADV_HUMAN	690.813	1149	9.43215
P49750	YLPM1	YLP motif-containing protein 1	630.226	1355	9.29973				P49750	YLPM1	YLP motif-containing protein 1	YLPM1_HUMAN	243.329	2228	7.92676
P49755	TMED10	Transmembrane emp24 domain-containing protein 10	364.778	1908	8.51088				P49755	TMED10	Transmembrane emp24 domain-containing protein 10	TMEDA_HUMAN	417.863	1629	8.70689
P49756	RBM25	RNA-binding protein 25	1225.52	851	10.2592				P49756	RBM25	RNA-binding protein 25	RBM25_HUMAN	870.763	980	9.76614
P49757	NUMB	Protein numb homolog	303.699	2115	8.2465				P49757	NUMB	Protein numb homolog	NUMB_HUMAN	129.979	2766	7.02213
P49770	EIF2B2	Translation initiation factor eIF-2B subunit beta	349.342	1966	8.4485				P49770	EIF2B2	Translation initiation factor eIF-2B subunit beta	EI2BB_HUMAN	389.282	1701	8.60467
P49773	HINT1	Histidine triad nucleotide-binding protein 1	2736	420	11.4179				P49773	HINT1	Histidine triad nucleotide-binding protein 1	HINT1_HUMAN	3071.4	320	11.5847
P49790	NUP153	Nuclear pore complex protein Nup153	314.28	2083	8.29591				P49790	NUP153	Nuclear pore complex protein Nup153	NU153_HUMAN	281.087	2075	8.13487
P49792	RANBP2	E3 SUMO-protein ligase RanBP2	378.659	1862	8.56475				P49792	RANBP2	E3 SUMO-protein ligase RanBP2	RBP2_HUMAN	296.276	2012	8.2108
P49821	NDUFV1	NADH dehydrogenase [ubiquinone] flavoprotein 1, mitochondrial	242.586	2325	7.92235				P49821	NDUFV1	NADH dehydrogenase [ubiquinone] flavoprotein 1, mitochondrial	NDUV1_HUMAN	412.172	1643	8.6871
P49840	GSK3A	Glycogen synthase kinase-3 alpha	164.619	2641	7.36299				P49840	GSK3A	Glycogen synthase kinase-3 alpha	GSK3A_HUMAN	122.733	2797	6.93938
P49902	NT5C2	Cytosolic purine 5'-nucleotidase	367.599	1898	8.52199				P49902	NT5C2	Cytosolic purine 5'-nucleotidase	5NTC_HUMAN	232.638	2293	7.86194
P49915	GMPS	GMP synthase [glutamine-hydrolyzing]	1712.81	657	10.7421				P49915	GMPS	GMP synthase [glutamine-hydrolyzing]	GUAA_HUMAN	1873.01	529	10.8711
P49916	LIG3	DNA ligase 3	30.5207	3133	4.93172				P49916	LIG3	DNA ligase 3	DNLI3_HUMAN	91.6765	2950	6.51848
P49959	MRE11	Double-strand break repair protein MRE11	315.169	2077	8.29998				P49959	MRE11	Double-strand break repair protein MRE11	MRE11_HUMAN	313.442	1962	8.29206
P50135	HNMT	Histamine N-methyltransferase	218.541	2410	7.77176				P50135	HNMT	Histamine N-methyltransferase	HNMT_HUMAN	302.071	1997	8.23874
P50213	IDH3A	Isocitrate dehydrogenase [NAD] subunit alpha, mitochondrial	839.559	1102	9.71349				P50213	IDH3A	Isocitrate dehydrogenase [NAD] subunit alpha, mitochondrial	IDH3A_HUMAN	247.967	2209	7.95401
P50281	MMP14	Matrix metalloproteinase-14	2158.79	528	11.076				P50281	MMP14	Matrix metalloproteinase-14	MMP14_HUMAN	1292.59	740	10.336
P50395	GDI2	Rab GDP dissociation inhibitor beta	8155.88	110	12.9936				P50395	GDI2	Rab GDP dissociation inhibitor beta	GDIB_HUMAN	4813.59	191	12.2329
P50402	EMD	Emerin	1091.18	926	10.0917				P50402	EMD	Emerin	EMD_HUMAN	452.524	1569	8.82185
P50416	CPT1A	Carnitine O-palmitoyltransferase 1, liver isoform	256.197	2273	8.00111				P50416	CPT1A	Carnitine O-palmitoyltransferase 1, liver isoform	CPT1A_HUMAN	104.643	2889	6.70933
P50452	SERPINB8	Serpin B8	1128.89	900	10.1407				P50452	SERPINB8	Serpin B8	SPB8_HUMAN	436.693	1597	8.77048
P50453	SERPINB9	Serpin B9	424.87	1744	8.73088				P50453	SERPINB9	Serpin B9	SPB9_HUMAN	648.732	1200	9.34148
P50454	SERPINH1	Serpin H1	2790.37	409	11.4462				P50454	SERPINH1	Serpin H1	SERPH_HUMAN	3262.48	300	11.6718
P50479	PDLIM4	PDZ and LIM domain protein 4	461.705	1638	8.85083				P50479	PDLIM4	PDZ and LIM domain protein 4	PDLI4_HUMAN	422.596	1626	8.72313
P50502	ST13	Hsc70-interacting protein	1892.96	606	10.8864				P50502	ST13	Hsc70-interacting protein	F10A1_HUMAN	1972.04	512	10.9455
P50552	VASP	Vasodilator-stimulated phosphoprotein	1296.74	819	10.3407				P50552	VASP	Vasodilator-stimulated phosphoprotein	VASP_HUMAN	899.852	958	9.81354
P50570	DNM2	Dynamin-2	1447.95	752	10.4998				P50570	DNM2	Dynamin-2	DYN2_HUMAN	1317.1	730	10.3632
P50579	METAP2	Methionine aminopeptidase 2	1220.63	855	10.2534				P50579	METAP2	Methionine aminopeptidase 2	MAP2_HUMAN	664.509	1180	9.37614
P50613	CDK7	Cyclin-dependent kinase 7	119.874	2844	6.90537				P50613	CDK7	Cyclin-dependent kinase 7	CDK7_HUMAN	71.4478	3040	6.15882
P50748	KNTC1	Kinetochore-associated protein 1	112.832	2870	6.81804				P50748	KNTC1	Kinetochore-associated protein 1	KNTC1_HUMAN	96.701	2923	6.59546
P50750	CDK9	Cyclin-dependent kinase 9	135.581	2765	7.08301				P50750	CDK9	Cyclin-dependent kinase 9	CDK9_HUMAN	148.303	2691	7.2124
P50851	LRBA	Lipopolysaccharide-responsive and beige-like anchor protein	73.5605	3027	6.20086				P50851	LRBA	Lipopolysaccharide-responsive and beige-like anchor protein	LRBA_HUMAN	171.418	2573	7.42137
P50914	RPL14	60S ribosomal protein L14	4845.71	219	12.2425				P50914	RPL14	60S ribosomal protein L14	RL14_HUMAN	3881.7	244	11.9225
[truncated: 2,057 more rows]

## Sheet: Figure 3d
PG.ProteinAccessions	PG.Genes	PG.ProteinDescriptions	PG.ProteinNames	[12] JHU_LM2_PACC_E1_1_15min_1.raw.PG.Quantity	rank				PG.ProteinAccessions	PG.Genes	PG.ProteinDescriptions	PG.ProteinNames	[2] JHU_LM2_PACC_E1_1_15min_2.raw.PG.Quantity	rank
[truncated: 1,213 more rows]

[truncated: 5 more sheets: Figure 3e, Figure 3f, Figure 5a, Figure 5b, Figure 5c]
